# Supplementary material for: Everything Is A Circle: A New Universal Orbital Model
Source: Preprints.org preprint supplement (doi:10.20944/preprints202104.0663.v1), 2021-04-26
Supplement: Supplementary file 2 [file supplementary]

## Sheet: Landsat Data
			Reference:			http://landsathandbook.gsfc.nasa.gov/excel_docs/d.xls							2014-04-04
	Earth-Sun distance (d) in astronomical units for Day of the Year (DOY)
	Compact													Expanded
	DOY	d	DOY	d	DOY	d	DOY	d	DOY	d	DOY	d		Date	DOY	d [au]
	1	0.98331	61	0.99108	121	1.00756	181	1.01665	241	1.00992	301	0.99359		2016-01-01	1	0.98331
	2	0.9833	62	0.99133	122	1.00781	182	1.01667	242	1.00969	302	0.99332		2016-01-02	2	0.983301
	3	0.9833	63	0.99158	123	1.00806	183	1.01668	243	1.00946	303	0.99306		2016-01-03	3	0.983297
	4	0.9833	64	0.99183	124	1.00831	184	1.0167	244	1.00922	304	0.99279		2016-01-04	4	0.983298
	5	0.9833	65	0.99208	125	1.00856	185	1.0167	245	1.00898	305	0.99253		2016-01-05	5	0.983305
	6	0.98332	66	0.99234	126	1.0088	186	1.0167	246	1.00874	306	0.99228		2016-01-06	6	0.983316
	7	0.98333	67	0.9926	127	1.00904	187	1.0167	247	1.0085	307	0.99202		2016-01-07	7	0.983332
	8	0.98335	68	0.99286	128	1.00928	188	1.01669	248	1.00825	308	0.99177		2016-01-08	8	0.983354
	9	0.98338	69	0.99312	129	1.00952	189	1.01668	249	1.008	309	0.99152		2016-01-09	9	0.983381
	10	0.98341	70	0.99339	130	1.00975	190	1.01666	250	1.00775	310	0.99127		2016-01-10	10	0.983413
	11	0.98345	71	0.99365	131	1.00998	191	1.01664	251	1.0075	311	0.99102		2016-01-11	11	0.983449
	12	0.98349	72	0.99392	132	1.0102	192	1.01661	252	1.00724	312	0.99078		2016-01-12	12	0.983491
	13	0.98354	73	0.99419	133	1.01043	193	1.01658	253	1.00698	313	0.99054		2016-01-13	13	0.983538
	14	0.98359	74	0.99446	134	1.01065	194	1.01655	254	1.00672	314	0.9903		2016-01-14	14	0.983591
	15	0.98365	75	0.99474	135	1.01087	195	1.0165	255	1.00646	315	0.99007		2016-01-15	15	0.983648
	16	0.98371	76	0.99501	136	1.01108	196	1.01646	256	1.0062	316	0.98983		2016-01-16	16	0.98371
	17	0.98378	77	0.99529	137	1.01129	197	1.01641	257	1.00593	317	0.98961		2016-01-17	17	0.983777
	18	0.98385	78	0.99556	138	1.0115	198	1.01635	258	1.00566	318	0.98938		2016-01-18	18	0.983849
	19	0.98393	79	0.99584	139	1.0117	199	1.01629	259	1.00539	319	0.98916		2016-01-19	19	0.983926
	20	0.98401	80	0.99612	140	1.01191	200	1.01623	260	1.00512	320	0.98894		2016-01-20	20	0.984008
	21	0.9841	81	0.9964	141	1.0121	201	1.01616	261	1.00485	321	0.98872		2016-01-21	21	0.984095
	22	0.98419	82	0.99669	142	1.0123	202	1.01609	262	1.00457	322	0.98851		2016-01-22	22	0.984187
	23	0.98428	83	0.99697	143	1.01249	203	1.01601	263	1.0043	323	0.9883		2016-01-23	23	0.984283
	24	0.98439	84	0.99725	144	1.01267	204	1.01592	264	1.00402	324	0.98809		2016-01-24	24	0.984385
	25	0.98449	85	0.99754	145	1.01286	205	1.01584	265	1.00374	325	0.98789		2016-01-25	25	0.984491
	26	0.9846	86	0.99782	146	1.01304	206	1.01575	266	1.00346	326	0.98769		2016-01-26	26	0.984602
	27	0.98472	87	0.99811	147	1.01321	207	1.01565	267	1.00318	327	0.9875		2016-01-27	27	0.984717
	28	0.98484	88	0.9984	148	1.01338	208	1.01555	268	1.0029	328	0.98731		2016-01-28	28	0.984837
	29	0.98496	89	0.99868	149	1.01355	209	1.01544	269	1.00262	329	0.98712		2016-01-29	29	0.984962
	30	0.98509	90	0.99897	150	1.01371	210	1.01533	270	1.00234	330	0.98694		2016-01-30	30	0.985091
	31	0.98523	91	0.99926	151	1.01387	211	1.01522	271	1.00205	331	0.98676		2016-01-31	31	0.985225
	32	0.98536	92	0.99954	152	1.01403	212	1.0151	272	1.00177	332	0.98658		2016-02-01	32	0.985363
	33	0.98551	93	0.99983	153	1.01418	213	1.01497	273	1.00148	333	0.98641		2016-02-02	33	0.985506
	34	0.98565	94	1.00012	154	1.01433	214	1.01485	274	1.00119	334	0.98624		2016-02-03	34	0.985653
	35	0.9858	95	1.00041	155	1.01447	215	1.01471	275	1.00091	335	0.98608		2016-02-04	35	0.985804
	36	0.98596	96	1.00069	156	1.01461	216	1.01458	276	1.00062	336	0.98592		2016-02-05	36	0.98596
	37	0.98612	97	1.00098	157	1.01475	217	1.01444	277	1.00033	337	0.98577		2016-02-06	37	0.98612
	38	0.98628	98	1.00127	158	1.01488	218	1.01429	278	1.00005	338	0.98562		2016-02-07	38	0.986284
	39	0.98645	99	1.00155	159	1.015	219	1.01414	279	0.99976	339	0.98547		2016-02-08	39	0.986452
	40	0.98662	100	1.00184	160	1.01513	220	1.01399	280	0.99947	340	0.98533		2016-02-09	40	0.986624
	41	0.9868	101	1.00212	161	1.01524	221	1.01383	281	0.99918	341	0.98519		2016-02-10	41	0.9868
	42	0.98698	102	1.0024	162	1.01536	222	1.01367	282	0.9989	342	0.98506		2016-02-11	42	0.986981
	43	0.98717	103	1.00269	163	1.01547	223	1.01351	283	0.99861	343	0.98493		2016-02-12	43	0.987165
	44	0.98735	104	1.00297	164	1.01557	224	1.01334	284	0.99832	344	0.98481		2016-02-13	44	0.987353
	45	0.98755	105	1.00325	165	1.01567	225	1.01317	285	0.99804	345	0.98469		2016-02-14	45	0.987545
	46	0.98774	106	1.00353	166	1.01577	226	1.01299	286	0.99775	346	0.98457		2016-02-15	46	0.987741
	47	0.98794	107	1.00381	167	1.01586	227	1.01281	287	0.99747	347	0.98446		2016-02-16	47	0.987941
	48	0.98814	108	1.00409	168	1.01595	228	1.01263	288	0.99718	348	0.98436		2016-02-17	48	0.988144
	49	0.98835	109	1.00437	169	1.01603	229	1.01244	289	0.9969	349	0.98426		2016-02-18	49	0.988351
	50	0.98856	110	1.00464	170	1.0161	230	1.01225	290	0.99662	350	0.98416		2016-02-19	50	0.988561
	51	0.98877	111	1.00492	171	1.01618	231	1.01205	291	0.99634	351	0.98407		2016-02-20	51	0.988775
	52	0.98899	112	1.00519	172	1.01625	232	1.01186	292	0.99605	352	0.98399		2016-02-21	52	0.988991
	53	0.98921	113	1.00546	173	1.01631	233	1.01165	293	0.99577	353	0.98391		2016-02-22	53	0.989212
	54	0.98944	114	1.00573	174	1.01637	234	1.01145	294	0.9955	354	0.98383		2016-02-23	54	0.989435
	55	0.98966	115	1.006	175	1.01642	235	1.01124	295	0.99522	355	0.98376		2016-02-24	55	0.989662
	56	0.98989	116	1.00626	176	1.01647	236	1.01103	296	0.99494	356	0.9837		2016-02-25	56	0.989891
	57	0.99012	117	1.00653	177	1.01652	237	1.01081	297	0.99467	357	0.98363		2016-02-26	57	0.990124
	58	0.99036	118	1.00679	178	1.01656	238	1.0106	298	0.9944	358	0.98358		2016-02-27	58	0.990359
	59	0.9906	119	1.00705	179	1.01659	239	1.01037	299	0.99412	359	0.98353		2016-02-28	59	0.990598
	60	0.99084	120	1.00731	180	1.01662	240	1.01015	300	0.99385	360	0.98348		2016-03-01	60	0.990839
											361	0.98344		2016-03-02	61	0.991083
											362	0.9834		2016-03-03	62	0.991329
											363	0.98337		2016-03-04	63	0.991578
											364	0.98335		2016-03-05	64	0.991829
											365	0.98333		2016-03-06	65	0.992083
											366	0.98331		2016-03-07	66	0.992339
														2016-03-08	67	0.992598
														2016-03-09	68	0.992858
														2016-03-10	69	0.99312
														2016-03-11	70	0.993385
														2016-03-12	71	0.993651
														2016-03-13	72	0.99392
														2016-03-14	73	0.99419
														2016-03-15	74	0.994462
														2016-03-16	75	0.994735
														2016-03-17	76	0.99501
														2016-03-18	77	0.995286
														2016-03-19	78	0.995564
														2016-03-20	79	0.995843
														2016-03-21	80	0.996123
														2016-03-22	81	0.996405
														2016-03-23	82	0.996687
														2016-03-24	83	0.99697
														2016-03-25	84	0.997254
														2016-03-26	85	0.997538
														2016-03-27	86	0.997824
														2016-03-28	87	0.99811
														2016-03-29	88	0.998396
														2016-03-30	89	0.998682
														2016-03-31	90	0.998969
														2016-04-01	91	0.999257
														2016-04-02	92	0.999544
														2016-04-03	93	0.999831
														2016-04-04	94	1.00012
														2016-04-05	95	1.00041
														2016-04-06	96	1.00069
														2016-04-07	97	1.00098
														2016-04-08	98	1.00127
														2016-04-09	99	1.00155
														2016-04-10	100	1.00184
														2016-04-11	101	1.00212
														2016-04-12	102	1.0024
														2016-04-13	103	1.00269
														2016-04-14	104	1.00297
														2016-04-15	105	1.00325
														2016-04-16	106	1.00353
														2016-04-17	107	1.00381
														2016-04-18	108	1.00409
														2016-04-19	109	1.00437
														2016-04-20	110	1.00464
														2016-04-21	111	1.00492
														2016-04-22	112	1.00519
														2016-04-23	113	1.00546
														2016-04-24	114	1.00573
														2016-04-25	115	1.006
														2016-04-26	116	1.00626
														2016-04-27	117	1.00653
														2016-04-28	118	1.00679
														2016-04-29	119	1.00705
														2016-04-30	120	1.00731
														2016-05-01	121	1.00756
														2016-05-02	122	1.00781
														2016-05-03	123	1.00806
														2016-05-04	124	1.00831
														2016-05-05	125	1.00856
														2016-05-06	126	1.0088
														2016-05-07	127	1.00904
														2016-05-08	128	1.00928
														2016-05-09	129	1.00952
														2016-05-10	130	1.00975
														2016-05-11	131	1.00998
														2016-05-12	132	1.0102
														2016-05-13	133	1.01043
														2016-05-14	134	1.01065
														2016-05-15	135	1.01087
														2016-05-16	136	1.01108
														2016-05-17	137	1.01129
														2016-05-18	138	1.0115
														2016-05-19	139	1.0117
														2016-05-20	140	1.01191
														2016-05-21	141	1.0121
														2016-05-22	142	1.0123
														2016-05-23	143	1.01249
														2016-05-24	144	1.01267
														2016-05-25	145	1.01286
														2016-05-26	146	1.01304
														2016-05-27	147	1.01321
														2016-05-28	148	1.01338
														2016-05-29	149	1.01355
														2016-05-30	150	1.01371
														2016-05-31	151	1.01387
														2016-06-01	152	1.01403
														2016-06-02	153	1.01418
														2016-06-03	154	1.01433
														2016-06-04	155	1.01447
														2016-06-05	156	1.01461
														2016-06-06	157	1.01475
														2016-06-07	158	1.01488
														2016-06-08	159	1.015
														2016-06-09	160	1.01513
														2016-06-10	161	1.01524
														2016-06-11	162	1.01536
														2016-06-12	163	1.01547
														2016-06-13	164	1.01557
														2016-06-14	165	1.01567
														2016-06-15	166	1.01577
														2016-06-16	167	1.01586
														2016-06-17	168	1.01595
														2016-06-18	169	1.01603
														2016-06-19	170	1.0161
														2016-06-20	171	1.01618
														2016-06-21	172	1.01625
														2016-06-22	173	1.01631
														2016-06-23	174	1.01637
														2016-06-24	175	1.01642
														2016-06-25	176	1.01647
														2016-06-26	177	1.01652
														2016-06-27	178	1.01656
														2016-06-28	179	1.01659
														2016-06-29	180	1.01662
														2016-06-30	181	1.01665
														2016-07-01	182	1.01667
														2016-07-02	183	1.01668
														2016-07-03	184	1.0167
														2016-07-04	185	1.0167
														2016-07-05	186	1.0167
														2016-07-06	187	1.0167
														2016-07-07	188	1.01669
														2016-07-08	189	1.01668
														2016-07-09	190	1.01666
														2016-07-10	191	1.01664
														2016-07-11	192	1.01661
														2016-07-12	193	1.01658
														2016-07-13	194	1.01655
														2016-07-14	195	1.0165
														2016-07-15	196	1.01646
														2016-07-16	197	1.01641
														2016-07-17	198	1.01635
														2016-07-18	199	1.01629
														2016-07-19	200	1.01623
														2016-07-20	201	1.01616
														2016-07-21	202	1.01609
														2016-07-22	203	1.01601
														2016-07-23	204	1.01592
														2016-07-24	205	1.01584
														2016-07-25	206	1.01575
														2016-07-26	207	1.01565
														2016-07-27	208	1.01555
														2016-07-28	209	1.01544
														2016-07-29	210	1.01533
														2016-07-30	211	1.01522
														2016-07-31	212	1.0151
														2016-08-01	213	1.01497
														2016-08-02	214	1.01485
														2016-08-03	215	1.01471
														2016-08-04	216	1.01458
														2016-08-05	217	1.01444
														2016-08-06	218	1.01429
														2016-08-07	219	1.01414
														2016-08-08	220	1.01399
														2016-08-09	221	1.01383
														2016-08-10	222	1.01367
														2016-08-11	223	1.01351
														2016-08-12	224	1.01334
														2016-08-13	225	1.01317
														2016-08-14	226	1.01299
														2016-08-15	227	1.01281
														2016-08-16	228	1.01263
														2016-08-17	229	1.01244
														2016-08-18	230	1.01225
														2016-08-19	231	1.01205
														2016-08-20	232	1.01186
														2016-08-21	233	1.01165
														2016-08-22	234	1.01145
														2016-08-23	235	1.01124
														2016-08-24	236	1.01103
														2016-08-25	237	1.01081
														2016-08-26	238	1.0106
														2016-08-27	239	1.01037
														2016-08-28	240	1.01015
														2016-08-29	241	1.00992
														2016-08-30	242	1.00969
														2016-08-31	243	1.00946
														2016-09-01	244	1.00922
														2016-09-02	245	1.00898
														2016-09-03	246	1.00874
														2016-09-04	247	1.0085
														2016-09-05	248	1.00825
														2016-09-06	249	1.008
														2016-09-07	250	1.00775
														2016-09-08	251	1.0075
														2016-09-09	252	1.00724
														2016-09-10	253	1.00698
														2016-09-11	254	1.00672
														2016-09-12	255	1.00646
														2016-09-13	256	1.0062
														2016-09-14	257	1.00593
														2016-09-15	258	1.00566
														2016-09-16	259	1.00539
														2016-09-17	260	1.00512
														2016-09-18	261	1.00485
														2016-09-19	262	1.00457
														2016-09-20	263	1.0043
														2016-09-21	264	1.00402
														2016-09-22	265	1.00374
														2016-09-23	266	1.00346
														2016-09-24	267	1.00318
														2016-09-25	268	1.0029
														2016-09-26	269	1.00262
														2016-09-27	270	1.00234
														2016-09-28	271	1.00205
														2016-09-29	272	1.00177
														2016-09-30	273	1.00148
														2016-10-01	274	1.00119
														2016-10-02	275	1.00091
														2016-10-03	276	1.00062
														2016-10-04	277	1.00033
														2016-10-05	278	1.00005
														2016-10-06	279	0.999759
														2016-10-07	280	0.999472
														2016-10-08	281	0.999184
														2016-10-09	282	0.998897
														2016-10-10	283	0.99861
														2016-10-11	284	0.998324
														2016-10-12	285	0.998038
														2016-10-13	286	0.997752
														2016-10-14	287	0.997467
														2016-10-15	288	0.997183
														2016-10-16	289	0.9969
														2016-10-17	290	0.996617
														2016-10-18	291	0.996335
														2016-10-19	292	0.996054
														2016-10-20	293	0.995775
														2016-10-21	294	0.995496
														2016-10-22	295	0.995219
														2016-10-23	296	0.994943
														2016-10-24	297	0.994668
														2016-10-25	298	0.994395
														2016-10-26	299	0.994124
														2016-10-27	300	0.993854
														2016-10-28	301	0.993586
														2016-10-29	302	0.99332
														2016-10-30	303	0.993056
														2016-10-31	304	0.992793
														2016-11-01	305	0.992533
														2016-11-02	306	0.992275
														2016-11-03	307	0.99202
														2016-11-04	308	0.991766
														2016-11-05	309	0.991515
														2016-11-06	310	0.991267
														2016-11-07	311	0.991021
														2016-11-08	312	0.990778
														2016-11-09	313	0.990538
														2016-11-10	314	0.9903
														2016-11-11	315	0.990065
														2016-11-12	316	0.989834
														2016-11-13	317	0.989605
														2016-11-14	318	0.989379
														2016-11-15	319	0.989157
														2016-11-16	320	0.988938
														2016-11-17	321	0.988722
														2016-11-18	322	0.988509
														2016-11-19	323	0.9883
														2016-11-20	324	0.988094
														2016-11-21	325	0.987892
														2016-11-22	326	0.987694
														2016-11-23	327	0.987499
														2016-11-24	328	0.987308
														2016-11-25	329	0.98712
														2016-11-26	330	0.986937
														2016-11-27	331	0.986757
														2016-11-28	332	0.986582
														2016-11-29	333	0.98641
														2016-11-30	334	0.986243
														2016-12-01	335	0.986079
														2016-12-02	336	0.98592
														2016-12-03	337	0.985765
														2016-12-04	338	0.985615
														2016-12-05	339	0.985469
														2016-12-06	340	0.985328
														2016-12-07	341	0.98519
														2016-12-08	342	0.985058
														2016-12-09	343	0.98493
														2016-12-10	344	0.984807
														2016-12-11	345	0.984688
														2016-12-12	346	0.984574
														2016-12-13	347	0.984464
														2016-12-14	348	0.984359
														2016-12-15	349	0.984259
														2016-12-16	350	0.984164
														2016-12-17	351	0.984074
														2016-12-18	352	0.983989
														2016-12-19	353	0.983908
														2016-12-20	354	0.983832
														2016-12-21	355	0.983761
														2016-12-22	356	0.983695
														2016-12-23	357	0.983634
														2016-12-24	358	0.983578
														2016-12-25	359	0.983527
														2016-12-26	360	0.983482
														2016-12-27	361	0.983441
														2016-12-28	362	0.983405
														2016-12-29	363	0.983374
														2016-12-30	364	0.983348
														2016-12-31	365	0.983328

## Sheet: Initial Work on Landsat Data
Earth-Sun distance (d) in astronomical units for Day of the Year (DOY)
Date	DOY	d (orig) [au]	d [km]	d^2 [au^2]	d (mid) [au]	d^2 [au^2]	d (1st Q) [au]	d^2 [au^2]	d (3rd Q) [au]	d^2 [au^2]	k1(phi) [au^2]	k2(phi) [au^2]	k1(phi)+k2(phi) [au^2]	k1(phi)-k2(phi) [au^2]	k3(phi) [au^2]	k4(phi) [au^2]	k3(phi)^2+k4(phi)^2 [au^4]	sqrt(k3(phi)^2+k4(phi)^2) [au^2]	k3(phi) / sqrt(k3(phi)^2+k4(phi)^2)		(a^2+l^2) = k5 - (b^2+l^2) [au^2]	k1 - (b^2+l^2) [au^2]	k2 - (b^2+l^2) [au^2]	k1 - (a^2+l^2) [au^2]	k2 - (a^2+l^2) [au^2]
2016-01-01	1	0.98331	1.47101e+08	0.966898	0.983305	0.96689	0.983308	0.966894	0.983303	0.966885	1.00028	1.0006	2.00087	-0.000317145	-0.0166901	-0.000682128	0.000279024	0.016704	-0.999166		1.00044	-0.000158667	0.000158478	-0.000159357	0.000157788
2016-01-02	2	0.983301	1.471e+08	0.966881	0.983299	0.966877	0.9833	0.966879	0.983298	0.966875	1.00028	1.0006	2.00087	-0.000316966	-0.0166989	-0.00039498	0.000279009	0.0167036	-0.99972		1.00044	-0.000158323	0.000158644	-0.000159013	0.000157954
2016-01-03	3	0.983297	1.47099e+08	0.966873	0.983298	0.966874	0.983297	0.966874	0.983298	0.966875	1.00028	1.0006	2.00087	-0.000316512	-0.0167029	-0.000107632	0.000279	0.0167033	-0.999979		1.00044	-0.000158087	0.000158424	-0.000158777	0.000157734		1 Astronomical Unit = 149 597 871 kilometers
2016-01-04	4	0.983298	1.47099e+08	0.966876	0.983301	0.966882	0.9833	0.966879	0.983303	0.966885	1.00028	1.0006	2.00087	-0.000315891	-0.0167019	0.000179491	0.000278987	0.0167029	-0.999942		1.00044	-0.000157572	0.00015832	-0.000158262	0.00015763
2016-01-05	5	0.983305	1.471e+08	0.966888	0.98331	0.966899	0.983307	0.966893	0.983313	0.966905	1.00028	1.0006	2.00087	-0.000315071	-0.0166961	0.000466651	0.000278978	0.0167026	-0.99961		1.00044	-0.000157016	0.000158055	-0.000157706	0.000157365		1 astronomical unit	= 149597870700 metres (exactly)
2016-01-06	6	0.983316	1.47102e+08	0.96691	0.983324	0.966926	0.98332	0.966918	0.983328	0.966934	1.00028	1.00059	2.00088	-0.000313908	-0.0166853	0.000753699	0.000278967	0.0167023	-0.998981		1.00044	-0.000156227	0.00015768	-0.000156918	0.00015699			≈ 92.955807 million miles
2016-01-07	7	0.983332	1.47104e+08	0.966943	0.983343	0.966964	0.983338	0.966953	0.983349	0.966975	1.00028	1.00059	2.00088	-0.000312122	-0.0166696	0.00104057	0.000278957	0.016702	-0.998057		1.00044	-0.000155253	0.000156869	-0.000155943	0.000156179			≈ 4.8481368 millionths of a parsec
2016-01-08	8	0.983354	1.47108e+08	0.966985	0.983367	0.967011	0.983361	0.966998	0.983374	0.967024	1.00028	1.00059	2.00088	-0.000309788	-0.0166489	0.00132703	0.000278947	0.0167017	-0.996838		1.00044	-0.000153892	0.000155896	-0.000154582	0.000155206			≈ 15.812507 millionths of a light-year
2016-01-09	9	0.983381	1.47112e+08	0.967037	0.983397	0.967069	0.983389	0.967053	0.983405	0.967085	1.00028	1.00059	2.00088	-0.000308027	-0.0166234	0.00161309	0.000278939	0.0167015	-0.995325		1.00044	-0.000152791	0.000155237	-0.000153481	0.000154546
2016-01-10	10	0.983413	1.47116e+08	0.9671	0.983431	0.967137	0.983422	0.967118	0.98344	0.967155	1.00029	1.00059	2.00088	-0.000305298	-0.0165927	0.00189872	0.000278924	0.016701	-0.993516		1.00044	-0.00015116	0.000154138	-0.00015185	0.000153448		1 au =	1.49598e+08
2016-01-11	11	0.983449	1.47122e+08	0.967173	0.98347	0.967214	0.98346	0.967193	0.983481	0.967235	1.00029	1.00059	2.00088	-0.000302383	-0.0165574	0.00218375	0.000278916	0.0167008	-0.991414		1.00044	-0.000149482	0.000152901	-0.000150173	0.000152211
2016-01-12	12	0.983491	1.47128e+08	0.967255	0.983515	0.967302	0.983503	0.967278	0.983527	0.967325	1.00029	1.00059	2.00088	-0.000299113	-0.0165171	0.00246819	0.000278907	0.0167005	-0.989019		1.00044	-0.000147415	0.000151697	-0.000148105	0.000151007
2016-01-13	13	0.983538	1.47135e+08	0.967348	0.983564	0.967399	0.983551	0.967373	0.983578	0.967425	1.00029	1.00059	2.00088	-0.000295582	-0.016472	0.0027519	0.000278899	0.0167003	-0.98633		1.00044	-0.000145256	0.000150327	-0.000145946	0.000149637
2016-01-14	14	0.983591	1.47143e+08	0.96745	0.983619	0.967507	0.983605	0.967479	0.983633	0.967535	1.00029	1.00059	2.00088	-0.000291491	-0.0164219	0.00303471	0.000278887	0.0166999	-0.98335		1.00044	-0.000142805	0.000148686	-0.000143495	0.000147996
2016-01-15	15	0.983648	1.47152e+08	0.967563	0.983679	0.967624	0.983663	0.967593	0.983694	0.967654	1.0003	1.00058	2.00088	-0.000287304	-0.016367	0.00331672	0.000278881	0.0166997	-0.980079		1.00044	-0.000140303	0.000147001	-0.000140994	0.00014631
2016-01-16	16	0.98371	1.47161e+08	0.967685	0.983743	0.967751	0.983727	0.967718	0.98376	0.967784	1.0003	1.00058	2.00088	-0.000282549	-0.0163073	0.00359777	0.000278871	0.0166994	-0.976516		1.00044	-0.000137457	0.000145092	-0.000138147	0.000144402
2016-01-17	17	0.983777	1.47171e+08	0.967817	0.983813	0.967888	0.983795	0.967853	0.983831	0.967924	1.0003	1.00058	2.00088	-0.000277496	-0.0162426	0.00387785	0.00027886	0.0166991	-0.972664		1.00045	-0.000134363	0.000143133	-0.000135053	0.000142443
2016-01-18	18	0.983849	1.47182e+08	0.967959	0.983888	0.968035	0.983868	0.967997	0.983907	0.968073	1.00031	1.00058	2.00088	-0.000272259	-0.0161733	0.0041568	0.000278854	0.0166989	-0.968522		1.00045	-0.000131362	0.000140897	-0.000132052	0.000140207
2016-01-19	19	0.983926	1.47193e+08	0.968111	0.983967	0.968192	0.983947	0.968151	0.983988	0.968232	1.00031	1.00058	2.00088	-0.000266665	-0.016099	0.00443438	0.000278841	0.0166985	-0.964096		1.00045	-0.000128061	0.000138604	-0.000128751	0.000137914
2016-01-20	20	0.984008	1.47206e+08	0.968272	0.984052	0.968358	0.98403	0.968315	0.984074	0.968401	1.00031	1.00057	2.00089	-0.00026073	-0.0160199	0.00471067	0.000278828	0.0166982	-0.959383		1.00045	-0.000124801	0.000135928	-0.000125492	0.000135238
2016-01-21	21	0.984095	1.47219e+08	0.968444	0.984141	0.968534	0.984118	0.968489	0.984164	0.968579	1.00032	1.00057	2.00089	-0.000254749	-0.0159361	0.00498565	0.000278815	0.0166978	-0.954384		1.00045	-0.000121282	0.000133467	-0.000121972	0.000132777
2016-01-22	22	0.984187	1.47232e+08	0.968624	0.984235	0.968719	0.984211	0.968671	0.984259	0.968766	1.00032	1.00057	2.00089	-0.000248335	-0.0158476	0.00525917	0.000278807	0.0166975	-0.949102		1.00045	-0.000117844	0.000130491	-0.000118534	0.000129801
2016-01-23	23	0.984283	1.47247e+08	0.968814	0.984334	0.968914	0.984309	0.968864	0.98436	0.968964	1.00032	1.00056	2.00089	-0.000241363	-0.0157545	0.00553115	0.000278797	0.0166972	-0.943539		1.00045	-0.00011404	0.000127323	-0.00011473	0.000126633
2016-01-24	24	0.984385	1.47262e+08	0.969014	0.984438	0.969118	0.984412	0.969066	0.984465	0.96917	1.00033	1.00056	2.00089	-0.000234175	-0.0156565	0.00580147	0.000278784	0.0166968	-0.937695		1.00045	-0.000110067	0.000124108	-0.000110757	0.000123418
2016-01-25	25	0.984491	1.47278e+08	0.969223	0.984546	0.969332	0.984519	0.969277	0.984574	0.969386	1.00033	1.00056	2.00089	-0.000226785	-0.015554	0.00607005	0.000278774	0.0166965	-0.931574		1.00045	-0.000106167	0.000120618	-0.000106857	0.000119928
2016-01-26	26	0.984602	1.47294e+08	0.969441	0.98466	0.969554	0.984631	0.969498	0.984688	0.969611	1.00033	1.00055	2.00089	-0.000219188	-0.015447	0.00633686	0.000278765	0.0166962	-0.925176		1.00045	-0.000102338	0.00011685	-0.000103028	0.00011616
2016-01-27	27	0.984717	1.47312e+08	0.969668	0.984777	0.969786	0.984747	0.969727	0.984807	0.969845	1.00034	1.00055	2.00089	-0.000211603	-0.0153352	0.00660178	0.000278753	0.0166959	-0.918503		1.00045	-9.85278e-05	0.000113075	-9.92179e-05	0.000112385
2016-01-28	28	0.984837	1.4733e+08	0.969905	0.9849	0.970027	0.984868	0.969966	0.984931	0.970089	1.00034	1.00055	2.00089	-0.000203542	-0.015219	0.00686472	0.000278743	0.0166956	-0.911559		1.00045	-9.44299e-05	0.000109112	-9.512e-05	0.000108422
2016-01-29	29	0.984962	1.47348e+08	0.97015	0.985027	0.970277	0.984994	0.970214	0.985059	0.970341	1.00035	1.00054	2.00089	-0.000195251	-0.0150983	0.00712564	0.000278733	0.0166953	-0.904344		1.00045	-9.02916e-05	0.000104959	-9.09817e-05	0.000104269
2016-01-30	30	0.985091	1.47368e+08	0.970405	0.985158	0.970536	0.985125	0.970471	0.985192	0.970602	1.00035	1.00054	2.00089	-0.000186994	-0.0149731	0.00738446	0.000278723	0.016695	-0.89686		1.00045	-8.61573e-05	0.000100836	-8.68474e-05	0.000100146
2016-01-31	31	0.985225	1.47388e+08	0.970668	0.985294	0.970804	0.98526	0.970736	0.985329	0.970873	1.00036	1.00053	2.00089	-0.000178212	-0.0148435	0.00764116	0.000278716	0.0166948	-0.889108		1.00045	-8.17222e-05	9.64903e-05	-8.24123e-05	9.58001e-05
2016-02-01	32	0.985363	1.47408e+08	0.970941	0.985434	0.971081	0.985399	0.971011	0.98547	0.971151	1.00036	1.00053	2.00089	-0.000169447	-0.0147095	0.00789548	0.000278707	0.0166945	-0.881095		1.00045	-7.74337e-05	9.20131e-05	-7.81238e-05	9.1323e-05		MAX (d) =	1.52097e+08	km
2016-02-02	33	0.985506	1.4743e+08	0.971222	0.985579	0.971366	0.985543	0.971294	0.985616	0.971439	1.00036	1.00052	2.00089	-0.000160459	-0.0145712	0.00814732	0.000278697	0.0166942	-0.872826		1.00045	-7.29837e-05	8.7475e-05	-7.36738e-05	8.67849e-05		MAX (d) =	1.0167	au
2016-02-03	34	0.985653	1.47452e+08	0.971511	0.985728	0.97166	0.985691	0.971586	0.985766	0.971735	1.00037	1.00052	2.00089	-0.000151192	-0.0144286	0.0083968	0.000278691	0.016694	-0.864297		1.00045	-6.85181e-05	8.26742e-05	-6.92082e-05	8.1984e-05		Day of Year [MAX (d)] =	186
2016-02-04	35	0.985804	1.47474e+08	0.97181	0.985882	0.971963	0.985843	0.971886	0.985921	0.97204	1.00037	1.00051	2.00089	-0.000141896	-0.0142817	0.00864403	0.000278685	0.0166939	-0.855504		1.00045	-6.39374e-05	7.7959e-05	-6.46275e-05	7.72688e-05		Index [MAX (d)] =	188
2016-02-05	36	0.98596	1.47497e+08	0.972117	0.98604	0.972274	0.986	0.972195	0.98608	0.972353	1.00038	1.00051	2.00089	-0.000132447	-0.0141306	0.00888848	0.000278678	0.0166936	-0.846463		1.00045	-5.93308e-05	7.31166e-05	-6.00209e-05	7.24265e-05		Date in Year [MAX (d)] =	2016-07-05
2016-02-06	37	0.98612	1.47521e+08	0.972432	0.986202	0.972594	0.986161	0.972513	0.986243	0.972675	1.00038	1.00051	2.00089	-0.000123115	-0.0139753	0.00913034	0.000278673	0.0166935	-0.837172		1.00045	-5.46437e-05	6.84716e-05	-5.53338e-05	6.77815e-05
2016-02-07	38	0.986284	1.47546e+08	0.972756	0.986368	0.972921	0.986326	0.972838	0.98641	0.973004	1.00039	1.0005	2.00089	-0.000113268	-0.0138159	0.00936955	0.000278668	0.0166933	-0.82763		1.00045	-4.96244e-05	6.3644e-05	-5.03145e-05	6.29538e-05		MIN (d) =	1.47099e+08	km
2016-02-08	39	0.986452	1.47571e+08	0.973087	0.986538	0.973257	0.986495	0.973172	0.986581	0.973342	1.00039	1.0005	2.00089	-0.000103563	-0.0136525	0.00960586	0.000278663	0.0166932	-0.817847		1.00045	-4.50127e-05	5.85502e-05	-4.57028e-05	5.78601e-05		MIN (d) =	0.983297	au
2016-02-09	40	0.986624	1.47597e+08	0.973427	0.986712	0.973601	0.986668	0.973514	0.986756	0.973688	1.0004	1.00049	2.00089	-9.37502e-05	-0.013485	0.00983954	0.000278661	0.0166931	-0.807815		1.00045	-3.99088e-05	5.38414e-05	-4.05989e-05	5.31512e-05		Day of Year [MIN (d)] =	3
2016-02-10	41	0.9868	1.47623e+08	0.973775	0.986891	0.973953	0.986846	0.973864	0.986936	0.974042	1.0004	1.00049	2.00089	-8.38832e-05	-0.0133136	0.0100702	0.00027866	0.0166931	-0.797548		1.00045	-3.48018e-05	4.90813e-05	-3.5492e-05	4.83912e-05		Index [MIN (d)] =	5
2016-02-11	42	0.986981	1.4765e+08	0.974131	0.987073	0.974313	0.987027	0.974222	0.987119	0.974404	1.00041	1.00048	2.00089	-7.36063e-05	-0.0131381	0.0102978	0.000278654	0.0166929	-0.787046		1.00045	-2.94424e-05	4.41639e-05	-3.01325e-05	4.34738e-05		Date in Year [MIN (d)] =	2016-01-03
2016-02-12	43	0.987165	1.47678e+08	0.974495	0.987259	0.974681	0.987212	0.974588	0.987306	0.974774	1.00041	1.00048	2.00089	-6.33328e-05	-0.0129588	0.0105223	0.00027865	0.0166928	-0.77631		1.00045	-2.42211e-05	3.91116e-05	-2.49113e-05	3.84215e-05
2016-02-13	44	0.987353	1.47706e+08	0.974867	0.987449	0.975056	0.987401	0.974961	0.987497	0.975151	1.00042	1.00047	2.00089	-5.33044e-05	-0.0127757	0.0107439	0.000278649	0.0166928	-0.765341		1.00045	-1.90832e-05	3.42211e-05	-1.97734e-05	3.3531e-05		d (Summer Solctice)	1.52028e+08	km
2016-02-14	45	0.987545	1.47735e+08	0.975246	0.987643	0.975439	0.987594	0.975343	0.987692	0.975536	1.00042	1.00047	2.00089	-4.28825e-05	-0.0125887	0.0109623	0.000278648	0.0166927	-0.754145		1.00045	-1.35738e-05	2.93087e-05	-1.42639e-05	2.86186e-05		d (Summer Solctice)	1.01625	au
2016-02-15	46	0.987741	1.47764e+08	0.975633	0.987841	0.97583	0.987791	0.975731	0.987891	0.975928	1.00043	1.00046	2.00089	-3.26075e-05	-0.0123981	0.0111774	0.000278648	0.0166927	-0.742723		1.00045	-8.13677e-06	2.44707e-05	-8.8269e-06	2.37806e-05		Day of Year [Summer Solctice] =	172
2016-02-16	47	0.987941	1.47794e+08	0.976027	0.988042	0.976227	0.987991	0.976127	0.988093	0.976328	1.00043	1.00046	2.00089	-2.22645e-05	-0.0122038	0.0113892	0.000278647	0.0166927	-0.731083		1.00045	-2.81605e-06	1.94485e-05	-3.50619e-06	1.87583e-05		Index [Summer Solctice] =	174
2016-02-17	48	0.988144	1.47824e+08	0.976428	0.988247	0.976633	0.988196	0.97653	0.988299	0.976735	1.00044	1.00045	2.00089	-1.16998e-05	-0.0120057	0.0115978	0.000278645	0.0166927	-0.71922		1.00045	2.79026e-06	1.44901e-05	2.10013e-06	1.37999e-05		Date in Year [Summer Solctice] =	2016-06-21
2016-02-18	49	0.988351	1.47855e+08	0.976837	0.988456	0.977045	0.988403	0.976941	0.988508	0.977149	1.00045	1.00045	2.00089	-1.21833e-06	-0.0118042	0.0118028	0.000278644	0.0166926	-0.707147		1.00045	8.24305e-06	9.46138e-06	7.55292e-06	8.77124e-06
2016-02-19	50	0.988561	1.47887e+08	0.977253	0.988668	0.977464	0.988614	0.977358	0.988721	0.977569	1.00045	1.00044	2.00089	9.25721e-06	-0.0115991	0.0120045	0.000278647	0.0166927	-0.694857		1.00046	1.37948e-05	4.53761e-06	1.31047e-05	3.84748e-06		d (Winter Solctice)	1.47169e+08	km
2016-02-20	51	0.988775	1.47919e+08	0.977675	0.988883	0.977889	0.988829	0.977782	0.988937	0.977997	1.00046	1.00044	2.00089	2.01242e-05	-0.0113906	0.0122026	0.000278649	0.0166928	-0.682367		1.00046	1.92545e-05	-8.6975e-07	1.85643e-05	-1.55988e-06		d (Winter Solctice)	0.983761	au
2016-02-21	52	0.988991	1.47951e+08	0.978104	0.989102	0.978322	0.989046	0.978213	0.989157	0.978431	1.00046	1.00043	2.00089	3.05164e-05	-0.0111788	0.0123969	0.00027865	0.0166928	-0.669678		1.00046	2.44261e-05	-6.0903e-06	2.3736e-05	-6.78044e-06		Day of Year [Winter Solctice] =	355
2016-02-22	53	0.989212	1.47984e+08	0.97854	0.989323	0.978761	0.989268	0.97865	0.989379	0.978871	1.00047	1.00043	2.00089	4.11582e-05	-0.0109635	0.0125878	0.000278652	0.0166929	-0.656778		1.00046	2.98615e-05	-1.12968e-05	2.91713e-05	-1.19869e-05		Index [Winter Solctice] =	357
2016-02-23	54	0.989435	1.48017e+08	0.978982	0.989549	0.979206	0.989492	0.979094	0.989605	0.979319	1.00047	1.00042	2.00089	5.18004e-05	-0.0107451	0.0127749	0.000278656	0.016693	-0.643691		1.00046	3.52724e-05	-1.6528e-05	3.45822e-05	-1.72182e-05		Date in Year [Winter Solctice] =	2016-12-21
2016-02-24	55	0.989662	1.48051e+08	0.979431	0.989777	0.979658	0.989719	0.979544	0.989834	0.979771	1.00048	1.00042	2.00089	6.24228e-05	-0.0105234	0.0129582	0.000278657	0.016693	-0.630409		1.00046	4.05598e-05	-2.1863e-05	3.98697e-05	-2.25532e-05
2016-02-25	56	0.989891	1.48086e+08	0.979885	0.990008	0.980115	0.98995	0.98	0.990066	0.98023	1.00048	1.00041	2.00089	7.25151e-05	-0.0102987	0.0131376	0.000278659	0.0166931	-0.616945		1.00046	4.54332e-05	-2.70819e-05	4.4743e-05	-2.7772e-05		d (Spring Equinox)	1.48976e+08	km
2016-02-26	57	0.990124	1.4812e+08	0.980346	0.990242	0.980579	0.990183	0.980462	0.990301	0.980695	1.00049	1.0004	2.00089	8.2787e-05	-0.0100709	0.0133131	0.000278661	0.0166931	-0.603298		1.00046	5.04462e-05	-3.23408e-05	4.97561e-05	-3.3031e-05		d (Spring Equinox)	0.995843	au
2016-02-27	58	0.990359	1.48156e+08	0.980812	0.990479	0.981048	0.990419	0.98093	0.990538	0.981166	1.00049	1.0004	2.00089	9.28441e-05	-0.00984015	0.0134847	0.000278666	0.0166933	-0.589467		1.00045	5.52535e-05	-3.75906e-05	5.45633e-05	-3.82807e-05		Day of Year [Spring Equinox] =	79
2016-02-28	59	0.990598	1.48191e+08	0.981284	0.990718	0.981523	0.990658	0.981403	0.990779	0.981642	1.0005	1.00039	2.00089	0.000102754	-0.00960647	0.0136524	0.000278671	0.0166934	-0.575464		1.00045	5.9962e-05	-4.27919e-05	5.92719e-05	-4.3482e-05		Index [Spring Equinox] =	81
2016-03-01	60	0.990839	1.48227e+08	0.981762	0.990961	0.982003	0.9909	0.981883	0.991022	0.982124	1.0005	1.00039	2.00089	0.00011305	-0.00936996	0.0138159	0.000278676	0.0166936	-0.561291		1.00045	6.48769e-05	-4.81735e-05	6.41868e-05	-4.88637e-05		Date in Year [Spring Equinox] =	2016-03-20
2016-03-02	61	0.991083	1.48264e+08	0.982245	0.991206	0.982489	0.991144	0.982367	0.991267	0.982611	1.00051	1.00038	2.00089	0.000123098	-0.00913078	0.0139753	0.000278681	0.0166937	-0.546958		1.00045	6.95048e-05	-5.35936e-05	6.88147e-05	-5.42837e-05
2016-03-03	62	0.991329	1.48301e+08	0.982733	0.991454	0.98298	0.991391	0.982857	0.991516	0.983104	1.00051	1.00038	2.00089	0.000132325	-0.00888879	0.0141307	0.000278686	0.0166939	-0.532458		1.00045	7.39974e-05	-5.83279e-05	7.33073e-05	-5.9018e-05		d (Autumn Equinox)	1.50116e+08	km
2016-03-04	63	0.991578	1.48338e+08	0.983227	0.991704	0.983476	0.991641	0.983352	0.991766	0.983601	1.00052	1.00037	2.00089	0.000141895	-0.00864415	0.0142818	0.000278691	0.016694	-0.517799		1.00045	7.84612e-05	-6.34338e-05	7.77711e-05	-6.41239e-05		d (Autumn Equinox)	1.00346	au
2016-03-05	64	0.991829	1.48376e+08	0.983725	0.991956	0.983977	0.991893	0.983851	0.99202	0.984103	1.00052	1.00037	2.00089	0.000151226	-0.00839716	0.0144285	0.000278695	0.0166942	-0.503		1.00045	8.27053e-05	-6.85202e-05	8.20151e-05	-6.92104e-05		Day of Year [Autumn Equinox] =	266
2016-03-06	65	0.992083	1.48414e+08	0.984229	0.992211	0.984483	0.992147	0.984356	0.992275	0.98461	1.00052	1.00036	2.00089	0.000160213	-0.00814754	0.0145711	0.0002787	0.0166943	-0.488043		1.00045	8.69785e-05	-7.32344e-05	8.62884e-05	-7.39246e-05		Index [Autumn Equinox] =	268
2016-03-07	66	0.992339	1.48452e+08	0.984737	0.992468	0.984993	0.992404	0.984865	0.992533	0.985122	1.00053	1.00036	2.00089	0.000169072	-0.00789549	0.0147094	0.000278707	0.0166945	-0.472939		1.00045	9.10881e-05	-7.79837e-05	9.0398e-05	-7.86738e-05		Date in Year [Autumn Equinox] =	2016-09-23
2016-03-08	67	0.992598	1.4849e+08	0.98525	0.992728	0.985508	0.992663	0.985379	0.992793	0.985638	1.00053	1.00035	2.00089	0.000177689	-0.00764118	0.0148434	0.000278714	0.0166947	-0.4577		1.00045	9.51903e-05	-8.24991e-05	9.45002e-05	-8.31892e-05
2016-03-09	68	0.992858	1.48529e+08	0.985767	0.992989	0.986027	0.992924	0.985897	0.993055	0.986158	1.00054	1.00035	2.00089	0.00018633	-0.00738475	0.0149728	0.00027872	0.0166949	-0.442335		1.00045	9.93405e-05	-8.69894e-05	9.86504e-05	-8.76796e-05
2016-03-10	69	0.99312	1.48569e+08	0.986288	0.993253	0.986551	0.993187	0.98642	0.993319	0.986682	1.00054	1.00035	2.00089	0.00019462	-0.00712604	0.0150978	0.000278725	0.0166951	-0.426836		1.00045	0.00010324	-9.13798e-05	0.00010255	-9.207e-05
2016-03-11	70	0.993385	1.48608e+08	0.986814	0.993518	0.987078	0.993452	0.986946	0.993585	0.987211	1.00054	1.00034	2.00089	0.00020259	-0.00686516	0.0152184	0.000278731	0.0166952	-0.411204		1.00045	0.000107093	-9.54974e-05	0.000106403	-9.61876e-05
2016-03-12	71	0.993651	1.48648e+08	0.987343	0.993786	0.98761	0.993718	0.987476	0.993853	0.987743	1.00055	1.00034	2.00089	0.000210431	-0.00660244	0.0153346	0.000278741	0.0166955	-0.395461		1.00045	0.000110808	-9.96232e-05	0.000110118	-0.000100313
2016-03-13	72	0.99392	1.48688e+08	0.987877	0.994055	0.988145	0.993987	0.988011	0.994122	0.988279	1.00055	1.00033	2.00089	0.000218021	-0.00633755	0.0154462	0.000278749	0.0166958	-0.37959		1.00045	0.000114684	-0.000103337	0.000113993	-0.000104027
2016-03-14	73	0.99419	1.48729e+08	0.988414	0.994326	0.988684	0.994258	0.988549	0.994394	0.988819	1.00056	1.00033	2.00089	0.000225421	-0.00607087	0.0155532	0.000278758	0.016696	-0.363612		1.00045	0.000118328	-0.000107093	0.000117638	-0.000107783
2016-03-15	74	0.994462	1.48769e+08	0.988954	0.994598	0.989226	0.99453	0.98909	0.994667	0.989362	1.00056	1.00033	2.00089	0.000232689	-0.00580242	0.0156556	0.000278767	0.0166963	-0.347527		1.00045	0.000121944	-0.000110745	0.000121253	-0.000111435
2016-03-16	75	0.994735	1.4881e+08	0.989498	0.994873	0.989772	0.994804	0.989635	0.994941	0.989908	1.00056	1.00032	2.00089	0.000239529	-0.00553215	0.0157535	0.000278777	0.0166966	-0.331334		1.00045	0.000125433	-0.000114096	0.000124743	-0.000114786
2016-03-17	76	0.99501	1.48851e+08	0.990045	0.995148	0.99032	0.995079	0.990183	0.995217	0.990458	1.00057	1.00032	2.00089	0.00024628	-0.00526029	0.0158466	0.000278785	0.0166969	-0.315047		1.00045	0.000128702	-0.000117577	0.000128012	-0.000118267
2016-03-18	77	0.995286	1.48893e+08	0.990595	0.995425	0.990872	0.995356	0.990733	0.995495	0.99101	1.00057	1.00032	2.00089	0.000252715	-0.00498686	0.0159351	0.000278798	0.0166972	-0.298664		1.00045	0.000131953	-0.000120762	0.000131263	-0.000121452
2016-03-19	78	0.995564	1.48934e+08	0.991148	0.995704	0.991426	0.995634	0.991287	0.995773	0.991565	1.00057	1.00031	2.00089	0.000258827	-0.00471197	0.0160188	0.000278806	0.0166975	-0.282197		1.00045	0.00013504	-0.000123787	0.00013435	-0.000124477
2016-03-20	79	0.995843	1.48976e+08	0.991703	0.995983	0.991983	0.995913	0.991843	0.996053	0.992122	1.00057	1.00031	2.00089	0.000264611	-0.00443571	0.0160979	0.000278818	0.0166979	-0.265645		1.00045	0.000137916	-0.000126696	0.000137226	-0.000127386
2016-03-21	80	0.996123	1.49018e+08	0.992262	0.996264	0.992542	0.996194	0.992402	0.996334	0.992682	1.00058	1.00031	2.00089	0.000270201	-0.00415804	0.0161723	0.000278833	0.0166983	-0.24901		1.00045	0.000140732	-0.000129469	0.000140042	-0.000130159
2016-03-22	81	0.996405	1.4906e+08	0.992822	0.996546	0.993103	0.996475	0.992963	0.996616	0.993244	1.00058	1.0003	2.00088	0.000275659	-0.0038791	0.0162418	0.000278842	0.0166986	-0.232301		1.00045	0.000143343	-0.000132316	0.000142653	-0.000133006
2016-03-23	82	0.996687	1.49102e+08	0.993385	0.996828	0.993667	0.996758	0.993526	0.996899	0.993808	1.00058	1.0003	2.00088	0.000280934	-0.00359905	0.0163065	0.000278856	0.016699	-0.215525		1.00045	0.000145901	-0.000135033	0.000145211	-0.000135723
2016-03-24	83	0.99697	1.49145e+08	0.993949	0.997112	0.994232	0.997041	0.994091	0.997183	0.994374	1.00058	1.0003	2.00088	0.000285508	-0.003318	0.0163664	0.00027887	0.0166994	-0.19869		1.00045	0.000148009	-0.000137498	0.000147319	-0.000138189
2016-03-25	84	0.997254	1.49187e+08	0.994515	0.997396	0.994799	0.997325	0.994657	0.997467	0.994941	1.00059	1.0003	2.00088	0.000290088	-0.00303583	0.0164214	0.00027888	0.0166997	-0.181789		1.00045	0.000150019	-0.000140069	0.000149328	-0.000140759
2016-03-26	85	0.997538	1.4923e+08	0.995083	0.997681	0.995368	0.99761	0.995225	0.997752	0.99551	1.00059	1.00029	2.00088	0.000294224	-0.00275285	0.0164717	0.000278894	0.0167001	-0.16484		1.00045	0.000151782	-0.000142442	0.000151092	-0.000143132
2016-03-27	86	0.997824	1.49272e+08	0.995652	0.997967	0.995937	0.997895	0.995795	0.998038	0.99608	1.00059	1.00029	2.00088	0.000297823	-0.00246902	0.016517	0.000278906	0.0167005	-0.147841		1.00045	0.000153202	-0.000144621	0.000152512	-0.000145311
2016-03-28	87	0.99811	1.49315e+08	0.996223	0.998253	0.996508	0.998181	0.996366	0.998324	0.996651	1.00059	1.00029	2.00088	0.000301338	-0.00218442	0.0165574	0.000278918	0.0167008	-0.130797		1.00044	0.000154629	-0.000146709	0.000153939	-0.000147399
2016-03-29	88	0.998396	1.49358e+08	0.996794	0.998539	0.99708	0.998467	0.996937	0.998611	0.997223	1.00059	1.00029	2.00088	0.00030442	-0.00189931	0.0165929	0.000278933	0.0167013	-0.113722		1.00044	0.000155616	-0.000148804	0.000154926	-0.000149494
2016-03-30	89	0.998682	1.49401e+08	0.997367	0.998826	0.997653	0.998754	0.99751	0.998898	0.997797	1.00059	1.00029	2.00088	0.000307403	-0.00161355	0.0166235	0.000278943	0.0167016	-0.0966107		1.00044	0.000156664	-0.000150739	0.000155973	-0.000151429
2016-03-31	90	0.998969	1.49444e+08	0.99794	0.999113	0.998227	0.999041	0.998083	0.999185	0.99837	1.00059	1.00028	2.00088	0.000309733	-0.00132727	0.0166491	0.000278954	0.0167019	-0.079468		1.00044	0.000157423	-0.00015231	0.000156732	-0.000153
2016-04-01	91	0.999257	1.49487e+08	0.998514	0.9994	0.998801	0.999328	0.998657	0.999472	0.998944	1.00059	1.00028	2.00088	0.000311865	-0.00104058	0.0166698	0.000278964	0.0167022	-0.0623021		1.00044	0.000157944	-0.000153921	0.000157254	-0.000154611
2016-04-02	92	0.999544	1.4953e+08	0.999088	0.999687	0.999375	0.999616	0.999231	0.999759	0.999518	1.0006	1.00028	2.00088	0.000315419	-0.000753849	0.0166865	0.000279006	0.0167035	-0.0451313		1.00044	0.000158331	-0.000157088	0.00015764	-0.000157778
2016-04-03	93	0.999831	1.49573e+08	0.999662	0.999975	0.999949	0.999903	0.999806	1.00005	1.00009	1.0006	1.00028	2.00087	0.000316467	-0.000466789	0.016697	0.000279007	0.0167035	-0.0279456		1.00044	0.000158631	-0.000157837	0.00015794	-0.000158527
2016-04-04	94	1.00012	1.49616e+08	1.00024	1.00026	1.00052	1.00019	1.00038	1.00033	1.00067	1.0006	1.00028	2.00087	0.000316056	-0.000179453	0.0167023	0.000278997	0.0167032	-0.0107436		1.00044	0.000158545	-0.000157511	0.000157855	-0.000158201
2016-04-05	95	1.00041	1.49659e+08	1.00081	1.00055	1.0011	1.00048	1.00095	1.00062	1.00124	1.0006	1.00028	2.00088	0.000315427	0.000107732	0.0167025	0.000278985	0.0167028	0.00644993		1.00044	0.000158324	-0.000157103	0.000157634	-0.000157793
2016-04-06	96	1.00069	1.49701e+08	1.00138	1.00084	1.00167	1.00076	1.00153	1.00091	1.00182	1.0006	1.00028	2.00088	0.000314726	0.000394867	0.0166979	0.000278975	0.0167025	0.0236412		1.00044	0.000158168	-0.000156558	0.000157478	-0.000157248
2016-04-07	97	1.00098	1.49744e+08	1.00196	1.00112	1.00225	1.00105	1.0021	1.00119	1.00239	1.00059	1.00028	2.00088	0.000313629	0.000681978	0.0166883	0.000278965	0.0167022	0.0408315		1.00044	0.000157827	-0.000155802	0.000157137	-0.000156492
2016-04-08	98	1.00127	1.49787e+08	1.00253	1.00141	1.00282	1.00134	1.00267	1.00148	1.00296	1.00059	1.00028	2.00088	0.000312112	0.000968912	0.0166738	0.000278954	0.0167019	0.0580121		1.00044	0.0001572	-0.000154912	0.00015651	-0.000155602
2016-04-09	99	1.00155	1.4983e+08	1.0031	1.00169	1.00339	1.00162	1.00325	1.00176	1.00353	1.00059	1.00028	2.00088	0.000309772	0.00125545	0.0166544	0.000278944	0.0167016	0.0751691		1.00044	0.000156137	-0.000153635	0.000155447	-0.000154325
2016-04-10	100	1.00184	1.49873e+08	1.00368	1.00198	1.00396	1.00191	1.00382	1.00205	1.0041	1.00059	1.00028	2.00088	0.000307905	0.00154165	0.0166301	0.000278937	0.0167014	0.0923069		1.00044	0.000155487	-0.000152418	0.000154796	-0.000153108
2016-04-11	101	1.00212	1.49915e+08	1.00425	1.00226	1.00453	1.00219	1.00439	1.00233	1.00467	1.00059	1.00029	2.00088	0.000305544	0.00182739	0.0166007	0.000278922	0.016701	0.109418		1.00044	0.000154548	-0.000150996	0.000153858	-0.000151686
2016-04-12	102	1.0024	1.49958e+08	1.00482	1.00255	1.0051	1.00248	1.00496	1.00262	1.00524	1.00059	1.00029	2.00088	0.000302575	0.00211257	0.0165665	0.000278913	0.0167007	0.126496		1.00044	0.00015327	-0.000149305	0.00015258	-0.000149995
2016-04-13	103	1.00269	1.5e+08	1.00538	1.00283	1.00567	1.00276	1.00553	1.0029	1.00581	1.00059	1.00029	2.00088	0.00029945	0.00239717	0.0165275	0.000278904	0.0167004	0.14354		1.00044	0.000152102	-0.000147348	0.000151412	-0.000148038
2016-04-14	104	1.00297	1.50042e+08	1.00595	1.00311	1.00623	1.00304	1.00609	1.00318	1.00637	1.00059	1.00029	2.00088	0.000296016	0.0026811	0.0164836	0.000278896	0.0167002	0.160543		1.00044	0.000150843	-0.000145173	0.000150152	-0.000145863
2016-04-15	105	1.00325	1.50084e+08	1.00651	1.00339	1.0068	1.00332	1.00666	1.00346	1.00694	1.00059	1.00029	2.00088	0.000292022	0.00296411	0.0164347	0.000278884	0.0166998	0.177493		1.00044	0.000149188	-0.000142834	0.000148498	-0.000143524
2016-04-16	106	1.00353	1.50126e+08	1.00708	1.00367	1.00736	1.0036	1.00722	1.00374	1.0075	1.00058	1.0003	2.00088	0.000287934	0.00324636	0.016381	0.000278877	0.0166996	0.194397		1.00044	0.000147589	-0.000140345	0.000146899	-0.000141035
2016-04-17	107	1.00381	1.50168e+08	1.00764	1.00395	1.00792	1.00388	1.00778	1.00402	1.00806	1.00058	1.0003	2.00088	0.000283252	0.00352763	0.0163225	0.000278869	0.0166994	0.211243		1.00045	0.000145693	-0.00013756	0.000145002	-0.00013825
2016-04-18	108	1.00409	1.5021e+08	1.0082	1.00423	1.00847	1.00416	1.00834	1.0043	1.00861	1.00058	1.0003	2.00088	0.00027835	0.00380798	0.0162591	0.000278858	0.016699	0.228036		1.00045	0.000143797	-0.000134553	0.000143107	-0.000135243
2016-04-19	109	1.00437	1.50251e+08	1.00875	1.0045	1.00903	1.00444	1.00889	1.00457	1.00917	1.00058	1.00031	2.00088	0.000273165	0.00408722	0.0161909	0.000278851	0.0166988	0.244761		1.00045	0.000141649	-0.000131516	0.000140959	-0.000132206
2016-04-20	110	1.00464	1.50292e+08	1.00931	1.00478	1.00958	1.00471	1.00944	1.00485	1.00972	1.00058	1.00031	2.00089	0.000267674	0.00436519	0.0161179	0.00027884	0.0166985	0.261412		1.00045	0.000139396	-0.000128278	0.000138706	-0.000128968
2016-04-21	111	1.00492	1.50333e+08	1.00986	1.00505	1.01013	1.00498	1.00999	1.00512	1.01027	1.00057	1.00031	2.00089	0.000261767	0.00464173	0.01604	0.000278826	0.0166981	0.27798		1.00045	0.000136734	-0.000125033	0.000136044	-0.000125723
2016-04-22	112	1.00519	1.50374e+08	1.01041	1.00532	1.01068	1.00526	1.01054	1.00539	1.01081	1.00057	1.00032	2.00089	0.000255893	0.00491712	0.0159573	0.000278814	0.0166977	0.294478		1.00045	0.000134314	-0.000121579	0.000133624	-0.000122269
2016-04-23	113	1.00546	1.50415e+08	1.01095	1.00559	1.01122	1.00553	1.01109	1.00566	1.01136	1.00057	1.00032	2.00089	0.000249613	0.00519098	0.01587	0.000278804	0.0166974	0.310885		1.00045	0.000131479	-0.000118134	0.000130789	-0.000118824
2016-04-24	114	1.00573	1.50455e+08	1.01149	1.00586	1.01176	1.0058	1.01163	1.00593	1.0119	1.00057	1.00032	2.00089	0.000242749	0.00546336	0.015778	0.000278795	0.0166972	0.327203		1.00045	0.000128328	-0.000114421	0.000127638	-0.000115111
2016-04-25	115	1.006	1.50495e+08	1.01203	1.00613	1.0123	1.00606	1.01216	1.0062	1.01243	1.00056	1.00033	2.00089	0.000235622	0.00573412	0.0156813	0.000278784	0.0166968	0.343426		1.00045	0.000125157	-0.000110465	0.000124467	-0.000111155
2016-04-26	116	1.00626	1.50535e+08	1.01257	1.00639	1.01283	1.00633	1.0127	1.00646	1.01296	1.00056	1.00033	2.00089	0.000228347	0.00600314	0.0155799	0.000278772	0.0166965	0.359545		1.00045	0.000121761	-0.000106585	0.000121071	-0.000107276
2016-04-27	117	1.00653	1.50574e+08	1.0131	1.00666	1.01336	1.00659	1.01323	1.00672	1.01349	1.00056	1.00033	2.00089	0.000220739	0.00627039	0.015474	0.000278764	0.0166962	0.375558		1.00045	0.000118038	-0.000102701	0.000117348	-0.000103391
2016-04-28	118	1.00679	1.50613e+08	1.01362	1.00692	1.01388	1.00685	1.01375	1.00698	1.01402	1.00055	1.00034	2.00089	0.000213195	0.00653581	0.0153635	0.000278753	0.0166959	0.391462		1.00045	0.000114284	-9.89114e-05	0.000113594	-9.96016e-05
2016-04-29	119	1.00705	1.50652e+08	1.01415	1.00718	1.01441	1.00711	1.01428	1.00724	1.01453	1.00055	1.00034	2.00089	0.00020533	0.00679925	0.0152483	0.000278742	0.0166956	0.407249		1.00045	0.000110394	-9.49366e-05	0.000109704	-9.56267e-05
2016-04-30	120	1.00731	1.50691e+08	1.01466	1.00743	1.01492	1.00737	1.01479	1.0075	1.01505	1.00054	1.00035	2.00089	0.000196983	0.00706067	0.0151288	0.000278732	0.0166953	0.422914		1.00045	0.000106263	-9.07198e-05	0.000105573	-9.14099e-05
2016-05-01	121	1.00756	1.50729e+08	1.01518	1.00769	1.01543	1.00762	1.01531	1.00775	1.01556	1.00054	1.00035	2.00089	0.000188826	0.00732003	0.0150046	0.000278722	0.016695	0.438457		1.00045	0.00010214	-8.66863e-05	0.00010145	-8.73764e-05
2016-05-02	122	1.00781	1.50767e+08	1.01569	1.00794	1.01594	1.00788	1.01582	1.008	1.01607	1.00053	1.00035	2.00089	0.000180195	0.00757728	0.0148762	0.000278715	0.0166948	0.453872		1.00045	9.7919e-05	-8.22759e-05	9.72289e-05	-8.2966e-05
2016-05-03	123	1.00806	1.50804e+08	1.01619	1.00819	1.01645	1.00813	1.01632	1.00825	1.01657	1.00053	1.00036	2.00089	0.000171382	0.00783221	0.0147432	0.000278707	0.0166945	0.469149		1.00045	9.3444e-05	-7.79383e-05	9.27538e-05	-7.86285e-05
2016-05-04	124	1.00831	1.50841e+08	1.0167	1.00844	1.01694	1.00837	1.01682	1.0085	1.01707	1.00053	1.00036	2.00089	0.000162577	0.00808469	0.014606	0.000278697	0.0166942	0.484281		1.00045	8.89593e-05	-7.36178e-05	8.82691e-05	-7.43079e-05
2016-05-05	125	1.00856	1.50878e+08	1.01719	1.00868	1.01744	1.00862	1.01731	1.00874	1.01756	1.00052	1.00037	2.00089	0.000153166	0.00833468	0.0144645	0.00027869	0.016694	0.499262		1.00045	8.41107e-05	-6.90549e-05	8.34206e-05	-6.97451e-05
2016-05-06	126	1.0088	1.50915e+08	1.01768	1.00892	1.01792	1.00886	1.0178	1.00898	1.01805	1.00052	1.00037	2.00089	0.000144131	0.00858257	0.0143186	0.000278684	0.0166938	0.514116		1.00045	7.95512e-05	-6.45794e-05	7.88611e-05	-6.52696e-05
2016-05-07	127	1.00904	1.50951e+08	1.01817	1.00916	1.01841	1.0091	1.01829	1.00922	1.01853	1.00051	1.00038	2.00089	0.00013457	0.00882769	0.0141686	0.000278677	0.0166936	0.528806		1.00045	7.46155e-05	-5.99542e-05	7.39254e-05	-6.06444e-05
2016-05-08	128	1.00928	1.50986e+08	1.01865	1.0094	1.01888	1.00934	1.01877	1.00946	1.019	1.00051	1.00038	2.00089	0.000125278	0.0090702	0.0140144	0.000278672	0.0166935	0.543339		1.00045	6.99529e-05	-5.53256e-05	6.92628e-05	-5.60157e-05
2016-05-09	129	1.00952	1.51021e+08	1.01912	1.00963	1.01936	1.00957	1.01924	1.00969	1.01947	1.0005	1.00039	2.00089	0.000115674	0.00931013	0.013856	0.000278668	0.0166934	0.557715		1.00045	6.531e-05	-5.03643e-05	6.46198e-05	-5.10545e-05
2016-05-10	130	1.00975	1.51056e+08	1.01959	1.00986	1.01982	1.00981	1.01971	1.00992	1.01994	1.0005	1.00039	2.00089	0.000105714	0.00954709	0.0136936	0.000278662	0.0166932	0.571916		1.00045	6.00753e-05	-4.56384e-05	5.93851e-05	-4.63285e-05
2016-05-11	131	1.00998	1.51091e+08	1.02006	1.01009	1.02028	1.01003	1.02017	1.01015	1.0204	1.00049	1.0004	2.00089	9.61497e-05	0.00978149	0.0135271	0.000278659	0.0166931	0.58596		1.00045	5.54031e-05	-4.07466e-05	5.4713e-05	-4.14367e-05
2016-05-12	132	1.0102	1.51124e+08	1.02051	1.01032	1.02074	1.01026	1.02063	1.01037	1.02085	1.00049	1.0004	2.00089	8.62338e-05	0.0100129	0.0133567	0.00027866	0.0166931	0.599824		1.00045	5.06818e-05	-3.5552e-05	4.99917e-05	-3.62421e-05
2016-05-13	133	1.01043	1.51158e+08	1.02097	1.01054	1.02119	1.01048	1.02108	1.01059	1.0213	1.00048	1.00041	2.00089	7.61362e-05	0.0102413	0.0131822	0.000278655	0.0166929	0.61351		1.00045	4.58042e-05	-3.03321e-05	4.5114e-05	-3.10222e-05
2016-05-14	134	1.01065	1.51191e+08	1.02141	1.01076	1.02163	1.0107	1.02152	1.01081	1.02174	1.00048	1.00041	2.00089	6.57171e-05	0.0104666	0.0130039	0.00027865	0.0166928	0.627009		1.00045	4.07164e-05	-2.50006e-05	4.00263e-05	-2.56907e-05
2016-05-15	135	1.01087	1.51223e+08	1.02185	1.01097	1.02207	1.01092	1.02196	1.01103	1.02218	1.00047	1.00042	2.00089	5.57992e-05	0.0106889	0.0128217	0.000278648	0.0166928	0.640332		1.00045	3.58683e-05	-1.99308e-05	3.51782e-05	-2.0621e-05
2016-05-16	136	1.01108	1.51256e+08	1.02228	1.01119	1.0225	1.01113	1.02239	1.01124	1.0226	1.00047	1.00042	2.00089	4.5388e-05	0.0109081	0.0126357	0.000278647	0.0166927	0.653462		1.00045	3.08987e-05	-1.44893e-05	3.02086e-05	-1.51795e-05
2016-05-17	137	1.01129	1.51287e+08	1.02271	1.0114	1.02292	1.01134	1.02282	1.01145	1.02303	1.00046	1.00043	2.00089	3.51782e-05	0.0111241	0.012446	0.000278648	0.0166928	0.666402		1.00045	2.61563e-05	-9.02188e-06	2.54662e-05	-9.71201e-06
2016-05-18	138	1.0115	1.51318e+08	1.02313	1.0116	1.02334	1.01155	1.02323	1.01165	1.02344	1.00046	1.00043	2.00089	2.47773e-05	0.0113367	0.0122526	0.000278646	0.0166927	0.679141		1.00045	2.10796e-05	-3.69774e-06	2.03895e-05	-4.38788e-06
2016-05-19	139	1.0117	1.51349e+08	1.02355	1.0118	1.02375	1.01175	1.02365	1.01185	1.02385	1.00045	1.00044	2.00089	1.43827e-05	0.0115461	0.0120554	0.000278646	0.0166927	0.691686		1.00046	1.62195e-05	1.83681e-06	1.55293e-05	1.14667e-06
2016-05-20	140	1.01191	1.51379e+08	1.02395	1.012	1.02415	1.01195	1.02405	1.01205	1.02425	1.00045	1.00044	2.00089	3.74866e-06	0.0117519	0.0118548	0.000278644	0.0166926	0.70402		1.00046	1.10636e-05	7.31498e-06	1.03735e-05	6.62485e-06
2016-05-21	141	1.0121	1.51408e+08	1.02435	1.0122	1.02455	1.01215	1.02445	1.01225	1.02465	1.00044	1.00045	2.00089	-6.52547e-06	0.0119546	0.0116506	0.000278648	0.0166927	0.716155		1.00046	6.31618e-06	1.28416e-05	5.62605e-06	1.21515e-05
2016-05-22	142	1.0123	1.51437e+08	1.02475	1.01239	1.02494	1.01234	1.02484	1.01244	1.02503	1.00044	1.00046	2.00089	-1.73378e-05	0.0121535	0.0114429	0.000278649	0.0166928	0.728071		1.00046	9.60886e-07	1.82987e-05	2.70755e-07	1.76086e-05
2016-05-23	143	1.01249	1.51466e+08	1.02513	1.01258	1.02532	1.01253	1.02522	1.01263	1.02541	1.00043	1.00046	2.00089	-2.79991e-05	0.0123488	0.011232	0.00027865	0.0166928	0.739766		1.00046	-4.40655e-06	2.35926e-05	-5.09668e-06	2.29024e-05
2016-05-24	144	1.01267	1.51494e+08	1.02551	1.01277	1.02569	1.01272	1.0256	1.01281	1.02579	1.00043	1.00047	2.00089	-3.83573e-05	0.0125406	0.0110175	0.000278652	0.0166929	0.751253		1.00046	-9.48417e-06	2.88731e-05	-1.01743e-05	2.8183e-05
2016-05-25	145	1.01286	1.51521e+08	1.02588	1.01295	1.02606	1.0129	1.02597	1.01299	1.02615	1.00042	1.00047	2.00089	-4.90607e-05	0.0127286	0.0107999	0.000278656	0.016693	0.762513		1.00046	-1.4733e-05	3.43277e-05	-1.54231e-05	3.36376e-05
2016-05-26	146	1.01304	1.51548e+08	1.02624	1.01312	1.02642	1.01308	1.02633	1.01317	1.02651	1.00042	1.00048	2.00089	-5.97194e-05	0.0129128	0.0105791	0.000278657	0.016693	0.773545		1.00046	-2.00611e-05	3.96583e-05	-2.07512e-05	3.89682e-05
2016-05-27	147	1.01321	1.51574e+08	1.0266	1.0133	1.02677	1.01325	1.02669	1.01334	1.02686	1.00041	1.00048	2.00089	-6.9867e-05	0.0130932	0.0103551	0.00027866	0.0166931	0.784348		1.00046	-2.52701e-05	4.45969e-05	-2.59602e-05	4.39068e-05
2016-05-28	148	1.01338	1.516e+08	1.02695	1.01347	1.02712	1.01343	1.02703	1.01351	1.0272	1.00041	1.00049	2.00089	-8.01189e-05	0.0132697	0.0101281	0.000278661	0.0166932	0.794916		1.00046	-3.05694e-05	4.95495e-05	-3.12595e-05	4.88593e-05
2016-05-29	149	1.01355	1.51625e+08	1.02729	1.01363	1.02745	1.01359	1.02737	1.01367	1.02753	1.0004	1.00049	2.00089	-9.02288e-05	0.0134423	0.00989806	0.000278667	0.0166933	0.80525		1.00046	-3.57579e-05	5.44709e-05	-3.6448e-05	5.37808e-05
2016-05-30	150	1.01371	1.5165e+08	1.02762	1.01379	1.02778	1.01375	1.0277	1.01383	1.02786	1.0004	1.0005	2.00089	-0.000100086	0.013611	0.00966505	0.000278671	0.0166935	0.815347		1.00046	-4.09955e-05	5.90902e-05	-4.16857e-05	5.84001e-05
2016-05-31	151	1.01387	1.51673e+08	1.02794	1.01395	1.0281	1.01391	1.02802	1.01399	1.02818	1.00039	1.0005	2.00089	-0.000110253	0.0137756	0.00942928	0.000278678	0.0166937	0.825199		1.00045	-4.62371e-05	6.40163e-05	-4.69273e-05	6.33262e-05
2016-06-01	152	1.01403	1.51697e+08	1.02826	1.01411	1.02841	1.01407	1.02833	1.01414	1.02849	1.00039	1.00051	2.00089	-0.000120521	0.013936	0.00919075	0.000278681	0.0166937	0.834802		1.00045	-5.18429e-05	6.86778e-05	-5.25331e-05	6.79877e-05
2016-06-02	153	1.01418	1.51719e+08	1.02857	1.01426	1.02871	1.01422	1.02864	1.01429	1.02879	1.00038	1.00051	2.00089	-0.000129863	0.0140924	0.00894949	0.000278689	0.016694	0.84416		1.00045	-5.66084e-05	7.32543e-05	-5.72986e-05	7.25642e-05
2016-06-03	154	1.01433	1.51742e+08	1.02886	1.0144	1.02901	1.01437	1.02894	1.01444	1.02908	1.00038	1.00051	2.00089	-0.00013917	0.0142446	0.00870546	0.000278692	0.0166941	0.85327		1.00045	-6.15461e-05	7.76241e-05	-6.22362e-05	7.6934e-05
2016-06-04	155	1.01447	1.51763e+08	1.02915	1.01454	1.0293	1.01451	1.02923	1.01458	1.02937	1.00037	1.00052	2.00089	-0.000148786	0.0143923	0.00845908	0.000278696	0.0166942	0.862118		1.00045	-6.68132e-05	8.19732e-05	-6.75034e-05	8.12831e-05
2016-06-05	156	1.01461	1.51784e+08	1.02944	1.01468	1.02957	1.01465	1.02951	1.01471	1.02964	1.00037	1.00052	2.00089	-0.000157733	0.014536	0.00821011	0.000278702	0.0166944	0.870714		1.00045	-7.15065e-05	8.62263e-05	-7.21967e-05	8.55362e-05
2016-06-06	157	1.01475	1.51804e+08	1.02971	1.01481	1.02984	1.01478	1.02978	1.01485	1.02991	1.00036	1.00053	2.00089	-0.000166649	0.0146754	0.00795866	0.000278707	0.0166945	0.879054		1.00045	-7.62847e-05	9.03639e-05	-7.69748e-05	8.96737e-05
2016-06-07	158	1.01488	1.51824e+08	1.02998	1.01494	1.03011	1.01491	1.03004	1.01497	1.03017	1.00036	1.00053	2.00089	-0.000175218	0.0148105	0.00770489	0.000278716	0.0166948	0.887132		1.00045	-8.08006e-05	9.44172e-05	-8.14907e-05	9.37271e-05
2016-06-08	159	1.015	1.51842e+08	1.03023	1.01507	1.03036	1.01503	1.0303	1.0151	1.03042	1.00035	1.00054	2.00089	-0.000183884	0.014941	0.007449	0.000278722	0.016695	0.894942		1.00045	-8.53158e-05	9.85678e-05	-8.6006e-05	9.78776e-05
2016-06-09	160	1.01513	1.51861e+08	1.03048	1.01519	1.0306	1.01516	1.03054	1.01521	1.03066	1.00035	1.00054	2.00089	-0.000192374	0.0150671	0.00719089	0.000278727	0.0166951	0.902486		1.00045	-8.97818e-05	0.000102592	-9.04719e-05	0.000101902
2016-06-10	161	1.01524	1.51878e+08	1.03072	1.0153	1.03084	1.01527	1.03078	1.01533	1.03089	1.00034	1.00054	2.00089	-0.000200241	0.0151889	0.00693049	0.000278733	0.0166953	0.909768		1.00045	-9.38973e-05	0.000106343	-9.45874e-05	0.000105653
2016-06-11	162	1.01536	1.51895e+08	1.03095	1.01541	1.03106	1.01538	1.03101	1.01544	1.03112	1.00034	1.00055	2.00089	-0.000208202	0.0153061	0.00666825	0.000278742	0.0166956	0.916776		1.00045	-9.80716e-05	0.000110131	-9.87618e-05	0.00010944
2016-06-12	163	1.01547	1.51912e+08	1.03117	1.01552	1.03128	1.01549	1.03123	1.01555	1.03133	1.00034	1.00055	2.00089	-0.000215834	0.0154189	0.00640391	0.000278751	0.0166958	0.923515		1.00045	-0.000101856	0.000113978	-0.000102546	0.000113288
2016-06-13	164	1.01557	1.51927e+08	1.03139	1.01562	1.03149	1.0156	1.03144	1.01565	1.03154	1.00033	1.00055	2.00089	-0.000223174	0.015527	0.00613765	0.000278759	0.0166961	0.92998		1.00045	-0.000105557	0.000117617	-0.000106247	0.000116927
2016-06-14	165	1.01567	1.51942e+08	1.03159	1.01572	1.03169	1.0157	1.03164	1.01574	1.03173	1.00033	1.00056	2.00089	-0.000230607	0.0156306	0.00586966	0.000278768	0.0166963	0.936168		1.00045	-0.00010933	0.000121278	-0.00011002	0.000120588
2016-06-15	166	1.01577	1.51957e+08	1.03178	1.01581	1.03188	1.01579	1.03183	1.01584	1.03192	1.00032	1.00056	2.00089	-0.000237408	0.0157296	0.00559983	0.000278779	0.0166967	0.942081		1.00045	-0.000112622	0.000124786	-0.000113312	0.000124096
2016-06-16	167	1.01586	1.5197e+08	1.03197	1.0159	1.03206	1.01588	1.03201	1.01592	1.0321	1.00032	1.00057	2.00089	-0.00024427	0.0158239	0.00532835	0.000278786	0.0166969	0.947713		1.00045	-0.000116198	0.000128072	-0.000116888	0.000127382
2016-06-17	168	1.01595	1.51983e+08	1.03214	1.01599	1.03223	1.01597	1.03219	1.01601	1.03227	1.00032	1.00057	2.00089	-0.000250688	0.0159136	0.00505532	0.000278799	0.0166973	0.953066		1.00045	-0.000119348	0.00013134	-0.000120038	0.00013065
2016-06-18	169	1.01603	1.51996e+08	1.03231	1.01607	1.03239	1.01605	1.03235	1.01609	1.03243	1.00031	1.00057	2.00089	-0.000256931	0.0159985	0.00478079	0.000278808	0.0166975	0.958135		1.00045	-0.000122488	0.000134443	-0.000123178	0.000133753
2016-06-19	170	1.0161	1.52007e+08	1.03247	1.01614	1.03254	1.01612	1.03251	1.01616	1.03258	1.00031	1.00057	2.00089	-0.000262798	0.0160787	0.00450487	0.000278819	0.0166979	0.96292		1.00045	-0.000125414	0.000137384	-0.000126104	0.000136693
2016-06-20	171	1.01618	1.52018e+08	1.03262	1.01621	1.03269	1.01619	1.03265	1.01623	1.03272	1.00031	1.00058	2.00089	-0.000268315	0.0161543	0.00422754	0.000278835	0.0166983	0.967421		1.00045	-0.000128125	0.00014019	-0.000128815	0.000139499
2016-06-21	172	1.01625	1.52028e+08	1.03276	1.01628	1.03282	1.01626	1.03279	1.01629	1.03285	1.00031	1.00058	2.00089	-0.0002739	0.016225	0.00394893	0.000278845	0.0166986	0.971636		1.00045	-0.000131036	0.000142864	-0.000131726	0.000142174
2016-06-22	173	1.01631	1.52038e+08	1.03288	1.01634	1.03294	1.01632	1.03291	1.01635	1.03297	1.0003	1.00058	2.00089	-0.000279152	0.0162909	0.00366912	0.000278856	0.016699	0.975563		1.00045	-0.000133792	0.00014536	-0.000134482	0.00014467
2016-06-23	174	1.01637	1.52047e+08	1.033	1.0164	1.03306	1.01638	1.03303	1.01641	1.03309	1.0003	1.00058	2.00089	-0.000283924	0.0163521	0.00338837	0.000278872	0.0166995	0.979199		1.00045	-0.000136243	0.000147681	-0.000136933	0.000146991
2016-06-24	175	1.01642	1.52055e+08	1.03311	1.01645	1.03316	1.01643	1.03314	1.01646	1.03319	1.0003	1.00059	2.00088	-0.000288453	0.0164083	0.00310642	0.000278882	0.0166998	0.982547		1.00045	-0.000138851	0.000149602	-0.000139542	0.000148912
2016-06-25	176	1.01647	1.52062e+08	1.03322	1.01649	1.03326	1.01648	1.03324	1.01651	1.03328	1.0003	1.00059	2.00088	-0.000292737	0.0164597	0.00282367	0.000278895	0.0167001	0.985602		1.00045	-0.000141261	0.000151477	-0.000141951	0.000150787
2016-06-26	177	1.01652	1.52069e+08	1.03331	1.01654	1.03335	1.01653	1.03333	1.01655	1.03337	1.00029	1.00059	2.00088	-0.000296433	0.0165062	0.00254004	0.000278908	0.0167005	0.988366		1.00045	-0.000143475	0.000152957	-0.000144165	0.000152267
2016-06-27	178	1.01656	1.52075e+08	1.03339	1.01657	1.03342	1.01657	1.03341	1.01658	1.03344	1.00029	1.00059	2.00088	-0.000299943	0.0165479	0.00225561	0.00027892	0.0167009	0.990838		1.00045	-0.000145599	0.000154345	-0.000146289	0.000153655
2016-06-28	179	1.01659	1.5208e+08	1.03346	1.01661	1.03349	1.0166	1.03347	1.01661	1.0335	1.00029	1.00059	2.00088	-0.000303095	0.0165847	0.00197064	0.000278935	0.0167013	0.993014		1.00044	-0.000147628	0.000155467	-0.000148319	0.000154777
2016-06-29	180	1.01662	1.52084e+08	1.03352	1.01663	1.03355	1.01663	1.03353	1.01664	1.03356	1.00029	1.00059	2.00088	-0.000306173	0.0166164	0.00168502	0.000278945	0.0167016	0.994898		1.00044	-0.000149724	0.000156449	-0.000150414	0.000155759
2016-06-30	181	1.01665	1.52088e+08	1.03357	1.01666	1.03359	1.01665	1.03358	1.01666	1.0336	1.00029	1.00059	2.00088	-0.000308621	0.0166433	0.0013989	0.000278957	0.016702	0.996486		1.00044	-0.000151278	0.000157343	-0.000151968	0.000156653
2016-07-01	182	1.01667	1.52091e+08	1.03361	1.01668	1.03363	1.01667	1.03362	1.01668	1.03364	1.00028	1.00059	2.00088	-0.000310772	0.0166652	0.00111227	0.000278966	0.0167023	0.99778		1.00044	-0.000152949	0.000157824	-0.000153639	0.000157134
2016-07-02	183	1.01668	1.52094e+08	1.03365	1.01669	1.03366	1.01669	1.03365	1.01669	1.03366	1.00028	1.0006	2.00088	-0.000313753	0.0166829	0.000825545	0.000278999	0.0167033	0.998778		1.00044	-0.000155509	0.000158244	-0.000156199	0.000157554
2016-07-03	184	1.0167	1.52095e+08	1.03367	1.0167	1.03368	1.0167	1.03367	1.0167	1.03368	1.00028	1.0006	2.00088	-0.000315979	0.0166951	0.000538598	0.000279015	0.0167037	0.99948		1.00044	-0.000157351	0.000158628	-0.000158041	0.000157938
2016-07-04	185	1.0167	1.52096e+08	1.03368	1.0167	1.03368	1.0167	1.03368	1.0167	1.03369	1.00028	1.0006	2.00088	-0.000315535	0.0167016	0.000251312	0.000279005	0.0167034	0.999887		1.00044	-0.000156934	0.000158601	-0.000157624	0.000157911
2016-07-05	186	1.0167	1.52097e+08	1.03369	1.0167	1.03368	1.0167	1.03368	1.0167	1.03368	1.00028	1.0006	2.00088	-0.000314949	0.016703	-3.59607e-05	0.000278993	0.0167031	0.999998		1.00044	-0.000156635	0.000158314	-0.000157325	0.000157624
2016-07-06	187	1.0167	1.52096e+08	1.03368	1.0167	1.03367	1.0167	1.03368	1.01669	1.03367	1.00028	1.0006	2.00088	-0.000314341	0.0166996	-0.000323059	0.000278982	0.0167027	0.999813		1.00044	-0.000156099	0.000158242	-0.000156789	0.000157552
2016-07-07	188	1.01669	1.52095e+08	1.03366	1.01669	1.03365	1.01669	1.03366	1.01668	1.03364	1.00028	1.00059	2.00088	-0.000313261	0.0166913	-0.000610206	0.000278973	0.0167025	0.999332		1.00044	-0.000155376	0.000157885	-0.000156066	0.000157195
2016-07-08	189	1.01668	1.52093e+08	1.03364	1.01667	1.03362	1.01668	1.03363	1.01667	1.03361	1.00028	1.00059	2.00088	-0.000311938	0.016678	-0.000897166	0.000278961	0.0167021	0.998556		1.00044	-0.000154571	0.000157367	-0.000155261	0.000156677
2016-07-09	190	1.01666	1.52091e+08	1.0336	1.01665	1.03358	1.01666	1.03359	1.01665	1.03357	1.00028	1.00059	2.00088	-0.000309715	0.0166598	-0.00118384	0.000278951	0.0167018	0.997485		1.00044	-0.000153378	0.000156337	-0.000154068	0.000155647
2016-07-10	191	1.01664	1.52087e+08	1.03356	1.01663	1.03353	1.01663	1.03354	1.01662	1.03352	1.00028	1.00059	2.00088	-0.000307616	0.0166368	-0.00147013	0.000278944	0.0167016	0.996118		1.00044	-0.000152045	0.000155571	-0.000152735	0.000154881
2016-07-11	192	1.01661	1.52083e+08	1.0335	1.0166	1.03347	1.01661	1.03349	1.01659	1.03346	1.00029	1.00059	2.00088	-0.000305599	0.0166086	-0.00175595	0.00027893	0.0167012	0.994457		1.00044	-0.000150832	0.000154767	-0.000151522	0.000154077
2016-07-12	193	1.01658	1.52079e+08	1.03344	1.01656	1.0334	1.01657	1.03342	1.01655	1.03338	1.00029	1.00059	2.00088	-0.000302627	0.0165757	-0.00204131	0.000278919	0.0167009	0.992502		1.00044	-0.000149127	0.0001535	-0.000149817	0.000152809
2016-07-13	194	1.01655	1.52073e+08	1.03337	1.01653	1.03332	1.01654	1.03334	1.01652	1.0333	1.00029	1.00059	2.00088	-0.000299597	0.0165378	-0.00232605	0.00027891	0.0167006	0.990253		1.00044	-0.00014728	0.000152317	-0.00014797	0.000151627
2016-07-14	195	1.0165	1.52067e+08	1.03328	1.01648	1.03324	1.01649	1.03326	1.01647	1.03321	1.00029	1.00059	2.00088	-0.000296158	0.0164952	-0.00261016	0.000278903	0.0167004	0.987711		1.00044	-0.000145091	0.000151068	-0.000145781	0.000150377
2016-07-15	196	1.01646	1.5206e+08	1.03319	1.01643	1.03314	1.01645	1.03316	1.01642	1.03311	1.00029	1.00059	2.00088	-0.000292362	0.0164475	-0.0028934	0.000278892	0.0167001	0.984877		1.00044	-0.000142862	0.0001495	-0.000143552	0.00014881
2016-07-16	197	1.01641	1.52053e+08	1.03309	1.01638	1.03303	1.01639	1.03306	1.01637	1.033	1.0003	1.00058	2.00088	-0.000288273	0.016395	-0.00317584	0.000278883	0.0166998	0.981751		1.00044	-0.000140386	0.000147887	-0.000141076	0.000147197
2016-07-17	198	1.01635	1.52044e+08	1.03297	1.01632	1.03291	1.01634	1.03294	1.01631	1.03288	1.0003	1.00058	2.00088	-0.000283714	0.0163378	-0.00345736	0.000278876	0.0166996	0.978334		1.00045	-0.000137662	0.000146052	-0.000138352	0.000145362
2016-07-18	199	1.01629	1.52035e+08	1.03285	1.01626	1.03279	1.01628	1.03282	1.01625	1.03276	1.0003	1.00058	2.00088	-0.000278886	0.0162755	-0.00373795	0.000278865	0.0166993	0.974626		1.00045	-0.000134743	0.000144144	-0.000135433	0.000143454
2016-07-19	200	1.01623	1.52026e+08	1.03272	1.01619	1.03265	1.01621	1.03269	1.01618	1.03262	1.00031	1.00058	2.00088	-0.000273729	0.0162085	-0.00401747	0.000278857	0.016699	0.970629		1.00045	-0.00013167	0.000142059	-0.00013236	0.000141369
2016-07-20	201	1.01616	1.52015e+08	1.03258	1.01612	1.03251	1.01614	1.03254	1.0161	1.03247	1.00031	1.00058	2.00089	-0.000268264	0.0161367	-0.00429579	0.000278848	0.0166987	0.966344		1.00045	-0.000128493	0.000139771	-0.000129184	0.00013908
2016-07-21	202	1.01609	1.52004e+08	1.03243	1.01605	1.03235	1.01607	1.03239	1.01603	1.03231	1.00031	1.00057	2.00089	-0.000262538	0.01606	-0.00457265	0.000278834	0.0166983	0.961776		1.00045	-0.000125264	0.000137273	-0.000125954	0.000136583
2016-07-22	203	1.01601	1.51993e+08	1.03227	1.01597	1.03219	1.01599	1.03223	1.01595	1.03215	1.00032	1.00057	2.00089	-0.000256593	0.0159786	-0.00484837	0.000278822	0.016698	0.956918		1.00045	-0.000121875	0.000134718	-0.000122565	0.000134028
2016-07-23	204	1.01592	1.5198e+08	1.0321	1.01588	1.03201	1.0159	1.03206	1.01586	1.03197	1.00032	1.00057	2.00089	-0.000250472	0.0158924	-0.00512258	0.00027881	0.0166976	0.951779		1.00045	-0.000118422	0.000132049	-0.000119112	0.000131359
2016-07-24	205	1.01584	1.51967e+08	1.03193	1.01579	1.03183	1.01581	1.03188	1.01577	1.03179	1.00032	1.00057	2.00089	-0.000243717	0.0158016	-0.00539536	0.000278801	0.0166973	0.946356		1.00045	-0.000114801	0.000128915	-0.000115491	0.000128225
2016-07-25	206	1.01575	1.51953e+08	1.03174	1.0157	1.03164	1.01572	1.03169	1.01567	1.03159	1.00033	1.00056	2.00089	-0.000236599	0.0157061	-0.00566653	0.000278791	0.016697	0.940652		1.00045	-0.000110862	0.000125737	-0.000111552	0.000125047
2016-07-26	207	1.01565	1.51939e+08	1.03154	1.0156	1.03144	1.01562	1.03149	1.01557	1.03139	1.00033	1.00056	2.00089	-0.000229413	0.0156058	-0.00593598	0.000278778	0.0166967	0.934669		1.00045	-0.000107002	0.00012241	-0.000107693	0.00012172
2016-07-27	208	1.01555	1.51924e+08	1.03134	1.01549	1.03123	1.01552	1.03128	1.01547	1.03117	1.00033	1.00056	2.00089	-0.000221819	0.0155011	-0.00620368	0.00027877	0.0166964	0.92841		1.00045	-0.000103062	0.000118757	-0.000103752	0.000118067
2016-07-28	209	1.01544	1.51908e+08	1.03112	1.01539	1.03101	1.01541	1.03106	1.01536	1.03095	1.00034	1.00055	2.00089	-0.000214267	0.0153917	-0.00646957	0.000278759	0.0166961	0.921874		1.00045	-9.92935e-05	0.000114973	-9.99836e-05	0.000114283
2016-07-29	210	1.01533	1.51891e+08	1.0309	1.01527	1.03078	1.0153	1.03084	1.01525	1.03072	1.00034	1.00055	2.00089	-0.000206571	0.0152777	-0.0067335	0.000278747	0.0166957	0.915065		1.00045	-9.54415e-05	0.00011113	-9.61316e-05	0.00011044
2016-07-30	211	1.01522	1.51874e+08	1.03066	1.01516	1.03054	1.01519	1.0306	1.01513	1.03048	1.00035	1.00054	2.00089	-0.000198193	0.0151593	-0.00699543	0.000278739	0.0166955	0.907986		1.00045	-9.11461e-05	0.000107047	-9.18362e-05	0.000106357
2016-07-31	212	1.0151	1.51856e+08	1.03042	1.01504	1.0303	1.01507	1.03036	1.015	1.03023	1.00035	1.00054	2.00089	-0.000190111	0.0150362	-0.00725532	0.000278726	0.0166951	0.900634		1.00045	-8.72132e-05	0.000102898	-8.79034e-05	0.000102207
2016-08-01	213	1.01497	1.51838e+08	1.03017	1.01491	1.03004	1.01494	1.03011	1.01488	1.02998	1.00035	1.00054	2.00089	-0.000181554	0.0149088	-0.00751309	0.00027872	0.0166949	0.893017		1.00045	-8.28275e-05	9.8726e-05	-8.35176e-05	9.80359e-05
2016-08-02	214	1.01485	1.51819e+08	1.02991	1.01478	1.02978	1.01481	1.02985	1.01475	1.02971	1.00036	1.00053	2.00089	-0.000172694	0.014777	-0.00776863	0.000278712	0.0166947	0.885134		1.00045	-7.84407e-05	9.42528e-05	-7.91309e-05	9.35627e-05
2016-08-03	215	1.01471	1.51799e+08	1.02964	1.01465	1.02951	1.01468	1.02958	1.01461	1.02944	1.00036	1.00053	2.00089	-0.00016402	0.0146408	-0.00802172	0.000278701	0.0166943	0.876992		1.00045	-7.42495e-05	8.97708e-05	-7.49396e-05	8.90807e-05
2016-08-04	216	1.01458	1.51779e+08	1.02937	1.01451	1.02923	1.01454	1.0293	1.01447	1.02915	1.00037	1.00052	2.00089	-0.00015464	0.0145005	-0.00827231	0.000278695	0.0166941	0.868596		1.00045	-6.95892e-05	8.50508e-05	-7.02793e-05	8.43606e-05
2016-08-05	217	1.01444	1.51758e+08	1.02908	1.01436	1.02894	1.0144	1.02901	1.01433	1.02886	1.00037	1.00052	2.00089	-0.000145613	0.0143556	-0.00852074	0.000278687	0.0166939	0.859931		1.00045	-6.52187e-05	8.03944e-05	-6.59088e-05	7.97043e-05
2016-08-06	218	1.01429	1.51736e+08	1.02879	1.01422	1.02864	1.01426	1.02871	1.01418	1.02856	1.00038	1.00051	2.00089	-0.000136066	0.0142066	-0.00876658	0.000278682	0.0166938	0.851015		1.00045	-6.05748e-05	7.54912e-05	-6.12649e-05	7.4801e-05
2016-08-07	219	1.01414	1.51714e+08	1.02849	1.01407	1.02833	1.01411	1.02841	1.01403	1.02826	1.00038	1.00051	2.00089	-0.00012679	0.0140534	-0.00900973	0.000278674	0.0166935	0.841849		1.00045	-5.60045e-05	7.07854e-05	-5.66946e-05	7.00952e-05
2016-08-08	220	1.01399	1.51691e+08	1.02818	1.01391	1.02802	1.01395	1.0281	1.01387	1.02794	1.00039	1.0005	2.00089	-0.000117251	0.0138961	-0.00925031	0.000278671	0.0166934	0.832431		1.00045	-5.11011e-05	6.61502e-05	-5.17912e-05	6.54601e-05
2016-08-09	221	1.01383	1.51667e+08	1.02786	1.01375	1.0277	1.01379	1.02778	1.01371	1.02762	1.00039	1.0005	2.00089	-0.000107287	0.0137347	-0.00948802	0.000278666	0.0166933	0.82277		1.00045	-4.62607e-05	6.10267e-05	-4.69508e-05	6.03365e-05
2016-08-10	222	1.01367	1.51643e+08	1.02753	1.01359	1.02737	1.01363	1.02745	1.01355	1.02728	1.0004	1.00049	2.00089	-9.7795e-05	0.0135692	-0.00972306	0.000278661	0.0166931	0.81286		1.00045	-4.15808e-05	5.62142e-05	-4.22709e-05	5.55241e-05
2016-08-11	223	1.01351	1.51619e+08	1.0272	1.01342	1.02703	1.01347	1.02711	1.01338	1.02694	1.0004	1.00049	2.00089	-8.77792e-05	0.0133998	-0.00995526	0.000278662	0.0166932	0.802712		1.00045	-3.62985e-05	5.14808e-05	-3.69886e-05	5.07906e-05
2016-08-12	224	1.01334	1.51594e+08	1.02686	1.01325	1.02668	1.0133	1.02677	1.01321	1.0266	1.00041	1.00048	2.00089	-7.78604e-05	0.0132263	-0.0101844	0.000278657	0.016693	0.792326		1.00045	-3.12178e-05	4.66426e-05	-3.19079e-05	4.59524e-05
2016-08-13	225	1.01317	1.51568e+08	1.02651	1.01308	1.02633	1.01312	1.02642	1.01304	1.02624	1.00041	1.00048	2.00089	-6.73961e-05	0.013049	-0.0104104	0.000278653	0.0166929	0.781709		1.00045	-2.5776e-05	4.16201e-05	-2.64661e-05	4.09299e-05
2016-08-14	226	1.01299	1.51541e+08	1.02615	1.0129	1.02597	1.01295	1.02606	1.01286	1.02588	1.00042	1.00047	2.00089	-5.74618e-05	0.0128677	-0.0106335	0.000278649	0.0166928	0.770853		1.00045	-2.07742e-05	3.66876e-05	-2.14643e-05	3.59975e-05
2016-08-15	227	1.01281	1.51514e+08	1.02579	1.01272	1.0256	1.01277	1.02569	1.01267	1.02551	1.00042	1.00047	2.00089	-4.71368e-05	0.0126827	-0.0108535	0.000278648	0.0166928	0.759771		1.00045	-1.54004e-05	3.17364e-05	-1.60905e-05	3.10463e-05
2016-08-16	228	1.01263	1.51487e+08	1.02541	1.01253	1.02522	1.01258	1.02532	1.01249	1.02513	1.00043	1.00046	2.00089	-3.68399e-05	0.0124939	-0.0110703	0.000278648	0.0166928	0.748462		1.00045	-9.90239e-06	2.69375e-05	-1.05925e-05	2.62474e-05
2016-08-17	229	1.01244	1.51459e+08	1.02504	1.01234	1.02484	1.01239	1.02494	1.0123	1.02474	1.00043	1.00046	2.00089	-2.6507e-05	0.0123014	-0.0112837	0.000278647	0.0166927	0.736931		1.00045	-4.57467e-06	2.19324e-05	-5.2648e-06	2.12423e-05
2016-08-18	230	1.01225	1.5143e+08	1.02465	1.01215	1.02445	1.0122	1.02455	1.0121	1.02435	1.00044	1.00045	2.00089	-1.61301e-05	0.0121052	-0.0114939	0.000278646	0.0166927	0.725178		1.00045	8.88307e-07	1.70185e-05	1.98176e-07	1.63283e-05
2016-08-19	231	1.01205	1.51401e+08	1.02425	1.01196	1.02405	1.012	1.02415	1.01191	1.02395	1.00044	1.00045	2.00089	-5.52017e-06	0.0119054	-0.0117007	0.000278644	0.0166926	0.713211		1.00046	6.39204e-06	1.19122e-05	5.7019e-06	1.12221e-05
2016-08-20	232	1.01186	1.51372e+08	1.02385	1.01176	1.02365	1.01181	1.02375	1.0117	1.02355	1.00045	1.00044	2.00089	4.8061e-06	0.011702	-0.0119041	0.000278646	0.0166927	0.701028		1.00046	1.18938e-05	7.08769e-06	1.12037e-05	6.39755e-06
2016-08-21	233	1.01165	1.51341e+08	1.02344	1.01155	1.02324	1.0116	1.02334	1.0115	1.02313	1.00045	1.00044	2.00089	1.54884e-05	0.0114953	-0.012104	0.000278648	0.0166928	0.688637		1.00046	1.73484e-05	1.86001e-06	1.66583e-05	1.16988e-06
2016-08-22	234	1.01145	1.51311e+08	1.02303	1.01135	1.02282	1.0114	1.02292	1.01129	1.02271	1.00046	1.00043	2.00089	2.63181e-05	0.0112852	-0.0123002	0.00027865	0.0166928	0.67605		1.00046	2.27647e-05	-3.55342e-06	2.20745e-05	-4.24355e-06
2016-08-23	235	1.01124	1.51279e+08	1.02261	1.01113	1.02239	1.01119	1.0225	1.01108	1.02229	1.00046	1.00043	2.00089	3.65197e-05	0.0110715	-0.0124928	0.00027865	0.0166928	0.663252		1.00046	2.78906e-05	-8.62907e-06	2.72005e-05	-9.3192e-06
2016-08-24	236	1.01103	1.51248e+08	1.02218	1.01092	1.02196	1.01098	1.02207	1.01087	1.02185	1.00047	1.00042	2.00089	4.73102e-05	0.0108547	-0.0126819	0.000278655	0.016693	0.650258		1.00046	3.33891e-05	-1.39211e-05	3.26989e-05	-1.46113e-05
2016-08-25	237	1.01081	1.51216e+08	1.02175	1.0107	1.02152	1.01076	1.02163	1.01065	1.02141	1.00048	1.00042	2.00089	5.7955e-05	0.0106347	-0.012867	0.000278657	0.016693	0.637075		1.00046	3.8763e-05	-1.9192e-05	3.80728e-05	-1.98822e-05
2016-08-26	238	1.0106	1.51183e+08	1.0213	1.01048	1.02108	1.01054	1.02119	1.01043	1.02097	1.00048	1.00041	2.00089	6.82345e-05	0.0104115	-0.0130484	0.000278658	0.0166931	0.6237		1.00046	4.37671e-05	-2.44675e-05	4.30769e-05	-2.51576e-05
2016-08-27	239	1.01037	1.5115e+08	1.02086	1.01026	1.02063	1.01032	1.02074	1.01021	1.02052	1.00049	1.00041	2.00089	7.83908e-05	0.0101852	-0.0132258	0.00027866	0.0166931	0.610144		1.00046	4.86592e-05	-2.97315e-05	4.79691e-05	-3.04217e-05
2016-08-28	240	1.01015	1.51116e+08	1.0204	1.01004	1.02017	1.01009	1.02029	1.00998	1.02006	1.00049	1.0004	2.00089	8.86302e-05	0.00995597	-0.0133994	0.000278665	0.0166933	0.596407		1.00046	5.36951e-05	-3.4935e-05	5.3005e-05	-3.56252e-05
2016-08-29	241	1.00992	1.51082e+08	1.01994	1.00981	1.01971	1.00986	1.01983	1.00975	1.01959	1.0005	1.0004	2.00089	9.84347e-05	0.00972362	-0.0135691	0.000278668	0.0166934	0.582485		1.00045	5.82253e-05	-4.02094e-05	5.75352e-05	-4.08995e-05
2016-08-30	242	1.00969	1.51048e+08	1.01948	1.00958	1.01924	1.00963	1.01936	1.00952	1.01912	1.0005	1.00039	2.00089	0.000108575	0.0094886	-0.0137347	0.000278675	0.0166935	0.568399		1.00045	6.31628e-05	-4.54127e-05	6.24726e-05	-4.61028e-05
2016-08-31	243	1.00946	1.51013e+08	1.01901	1.00934	1.01877	1.0094	1.01889	1.00928	1.01865	1.0005	1.00039	2.00089	0.000118834	0.00925071	-0.0138961	0.000278678	0.0166937	0.554146		1.00045	6.7858e-05	-5.09764e-05	6.71678e-05	-5.16665e-05
2016-09-01	244	1.00922	1.50978e+08	1.01853	1.0091	1.01829	1.00916	1.01841	1.00904	1.01817	1.00051	1.00038	2.00089	0.000128495	0.00901018	-0.0140536	0.000278686	0.0166939	0.539729		1.00045	7.25186e-05	-5.59763e-05	7.18285e-05	-5.66664e-05
2016-09-02	245	1.00898	1.50942e+08	1.01805	1.00886	1.0178	1.00892	1.01793	1.0088	1.01768	1.00051	1.00038	2.00089	0.000137591	0.00876676	-0.0142068	0.000278688	0.0166939	0.525146		1.00045	7.67945e-05	-6.07966e-05	7.61044e-05	-6.14868e-05
2016-09-03	246	1.00874	1.50906e+08	1.01756	1.00862	1.01731	1.00868	1.01744	1.00856	1.01719	1.00052	1.00037	2.00089	0.000147316	0.008521	-0.0143557	0.000278693	0.0166941	0.51042		1.00045	8.12489e-05	-6.60673e-05	8.05588e-05	-6.67575e-05
2016-09-04	247	1.0085	1.50869e+08	1.01707	1.00837	1.01682	1.00844	1.01694	1.00831	1.01669	1.00052	1.00037	2.00089	0.000156349	0.00827268	-0.0145004	0.000278698	0.0166942	0.495541		1.00045	8.54819e-05	-7.08668e-05	8.47917e-05	-7.1557e-05
2016-09-05	248	1.00825	1.50832e+08	1.01657	1.00813	1.01632	1.00819	1.01644	1.00806	1.01619	1.00053	1.00036	2.00089	0.000165271	0.00802183	-0.0146408	0.000278703	0.0166944	0.48051		1.00045	8.96476e-05	-7.56235e-05	8.89575e-05	-7.63136e-05
2016-09-06	249	1.008	1.50795e+08	1.01607	1.00788	1.01581	1.00794	1.01594	1.00781	1.01569	1.00053	1.00036	2.00089	0.000173894	0.0077686	-0.014777	0.000278711	0.0166946	0.465335		1.00045	9.36523e-05	-8.02416e-05	9.29621e-05	-8.09317e-05
2016-09-07	250	1.00775	1.50757e+08	1.01556	1.00762	1.01531	1.00769	1.01543	1.00756	1.01518	1.00053	1.00035	2.00089	0.00018256	0.00751325	-0.0149087	0.000278718	0.0166948	0.450034		1.00045	9.78033e-05	-8.47567e-05	9.71131e-05	-8.54468e-05
2016-09-08	251	1.0075	1.50719e+08	1.01505	1.00737	1.01479	1.00743	1.01492	1.0073	1.01466	1.00054	1.00035	2.00089	0.000191176	0.00725574	-0.0150359	0.000278723	0.016695	0.434606		1.00045	0.000101953	-8.92224e-05	0.000101263	-8.99125e-05
2016-09-09	252	1.00724	1.50681e+08	1.01453	1.00711	1.01427	1.00718	1.0144	1.00705	1.01414	1.00054	1.00034	2.00089	0.00019904	0.00699583	-0.0151587	0.000278728	0.0166951	0.419034		1.00045	0.000105603	-9.34375e-05	0.000104912	-9.41277e-05
2016-09-10	253	1.00698	1.50642e+08	1.01401	1.00685	1.01375	1.00692	1.01388	1.00679	1.01362	1.00055	1.00034	2.00089	0.000207046	0.00673406	-0.015277	0.000278736	0.0166954	0.403349		1.00045	0.000109462	-9.75846e-05	0.000108772	-9.82747e-05
2016-09-11	254	1.00672	1.50604e+08	1.01349	1.00659	1.01323	1.00666	1.01336	1.00653	1.01309	1.00055	1.00034	2.00089	0.000214797	0.00647027	-0.015391	0.000278746	0.0166957	0.387541		1.00045	0.000113282	-0.000101515	0.000112592	-0.000102205
2016-09-12	255	1.00646	1.50564e+08	1.01296	1.00633	1.0127	1.00639	1.01283	1.00626	1.01256	1.00055	1.00033	2.00089	0.000222103	0.00620442	-0.0155003	0.000278753	0.0166959	0.371614		1.00045	0.000116916	-0.000105188	0.000116225	-0.000105878
2016-09-13	256	1.0062	1.50525e+08	1.01243	1.00606	1.01216	1.00613	1.0123	1.006	1.01203	1.00056	1.00033	2.00089	0.0002296	0.0059369	-0.015605	0.000278762	0.0166962	0.355584		1.00045	0.000120621	-0.000108979	0.000119931	-0.000109669
2016-09-14	257	1.00593	1.50485e+08	1.0119	1.0058	1.01163	1.00586	1.01176	1.00573	1.01149	1.00056	1.00032	2.00089	0.000236539	0.00566752	-0.0157052	0.000278773	0.0166965	0.339444		1.00045	0.000124148	-0.000112391	0.000123458	-0.000113082
2016-09-15	258	1.00566	1.50445e+08	1.01136	1.00553	1.01109	1.0056	1.01122	1.00546	1.01095	1.00056	1.00032	2.00089	0.000243335	0.00539642	-0.0158006	0.00027878	0.0166967	0.323203		1.00045	0.000127452	-0.000115884	0.000126761	-0.000116574
2016-09-16	259	1.00539	1.50405e+08	1.01082	1.00526	1.01054	1.00533	1.01068	1.00519	1.01041	1.00057	1.00032	2.00089	0.000249889	0.00512379	-0.0158915	0.000278792	0.0166971	0.306868		1.00045	0.000130736	-0.000119152	0.000130046	-0.000119843
2016-09-17	260	1.00512	1.50364e+08	1.01027	1.00499	1.01	1.00505	1.01013	1.00492	1.00986	1.00057	1.00031	2.00089	0.000256187	0.0048496	-0.0159776	0.000278802	0.0166974	0.290441		1.00045	0.000133855	-0.000122332	0.000133165	-0.000123022
2016-09-18	261	1.00485	1.50323e+08	1.00972	1.00471	1.00945	1.00478	1.00958	1.00464	1.00931	1.00057	1.00031	2.00089	0.000262111	0.00457404	-0.0160589	0.000278811	0.0166976	0.273933		1.00045	0.000136861	-0.00012525	0.000136171	-0.00012594
2016-09-19	262	1.00457	1.50282e+08	1.00917	1.00444	1.00889	1.00451	1.00903	1.00437	1.00876	1.00058	1.00031	2.00089	0.000267707	0.00429705	-0.0161357	0.000278826	0.0166981	0.257338		1.00045	0.000139656	-0.000128051	0.000138966	-0.000128741
2016-09-20	263	1.0043	1.50241e+08	1.00862	1.00416	1.00834	1.00423	1.00848	1.00409	1.0082	1.00058	1.00031	2.00089	0.000273319	0.00401876	-0.0162076	0.000278838	0.0166984	0.240667		1.00045	0.000142395	-0.000130924	0.000141705	-0.000131614
2016-09-21	264	1.00402	1.502e+08	1.00806	1.00388	1.00778	1.00395	1.00792	1.00381	1.00764	1.00058	1.0003	2.00089	0.000278522	0.00373919	-0.0162747	0.000278848	0.0166987	0.22392		1.00045	0.000144828	-0.000133694	0.000144138	-0.000134384
2016-09-22	265	1.00374	1.50158e+08	1.0075	1.0036	1.00722	1.00367	1.00736	1.00353	1.00708	1.00058	1.0003	2.00089	0.00028362	0.00345874	-0.0163371	0.000278864	0.0166992	0.20712		1.00045	0.000147362	-0.000136258	0.000146672	-0.000136948
2016-09-23	266	1.00346	1.50116e+08	1.00694	1.00332	1.00666	1.00339	1.0068	1.00325	1.00652	1.00059	1.0003	2.00088	0.000287997	0.00317701	-0.0163945	0.000278874	0.0166995	0.190246		1.00045	0.000149195	-0.000138803	0.000148505	-0.000139493
2016-09-24	267	1.00318	1.50074e+08	1.00638	1.00304	1.00609	1.00311	1.00624	1.00297	1.00595	1.00059	1.0003	2.00088	0.000292455	0.00289449	-0.0164472	0.000278887	0.0166999	0.173324		1.00045	0.000151181	-0.000141273	0.000150491	-0.000141964
2016-09-25	268	1.0029	1.50032e+08	1.00581	1.00276	1.00553	1.00283	1.00567	1.00269	1.00539	1.00059	1.00029	2.00088	0.000296272	0.00261106	-0.0164949	0.0002789	0.0167003	0.156348		1.00045	0.000152723	-0.000143549	0.000152033	-0.000144239
2016-09-26	269	1.00262	1.4999e+08	1.00524	1.00248	1.00496	1.00255	1.0051	1.00241	1.00482	1.00059	1.00029	2.00088	0.000299753	0.00232681	-0.0165378	0.000278912	0.0167007	0.139324		1.00045	0.000154071	-0.000145683	0.000153381	-0.000146373
2016-09-27	270	1.00234	1.49947e+08	1.00468	1.00219	1.00439	1.00226	1.00453	1.00212	1.00425	1.00059	1.00029	2.00088	0.000303051	0.00204198	-0.0165758	0.000278926	0.0167011	0.122266		1.00044	0.000155328	-0.000147724	0.000154638	-0.000148414
2016-09-28	271	1.00205	1.49905e+08	1.00411	1.00191	1.00382	1.00198	1.00396	1.00184	1.00368	1.00059	1.00029	2.00088	0.000306096	0.00175649	-0.0166088	0.000278938	0.0167014	0.10517		1.00044	0.000156245	-0.000149851	0.000155555	-0.000150542
2016-09-29	272	1.00177	1.49862e+08	1.00354	1.00162	1.00325	1.00169	1.00339	1.00155	1.00311	1.00059	1.00029	2.00088	0.000308789	0.00147054	-0.0166369	0.000278949	0.0167018	0.0880466		1.00044	0.000157273	-0.000151516	0.000156583	-0.000152207
2016-09-30	273	1.00148	1.49819e+08	1.00296	1.00134	1.00268	1.00141	1.00282	1.00127	1.00253	1.00059	1.00028	2.00088	0.000310859	0.00118395	-0.01666	0.000278959	0.0167021	0.0708865		1.00044	0.000157713	-0.000153146	0.000157023	-0.000153836
2016-10-01	274	1.00119	1.49777e+08	1.00239	1.00105	1.0021	1.00112	1.00225	1.00098	1.00196	1.0006	1.00028	2.00088	0.000313368	0.000897242	-0.0166786	0.000278981	0.0167027	0.0537183		1.00044	0.000158167	-0.000155201	0.000157477	-0.000155891
2016-10-02	275	1.00091	1.49734e+08	1.00182	1.00076	1.00153	1.00084	1.00167	1.00069	1.00139	1.0006	1.00028	2.00087	0.000316644	0.000610407	-0.0166926	0.000279014	0.0167037	0.0365431		1.00044	0.000158635	-0.000158009	0.000157945	-0.000158699
2016-10-03	276	1.00062	1.49691e+08	1.00124	1.00048	1.00095	1.00055	1.0011	1.00041	1.00081	1.0006	1.00028	2.00087	0.000316296	0.000323171	-0.0167002	0.000279002	0.0167034	0.0193477		1.00044	0.000158667	-0.000157628	0.000157977	-0.000158318
2016-10-04	277	1.00033	1.49648e+08	1.00067	1.00019	1.00038	1.00026	1.00052	1.00012	1.00024	1.0006	1.00028	2.00087	0.000315675	3.58107e-05	-0.016703	0.000278991	0.016703	0.00214396		1.00044	0.000158314	-0.000157361	0.000157624	-0.000158051
2016-10-05	278	1.00005	1.49605e+08	1.00009	0.999903	0.999805	0.999975	0.999949	0.999831	0.999662	1.0006	1.00028	2.00088	0.000315161	-0.00025125	-0.0167008	0.000278979	0.0167027	-0.0150425		1.00044	0.000158326	-0.000156835	0.000157636	-0.000157525
2016-10-06	279	0.999759	1.49562e+08	0.999518	0.999615	0.999231	0.999687	0.999374	0.999544	0.999087	1.00059	1.00028	2.00088	0.000314148	-0.000538435	-0.0166937	0.00027897	0.0167024	-0.032237		1.00044	0.000157952	-0.000156196	0.000157262	-0.000156886
2016-10-07	280	0.999472	1.49519e+08	0.998944	0.999328	0.998656	0.9994	0.9988	0.999256	0.998513	1.00059	1.00028	2.00088	0.000312942	-0.00082542	-0.0166817	0.000278959	0.0167021	-0.0494202		1.00044	0.000157543	-0.000155399	0.000156853	-0.000156089
2016-10-08	281	0.999184	1.49476e+08	0.998369	0.999041	0.998082	0.999112	0.998226	0.998969	0.997939	1.00059	1.00028	2.00088	0.000310863	-0.00111223	-0.0166647	0.000278949	0.0167018	-0.0665935		1.00044	0.000156548	-0.000154315	0.000155858	-0.000155005
2016-10-09	282	0.998897	1.49433e+08	0.997795	0.998754	0.997509	0.998825	0.997652	0.998682	0.997366	1.00059	1.00028	2.00088	0.000308635	-0.00139861	-0.0166428	0.00027894	0.0167015	-0.0837417		1.00044	0.000155666	-0.000152968	0.000154976	-0.000153659
2016-10-10	283	0.99861	1.4939e+08	0.997223	0.998467	0.996937	0.998539	0.99708	0.998396	0.996794	1.00059	1.00029	2.00088	0.000306808	-0.00168452	-0.016616	0.000278929	0.0167012	-0.100862		1.00044	0.000154997	-0.000151811	0.000154307	-0.000152502
2016-10-11	284	0.998324	1.49347e+08	0.996651	0.998181	0.996365	0.998252	0.996508	0.998109	0.996222	1.00059	1.00029	2.00088	0.000303882	-0.00197005	-0.0165842	0.000278917	0.0167008	-0.117962		1.00044	0.000153739	-0.000150143	0.000153049	-0.000150834
2016-10-12	285	0.998038	1.49304e+08	0.99608	0.997895	0.995795	0.997967	0.995937	0.997824	0.995652	1.00059	1.00029	2.00088	0.000300923	-0.00225493	-0.0165476	0.000278908	0.0167005	-0.135022		1.00044	0.000152541	-0.000148381	0.000151851	-0.000149072
2016-10-13	286	0.997752	1.49262e+08	0.99551	0.99761	0.995226	0.997681	0.995368	0.997539	0.995084	1.00059	1.00029	2.00088	0.000297556	-0.00253921	-0.0165061	0.0002789	0.0167003	-0.152046		1.00044	0.000151303	-0.000146253	0.000150613	-0.000146943
2016-10-14	287	0.997467	1.49219e+08	0.994941	0.997325	0.994658	0.997396	0.9948	0.997254	0.994516	1.00059	1.00029	2.00088	0.00029388	-0.00282269	-0.0164597	0.00027889	0.0167	-0.169023		1.00044	0.000149821	-0.000144059	0.000149131	-0.000144749
2016-10-15	288	0.997183	1.49176e+08	0.994375	0.997042	0.994092	0.997112	0.994233	0.996971	0.993951	1.00059	1.0003	2.00088	0.00028979	-0.00310532	-0.0164084	0.00027888	0.0166997	-0.185951		1.00044	0.000148194	-0.000141596	0.000147504	-0.000142286
2016-10-16	289	0.9969	1.49134e+08	0.993809	0.996758	0.993527	0.996829	0.993668	0.996688	0.993387	1.00058	1.0003	2.00088	0.000285405	-0.00338709	-0.0163524	0.000278873	0.0166995	-0.202826		1.00044	0.000146422	-0.000138983	0.000145732	-0.000139673
2016-10-17	290	0.996617	1.49092e+08	0.993246	0.996476	0.992965	0.996547	0.993105	0.996406	0.992824	1.00058	1.0003	2.00088	0.000280601	-0.00366792	-0.0162914	0.000278863	0.0166992	-0.219646		1.00045	0.000144501	-0.0001361	0.000143811	-0.00013679
2016-10-18	291	0.996335	1.4905e+08	0.992684	0.996195	0.992404	0.996265	0.992544	0.996125	0.992264	1.00058	1.0003	2.00088	0.000275496	-0.00394771	-0.0162256	0.000278854	0.0166989	-0.236405		1.00045	0.000142479	-0.000133017	0.000141789	-0.000133707
2016-10-19	292	0.996054	1.49008e+08	0.992124	0.995915	0.991846	0.995985	0.991985	0.995845	0.991707	1.00058	1.00031	2.00088	0.000270083	-0.00422638	-0.016155	0.000278847	0.0166987	-0.253096		1.00045	0.000140155	-0.000129928	0.000139465	-0.000130618
2016-10-20	293	0.995775	1.48966e+08	0.991568	0.995636	0.99129	0.995705	0.991429	0.995566	0.991152	1.00057	1.00031	2.00089	0.000264485	-0.00450357	-0.0160795	0.000278833	0.0166983	-0.269703		1.00045	0.000137822	-0.000126663	0.000137132	-0.000127353
2016-10-21	294	0.995496	1.48924e+08	0.991013	0.995358	0.990737	0.995427	0.990875	0.995288	0.990599	1.00057	1.00031	2.00089	0.000258471	-0.00477961	-0.0159992	0.000278821	0.0166979	-0.28624		1.00045	0.000135132	-0.000123339	0.000134442	-0.000124029
2016-10-22	295	0.995219	1.48883e+08	0.990461	0.995081	0.990186	0.99515	0.990324	0.995012	0.990049	1.00057	1.00032	2.00089	0.000252482	-0.00505417	-0.0159142	0.000278808	0.0166975	-0.30269		1.00045	0.000132629	-0.000119853	0.000131939	-0.000120543
2016-10-23	296	0.994943	1.48841e+08	0.989912	0.994806	0.989639	0.994874	0.989775	0.994737	0.989502	1.00057	1.00032	2.00089	0.000245835	-0.00532736	-0.0158246	0.0002788	0.0166973	-0.319055		1.00045	0.000129512	-0.000116323	0.000128822	-0.000117013
2016-10-24	297	0.994668	1.488e+08	0.989365	0.994532	0.989094	0.9946	0.98923	0.994464	0.988958	1.00056	1.00032	2.00089	0.000238778	-0.00559894	-0.0157303	0.00027879	0.016697	-0.335326		1.00045	0.000126326	-0.000112452	0.000125636	-0.000113142
2016-10-25	298	0.994395	1.48759e+08	0.988822	0.99426	0.988552	0.994328	0.988687	0.994192	0.988417	1.00056	1.00033	2.00089	0.000231603	-0.00586882	-0.0156312	0.000278777	0.0166966	-0.351497		1.00045	0.000123068	-0.000108535	0.000122378	-0.000109225
2016-10-26	299	0.994124	1.48719e+08	0.988283	0.993989	0.988014	0.994057	0.988148	0.993922	0.98788	1.00056	1.00033	2.00089	0.0002241	-0.00613697	-0.0155276	0.000278768	0.0166963	-0.367564		1.00045	0.000119484	-0.000104615	0.000118794	-0.000105305
2016-10-27	300	0.993854	1.48678e+08	0.987746	0.99372	0.98748	0.993787	0.987613	0.993653	0.987346	1.00055	1.00034	2.00089	0.000216488	-0.00640334	-0.0154193	0.000278758	0.0166961	-0.383524		1.00045	0.000115671	-0.000100816	0.000114981	-0.000101506
2016-10-28	301	0.993586	1.48638e+08	0.987213	0.993453	0.986949	0.99352	0.987081	0.993386	0.986817	1.00055	1.00034	2.00089	0.00020886	-0.00666776	-0.0153064	0.000278746	0.0166957	-0.39937		1.00045	0.000111874	-9.69855e-05	0.000111184	-9.76756e-05
2016-10-29	302	0.99332	1.48599e+08	0.986684	0.993188	0.986422	0.993254	0.986553	0.993122	0.986291	1.00054	1.00034	2.00089	0.000200629	-0.0069302	-0.0151891	0.000278737	0.0166954	-0.415095		1.00045	0.00010784	-9.27889e-05	0.00010715	-9.3479e-05
2016-10-30	303	0.993056	1.48559e+08	0.986159	0.992924	0.985899	0.99299	0.986029	0.992859	0.985769	1.00054	1.00035	2.00089	0.000192417	-0.00719061	-0.0150672	0.000278726	0.0166951	-0.430702		1.00045	0.000103664	-8.87534e-05	0.000102973	-8.94435e-05
2016-10-31	304	0.992793	1.4852e+08	0.985639	0.992663	0.98538	0.992728	0.98551	0.992598	0.985251	1.00054	1.00035	2.00089	0.000184035	-0.00744889	-0.014941	0.000278718	0.0166949	-0.446179		1.00045	9.95413e-05	-8.44934e-05	9.88512e-05	-8.51835e-05
2016-11-01	305	0.992533	1.48481e+08	0.985122	0.992404	0.984866	0.992469	0.984994	0.99234	0.984738	1.00053	1.00036	2.00089	0.000175152	-0.00770505	-0.0148103	0.000278711	0.0166947	-0.461528		1.00045	9.50697e-05	-8.00826e-05	9.43796e-05	-8.07727e-05
2016-11-02	306	0.992275	1.48442e+08	0.98461	0.992147	0.984357	0.992211	0.984483	0.992084	0.98423	1.00053	1.00036	2.00089	0.000166433	-0.00795875	-0.0146751	0.000278701	0.0166943	-0.476733		1.00045	9.05903e-05	-7.58428e-05	8.99002e-05	-7.65329e-05
2016-11-03	307	0.99202	1.48404e+08	0.984103	0.991893	0.983852	0.991956	0.983977	0.99183	0.983726	1.00052	1.00037	2.00089	0.000157286	-0.00820994	-0.0145358	0.000278693	0.0166941	-0.491787		1.00045	8.59986e-05	-7.12877e-05	8.53084e-05	-7.19778e-05
2016-11-04	308	0.991766	1.48366e+08	0.9836	0.991641	0.983351	0.991704	0.983476	0.991578	0.983227	1.00052	1.00037	2.00089	0.000148115	-0.00845891	-0.0143921	0.000278686	0.0166939	-0.506707		1.00045	8.12453e-05	-6.68697e-05	8.05552e-05	-6.75599e-05
2016-11-05	309	0.991515	1.48329e+08	0.983102	0.991391	0.982856	0.991453	0.982979	0.991329	0.982733	1.00051	1.00037	2.00089	0.000138632	-0.00870548	-0.0142441	0.000278681	0.0166937	-0.521481		1.00045	7.63743e-05	-6.22575e-05	7.56841e-05	-6.29476e-05
2016-11-06	310	0.991267	1.48291e+08	0.98261	0.991144	0.982367	0.991205	0.982488	0.991083	0.982245	1.00051	1.00038	2.00089	0.000129294	-0.00894927	-0.014092	0.000278674	0.0166935	-0.536092		1.00045	7.16252e-05	-5.76691e-05	7.0935e-05	-5.83592e-05
2016-11-07	311	0.991021	1.48255e+08	0.982123	0.9909	0.981882	0.99096	0.982003	0.990839	0.981762	1.0005	1.00038	2.00089	0.000119872	-0.00919048	-0.0139357	0.00027867	0.0166934	-0.550546		1.00045	6.69976e-05	-5.28739e-05	6.63075e-05	-5.35641e-05
2016-11-08	312	0.990778	1.48218e+08	0.981641	0.990658	0.981403	0.990718	0.981522	0.990598	0.981284	1.0005	1.00039	2.00089	0.000109929	-0.00942896	-0.0137753	0.000278665	0.0166933	-0.564836		1.00045	6.1985e-05	-4.79442e-05	6.12949e-05	-4.86343e-05
2016-11-09	313	0.990538	1.48182e+08	0.981165	0.990419	0.980929	0.990478	0.981047	0.990359	0.980812	1.00049	1.00039	2.00089	0.000100331	-0.00966464	-0.0136108	0.00027866	0.0166931	-0.578959		1.00045	5.70321e-05	-4.32985e-05	5.63419e-05	-4.39886e-05
2016-11-10	314	0.9903	1.48147e+08	0.980694	0.990183	0.980462	0.990241	0.980578	0.990124	0.980346	1.00049	1.0004	2.00089	9.03918e-05	-0.00989759	-0.0134424	0.00027866	0.0166931	-0.592914		1.00045	5.22864e-05	-3.81054e-05	5.15962e-05	-3.87956e-05
2016-11-11	315	0.990065	1.48112e+08	0.980229	0.98995	0.98	0.990007	0.980115	0.989892	0.979886	1.00048	1.0004	2.00089	8.04991e-05	-0.0101275	-0.0132699	0.000278657	0.016693	-0.606689		1.00045	4.74874e-05	-3.30117e-05	4.67973e-05	-3.37019e-05
2016-11-12	316	0.989834	1.48077e+08	0.979771	0.989719	0.979545	0.989777	0.979658	0.989662	0.979431	1.00048	1.00041	2.00089	7.01412e-05	-0.0103543	-0.0130936	0.000278652	0.0166929	-0.620281		1.00045	4.253e-05	-2.76112e-05	4.18399e-05	-2.83013e-05
2016-11-13	317	0.989605	1.48043e+08	0.979318	0.989492	0.979095	0.989549	0.979207	0.989436	0.978983	1.00047	1.00041	2.00089	6.00128e-05	-0.0105781	-0.0129132	0.000278649	0.0166928	-0.633695		1.00045	3.75131e-05	-2.24998e-05	3.68229e-05	-2.31899e-05
2016-11-14	318	0.989379	1.48009e+08	0.978872	0.989268	0.978652	0.989324	0.978762	0.989213	0.978542	1.00047	1.00042	2.00089	4.9824e-05	-0.0107989	-0.0127292	0.000278648	0.0166927	-0.646921		1.00045	3.258e-05	-1.7244e-05	3.18899e-05	-1.79341e-05
2016-11-15	319	0.989157	1.47976e+08	0.978432	0.989048	0.978215	0.989102	0.978323	0.988993	0.978107	1.00046	1.00043	2.00089	3.94649e-05	-0.0110165	-0.0125413	0.000278647	0.0166927	-0.659956		1.00045	2.77245e-05	-1.17403e-05	2.70344e-05	-1.24305e-05
2016-11-16	320	0.988938	1.47943e+08	0.977998	0.98883	0.977785	0.988884	0.977891	0.988776	0.977678	1.00046	1.00043	2.00089	2.91488e-05	-0.0112308	-0.0123497	0.000278647	0.0166927	-0.672796		1.00045	2.27908e-05	-6.35806e-06	2.21006e-05	-7.04819e-06
2016-11-17	321	0.988722	1.47911e+08	0.977571	0.988616	0.977361	0.988669	0.977466	0.988563	0.977256	1.00045	1.00044	2.00089	1.87892e-05	-0.0114418	-0.0121545	0.000278646	0.0166927	-0.685438		1.00045	1.78229e-05	-9.66306e-07	1.71327e-05	-1.65644e-06
2016-11-18	322	0.988509	1.47879e+08	0.977151	0.988405	0.976944	0.988457	0.977047	0.988353	0.976841	1.00045	1.00044	2.00089	8.17739e-06	-0.0116495	-0.0119555	0.000278645	0.0166927	-0.697879		1.00045	1.2766e-05	4.58863e-06	1.20759e-05	3.89849e-06
2016-11-19	323	0.9883	1.47848e+08	0.976737	0.988197	0.976534	0.988249	0.976636	0.988146	0.976432	1.00044	1.00045	2.00089	-2.20152e-06	-0.0118537	-0.0117531	0.000278645	0.0166927	-0.710113		1.00045	7.86429e-06	1.00658e-05	7.17416e-06	9.37567e-06
2016-11-20	324	0.988094	1.47817e+08	0.976331	0.987993	0.976131	0.988044	0.976231	0.987943	0.976031	1.00044	1.00045	2.00089	-1.28049e-05	-0.0120545	-0.0115472	0.000278648	0.0166927	-0.72214		1.00046	2.76404e-06	1.55689e-05	2.07391e-06	1.48788e-05
2016-11-21	325	0.987892	1.47787e+08	0.975931	0.987793	0.975735	0.987843	0.975833	0.987743	0.975637	1.00043	1.00046	2.00089	-2.37024e-05	-0.0122516	-0.0113379	0.000278651	0.0166928	-0.733946		1.00046	-2.69557e-06	2.10068e-05	-3.3857e-06	2.03167e-05
2016-11-22	326	0.987694	1.47757e+08	0.975539	0.987596	0.975346	0.987645	0.975443	0.987547	0.97525	1.00043	1.00046	2.00089	-3.39249e-05	-0.0124451	-0.0111252	0.00027865	0.0166928	-0.745536		1.00046	-7.76941e-06	2.61555e-05	-8.45954e-06	2.54654e-05
2016-11-23	327	0.987499	1.47728e+08	0.975154	0.987403	0.974965	0.987451	0.975059	0.987355	0.974871	1.00042	1.00047	2.00089	-4.47272e-05	-0.0126351	-0.0109091	0.000278655	0.016693	-0.756912		1.00046	-1.31049e-05	3.16223e-05	-1.37951e-05	3.09322e-05
2016-11-24	328	0.987308	1.47699e+08	0.974776	0.987214	0.974591	0.987261	0.974684	0.987167	0.974499	1.00042	1.00047	2.00089	-5.53334e-05	-0.0128212	-0.0106899	0.000278657	0.016693	-0.768056		1.00046	-1.83188e-05	3.70146e-05	-1.90089e-05	3.63245e-05
2016-11-25	329	0.98712	1.47671e+08	0.974406	0.987028	0.974225	0.987074	0.974316	0.986983	0.974135	1.00041	1.00048	2.00089	-6.58211e-05	-0.0130035	-0.0104674	0.000278659	0.0166931	-0.778976		1.00046	-2.36608e-05	4.21603e-05	-2.4351e-05	4.14702e-05
2016-11-26	330	0.986937	1.47644e+08	0.974044	0.986847	0.973867	0.986892	0.973956	0.986802	0.973779	1.00041	1.00048	2.00089	-7.59328e-05	-0.0131819	-0.010242	0.000278661	0.0166931	-0.789661		1.00046	-2.88898e-05	4.7043e-05	-2.95799e-05	4.63528e-05
2016-11-27	331	0.986757	1.47617e+08	0.97369	0.986669	0.973517	0.986713	0.973603	0.986626	0.97343	1.0004	1.00049	2.00089	-8.61759e-05	-0.0133564	-0.0100135	0.000278664	0.0166932	-0.800112		1.00045	-3.41085e-05	5.20674e-05	-3.47987e-05	5.13772e-05
2016-11-28	332	0.986582	1.47591e+08	0.973343	0.986496	0.973174	0.986539	0.973259	0.986453	0.973089	1.0004	1.00049	2.00089	-9.61557e-05	-0.0135272	-0.00978188	0.000278669	0.0166934	-0.81033		1.00045	-3.94197e-05	5.6736e-05	-4.01099e-05	5.60458e-05
2016-11-29	333	0.98641	1.47565e+08	0.973005	0.986326	0.97284	0.986368	0.972922	0.986284	0.972757	1.00039	1.0005	2.00089	-0.000106144	-0.0136938	-0.00954753	0.000278674	0.0166935	-0.820303		1.00045	-4.45849e-05	6.15589e-05	-4.5275e-05	6.08688e-05
2016-11-30	334	0.986243	1.4754e+08	0.972674	0.986161	0.972513	0.986202	0.972594	0.98612	0.972433	1.00039	1.0005	2.00089	-0.000116471	-0.0138563	-0.00931034	0.000278679	0.0166937	-0.830032		1.00045	-5.01067e-05	6.63639e-05	-5.07968e-05	6.56738e-05
2016-12-01	335	0.986079	1.47515e+08	0.972352	0.986	0.972196	0.98604	0.972274	0.98596	0.972117	1.00038	1.00051	2.00089	-0.000126349	-0.0140147	-0.00907048	0.000278686	0.0166939	-0.839512		1.00045	-5.53412e-05	7.10081e-05	-5.60313e-05	7.0318e-05
2016-12-02	336	0.98592	1.47492e+08	0.972039	0.985843	0.971886	0.985882	0.971963	0.985804	0.97181	1.00038	1.00051	2.00089	-0.000135437	-0.0141689	-0.00882778	0.000278689	0.016694	-0.848746		1.00045	-6.00443e-05	7.53922e-05	-6.07345e-05	7.47021e-05
2016-12-03	337	0.985765	1.47468e+08	0.971734	0.98569	0.971585	0.985728	0.97166	0.985653	0.971511	1.00037	1.00052	2.00089	-0.00014517	-0.014319	-0.00858258	0.000278695	0.0166942	-0.857726		1.00045	-6.53188e-05	7.98513e-05	-6.60089e-05	7.91611e-05
2016-12-04	338	0.985615	1.47446e+08	0.971437	0.985542	0.971293	0.985579	0.971365	0.985506	0.971221	1.00037	1.00052	2.00089	-0.000154314	-0.0144647	-0.00833492	0.000278699	0.0166943	-0.866448		1.00045	-7.02246e-05	8.40897e-05	-7.09147e-05	8.33996e-05
2016-12-05	339	0.985469	1.47424e+08	0.97115	0.985398	0.97101	0.985434	0.97108	0.985363	0.97094	1.00036	1.00053	2.00089	-0.000163269	-0.0146062	-0.00808468	0.000278704	0.0166944	-0.874916		1.00045	-7.49599e-05	8.83091e-05	-7.565e-05	8.7619e-05
2016-12-06	340	0.985328	1.47403e+08	0.97087	0.985259	0.970735	0.985293	0.970803	0.985225	0.970668	1.00036	1.00053	2.00089	-0.000172047	-0.0147435	-0.00783204	0.000278712	0.0166947	-0.883127		1.00045	-7.96803e-05	9.23662e-05	-8.03705e-05	9.1676e-05
2016-12-07	341	0.98519	1.47382e+08	0.9706	0.985124	0.97047	0.985157	0.970535	0.985091	0.970404	1.00035	1.00053	2.00089	-0.000180688	-0.0148763	-0.00757722	0.000278719	0.0166949	-0.891071		1.00045	-8.41954e-05	9.64927e-05	-8.48856e-05	9.58026e-05
2016-12-08	342	0.985058	1.47363e+08	0.970339	0.984994	0.970213	0.985026	0.970276	0.984962	0.97015	1.00035	1.00054	2.00089	-0.000189304	-0.0150046	-0.00732025	0.000278725	0.0166951	-0.898747		1.00045	-8.8661e-05	0.000100643	-8.93511e-05	9.99527e-05
2016-12-09	343	0.98493	1.47343e+08	0.970087	0.984868	0.969965	0.984899	0.970026	0.984837	0.969905	1.00034	1.00054	2.00089	-0.000197393	-0.0151285	-0.00706093	0.00027873	0.0166952	-0.906161		1.00045	-9.29759e-05	0.000104417	-9.36661e-05	0.000103727
2016-12-10	344	0.984807	1.47325e+08	0.969844	0.984747	0.969727	0.984777	0.969785	0.984717	0.969668	1.00034	1.00055	2.00089	-0.000205369	-0.015248	-0.00679961	0.000278737	0.0166954	-0.913306		1.00045	-9.70958e-05	0.000108273	-9.7786e-05	0.000107583
2016-12-11	345	0.984688	1.47307e+08	0.96961	0.984631	0.969497	0.984659	0.969554	0.984602	0.969441	1.00034	1.00055	2.00088	-0.000213214	-0.0153631	-0.00653635	0.000278748	0.0166957	-0.920179		1.00045	-0.000101173	0.000112041	-0.000101863	0.00011135
2016-12-12	346	0.984574	1.4729e+08	0.969385	0.984519	0.969277	0.984546	0.969331	0.984491	0.969223	1.00033	1.00055	2.00088	-0.000220612	-0.0154735	-0.00627098	0.000278754	0.0166959	-0.926782		1.00045	-0.000104817	0.000115795	-0.000105507	0.000115105
2016-12-13	347	0.984464	1.47274e+08	0.96917	0.984412	0.969066	0.984438	0.969118	0.984386	0.969015	1.00033	1.00056	2.00088	-0.000228097	-0.0155794	-0.00600389	0.000278764	0.0166962	-0.933108		1.00045	-0.000108627	0.00011947	-0.000109317	0.00011878
2016-12-14	348	0.984359	1.47258e+08	0.968963	0.984309	0.968865	0.984334	0.968914	0.984284	0.968816	1.00032	1.00056	2.00088	-0.000235201	-0.0156807	-0.00573497	0.000278774	0.0166965	-0.939159		1.00045	-0.00011216	0.000123041	-0.00011285	0.000122351
2016-12-15	349	0.984259	1.47243e+08	0.968767	0.984212	0.968673	0.984236	0.96872	0.984188	0.968626	1.00032	1.00056	2.00088	-0.000242006	-0.0157773	-0.00546428	0.000278782	0.0166968	-0.944932		1.00045	-0.000115569	0.000126438	-0.000116259	0.000125748
2016-12-16	350	0.984164	1.47229e+08	0.968579	0.984119	0.96849	0.984142	0.968535	0.984096	0.968446	1.00032	1.00057	2.00088	-0.000248671	-0.0158693	-0.00519204	0.000278793	0.0166971	-0.950425		1.00045	-0.000118956	0.000129715	-0.000119646	0.000129025
2016-12-17	351	0.984074	1.47215e+08	0.968401	0.984031	0.968318	0.984053	0.968359	0.98401	0.968276	1.00031	1.00057	2.00088	-0.000255074	-0.0159567	-0.00491823	0.000278805	0.0166974	-0.955636		1.00045	-0.000122175	0.000132899	-0.000122865	0.000132209
2016-12-18	352	0.983989	1.47203e+08	0.968234	0.983948	0.968154	0.983968	0.968194	0.983928	0.968114	1.00031	1.00057	2.00088	-0.00026103	-0.0160392	-0.004643	0.000278812	0.0166977	-0.960563		1.00045	-0.000125084	0.000135946	-0.000125774	0.000135256
2016-12-19	353	0.983908	1.47191e+08	0.968075	0.98387	0.968	0.983889	0.968037	0.983851	0.967963	1.00031	1.00058	2.00088	-0.000266758	-0.0161171	-0.00436638	0.000278827	0.0166981	-0.965206		1.00045	-0.000127976	0.000138781	-0.000128667	0.000138091
2016-12-20	354	0.983832	1.47179e+08	0.967926	0.983797	0.967856	0.983814	0.967891	0.983779	0.967821	1.00031	1.00058	2.00088	-0.00027237	-0.0161903	-0.0040884	0.00027884	0.0166985	-0.969564		1.00045	-0.000130812	0.000141559	-0.000131502	0.000140869
2016-12-21	355	0.983761	1.47169e+08	0.967786	0.983728	0.967721	0.983745	0.967754	0.983712	0.967689	1.0003	1.00058	2.00088	-0.000277676	-0.0162585	-0.00380914	0.00027885	0.0166988	-0.973636		1.00045	-0.000133596	0.000144081	-0.000134286	0.000143391
2016-12-22	356	0.983695	1.47159e+08	0.967656	0.983665	0.967597	0.98368	0.967626	0.98365	0.967567	1.0003	1.00058	2.00088	-0.000282899	-0.0163221	-0.00352889	0.000278865	0.0166993	-0.977417		1.00045	-0.000136273	0.000146627	-0.000136963	0.000145937
2016-12-23	357	0.983634	1.4715e+08	0.967537	0.983606	0.967482	0.98362	0.967509	0.983592	0.967454	1.0003	1.00059	2.00088	-0.00028735	-0.0163808	-0.00324751	0.000278877	0.0166996	-0.980909		1.00045	-0.000138753	0.000148597	-0.000139443	0.000147907
2016-12-24	358	0.983578	1.47141e+08	0.967426	0.983553	0.967376	0.983566	0.967401	0.98354	0.967351	1.0003	1.00059	2.00088	-0.000291881	-0.0164346	-0.00296516	0.000278889	0.0167	-0.984111		1.00045	-0.000141286	0.000150595	-0.000141976	0.000149905
2016-12-25	359	0.983527	1.47134e+08	0.967326	0.983504	0.967281	0.983516	0.967304	0.983493	0.967258	1.00029	1.00059	2.00088	-0.00029587	-0.0164836	-0.00268196	0.000278902	0.0167004	-0.987021		1.00045	-0.000143622	0.000152248	-0.000144313	0.000151557
2016-12-26	360	0.983482	1.47127e+08	0.967236	0.983461	0.967196	0.983471	0.967216	0.983451	0.967176	1.00029	1.00059	2.00088	-0.000299398	-0.0165277	-0.00239791	0.000278914	0.0167007	-0.989639		1.00044	-0.000145767	0.000153631	-0.000146457	0.000152941
2016-12-27	361	0.983441	1.47121e+08	0.967155	0.983423	0.96712	0.983432	0.967138	0.983414	0.967102	1.00029	1.00059	2.00088	-0.000302792	-0.0165669	-0.0021132	0.000278927	0.0167011	-0.991963		1.00044	-0.000147819	0.000154973	-0.000148509	0.000154283
2016-12-28	362	0.983405	1.47115e+08	0.967085	0.983389	0.967054	0.983397	0.96707	0.983382	0.967039	1.00029	1.00059	2.00088	-0.000305905	-0.0166012	-0.0018279	0.000278941	0.0167015	-0.993993		1.00044	-0.000149979	0.000155925	-0.000150669	0.000155235
2016-12-29	363	0.983374	1.47111e+08	0.967024	0.983361	0.966999	0.983367	0.967012	0.983355	0.966986	1.00029	1.00059	2.00088	-0.000308718	-0.0166305	-0.00154204	0.000278951	0.0167018	-0.995729		1.00044	-0.000151755	0.000156963	-0.000152445	0.000156273
2016-12-30	364	0.983348	1.47107e+08	0.966974	0.983338	0.966954	0.983343	0.966964	0.983333	0.966943	1.00028	1.00059	2.00088	-0.000310905	-0.0166549	-0.00125561	0.000278961	0.0167021	-0.99717		1.00044	-0.000153343	0.000157563	-0.000154033	0.000156873
2016-12-31	365	0.983328	1.47104e+08	0.966933	0.983319	0.966916	0.983323	0.966925	0.983314	0.966907	1.00028	1.0006	2.00088	-0.000312943	-0.0166744	-0.000968913	0.000278973	0.0167025	-0.998316		1.00044	-0.000154893	0.000158051	-0.000155583	0.000157361

## Sheet: Detailed Work on Landsat Data
Data calculated based on Earth-Sun distance (d) in astronomical units for Day of the Year (DOY)
Date	DOY	Data Point	d [au]	d [km]	d^2 [au^2]	k1(phi) [au^2]	k2(phi) [au^2]	k3(phi) [au^2]	k4(phi) [au^2]	k1(phi)+k2(phi) [au^2]	k1(phi)-k2(phi) [au^2]	k3(phi)^2+k4(phi)^2 [au^4]	sqrt[k3(phi)^2+k4(phi)^2] [au^2]	f [l(Phi)^2] = {[k1(phi)+k2(phi)] - MIN[ k1(phi)+k2(phi) ]} / 2 [au^2]	k1(phi) - f [l(Phi)^2] [au^2]	k2(phi) - f [l(Phi)^2] [au^2]	cos(2.phi+phi0) = [ k1(phi)-k2(phi) ] / {2.r1.r2.[1-cos(beta)]}	2.phi+phi0 [radians]	2.phi+phi0 [degrees]	phi [radians] phi0 = 2,63736997198951 radians	phi [degrees] phi0 = 151.11 degrees	phi [radians] (valid soln) phi0 = -2,63736997198951 radians	phi [degrees] (valid soln) phi0 = -151.11 degrees	cos(phi)	sin(phi)	phi+phi0 [radians] phi0 = -2,63736997198951 radians	phi+phi0 [degrees] phi0 = -151.11 degrees	cos(phi+phi0)	sin(phi+phi0)	a.l(phi) = k3(phi).cos(phi) - k4(phi).sin(phi) [au^2]	b.l(phi) = k3(phi).sin(phi) + k4(phi).cos(phi) [au^2]	cos(xi) = a.l(phi) / Sqrt{ [a.l(phi)]^2 + [b.l(phi)]^2 }	sin(xi) = b.l(phi) / Sqrt{ [a.l(phi)]^2 + [b.l(phi)]^2 }	xi(phi) [radians]	xi(phi) [degrees]	cos(xi-phi) = a.l(phi) / Sqrt{ [a.l(phi)]^2 + [b.l(phi)]^2 }	sin(xi-phi) = b.l(phi) / Sqrt{ [a.l(phi)]^2 + [b.l(phi)]^2 }	[xi(phi) - phi] [radians]	[xi(phi) - phi] [degrees]	l(phi)^2 = k1(phi) - b^2 - 2.r1.r2.[1-cos(beta)] .cos(phi).cos(phi+phi0) [au^2]	l(phi) [au]	l(phi) [km]	c1_1(phi) = { [r1.cos(phi0) - r2]_1.a.l(phi) - [r1.sin(phi0)]_1.b.l(phi) } / { r1^2.Cos(Beta) - r1.r2.Cos(Phi0) .[1 + Cos(Beta)] + r2^2 }_1 [au]	c1_2(phi) = { [r1.cos(phi0) - r2]_2.a.l(phi) - [r1.sin(phi0)]_2.b.l(phi) } / { r1^2.Cos(Beta) - r1.r2.Cos(Phi0) .[1 + Cos(Beta)] + r2^2 }_2 [au]	c1_3(phi) = { [r1.cos(phi0) - r2]_3.a.l(phi) - [r1.sin(phi0)]_3.b.l(phi) } / { r1^2.Cos(Beta) - r1.r2.Cos(Phi0) .[1 + Cos(Beta)] + r2^2 }_3 [au]	c1_4(phi) = { [r1.cos(phi0) - r2]_4.a.l(phi) - [r1.sin(phi0)]_4.b.l(phi) } / { r1^2.Cos(Beta) - r1.r2.Cos(Phi0) .[1 + Cos(Beta)] + r2^2 }_4 [au]	c3_1(phi) = { [r1.cos(beta).sin(phi0)]_1.a.l(phi) + [r1.cos(beta).cos(phi0) - r2]_1.b.l(phi) } / { r1^2.Cos(Beta) - r1.r2.Cos(Phi0) .[1 + Cos(Beta)] + r2^2 }_1 [au]	c3_2(phi) = { [r1.cos(beta).sin(phi0)]_2.a.l(phi) + [r1.cos(beta).cos(phi0) - r2]_2.b.l(phi) } / { r1^2.Cos(Beta) - r1.r2.Cos(Phi0) .[1 + Cos(Beta)] + r2^2 }_2 [au]	c3_3(phi) = { [r1.cos(beta).sin(phi0)]_3.a.l(phi) + [r1.cos(beta).cos(phi0) - r2]_3.b.l(phi) } / { r1^2.Cos(Beta) - r1.r2.Cos(Phi0) .[1 + Cos(Beta)] + r2^2 }_3 [au]
2016-01-01	1	1	0.98331	1.47101e+08	0.966898	1.00028	1.0006	-0.0166901	-0.000682128	2.00087	-0.000317145	0.000279024	0.016704	-2.22045e-16	1.00028	1.0006	-1	-3.14159	-180	-2.88948	-165.555	-0.252111	-14.4449	0.968388	-0.249449	-2.88948	-165.555	-0.968388	-0.249449	-0.0163326	0.00350276	-0.977767	0.209696	2.93033	167.895	-0.999166	-0.0408362	3.18244	182.34	0.000273511	0.0165382	2.47407e+06	0.0174354	0.0174354	-0.0174308	-0.0174308	0.00480701	0.00480701	0.00482386
		2	0.983308	1.47101e+08	0.966894	1.00028	1.0006	-0.0166926	-0.000610407	2.00087	-0.000316644	0.000279014	0.0167037	4.07733e-07	1.00028	1.0006	-0.998422	-3.0854	-176.78	-2.86138	-163.945	-0.224014	-12.8351	0.975014	-0.222145	-2.86138	-163.945	-0.960998	-0.276556	-0.0164111	0.00311302	-0.98248	0.186367	2.95413	169.259	-0.999332	-0.0365431	3.17814	182.094	0.000273919	0.0165505	2.47592e+06	0.0173054	0.0173054	-0.0173004	-0.0173004	0.00518621	0.00518621	0.00520294
		3	0.983305	1.471e+08	0.96689	1.00028	1.0006	-0.0166951	-0.000538598	2.00088	-0.000315979	0.000279015	0.0167037	7.33041e-07	1.00028	1.00059	-0.996323	-3.05581	-175.085	-2.84659	-163.098	-0.209221	-11.9875	0.978193	-0.207698	-2.84659	-163.098	-0.956802	-0.290741	-0.0164429	0.00294068	-0.984381	0.176049	2.96462	169.86	-0.99948	-0.0322441	3.17384	181.848	0.000274244	0.0165603	2.47739e+06	0.0172452	0.0172452	-0.01724	-0.01724	0.00535248	0.00535248	0.00536915
		4	0.983303	1.471e+08	0.966885	1.00028	1.0006	-0.016697	-0.000466789	2.00087	-0.000316467	0.000279007	0.0167035	4.91615e-07	1.00028	1.0006	-0.997864	-3.07622	-176.254	-2.85679	-163.682	-0.219423	-12.572	0.976023	-0.217667	-2.85679	-163.682	-0.959718	-0.280965	-0.0163982	0.00317878	-0.981725	0.190306	2.95012	169.029	-0.999609	-0.0279456	3.16954	181.601	0.000274003	0.016553	2.4763e+06	0.0173278	0.0173278	-0.0173228	-0.0173228	0.00512242	0.00512242	0.00513917
2016-01-02	2	5	0.983301	1.471e+08	0.966881	1.00028	1.0006	-0.0166989	-0.00039498	2.00087	-0.000316966	0.000279009	0.0167036	2.55347e-07	1.00028	1.0006	-0.999437	-3.10803	-178.077	-2.8727	-164.594	-0.235329	-13.4834	0.972438	-0.233163	-2.8727	-164.594	-0.964065	-0.265665	-0.0163307	0.00350948	-0.977679	0.210103	2.92991	167.872	-0.99972	-0.0236464	3.16524	181.355	0.000273766	0.0165459	2.47523e+06	0.0174371	0.0174371	-0.0174325	-0.0174325	0.00480021	0.00480021	0.00481706
		6	0.9833	1.471e+08	0.966879	1.00028	1.0006	-0.0167002	-0.000323171	2.00087	-0.000316296	0.000279002	0.0167034	6.14216e-07	1.00028	1.0006	-0.997322	-3.06839	-175.806	-2.85288	-163.458	-0.215509	-12.3478	0.976868	-0.213845	-2.85288	-163.458	-0.958611	-0.284719	-0.016383	0.00325556	-0.980822	0.194905	2.94543	168.761	-0.999813	-0.0193477	3.16094	181.109	0.000274125	0.0165567	2.47685e+06	0.0173536	0.0173536	-0.0173487	-0.0173487	0.00504783	0.00504783	0.0050646
		7	0.983299	1.47099e+08	0.966877	1.00028	1.0006	-0.0167016	-0.000251312	2.00088	-0.000315535	0.000279005	0.0167034	9.28212e-07	1.00028	1.00059	-0.994924	-3.04079	-174.224	-2.83908	-162.667	-0.20171	-11.5571	0.979725	-0.200345	-2.83908	-162.667	-0.954591	-0.29792	-0.0164133	0.00309986	-0.982629	0.185582	2.95493	169.305	-0.999887	-0.0150455	3.15664	180.862	0.000274439	0.0165662	2.47827e+06	0.0173006	0.0173006	-0.0172956	-0.0172956	0.00519881	0.00519881	0.00521553
		8	0.983298	1.47099e+08	0.966875	1.00028	1.0006	-0.0167023	-0.000179453	2.00087	-0.000316056	0.000278997	0.0167032	6.11932e-07	1.00028	1.00059	-0.996565	-3.05869	-175.25	-2.84803	-163.18	-0.21066	-12.0699	0.977893	-0.209105	-2.84803	-163.18	-0.957219	-0.289365	-0.0163705	0.00331704	-0.980083	0.198587	2.94168	168.546	-0.999942	-0.0107436	3.15234	180.616	0.000274123	0.0165567	2.47684e+06	0.017374	0.017374	-0.0173692	-0.0173692	0.00498797	0.00498797	0.00500476
2016-01-03	3	9	0.983297	1.47099e+08	0.966873	1.00028	1.0006	-0.0167029	-0.000107632	2.00087	-0.000316512	0.000279	0.0167033	2.63305e-07	1.00028	1.0006	-0.998003	-3.07839	-176.379	-2.85788	-163.744	-0.220509	-12.6342	0.975786	-0.218726	-2.85788	-163.744	-0.960023	-0.279923	-0.0163221	0.00354835	-0.977175	0.212434	2.92753	167.735	-0.999979	-0.00644376	3.14804	180.369	0.000273774	0.0165461	2.47527e+06	0.0174493	0.0174493	-0.0174447	-0.0174447	0.00476198	0.00476198	0.00477884
		10	0.983297	1.47099e+08	0.966874	1.00028	1.0006	-0.016703	-3.58107e-05	2.00087	-0.000315675	0.000278991	0.016703	5.71269e-07	1.00028	1.00059	-0.995365	-3.04528	-174.482	-2.84132	-162.796	-0.203954	-11.6857	0.979273	-0.202543	-2.84132	-162.796	-0.955257	-0.295776	-0.016364	0.00334801	-0.979705	0.200443	2.93978	168.437	-0.999998	-0.00214396	3.14374	180.123	0.000274082	0.0165554	2.47666e+06	0.0173841	0.0173841	-0.0173793	-0.0173793	0.0049577	0.0049577	0.0049745
		11	0.983298	1.47099e+08	0.966874	1.00028	1.0006	-0.016703	3.59607e-05	2.00088	-0.000314949	0.000278993	0.0167031	9.34401e-07	1.00028	1.00059	-0.993075	-3.02384	-173.253	-2.83061	-162.182	-0.193236	-11.0716	0.981388	-0.192036	-2.83061	-162.182	-0.952032	-0.305998	-0.0163853	0.00324287	-0.980972	0.194148	2.9462	168.805	-0.999998	0.00215294	3.13944	179.877	0.000274445	0.0165664	2.4783e+06	0.017349	0.017349	-0.0173442	-0.0173442	0.00506002	0.00506002	0.00507678
		12	0.983298	1.47099e+08	0.966875	1.00028	1.0006	-0.0167025	0.000107732	2.00088	-0.000315427	0.000278985	0.0167028	7.05367e-07	1.00028	1.00059	-0.994585	-3.03748	-174.035	-2.83742	-162.572	-0.200053	-11.4622	0.980056	-0.198722	-2.83742	-162.572	-0.954096	-0.299501	-0.016348	0.00342473	-0.978754	0.205039	2.93509	168.168	-0.999979	0.00644993	3.13514	179.63	0.000274216	0.0165595	2.47726e+06	0.017409	0.017409	-0.0174043	-0.0174043	0.00488275	0.00488275	0.00489958
2016-01-04	4	13	0.983298	1.47099e+08	0.966876	1.00028	1.0006	-0.0167019	0.000179491	2.00087	-0.000315891	0.000278987	0.0167029	4.68977e-07	1.00028	1.00059	-0.996048	-3.05266	-174.904	-2.84501	-163.007	-0.207643	-11.8971	0.97852	-0.206154	-2.84501	-163.007	-0.956342	-0.292251	-0.0163062	0.00361881	-0.976248	0.216657	2.9232	167.487	-0.999942	0.0107461	3.13085	179.384	0.00027398	0.0165523	2.47619e+06	0.0174712	0.0174712	-0.0174666	-0.0174666	0.0046926	0.0046926	0.00470949
		14	0.9833	1.471e+08	0.966879	1.00028	1.0006	-0.0167008	0.00025125	2.00088	-0.000315161	0.000278979	0.0167027	8.40003e-07	1.00028	1.00059	-0.993745	-3.02969	-173.588	-2.83353	-162.349	-0.196158	-11.239	0.980823	-0.194903	-2.83353	-162.349	-0.952922	-0.303215	-0.0163315	0.00350146	-0.97778	0.209635	2.93039	167.899	-0.999887	0.0150425	3.12655	179.138	0.000274351	0.0165635	2.47787e+06	0.0174337	0.0174337	-0.017429	-0.017429	0.00480762	0.00480762	0.00482447
		15	0.983301	1.471e+08	0.966882	1.00028	1.0006	-0.0166996	0.000323059	2.00088	-0.000314341	0.000278982	0.0167027	1.16618e-06	1.00028	1.00059	-0.99116	-3.00852	-172.376	-2.82295	-161.743	-0.185577	-10.6328	0.98283	-0.184514	-2.82295	-161.743	-0.949661	-0.31328	-0.0163533	0.00339882	-0.979077	0.203489	2.93667	168.259	-0.999813	0.0193417	3.12225	178.892	0.000274677	0.0165734	2.47934e+06	0.0174005	0.0174005	-0.0173957	-0.0173957	0.004908	0.004908	0.00492482
		16	0.983303	1.471e+08	0.966885	1.00028	1.0006	-0.0166979	0.000394867	2.00088	-0.000314726	0.000278975	0.0167025	9.00199e-07	1.00028	1.00059	-0.992373	-3.01801	-172.919	-2.82769	-162.015	-0.190319	-10.9045	0.981944	-0.189173	-2.82769	-162.015	-0.951136	-0.308773	-0.0163217	0.00354652	-0.977197	0.212334	2.92763	167.741	-0.999721	0.0236412	3.11795	178.645	0.000274411	0.0165654	2.47814e+06	0.017448	0.017448	-0.0174433	-0.0174433	0.0047634	0.0047634	0.00478026
2016-01-05	5	17	0.983305	1.471e+08	0.966888	1.00028	1.0006	-0.0166961	0.000466651	2.00087	-0.000315071	0.000278978	0.0167026	6.14356e-07	1.00028	1.00059	-0.993462	-3.02718	-173.444	-2.83227	-162.277	-0.194904	-11.1672	0.981066	-0.193672	-2.83227	-162.277	-0.952541	-0.30441	-0.0162896	0.00369138	-0.975272	0.221006	2.91875	167.232	-0.99961	0.0279388	3.11365	178.399	0.000274125	0.0165567	2.47685e+06	0.0174935	0.0174935	-0.017489	-0.017489	0.00462105	0.00462105	0.00463796
		18	0.983307	1.47101e+08	0.966893	1.00028	1.00059	-0.0166937	0.000538435	2.00088	-0.000314148	0.00027897	0.0167024	9.72816e-07	1.00028	1.00059	-0.990552	-3.00402	-172.118	-2.8207	-161.614	-0.183326	-10.5038	0.983243	-0.1823	-2.8207	-161.614	-0.948953	-0.315418	-0.0163158	0.00357268	-0.976855	0.213902	2.92602	167.649	-0.99948	0.032237	3.10935	178.153	0.000274484	0.0165676	2.47847e+06	0.0174561	0.0174561	-0.0174515	-0.0174515	0.00473766	0.00473766	0.00475453
		19	0.98331	1.47101e+08	0.966899	1.00028	1.00059	-0.0166913	0.000610206	2.00088	-0.000313261	0.000278973	0.0167025	1.34893e-06	1.00028	1.00059	-0.987753	-2.98493	-171.024	-2.81115	-161.067	-0.17378	-9.95685	0.984938	-0.172907	-2.81115	-161.067	-0.945899	-0.324462	-0.0163344	0.00348705	-0.977964	0.208775	2.93127	167.949	-0.999332	0.0365339	3.10505	177.906	0.00027486	0.0165789	2.48017e+06	0.0174289	0.0174289	-0.0174242	-0.0174242	0.00482163	0.00482163	0.00483847
		20	0.983313	1.47102e+08	0.966905	1.00028	1.00059	-0.0166883	0.000681978	2.00088	-0.000313629	0.000278965	0.0167022	1.10747e-06	1.00028	1.00059	-0.988914	-2.99255	-171.461	-2.81496	-161.285	-0.177592	-10.1753	0.984272	-0.17666	-2.81496	-161.285	-0.947129	-0.320853	-0.0163054	0.00361942	-0.976238	0.216702	2.92316	167.485	-0.999166	0.0408315	3.10075	177.66	0.000274618	0.0165716	2.47908e+06	0.0174707	0.0174707	-0.0174662	-0.0174662	0.00469168	0.00469168	0.00470856
2016-01-06	6	21	0.983316	1.47102e+08	0.96691	1.00028	1.00059	-0.0166853	0.000753699	2.00088	-0.000313908	0.000278967	0.0167023	8.21118e-07	1.00028	1.00059	-0.989792	-2.99859	-171.806	-2.81798	-161.458	-0.180609	-10.3481	0.983735	-0.179628	-2.81798	-161.458	-0.948092	-0.317995	-0.0162785	0.00373859	-0.974627	0.223837	2.91584	167.066	-0.998981	0.0451254	3.09645	177.414	0.000274332	0.016563	2.47779e+06	0.0175077	0.0175077	-0.0175033	-0.0175033	0.00457435	0.00457435	0.00459127
		22	0.98332	1.47103e+08	0.966918	1.00028	1.00059	-0.0166817	0.00082542	2.00088	-0.000312942	0.000278959	0.0167021	1.16678e-06	1.00028	1.00059	-0.986749	-2.97862	-170.662	-2.80799	-160.886	-0.170624	-9.77605	0.985479	-0.169798	-2.80799	-160.886	-0.94487	-0.327445	-0.0162993	0.00364594	-0.975883	0.218293	2.92153	167.391	-0.998778	0.0494202	3.09215	177.167	0.000274678	0.0165734	2.47935e+06	0.0174788	0.0174788	-0.0174743	-0.0174743	0.00466551	0.00466551	0.0046824
		23	0.983324	1.47103e+08	0.966926	1.00028	1.00059	-0.016678	0.000897166	2.00088	-0.000311938	0.000278961	0.0167021	1.49261e-06	1.00028	1.00059	-0.983581	-2.96013	-169.603	-2.79875	-160.357	-0.16138	-9.24639	0.987006	-0.16068	-2.79875	-160.357	-0.941803	-0.336166	-0.0163171	0.00356534	-0.97695	0.213466	2.92647	167.674	-0.998556	0.0537157	3.08785	176.921	0.000275004	0.0165832	2.48082e+06	0.0174535	0.0174535	-0.0174489	-0.0174489	0.00474473	0.00474473	0.0047616
		24	0.983328	1.47104e+08	0.966934	1.00028	1.00059	-0.0166738	0.000968912	2.00088	-0.000312112	0.000278954	0.0167019	1.23902e-06	1.00028	1.00059	-0.984131	-2.96321	-169.779	-2.80029	-160.445	-0.162918	-9.33454	0.986758	-0.162199	-2.80029	-160.445	-0.942319	-0.334716	-0.0162958	0.00366055	-0.975687	0.219169	2.92063	167.34	-0.998316	0.0580121	3.08355	176.674	0.00027475	0.0165756	2.47967e+06	0.0174832	0.0174832	-0.0174787	-0.0174787	0.00465106	0.00465106	0.00466796
2016-01-07	7	25	0.983332	1.47104e+08	0.966943	1.00028	1.00059	-0.0166696	0.00104057	2.00088	-0.000312122	0.000278957	0.016702	9.02964e-07	1.00028	1.00059	-0.984162	-2.96338	-169.789	-2.80037	-160.45	-0.163004	-9.33945	0.986744	-0.162283	-2.80037	-160.45	-0.942348	-0.334636	-0.0162797	0.00373197	-0.974717	0.223444	2.91625	167.089	-0.998057	0.0623022	3.07925	176.428	0.000274414	0.0165654	2.47816e+06	0.0175054	0.0175054	-0.017501	-0.017501	0.00458073	0.00458073	0.00459765
		26	0.983338	1.47105e+08	0.966953	1.00028	1.00059	-0.0166647	0.00111223	2.00088	-0.000310863	0.000278949	0.0167018	1.21123e-06	1.00028	1.00059	-0.980194	-2.94223	-168.578	-2.7898	-159.844	-0.152432	-8.7337	0.988405	-0.151842	-2.7898	-159.844	-0.938757	-0.34458	-0.0163026	0.00362974	-0.976099	0.217326	2.92252	167.448	-0.99778	0.0665935	3.07495	176.182	0.000274722	0.0165747	2.47955e+06	0.0174735	0.0174735	-0.0174689	-0.0174689	0.0046813	0.0046813	0.00469819
		27	0.983343	1.47106e+08	0.966964	1.00028	1.00059	-0.0166598	0.00118384	2.00088	-0.000309715	0.000278951	0.0167018	1.57461e-06	1.00028	1.00059	-0.976573	-2.92471	-167.573	-2.78104	-159.342	-0.14367	-8.23167	0.989697	-0.143176	-2.78104	-159.342	-0.935702	-0.352792	-0.0163187	0.00355693	-0.97706	0.212966	2.92698	167.704	-0.997485	0.0708807	3.07065	175.935	0.000275086	0.0165857	2.48119e+06	0.0174506	0.0174506	-0.017446	-0.017446	0.00475284	0.00475284	0.00476971
		28	0.983349	1.47107e+08	0.966975	1.00028	1.00059	-0.0166544	0.00125545	2.00088	-0.000309772	0.000278944	0.0167016	1.34585e-06	1.00028	1.00059	-0.976751	-2.92554	-167.621	-2.78145	-159.366	-0.144084	-8.2554	0.989638	-0.143586	-2.78145	-159.366	-0.935848	-0.352404	-0.0163015	0.00363377	-0.976045	0.21757	2.92227	167.434	-0.997171	0.0751691	3.06635	175.689	0.000274857	0.0165788	2.48015e+06	0.0174746	0.0174746	-0.0174701	-0.0174701	0.00467726	0.00467726	0.00469415
2016-01-08	8	29	0.983354	1.47108e+08	0.966985	1.00028	1.00059	-0.0166489	0.00132703	2.00088	-0.000309788	0.000278947	0.0167017	1.0972e-06	1.00028	1.00059	-0.976803	-2.92578	-167.635	-2.78158	-159.373	-0.144206	-8.26238	0.98962	-0.143706	-2.78158	-159.373	-0.935891	-0.35229	-0.0162854	0.00370581	-0.975073	0.221882	2.91785	167.18	-0.996838	0.0794547	3.06205	175.443	0.000274608	0.0165713	2.47903e+06	0.0174971	0.0174971	-0.0174926	-0.0174926	0.00460638	0.00460638	0.00462329
		30	0.983361	1.47109e+08	0.966998	1.00028	1.00059	-0.0166428	0.00139861	2.00088	-0.000308635	0.00027894	0.0167015	1.44373e-06	1.00028	1.00059	-0.973166	-2.90941	-166.697	-2.77339	-158.904	-0.13602	-7.79337	0.990764	-0.135601	-2.77339	-158.904	-0.932976	-0.359939	-0.0162995	0.00364248	-0.975928	0.218093	2.92173	167.403	-0.996487	0.0837417	3.05775	175.196	0.000274955	0.0165818	2.4806e+06	0.0174772	0.0174772	-0.0174727	-0.0174727	0.00466864	0.00466864	0.00468553
		31	0.983367	1.4711e+08	0.967011	1.00028	1.00059	-0.0166368	0.00147013	2.00088	-0.000307616	0.000278944	0.0167016	1.85783e-06	1.00028	1.00059	-0.969956	-2.89584	-165.92	-2.76661	-158.515	-0.129237	-7.40476	0.99166	-0.128878	-2.76661	-158.515	-0.930513	-0.366259	-0.0163086	0.00360199	-0.976467	0.215667	2.92422	167.545	-0.996118	0.0880234	3.05346	174.95	0.000275369	0.0165942	2.48246e+06	0.0174646	0.0174646	-0.0174601	-0.0174601	0.0047085	0.0047085	0.00472538
		32	0.983374	1.47111e+08	0.967024	1.00028	1.00059	-0.0166301	0.00154165	2.00088	-0.000307905	0.000278937	0.0167014	1.62898e-06	1.00028	1.00059	-0.970864	-2.89961	-166.135	-2.76849	-158.623	-0.131118	-7.51253	0.991416	-0.130743	-2.76849	-158.623	-0.9312	-0.364508	-0.0162858	0.00370269	-0.975115	0.221699	2.91804	167.191	-0.995731	0.0923069	3.04915	174.704	0.00027514	0.0165873	2.48143e+06	0.0174958	0.0174958	-0.0174913	-0.0174913	0.0046093	0.0046093	0.00462621
2016-01-09	9	33	0.983381	1.47112e+08	0.967037	1.00028	1.00059	-0.0166234	0.00161309	2.00088	-0.000308027	0.000278939	0.0167015	1.31763e-06	1.00028	1.00059	-0.971251	-2.90123	-166.228	-2.7693	-158.669	-0.13193	-7.55901	0.99131	-0.131547	-2.7693	-158.669	-0.931496	-0.363752	-0.0162667	0.00378583	-0.97397	0.226676	2.91293	166.899	-0.995325	0.0965836	3.04486	174.458	0.000274829	0.016578	2.48003e+06	0.0175213	0.0175213	-0.0175169	-0.0175169	0.00452729	0.00452729	0.00454423
		34	0.983389	1.47113e+08	0.967053	1.00029	1.00059	-0.016616	0.00168452	2.00088	-0.000306808	0.000278929	0.0167012	1.68749e-06	1.00028	1.00059	-0.967407	-2.88558	-165.332	-2.76147	-158.221	-0.124105	-7.11069	0.992309	-0.123787	-2.76147	-158.221	-0.928621	-0.37103	-0.0162797	0.0037284	-0.974763	0.223242	2.91645	167.1	-0.9949	0.100862	3.04056	174.211	0.000275199	0.0165891	2.4817e+06	0.0175035	0.0175035	-0.0174991	-0.0174991	0.00458384	0.00458384	0.00460076
		35	0.983397	1.47114e+08	0.967069	1.00029	1.00059	-0.0166086	0.00175595	2.00088	-0.000305599	0.00027893	0.0167012	2.06251e-06	1.00028	1.00059	-0.963595	-2.87093	-164.492	-2.75415	-157.801	-0.116782	-6.69111	0.993189	-0.116517	-2.75415	-157.801	-0.925879	-0.37782	-0.0162909	0.00367918	-0.975434	0.220294	2.91948	167.274	-0.994457	0.105139	3.03626	173.965	0.000275574	0.0166004	2.48339e+06	0.0174883	0.0174883	-0.0174838	-0.0174838	0.00463237	0.00463237	0.00464927
		36	0.983405	1.47115e+08	0.967085	1.00029	1.00059	-0.0166007	0.00182739	2.00088	-0.000305544	0.000278922	0.016701	1.87085e-06	1.00028	1.00059	-0.963421	-2.87028	-164.455	-2.75383	-157.783	-0.116456	-6.67244	0.993227	-0.116193	-2.75383	-157.783	-0.925756	-0.378122	-0.0162759	0.00374389	-0.97455	0.224172	2.9155	167.046	-0.993996	0.109418	3.03196	173.718	0.000275382	0.0165946	2.48252e+06	0.017508	0.017508	-0.0175036	-0.0175036	0.00456845	0.00456845	0.00458537
2016-01-10	10	37	0.983413	1.47116e+08	0.9671	1.00029	1.00059	-0.0165927	0.00189872	2.00088	-0.000305298	0.000278924	0.016701	1.58412e-06	1.00028	1.00059	-0.962646	-2.86741	-164.29	-2.75239	-157.7	-0.115018	-6.59006	0.993393	-0.114765	-2.75239	-157.7	-0.925211	-0.379452	-0.0162652	0.00379044	-0.973904	0.226958	2.91264	166.882	-0.993516	0.113689	3.02766	173.472	0.000275095	0.016586	2.48123e+06	0.0175223	0.0175223	-0.0175179	-0.0175179	0.00452252	0.00452252	0.00453945
		38	0.983422	1.47118e+08	0.967118	1.00029	1.00059	-0.0165842	0.00197005	2.00088	-0.000303882	0.000278917	0.0167008	1.8926e-06	1.00028	1.00059	-0.958182	-2.85138	-163.372	-2.74437	-157.241	-0.107003	-6.13082	0.994281	-0.106799	-2.74437	-157.241	-0.92214	-0.386856	-0.0162789	0.00372996	-0.974741	0.22334	2.91635	167.095	-0.993018	0.117962	3.02336	173.226	0.000275404	0.0165953	2.48262e+06	0.0175036	0.0175036	-0.0174992	-0.0174992	0.00458212	0.00458212	0.00459904
		39	0.983431	1.47119e+08	0.967137	1.00029	1.00059	-0.0165757	0.00204131	2.00088	-0.000302627	0.000278919	0.0167009	2.28111e-06	1.00029	1.00059	-0.954222	-2.83784	-162.596	-2.73761	-156.853	-0.100236	-5.74313	0.994981	-0.100069	-2.73761	-156.853	-0.919501	-0.393087	-0.0162882	0.00368977	-0.975289	0.220933	2.91882	167.236	-0.992502	0.122228	3.01906	172.979	0.000275792	0.016607	2.48437e+06	0.0174913	0.0174913	-0.0174868	-0.0174868	0.00462178	0.00462178	0.00463868
		40	0.98344	1.47121e+08	0.967155	1.00029	1.00059	-0.0165665	0.00211257	2.00088	-0.000302575	0.000278913	0.0167007	2.07753e-06	1.00029	1.00059	-0.954059	-2.8373	-162.565	-2.73734	-156.838	-0.0999653	-5.72759	0.995008	-0.0997988	-2.73734	-156.838	-0.919395	-0.393336	-0.016273	0.00375534	-0.974391	0.224862	2.91479	167.005	-0.991967	0.126496	3.01476	172.733	0.000275589	0.0166009	2.48345e+06	0.0175113	0.0175113	-0.0175068	-0.0175068	0.00455701	0.00455701	0.00457394
2016-01-11	11	41	0.983449	1.47122e+08	0.967173	1.00029	1.00059	-0.0165574	0.00218375	2.00088	-0.000302383	0.000278916	0.0167008	1.80392e-06	1.00029	1.00059	-0.953454	-2.83529	-162.45	-2.73633	-156.78	-0.0989588	-5.66992	0.995108	-0.0987974	-2.73633	-156.78	-0.918998	-0.394261	-0.0162606	0.00380889	-0.973645	0.228067	2.9115	166.817	-0.991414	0.130757	3.01046	172.487	0.000275315	0.0165926	2.48222e+06	0.0175276	0.0175276	-0.0175233	-0.0175233	0.00450415	0.00450415	0.00452109
		42	0.98346	1.47124e+08	0.967193	1.00029	1.00059	-0.0165476	0.00225493	2.00088	-0.000300923	0.000278908	0.0167005	2.17471e-06	1.00029	1.00059	-0.948849	-2.82037	-161.595	-2.72887	-156.353	-0.0914988	-5.2425	0.995817	-0.0913712	-2.72887	-156.353	-0.916032	-0.401106	-0.0162724	0.00375748	-0.974361	0.224991	2.91466	166.998	-0.990843	0.135022	3.00616	172.24	0.000275686	0.0166038	2.48389e+06	0.0175118	0.0175118	-0.0175074	-0.0175074	0.00455484	0.00455484	0.00457176
		43	0.98347	1.47125e+08	0.967214	1.00029	1.00059	-0.0165378	0.00232605	2.00088	-0.000299597	0.00027891	0.0167006	2.61303e-06	1.00029	1.00059	-0.944669	-2.80738	-160.851	-2.72238	-155.981	-0.0850054	-4.87045	0.996389	-0.0849031	-2.72238	-155.981	-0.913408	-0.407046	-0.0162806	0.00372177	-0.974852	0.222852	2.91685	167.123	-0.990253	0.13928	3.00186	171.994	0.000276124	0.016617	2.48586e+06	0.0175009	0.0175009	-0.0174965	-0.0174965	0.00459011	0.00459011	0.00460702
		44	0.983481	1.47127e+08	0.967235	1.00029	1.00059	-0.0165275	0.00239717	2.00088	-0.00029945	0.000278904	0.0167004	2.47199e-06	1.00029	1.00059	-0.944206	-2.80597	-160.77	-2.72167	-155.94	-0.0843012	-4.83011	0.996449	-0.0842014	-2.72167	-155.94	-0.913121	-0.407689	-0.0162669	0.0037803	-0.974044	0.22636	2.91325	166.917	-0.989645	0.14354	2.99756	171.747	0.000275983	0.0166127	2.48523e+06	0.0175186	0.0175186	-0.0175142	-0.0175142	0.00453224	0.00453224	0.00454917
2016-01-12	12	45	0.983491	1.47128e+08	0.967255	1.00029	1.00059	-0.0165171	0.00246819	2.00088	-0.000299113	0.000278907	0.0167005	2.23585e-06	1.00029	1.00059	-0.943142	-2.80276	-160.586	-2.72006	-155.848	-0.0826933	-4.73798	0.996583	-0.0825991	-2.72006	-155.848	-0.912464	-0.409156	-0.0162568	0.00382406	-0.973431	0.228979	2.91056	166.763	-0.989019	0.147792	2.99326	171.501	0.000275747	0.0166056	2.48417e+06	0.0175319	0.0175319	-0.0175276	-0.0175276	0.00448902	0.00448902	0.00450596
		46	0.983503	1.4713e+08	0.967278	1.00029	1.00059	-0.0165061	0.00253921	2.00088	-0.000297556	0.0002789	0.0167003	2.61953e-06	1.00029	1.00059	-0.938233	-2.78828	-159.757	-2.71283	-155.434	-0.0754567	-4.32335	0.997154	-0.0753851	-2.71283	-155.434	-0.909479	-0.415749	-0.0162678	0.00377631	-0.974099	0.226122	2.9135	166.931	-0.988373	0.152046	2.98895	171.254	0.000276131	0.0166172	2.48589e+06	0.0175173	0.0175173	-0.0175129	-0.0175129	0.00453613	0.00453613	0.00455306
		47	0.983515	1.47132e+08	0.967302	1.00029	1.00059	-0.0164952	0.00261016	2.00088	-0.000296158	0.000278903	0.0167004	3.08321e-06	1.00029	1.00058	-0.933826	-2.77576	-159.039	-2.70657	-155.075	-0.0691953	-3.9646	0.997607	-0.0691401	-2.70657	-155.075	-0.906858	-0.421435	-0.0162752	0.00374439	-0.974541	0.22421	2.91546	167.044	-0.987711	0.156293	2.98466	171.008	0.000276594	0.0166311	2.48798e+06	0.0175076	0.0175076	-0.0175032	-0.0175032	0.00456769	0.00456769	0.00458461
		48	0.983527	1.47133e+08	0.967325	1.00029	1.00059	-0.0164836	0.0026811	2.00088	-0.000296016	0.000278896	0.0167002	2.92944e-06	1.00029	1.00058	-0.933377	-2.77451	-158.968	-2.70594	-155.039	-0.0685685	-3.92868	0.99765	-0.0685148	-2.70594	-155.039	-0.906594	-0.422004	-0.0162611	0.00380417	-0.97371	0.227792	2.91178	166.833	-0.987029	0.160543	2.98035	170.762	0.00027644	0.0166265	2.48729e+06	0.0175256	0.0175256	-0.0175212	-0.0175212	0.00450853	0.00450853	0.00452547
2016-01-13	13	49	0.983538	1.47135e+08	0.967348	1.00029	1.00059	-0.016472	0.0027519	2.00088	-0.000295582	0.000278899	0.0167003	2.63037e-06	1.00029	1.00058	-0.93201	-2.77072	-158.75	-2.70404	-154.93	-0.0666732	-3.82009	0.997778	-0.0666238	-2.70404	-154.93	-0.905793	-0.423721	-0.016252	0.00384321	-0.97316	0.230129	2.90938	166.695	-0.98633	0.164782	2.97606	170.515	0.000276141	0.0166175	2.48594e+06	0.0175374	0.0175374	-0.0175331	-0.0175331	0.00446994	0.00446994	0.00448689
		50	0.983551	1.47137e+08	0.967373	1.00029	1.00059	-0.0164597	0.00282269	2.00088	-0.00029388	0.00027889	0.0167	2.97576e-06	1.00029	1.00058	-0.926642	-2.75618	-157.917	-2.69677	-154.514	-0.0594033	-3.40356	0.998236	-0.0593684	-2.69677	-154.514	-0.902688	-0.430295	-0.0162631	0.0037949	-0.973839	0.227239	2.91235	166.865	-0.985612	0.169023	2.97175	170.269	0.000276487	0.0166279	2.4875e+06	0.0175226	0.0175226	-0.0175183	-0.0175183	0.00451761	0.00451761	0.00453454
		51	0.983564	1.47139e+08	0.967399	1.00029	1.00059	-0.0164475	0.0028934	2.00088	-0.000292362	0.000278892	0.0167001	3.41358e-06	1.00029	1.00058	-0.921855	-2.74364	-157.199	-2.6905	-154.154	-0.0531334	-3.04432	0.998589	-0.0531084	-2.6905	-154.154	-0.899973	-0.435946	-0.0162706	0.00376282	-0.974285	0.225318	2.91432	166.978	-0.984877	0.173257	2.96746	170.023	0.000276925	0.0166411	2.48947e+06	0.0175129	0.0175129	-0.0175085	-0.0175085	0.00454933	0.00454933	0.00456625
		52	0.983578	1.47141e+08	0.967425	1.00029	1.00059	-0.0164347	0.00296411	2.00088	-0.000292022	0.000278884	0.0166998	3.27209e-06	1.00029	1.00058	-0.920784	-2.74088	-157.041	-2.68913	-154.076	-0.0517564	-2.96543	0.998661	-0.0517333	-2.68913	-154.076	-0.899372	-0.437185	-0.0162593	0.00381036	-0.973622	0.228167	2.9114	166.811	-0.984122	0.177493	2.96315	169.776	0.000276783	0.0166368	2.48883e+06	0.0175271	0.0175271	-0.0175228	-0.0175228	0.00450224	0.00450224	0.00451918
2016-01-14	14	53	0.983591	1.47143e+08	0.96745	1.00029	1.00059	-0.0164219	0.00303471	2.00088	-0.000291491	0.000278887	0.0166999	3.03543e-06	1.00029	1.00058	-0.919111	-2.73662	-156.797	-2.68699	-153.953	-0.0496227	-2.84317	0.998769	-0.0496024	-2.68699	-153.953	-0.898437	-0.439103	-0.0162511	0.00384554	-0.973126	0.230273	2.90923	166.687	-0.98335	0.18172	2.95886	169.53	0.000276546	0.0166297	2.48777e+06	0.0175378	0.0175378	-0.0175335	-0.0175335	0.00446746	0.00446746	0.00448441
		54	0.983605	1.47145e+08	0.967479	1.0003	1.00059	-0.0164084	0.00310532	2.00088	-0.00028979	0.00027888	0.0166997	3.39408e-06	1.00029	1.00058	-0.913747	-2.72321	-156.028	-2.68029	-153.569	-0.0429198	-2.45912	0.999079	-0.0429066	-2.68029	-153.569	-0.895473	-0.445115	-0.0162601	0.00380649	-0.973676	0.227938	2.91163	166.824	-0.982559	0.185951	2.95455	169.283	0.000276905	0.0166405	2.48938e+06	0.0175258	0.0175258	-0.0175215	-0.0175215	0.00450599	0.00450599	0.00452293
		55	0.983619	1.47147e+08	0.967507	1.0003	1.00058	-0.016395	0.00317584	2.00088	-0.000288273	0.000278883	0.0166998	3.84514e-06	1.00029	1.00058	-0.908963	-2.71159	-155.362	-2.67448	-153.236	-0.0371084	-2.12615	0.999312	-0.0370998	-2.67448	-153.236	-0.892871	-0.450312	-0.0162659	0.0037819	-0.974019	0.226464	2.91315	166.911	-0.981751	0.190172	2.95025	169.037	0.000277356	0.016654	2.4914e+06	0.0175185	0.0175185	-0.0175141	-0.0175141	0.00453034	0.00453034	0.00454727
		56	0.983633	1.47149e+08	0.967535	1.0003	1.00058	-0.016381	0.00324636	2.00088	-0.000287934	0.000278877	0.0166996	3.71692e-06	1.00029	1.00058	-0.907895	-2.70903	-155.216	-2.6732	-153.163	-0.0358309	-2.05296	0.999358	-0.0358232	-2.6732	-153.163	-0.892295	-0.451452	-0.0162542	0.00383109	-0.973329	0.229412	2.91012	166.738	-0.980923	0.194397	2.94595	168.79	0.000277228	0.0166502	2.49083e+06	0.0175332	0.0175332	-0.0175288	-0.0175288	0.00448161	0.00448161	0.00449856
2016-01-15	15	57	0.983648	1.47152e+08	0.967563	1.0003	1.00058	-0.016367	0.00331672	2.00088	-0.000287304	0.000278881	0.0166997	3.44333e-06	1.00029	1.00058	-0.905908	-2.70432	-154.946	-2.67084	-153.028	-0.0334726	-1.91784	0.99944	-0.0334663	-2.67084	-153.028	-0.891228	-0.453555	-0.0162469	0.00386261	-0.972883	0.231298	2.90818	166.626	-0.980079	0.19861	2.94165	168.544	0.000276954	0.0166419	2.4896e+06	0.0175427	0.0175427	-0.0175384	-0.0175384	0.00445046	0.00445046	0.00446742
		58	0.983663	1.47154e+08	0.967593	1.0003	1.00058	-0.0163524	0.00338709	2.00088	-0.000285405	0.000278873	0.0166995	3.81427e-06	1.00029	1.00058	-0.899918	-2.69038	-154.147	-2.66387	-152.629	-0.0265044	-1.51859	0.999649	-0.0265013	-2.66387	-152.629	-0.888046	-0.459754	-0.0162569	0.00381926	-0.973496	0.228705	2.91085	166.779	-0.979215	0.202826	2.93735	168.298	0.000277325	0.0166531	2.49127e+06	0.0175295	0.0175295	-0.0175251	-0.0175251	0.00449326	0.00449326	0.00451021
		59	0.983679	1.47156e+08	0.967624	1.0003	1.00058	-0.0163378	0.00345736	2.00088	-0.000283714	0.000278876	0.0166996	4.29005e-06	1.0003	1.00058	-0.894588	-2.6783	-153.455	-2.65784	-152.283	-0.0204669	-1.17267	0.999791	-0.0204654	-2.65784	-152.283	-0.885254	-0.465107	-0.0162636	0.003791	-0.973892	0.227012	2.91258	166.879	-0.978334	0.207033	2.93305	168.051	0.000277801	0.0166674	2.4934e+06	0.017521	0.017521	-0.0175167	-0.0175167	0.00452125	0.00452125	0.00453818
		60	0.983694	1.47159e+08	0.967654	1.0003	1.00058	-0.0163225	0.00352763	2.00088	-0.000283252	0.000278869	0.0166994	4.16118e-06	1.0003	1.00058	-0.893132	-2.67506	-153.269	-2.65621	-152.19	-0.0188436	-1.07966	0.999822	-0.0188425	-2.65621	-152.19	-0.884498	-0.466544	-0.0162532	0.00383456	-0.97328	0.229623	2.9099	166.725	-0.977433	0.211243	2.92875	167.805	0.000277672	0.0166635	2.49282e+06	0.017534	0.017534	-0.0175296	-0.0175296	0.00447806	0.00447806	0.00449501
2016-01-16	16	61	0.98371	1.47161e+08	0.967685	1.0003	1.00058	-0.0163073	0.00359777	2.00088	-0.000282549	0.000278871	0.0166994	3.912e-06	1.0003	1.00058	-0.890915	-2.67015	-152.988	-2.65376	-152.049	-0.0163907	-0.93912	0.999866	-0.01639	-2.65376	-152.049	-0.883351	-0.468712	-0.0162461	0.00386457	-0.972854	0.231419	2.90806	166.619	-0.976516	0.215443	2.92445	167.558	0.000277423	0.016656	2.49171e+06	0.017543	0.017543	-0.0175387	-0.0175387	0.00444839	0.00444839	0.00446534
		62	0.983727	1.47163e+08	0.967718	1.0003	1.00058	-0.0162914	0.00366792	2.00088	-0.000280601	0.000278863	0.0166992	4.29509e-06	1.0003	1.00058	-0.884772	-2.6568	-152.223	-2.64709	-151.667	-0.00971555	-0.55666	0.999953	-0.0097154	-2.64709	-151.667	-0.880203	-0.474598	-0.016255	0.00382602	-0.9734	0.229114	2.91043	166.755	-0.97558	0.219646	2.92014	167.312	0.000277806	0.0166675	2.49342e+06	0.0175312	0.0175312	-0.0175269	-0.0175269	0.00448643	0.00448643	0.00450337
		63	0.983743	1.47166e+08	0.967751	1.0003	1.00058	-0.0162755	0.00373795	2.00088	-0.000278886	0.000278865	0.0166993	4.79546e-06	1.0003	1.00058	-0.879366	-2.64533	-151.566	-2.64135	-151.338	-0.00397765	-0.227903	0.999992	-0.00397764	-2.64135	-151.338	-0.877465	-0.479641	-0.0162605	0.00380266	-0.973728	0.227714	2.91186	166.837	-0.974626	0.223839	2.91584	167.065	0.000278306	0.0166825	2.49567e+06	0.0175242	0.0175242	-0.0175199	-0.0175199	0.00450957	0.00450957	0.0045265
		64	0.98376	1.47168e+08	0.967784	1.0003	1.00058	-0.0162591	0.00380798	2.00088	-0.00027835	0.000278858	0.016699	4.71663e-06	1.0003	1.00058	-0.877674	-2.64178	-151.363	-2.63958	-151.237	-0.002207	-0.126452	0.999998	-0.002207	-2.63958	-151.237	-0.876614	-0.481193	-0.0162506	0.00384385	-0.973147	0.230184	2.90933	166.692	-0.973653	0.228036	2.91153	166.819	0.000278228	0.0166802	2.49532e+06	0.0175364	0.0175364	-0.0175321	-0.0175321	0.00446871	0.00446871	0.00448565
2016-01-17	17	65	0.983777	1.47171e+08	0.967817	1.0003	1.00058	-0.0162426	0.00387785	2.00088	-0.000277496	0.00027886	0.0166991	4.47979e-06	1.0003	1.00058	-0.874983	-2.6362	-151.043	-2.63678	-151.077	0.000586733	0.0336173	1	0.000586733	-2.63678	-151.077	-0.875267	-0.483641	-0.0162449	0.00386831	-0.9728	0.231648	2.90782	166.606	-0.972664	0.232219	2.90723	166.572	0.000277991	0.0166731	2.49425e+06	0.0175438	0.0175438	-0.0175395	-0.0175395	0.00444451	0.00444451	0.00446147
		66	0.983795	1.47174e+08	0.967853	1.0003	1.00058	-0.0162256	0.00394771	2.00088	-0.000275496	0.000278854	0.0166989	4.82608e-06	1.0003	1.00057	-0.868675	-2.62332	-150.305	-2.63034	-150.708	0.00702576	0.402547	0.999975	0.00702571	-2.63034	-150.708	-0.872134	-0.489266	-0.0162529	0.00383362	-0.973291	0.229573	2.90995	166.728	-0.971655	0.236405	2.90293	166.326	0.000278337	0.0166834	2.49581e+06	0.0175332	0.0175332	-0.0175289	-0.0175289	0.00447877	0.00447877	0.00449572
		67	0.983813	1.47176e+08	0.967888	1.00031	1.00058	-0.0162085	0.00401747	2.00088	-0.000273729	0.000278857	0.016699	5.28963e-06	1.0003	1.00057	-0.863104	-2.61218	-149.667	-2.62477	-150.389	0.012595	0.721643	0.999921	0.0125947	-2.62477	-150.389	-0.869396	-0.494116	-0.0162579	0.00381301	-0.973582	0.228337	2.91122	166.801	-0.970629	0.240581	2.89863	166.079	0.000278801	0.0166973	2.49788e+06	0.0175271	0.0175271	-0.0175228	-0.0175228	0.00449921	0.00449921	0.00451615
		68	0.983831	1.47179e+08	0.967924	1.00031	1.00058	-0.0161909	0.00408722	2.00088	-0.000273165	0.000278851	0.0166988	5.1613e-06	1.0003	1.00057	-0.861326	-2.60867	-149.466	-2.62302	-150.288	0.0143499	0.822187	0.999897	0.0143494	-2.62302	-150.288	-0.868528	-0.495641	-0.0162479	0.00385447	-0.972996	0.230823	2.90867	166.654	-0.969583	0.244761	2.89432	165.832	0.000278672	0.0166935	2.49731e+06	0.0175394	0.0175394	-0.0175351	-0.0175351	0.00445809	0.00445809	0.00447504
2016-01-18	18	69	0.983849	1.47182e+08	0.967959	1.00031	1.00058	-0.0161733	0.0041568	2.00088	-0.000272259	0.000278854	0.0166989	4.86238e-06	1.0003	1.00057	-0.858468	-2.60307	-149.145	-2.62022	-150.128	0.0171489	0.982558	0.999853	0.017148	-2.62022	-150.128	-0.867137	-0.49807	-0.0162422	0.00387885	-0.972649	0.232282	2.90717	166.569	-0.968522	0.248926	2.89002	165.586	0.000278373	0.0166845	2.49597e+06	0.0175468	0.0175468	-0.0175425	-0.0175425	0.00443398	0.00443398	0.00445094
		70	0.983868	1.47185e+08	0.967997	1.00031	1.00058	-0.016155	0.00422638	2.00088	-0.000270083	0.000278847	0.0166987	5.20812e-06	1.0003	1.00057	-0.851606	-2.58984	-148.387	-2.6136	-149.748	0.0237656	1.36167	0.999718	0.0237634	-2.6136	-149.748	-0.863822	-0.503797	-0.0162509	0.00384129	-0.973182	0.230035	2.90948	166.701	-0.967441	0.253096	2.88571	165.339	0.000278719	0.0166949	2.49752e+06	0.0175353	0.0175353	-0.017531	-0.017531	0.00447107	0.00447107	0.00448802
		71	0.983888	1.47188e+08	0.968035	1.00031	1.00058	-0.0161367	0.00429579	2.00089	-0.000268264	0.000278848	0.0166987	5.73333e-06	1.0003	1.00057	-0.845872	-2.57899	-147.765	-2.60818	-149.438	0.0291878	1.67234	0.999574	0.0291836	-2.60818	-149.438	-0.861078	-0.508473	-0.0162552	0.00382303	-0.97344	0.228941	2.9106	166.765	-0.966344	0.257252	2.88142	165.093	0.000279244	0.0167106	2.49987e+06	0.0175299	0.0175299	-0.0175255	-0.0175255	0.00448917	0.00448917	0.00450611
		72	0.983907	1.4719e+08	0.968073	1.00031	1.00058	-0.0161179	0.00436519	2.00089	-0.000267674	0.00027884	0.0166985	5.654e-06	1.0003	1.00057	-0.844011	-2.57551	-147.566	-2.60644	-149.338	0.0309278	1.77203	0.999522	0.0309229	-2.60644	-149.338	-0.860192	-0.50997	-0.0162451	0.00386469	-0.972849	0.231439	2.90804	166.618	-0.965227	0.261412	2.87711	164.846	0.000279165	0.0167082	2.49952e+06	0.0175422	0.0175422	-0.0175378	-0.0175378	0.0044478	0.0044478	0.00446476
2016-01-19	19	73	0.983926	1.47193e+08	0.968111	1.00031	1.00058	-0.016099	0.00443438	2.00088	-0.000266665	0.000278841	0.0166985	5.36635e-06	1.0003	1.00057	-0.840831	-2.56961	-147.228	-2.60349	-149.169	0.0338783	1.94109	0.999426	0.0338719	-2.60349	-149.169	-0.858683	-0.512506	-0.0162399	0.00388654	-0.972537	0.232747	2.90669	166.541	-0.964096	0.265555	2.87281	164.6	0.000278877	0.0166996	2.49823e+06	0.0175487	0.0175487	-0.0175444	-0.0175444	0.00442617	0.00442617	0.00444313
		74	0.983947	1.47196e+08	0.968151	1.00031	1.00057	-0.0160795	0.00450357	2.00089	-0.000264485	0.000278833	0.0166983	5.6742e-06	1.0003	1.00057	-0.833957	-2.55704	-146.507	-2.5972	-148.809	0.0401672	2.30141	0.999193	0.0401564	-2.5972	-148.809	-0.855443	-0.517896	-0.0162474	0.00385424	-0.972997	0.230817	2.90868	166.655	-0.962944	0.269703	2.86851	164.353	0.000279185	0.0167088	2.49961e+06	0.0175388	0.0175388	-0.0175345	-0.0175345	0.00445804	0.00445804	0.00447499
		75	0.983967	1.47199e+08	0.968192	1.00031	1.00057	-0.01606	0.00457265	2.00089	-0.000262538	0.000278834	0.0166983	6.09924e-06	1.00031	1.00057	-0.827816	-2.546	-145.875	-2.59168	-148.493	0.0456851	2.61756	0.998957	0.0456692	-2.59168	-148.493	-0.852573	-0.522609	-0.0162521	0.00383443	-0.973278	0.22963	2.9099	166.725	-0.961776	0.273839	2.86421	164.107	0.00027961	0.0167216	2.50151e+06	0.0175329	0.0175329	-0.0175286	-0.0175286	0.00447767	0.00447767	0.00449461
		76	0.983988	1.47202e+08	0.968232	1.00031	1.00057	-0.01604	0.00464173	2.00089	-0.000261767	0.000278826	0.0166981	5.94519e-06	1.00031	1.00057	-0.825388	-2.54168	-145.628	-2.58953	-148.369	0.0478426	2.74118	0.998856	0.0478244	-2.58953	-148.369	-0.851443	-0.524447	-0.0162436	0.00386932	-0.972782	0.231722	2.90775	166.602	-0.960587	0.27798	2.8599	163.86	0.000279456	0.0167169	2.50082e+06	0.0175431	0.0175431	-0.0175388	-0.0175388	0.00444302	0.00444302	0.00445997
2016-01-20	20	77	0.984008	1.47206e+08	0.968272	1.00031	1.00057	-0.0160199	0.00471067	2.00089	-0.00026073	0.000278828	0.0166982	5.65813e-06	1.00031	1.00057	-0.822115	-2.53591	-145.297	-2.58664	-148.204	0.0507285	2.90653	0.998714	0.0507068	-2.58664	-148.204	-0.849926	-0.526902	-0.0162382	0.00389229	-0.972453	0.233097	2.90633	166.521	-0.959383	0.282107	2.8556	163.614	0.000279169	0.0167084	2.49953e+06	0.01755	0.01755	-0.0175457	-0.0175457	0.00442027	0.00442027	0.00443723
		78	0.98403	1.47209e+08	0.968315	1.00031	1.00057	-0.0159992	0.00477961	2.00089	-0.000258471	0.000278821	0.0166979	5.99124e-06	1.00031	1.00057	-0.814992	-2.52351	-144.587	-2.58044	-147.848	0.0569292	3.2618	0.99838	0.0568985	-2.58044	-147.848	-0.846643	-0.532162	-0.0162453	0.00386154	-0.972892	0.231258	2.90822	166.629	-0.958158	0.28624	2.85129	163.367	0.000279502	0.0167183	2.50103e+06	0.0175406	0.0175406	-0.0175363	-0.0175363	0.00445064	0.00445064	0.00446759
		79	0.984052	1.47212e+08	0.968358	1.00032	1.00057	-0.0159786	0.00484837	2.00089	-0.000256593	0.000278822	0.016698	6.51618e-06	1.00031	1.00057	-0.809073	-2.51337	-144.005	-2.57537	-147.558	0.0620004	3.55236	0.998079	0.0619607	-2.57537	-147.558	-0.843933	-0.536448	-0.0162483	0.00384901	-0.973071	0.230508	2.90899	166.673	-0.956918	0.290357	2.84699	163.121	0.000280027	0.016734	2.50337e+06	0.0175369	0.0175369	-0.0175326	-0.0175326	0.00446306	0.00446306	0.00448001
		80	0.984074	1.47215e+08	0.968401	1.00032	1.00057	-0.0159573	0.00491712	2.00089	-0.000255893	0.000278814	0.0166977	6.46207e-06	1.00031	1.00056	-0.806865	-2.50962	-143.791	-2.5735	-147.45	0.063874	3.65971	0.997961	0.0638306	-2.5735	-147.45	-0.842927	-0.538029	-0.0162386	0.00388853	-0.972506	0.232878	2.90656	166.533	-0.955658	0.294478	2.84268	162.874	0.000279973	0.0167324	2.50313e+06	0.0175485	0.0175485	-0.0175442	-0.0175442	0.0044238	0.0044238	0.00444076
2016-01-21	21	81	0.984095	1.47219e+08	0.968444	1.00032	1.00057	-0.0159361	0.00498565	2.00089	-0.000254749	0.000278815	0.0166978	6.18696e-06	1.00031	1.00056	-0.803258	-2.50354	-143.442	-2.57046	-147.276	0.0669147	3.83393	0.997762	0.0668648	-2.57046	-147.276	-0.841287	-0.540589	-0.0162338	0.00390893	-0.972213	0.234099	2.9053	166.461	-0.954384	0.298582	2.83839	162.628	0.000279698	0.0167242	2.5019e+06	0.0175546	0.0175546	-0.0175503	-0.0175503	0.00440358	0.00440358	0.00442054
		82	0.984118	1.47222e+08	0.968489	1.00032	1.00057	-0.0159142	0.00505417	2.00089	-0.000252482	0.000278808	0.0166975	6.48287e-06	1.00031	1.00056	-0.796108	-2.49163	-142.76	-2.5645	-146.935	0.0728683	4.17505	0.997346	0.0728039	-2.5645	-146.935	-0.838053	-0.545588	-0.01624	0.00388214	-0.972597	0.232498	2.90695	166.556	-0.953089	0.30269	2.83408	162.381	0.000279994	0.016733	2.50322e+06	0.0175464	0.0175464	-0.0175421	-0.0175421	0.00443003	0.00443003	0.00444699
		83	0.984141	1.47225e+08	0.968534	1.00032	1.00057	-0.0158924	0.00512258	2.00089	-0.000250472	0.00027881	0.0166976	6.90834e-06	1.00031	1.00056	-0.78977	-2.48123	-142.164	-2.5593	-146.637	0.0780696	4.47306	0.996954	0.0779903	-2.5593	-146.637	-0.835204	-0.54994	-0.0162435	0.00386752	-0.972806	0.231621	2.90785	166.607	-0.951779	0.306785	2.82978	162.134	0.000280419	0.0167457	2.50513e+06	0.0175421	0.0175421	-0.0175378	-0.0175378	0.00444455	0.00444455	0.00446151
		84	0.984164	1.47229e+08	0.968579	1.00032	1.00057	-0.01587	0.00519098	2.00089	-0.000249613	0.000278804	0.0166974	6.76752e-06	1.00031	1.00056	-0.787062	-2.47683	-141.912	-2.5571	-146.511	0.0802706	4.59917	0.99678	0.0801845	-2.5571	-146.511	-0.833992	-0.551777	-0.0162352	0.00390174	-0.972315	0.233673	2.90574	166.487	-0.950448	0.310885	2.82547	161.887	0.000280279	0.0167415	2.5045e+06	0.0175521	0.0175521	-0.0175478	-0.0175478	0.00441055	0.00441055	0.00442751
2016-01-22	22	85	0.984187	1.47232e+08	0.968624	1.00032	1.00057	-0.0158476	0.00525917	2.00089	-0.000248335	0.000278807	0.0166975	6.4182e-06	1.00031	1.00056	-0.783033	-2.47032	-141.539	-2.55385	-146.325	0.0835229	4.78551	0.996514	0.0834258	-2.55385	-146.325	-0.832193	-0.554486	-0.0162311	0.00391873	-0.97207	0.23469	2.90469	166.427	-0.949102	0.314967	2.82117	161.641	0.000279929	0.0167311	2.50293e+06	0.0175572	0.0175572	-0.0175529	-0.0175529	0.00439372	0.00439372	0.00441069
		86	0.984211	1.47236e+08	0.968671	1.00032	1.00057	-0.0158246	0.00532736	2.00089	-0.000245835	0.0002788	0.0166973	6.68917e-06	1.00031	1.00056	-0.775151	-2.45775	-140.819	-2.54756	-145.964	0.0898096	5.14571	0.99597	0.0896889	-2.54756	-145.964	-0.828691	-0.559707	-0.0162387	0.00388659	-0.972532	0.232768	2.90667	166.54	-0.947736	0.319055	2.81686	161.394	0.0002802	0.0167392	2.50415e+06	0.0175475	0.0175475	-0.0175432	-0.0175432	0.0044255	0.0044255	0.00444246
		87	0.984235	1.47239e+08	0.968719	1.00032	1.00057	-0.0158016	0.00539536	2.00089	-0.000243717	0.000278801	0.0166973	7.15185e-06	1.00032	1.00056	-0.768472	-2.44725	-140.217	-2.54231	-145.663	0.0950623	5.44667	0.995485	0.0949192	-2.54231	-145.663	-0.825739	-0.564052	-0.0162424	0.00387112	-0.972754	0.231841	2.90762	166.595	-0.946356	0.323127	2.81256	161.148	0.000280663	0.016753	2.50621e+06	0.0175429	0.0175429	-0.0175386	-0.0175386	0.00444085	0.00444085	0.00445781
		88	0.984259	1.47243e+08	0.968766	1.00032	1.00057	-0.015778	0.00546336	2.00089	-0.000242749	0.000278795	0.0166972	7.0483e-06	1.00032	1.00056	-0.765421	-2.44249	-139.944	-2.53993	-145.527	0.0974392	5.58286	0.995257	0.0972851	-2.53993	-145.527	-0.824396	-0.566013	-0.0162347	0.00390248	-0.972304	0.233721	2.90569	166.484	-0.944954	0.327203	2.80825	160.901	0.000280559	0.0167499	2.50575e+06	0.0175521	0.0175521	-0.0175478	-0.0175478	0.00440968	0.00440968	0.00442664
2016-01-23	23	89	0.984283	1.47247e+08	0.968814	1.00032	1.00056	-0.0157545	0.00553115	2.00089	-0.000241363	0.000278797	0.0166972	6.73619e-06	1.00032	1.00056	-0.761048	-2.43572	-139.557	-2.53655	-145.333	0.100823	5.77674	0.994922	0.100652	-2.53655	-145.333	-0.822476	-0.5688	-0.0162312	0.00391734	-0.97209	0.23461	2.90478	166.431	-0.943539	0.331262	2.80395	160.655	0.000280247	0.0167406	2.50436e+06	0.0175565	0.0175565	-0.0175522	-0.0175522	0.00439496	0.00439496	0.00441193
		90	0.984309	1.47251e+08	0.968864	1.00032	1.00056	-0.0157303	0.00559894	2.00089	-0.000238778	0.00027879	0.016697	7.03212e-06	1.00032	1.00056	-0.752899	-2.42325	-138.842	-2.53031	-144.976	0.107059	6.13403	0.994275	0.106855	-2.53031	-144.976	-0.818913	-0.573918	-0.0162385	0.00388603	-0.972539	0.232738	2.9067	166.542	-0.942102	0.335326	2.79964	160.408	0.000280543	0.0167494	2.50568e+06	0.017547	0.017547	-0.0175427	-0.0175427	0.00442591	0.00442591	0.00444287
		91	0.984334	1.47254e+08	0.968914	1.00033	1.00056	-0.0157061	0.00566653	2.00089	-0.000236599	0.000278791	0.016697	7.53215e-06	1.00032	1.00056	-0.746029	-2.41288	-138.248	-2.52512	-144.679	0.112247	6.4313	0.993707	0.112012	-2.52512	-144.679	-0.815924	-0.578159	-0.016242	0.0038716	-0.972746	0.231873	2.90759	166.593	-0.940652	0.339373	2.79534	160.161	0.000281043	0.0167643	2.50791e+06	0.0175428	0.0175428	-0.0175385	-0.0175385	0.00444023	0.00444023	0.00445718
		92	0.98436	1.47258e+08	0.968964	1.00033	1.00056	-0.0156813	0.00573412	2.00089	-0.000235622	0.000278784	0.0166968	7.4406e-06	1.00032	1.00055	-0.742948	-2.40826	-137.983	-2.52282	-144.547	0.114555	6.56351	0.993446	0.114305	-2.52282	-144.547	-0.814588	-0.58004	-0.016234	0.00390409	-0.972279	0.233822	2.90559	166.478	-0.93918	0.343426	2.79103	159.914	0.000280952	0.0167616	2.5075e+06	0.0175522	0.0175522	-0.0175479	-0.0175479	0.00440792	0.00440792	0.00442488
2016-01-24	24	93	0.984385	1.47262e+08	0.969014	1.00033	1.00056	-0.0156565	0.00580147	2.00089	-0.000234175	0.000278784	0.0166968	7.11529e-06	1.00032	1.00055	-0.738385	-2.40147	-137.594	-2.51942	-144.352	0.117951	6.75809	0.993052	0.117678	-2.51942	-144.352	-0.812614	-0.582803	-0.0162305	0.00391873	-0.972068	0.234699	2.90468	166.426	-0.937695	0.347459	2.78673	159.668	0.000280626	0.0167519	2.50605e+06	0.0175566	0.0175566	-0.0175523	-0.0175523	0.00439339	0.00439339	0.00441036
		94	0.984412	1.47266e+08	0.969066	1.00033	1.00056	-0.0156312	0.00586882	2.00089	-0.000231603	0.000278777	0.0166966	7.36117e-06	1.00032	1.00055	-0.730277	-2.38952	-136.91	-2.51345	-144.01	0.123923	7.10029	0.992331	0.123607	-2.51345	-144.01	-0.809118	-0.587646	-0.0162367	0.00389169	-0.972457	0.233083	2.90635	166.521	-0.936189	0.351497	2.78242	159.421	0.000280872	0.0167592	2.50715e+06	0.0175483	0.0175483	-0.0175441	-0.0175441	0.00442011	0.00442011	0.00443707
		95	0.984438	1.4727e+08	0.969118	1.00033	1.00056	-0.0156058	0.00593598	2.00089	-0.000229413	0.000278778	0.0166967	7.79866e-06	1.00032	1.00055	-0.723369	-2.37947	-136.333	-2.50842	-143.722	0.128952	7.38843	0.991697	0.128595	-2.50842	-143.722	-0.806153	-0.591707	-0.0162396	0.00387986	-0.972627	0.232373	2.90708	166.563	-0.934669	0.355519	2.77812	159.175	0.00028131	0.0167723	2.5091e+06	0.0175449	0.0175449	-0.0175406	-0.0175406	0.00443186	0.00443186	0.00444882
		96	0.984465	1.47274e+08	0.96917	1.00033	1.00056	-0.0155799	0.00600314	2.00089	-0.000228347	0.000278772	0.0166965	7.68272e-06	1.00032	1.00055	-0.720008	-2.37461	-136.055	-2.50599	-143.583	0.13138	7.52752	0.991382	0.131002	-2.50599	-143.583	-0.804714	-0.593663	-0.0162321	0.0039104	-0.972187	0.234205	2.90519	166.455	-0.933128	0.359545	2.77381	158.928	0.000281194	0.0167688	2.50858e+06	0.0175537	0.0175537	-0.0175495	-0.0175495	0.00440148	0.00440148	0.00441845
2016-01-25	25	97	0.984491	1.47278e+08	0.969223	1.00033	1.00056	-0.015554	0.00607005	2.00089	-0.000226785	0.000278774	0.0166965	7.32037e-06	1.00032	1.00055	-0.715085	-2.36754	-135.65	-2.50246	-143.38	0.134914	7.73001	0.990913	0.134505	-2.50246	-143.38	-0.802611	-0.596503	-0.0162292	0.0039228	-0.972008	0.234947	2.90443	166.412	-0.931574	0.363552	2.76951	158.681	0.000280831	0.016758	2.50696e+06	0.0175574	0.0175574	-0.0175532	-0.0175532	0.0043892	0.0043892	0.00440617
		98	0.984519	1.47282e+08	0.969277	1.00033	1.00056	-0.0155276	0.00613697	2.00089	-0.0002241	0.000278768	0.0166963	7.52927e-06	1.00032	1.00055	-0.706616	-2.3555	-134.96	-2.49644	-143.035	0.140935	8.07497	0.990085	0.140469	-2.49644	-143.035	-0.799005	-0.601324	-0.0162357	0.00389498	-0.972409	0.233283	2.90614	166.51	-0.929998	0.367564	2.7652	158.435	0.00028104	0.0167643	2.5079e+06	0.017549	0.017549	-0.0175448	-0.0175448	0.00441671	0.00441671	0.00443367
		99	0.984546	1.47286e+08	0.969332	1.00033	1.00056	-0.0155011	0.00620368	2.00089	-0.000221819	0.00027877	0.0166964	7.94216e-06	1.00033	1.00055	-0.699424	-2.34539	-134.381	-2.49138	-142.745	0.145991	8.36467	0.989362	0.145473	-2.49138	-142.745	-0.795954	-0.605357	-0.0162387	0.00388269	-0.972585	0.232547	2.9069	166.553	-0.92841	0.371558	2.76091	158.188	0.000281453	0.0167766	2.50974e+06	0.0175454	0.0175454	-0.0175412	-0.0175412	0.00442892	0.00442892	0.00444588
		100	0.984574	1.4729e+08	0.969386	1.00033	1.00056	-0.015474	0.00627039	2.00089	-0.000220739	0.000278764	0.0166962	7.76359e-06	1.00033	1.00055	-0.696019	-2.34063	-134.108	-2.489	-142.609	0.148368	8.50086	0.989014	0.147824	-2.489	-142.609	-0.794513	-0.607247	-0.0162309	0.00391406	-0.972133	0.234428	2.90496	166.442	-0.926799	0.375558	2.75659	157.941	0.000281275	0.0167712	2.50894e+06	0.0175546	0.0175546	-0.0175503	-0.0175503	0.00439772	0.00439772	0.00441468
2016-01-26	26	101	0.984602	1.47294e+08	0.969441	1.00033	1.00055	-0.015447	0.00633686	2.00089	-0.000219188	0.000278765	0.0166962	7.35113e-06	1.00033	1.00055	-0.691129	-2.33385	-133.72	-2.48561	-142.415	0.151762	8.69531	0.988506	0.15118	-2.48561	-142.415	-0.792448	-0.60994	-0.0162274	0.00392876	-0.971921	0.235308	2.90406	166.39	-0.925176	0.379538	2.7523	157.695	0.000280862	0.0167589	2.5071e+06	0.0175589	0.0175589	-0.0175547	-0.0175547	0.00438315	0.00438315	0.00440012
		102	0.984631	1.47299e+08	0.969498	1.00034	1.00055	-0.0154193	0.00640334	2.00089	-0.000216488	0.000278758	0.0166961	7.52229e-06	1.00033	1.00055	-0.682615	-2.32213	-133.048	-2.47975	-142.079	0.15762	9.03094	0.987604	0.156968	-2.47975	-142.079	-0.788861	-0.614571	-0.0162333	0.00390362	-0.972283	0.233805	2.9056	166.479	-0.923531	0.383524	2.74798	157.448	0.000281033	0.016764	2.50787e+06	0.0175513	0.0175513	-0.017547	-0.017547	0.004408	0.004408	0.00442496
		103	0.98466	1.47303e+08	0.969554	1.00034	1.00055	-0.0153917	0.00646957	2.00089	-0.000214267	0.000278759	0.0166961	7.93467e-06	1.00033	1.00054	-0.675612	-2.31259	-132.502	-2.47498	-141.806	0.16239	9.30426	0.986844	0.161677	-2.47498	-141.806	-0.785921	-0.618327	-0.0162352	0.00389598	-0.972394	0.233347	2.90607	166.506	-0.921874	0.387491	2.74368	157.202	0.000281446	0.0167763	2.50971e+06	0.0175491	0.0175491	-0.0175448	-0.0175448	0.00441559	0.00441559	0.00443255
		104	0.984688	1.47307e+08	0.969611	1.00034	1.00055	-0.0153635	0.00653581	2.00089	-0.000213195	0.000278753	0.0166959	7.78102e-06	1.00033	1.00054	-0.672233	-2.30802	-132.24	-2.47269	-141.675	0.164676	9.43525	0.986471	0.163933	-2.47269	-141.675	-0.784505	-0.620123	-0.016227	0.00392882	-0.971919	0.235316	2.90405	166.39	-0.920194	0.391462	2.73937	156.954	0.000281292	0.0167718	2.50902e+06	0.0175586	0.0175586	-0.0175543	-0.0175543	0.00438292	0.00438292	0.00439989
2016-01-27	27	105	0.984717	1.47312e+08	0.969668	1.00034	1.00055	-0.0153352	0.00660178	2.00089	-0.000211603	0.000278753	0.0166959	7.36826e-06	1.00033	1.00054	-0.667211	-2.30125	-131.852	-2.46931	-141.481	0.168058	9.629	0.985912	0.167268	-2.46931	-141.481	-0.782404	-0.622772	-0.0162235	0.00394368	-0.971703	0.236207	2.90313	166.337	-0.918503	0.395413	2.73507	156.708	0.000280879	0.0167595	2.50718e+06	0.017563	0.017563	-0.0175588	-0.0175588	0.00436816	0.00436816	0.00438514
		106	0.984747	1.47316e+08	0.969727	1.00034	1.00055	-0.0153064	0.00666776	2.00089	-0.00020886	0.000278746	0.0166957	7.53919e-06	1.00033	1.00054	-0.658563	-2.2897	-131.19	-2.46354	-141.15	0.173833	9.95991	0.984929	0.172959	-2.46354	-141.15	-0.778794	-0.62728	-0.016229	0.00391988	-0.972048	0.234784	2.9046	166.421	-0.91679	0.39937	2.73076	156.461	0.00028105	0.0167646	2.50794e+06	0.0175558	0.0175558	-0.0175515	-0.0175515	0.00439169	0.00439169	0.00440866
		107	0.984777	1.47321e+08	0.969786	1.00034	1.00055	-0.0152777	0.0067335	2.00089	-0.000206571	0.000278747	0.0166957	7.93884e-06	1.00033	1.00054	-0.651346	-2.28015	-130.643	-2.45876	-140.877	0.178608	10.2335	0.984092	0.17766	-2.45876	-140.877	-0.77579	-0.630992	-0.0162309	0.00391216	-0.972159	0.234321	2.90507	166.448	-0.915065	0.403307	2.72646	156.215	0.00028145	0.0167765	2.50972e+06	0.0175535	0.0175535	-0.0175492	-0.0175492	0.00439936	0.00439936	0.00441632
		108	0.984807	1.47325e+08	0.969845	1.00034	1.00055	-0.0152483	0.00679925	2.00089	-0.00020533	0.000278742	0.0166956	7.82331e-06	1.00033	1.00054	-0.647433	-2.27501	-130.348	-2.45619	-140.729	0.181181	10.3809	0.983632	0.180191	-2.45619	-140.729	-0.774164	-0.632985	-0.0162239	0.00394034	-0.97175	0.236012	2.90333	166.349	-0.913317	0.407249	2.72215	155.968	0.000281334	0.016773	2.50921e+06	0.0175617	0.0175617	-0.0175574	-0.0175574	0.00437131	0.00437131	0.00438828
2016-01-28	28	109	0.984837	1.4733e+08	0.969905	1.00034	1.00055	-0.015219	0.00686472	2.00089	-0.000203542	0.000278743	0.0166956	7.436e-06	1.00034	1.00054	-0.641796	-2.26763	-129.926	-2.4525	-140.518	0.184868	10.5922	0.982961	0.183817	-2.4525	-140.518	-0.771825	-0.635836	-0.0162215	0.00395024	-0.971606	0.236604	2.90272	166.314	-0.911559	0.41117	2.71786	155.722	0.000280947	0.0167615	2.50748e+06	0.0175646	0.0175646	-0.0175604	-0.0175604	0.0043615	0.0043615	0.00437847
		110	0.984868	1.47334e+08	0.969966	1.00034	1.00054	-0.0151891	0.0069302	2.00089	-0.000200629	0.000278737	0.0166954	7.62014e-06	1.00034	1.00054	-0.632608	-2.25571	-129.243	-2.44654	-140.177	0.190829	10.9337	0.981847	0.189672	-2.44654	-140.177	-0.768021	-0.640425	-0.0162279	0.00392343	-0.971995	0.235	2.90437	166.408	-0.909778	0.415095	2.71355	155.475	0.000281131	0.016767	2.5083e+06	0.0175566	0.0175566	-0.0175523	-0.0175523	0.00438803	0.00438803	0.004405
		111	0.9849	1.47339e+08	0.970027	1.00035	1.00054	-0.0151593	0.00699543	2.00089	-0.000198193	0.000278739	0.0166955	8.04535e-06	1.00034	1.00054	-0.62493	-2.24584	-128.677	-2.4416	-139.894	0.195766	11.2166	0.980899	0.194518	-2.4416	-139.894	-0.76485	-0.644209	-0.0162304	0.00391307	-0.972145	0.234379	2.90501	166.445	-0.907986	0.419001	2.70925	155.228	0.000281556	0.0167796	2.5102e+06	0.0175535	0.0175535	-0.0175493	-0.0175493	0.00439834	0.00439834	0.00441531
		112	0.984931	1.47344e+08	0.970089	1.00035	1.00054	-0.0151288	0.00706067	2.00089	-0.000196983	0.000278732	0.0166953	7.86661e-06	1.00034	1.00054	-0.621114	-2.24096	-128.398	-2.43916	-139.754	0.198205	11.3563	0.980422	0.19691	-2.43916	-139.754	-0.763276	-0.646073	-0.0162229	0.00394343	-0.971704	0.2362	2.90314	166.338	-0.90617	0.422914	2.70493	154.981	0.000281378	0.0167743	2.5094e+06	0.0175623	0.0175623	-0.0175581	-0.0175581	0.00436811	0.00436811	0.00438508
2016-01-29	29	113	0.984962	1.47348e+08	0.97015	1.00035	1.00054	-0.0150983	0.00712564	2.00089	-0.000195251	0.000278733	0.0166953	7.42861e-06	1.00034	1.00053	-0.615652	-2.23401	-127.999	-2.43569	-139.555	0.20168	11.5554	0.979731	0.200316	-2.43569	-139.555	-0.761026	-0.648721	-0.0162196	0.00395678	-0.97151	0.237	2.90232	166.29	-0.904344	0.426805	2.70064	154.735	0.00028094	0.0167613	2.50745e+06	0.0175662	0.0175662	-0.017562	-0.017562	0.00435484	0.00435484	0.00437182
		114	0.984994	1.47353e+08	0.970214	1.00035	1.00054	-0.0150672	0.00719061	2.00089	-0.000192417	0.000278726	0.0166951	7.54983e-06	1.00034	1.00053	-0.606716	-2.22272	-127.352	-2.43004	-139.231	0.207325	11.8789	0.978585	0.205843	-2.43004	-139.231	-0.757352	-0.653007	-0.0162247	0.00393513	-0.971824	0.235706	2.90365	166.367	-0.902494	0.430702	2.69632	154.488	0.000281061	0.0167649	2.50799e+06	0.0175597	0.0175597	-0.0175554	-0.0175554	0.00437625	0.00437625	0.00439322
		115	0.985027	1.47358e+08	0.970277	1.00035	1.00054	-0.0150362	0.00725532	2.00089	-0.000190111	0.000278726	0.0166951	7.9369e-06	1.00034	1.00053	-0.599444	-2.2136	-126.83	-2.42549	-138.97	0.211883	12.14	0.977637	0.210302	-2.42549	-138.97	-0.754368	-0.656452	-0.0162257	0.00393093	-0.971885	0.235454	2.90391	166.382	-0.900634	0.434578	2.69202	154.242	0.000281448	0.0167764	2.50972e+06	0.0175584	0.0175584	-0.0175542	-0.0175542	0.00438042	0.00438042	0.00439739
		116	0.985059	1.47363e+08	0.970341	1.00035	1.00054	-0.0150046	0.00732003	2.00089	-0.000188826	0.000278722	0.016695	7.82158e-06	1.00034	1.00053	-0.595394	-2.20855	-126.541	-2.42296	-138.825	0.214409	12.2847	0.977102	0.21277	-2.42296	-138.825	-0.752707	-0.658355	-0.0162185	0.00395988	-0.971463	0.23719	2.90212	166.279	-0.898752	0.438457	2.68771	153.995	0.000281333	0.016773	2.5092e+06	0.0175668	0.0175668	-0.0175626	-0.0175626	0.0043516	0.0043516	0.00436858
2016-01-30	30	117	0.985091	1.47368e+08	0.970405	1.00035	1.00054	-0.0149731	0.00738446	2.00089	-0.000186994	0.000278723	0.016695	7.43435e-06	1.00034	1.00053	-0.589616	-2.20138	-126.13	-2.41937	-138.62	0.217995	12.4902	0.976333	0.216273	-2.41937	-138.62	-0.750342	-0.66105	-0.0162158	0.00397143	-0.971294	0.237881	2.90141	166.238	-0.89686	0.442315	2.68341	153.748	0.000280945	0.0167614	2.50747e+06	0.0175702	0.0175702	-0.017566	-0.017566	0.00434015	0.00434015	0.00435713
		118	0.985125	1.47373e+08	0.970471	1.00035	1.00054	-0.014941	0.00744889	2.00089	-0.000184035	0.000278718	0.0166949	7.61872e-06	1.00034	1.00053	-0.580286	-2.18988	-125.471	-2.41362	-138.29	0.223747	12.8198	0.975073	0.221885	-2.41362	-138.29	-0.746527	-0.665355	-0.0162213	0.00394804	-0.971636	0.236483	2.90285	166.321	-0.894944	0.446179	2.6791	153.501	0.00028113	0.0167669	2.5083e+06	0.0175632	0.0175632	-0.017559	-0.017559	0.00436331	0.00436331	0.00438028
		119	0.985158	1.47378e+08	0.970536	1.00035	1.00054	-0.0149088	0.00751309	2.00089	-0.000181554	0.00027872	0.0166949	8.04405e-06	1.00035	1.00053	-0.572462	-2.1803	-124.922	-2.40884	-138.016	0.228534	13.094	0.974	0.22655	-2.40884	-138.016	-0.743333	-0.668921	-0.0162233	0.00394015	-0.971751	0.236009	2.90334	166.349	-0.893017	0.450023	2.6748	153.255	0.000281555	0.0167796	2.51019e+06	0.017561	0.017561	-0.0175567	-0.0175567	0.00437117	0.00437117	0.00438815
		120	0.985192	1.47383e+08	0.970602	1.00035	1.00053	-0.0148762	0.00757728	2.00089	-0.000180195	0.000278715	0.0166948	7.91631e-06	1.00035	1.00053	-0.568178	-2.17509	-124.623	-2.40623	-137.867	0.231142	13.2434	0.973406	0.229089	-2.40623	-137.867	-0.741586	-0.670857	-0.0162164	0.00396781	-0.971346	0.237668	2.90163	166.251	-0.891067	0.453872	2.67049	153.008	0.000281427	0.0167758	2.50962e+06	0.0175689	0.0175689	-0.0175647	-0.0175647	0.00434363	0.00434363	0.00436061
2016-01-31	31	121	0.985225	1.47388e+08	0.970668	1.00036	1.00053	-0.0148435	0.00764116	2.00089	-0.000178212	0.000278716	0.0166948	7.4788e-06	1.00035	1.00053	-0.561928	-2.16751	-124.189	-2.40244	-137.65	0.23493	13.4605	0.972531	0.232775	-2.40244	-137.65	-0.73904	-0.673662	-0.0162144	0.00397608	-0.971225	0.238163	2.90112	166.222	-0.889108	0.457697	2.66619	152.761	0.00028099	0.0167628	2.50767e+06	0.0175714	0.0175714	-0.0175672	-0.0175672	0.00433542	0.00433542	0.0043524
		122	0.98526	1.47393e+08	0.970736	1.00036	1.00053	-0.0148103	0.00770505	2.00089	-0.000175152	0.000278711	0.0166947	7.58834e-06	1.00035	1.00052	-0.552278	-2.15589	-123.523	-2.39663	-137.317	0.240739	13.7934	0.971162	0.238421	-2.39663	-137.317	-0.735114	-0.677944	-0.0162202	0.00395177	-0.971581	0.236709	2.90262	166.308	-0.887126	0.461528	2.66188	152.514	0.000281099	0.016766	2.50816e+06	0.0175641	0.0175641	-0.0175599	-0.0175599	0.00435951	0.00435951	0.00437648
		123	0.985294	1.47398e+08	0.970804	1.00036	1.00053	-0.014777	0.00776863	2.00089	-0.000172694	0.000278712	0.0166947	8.0008e-06	1.00035	1.00052	-0.544526	-2.14662	-122.992	-2.39199	-137.051	0.245375	14.059	0.970046	0.24292	-2.39199	-137.051	-0.731963	-0.681344	-0.0162216	0.00394629	-0.971661	0.23638	2.90295	166.327	-0.885134	0.465336	2.65758	152.268	0.000281512	0.0167783	2.51e+06	0.0175625	0.0175625	-0.0175583	-0.0175583	0.00436497	0.00436497	0.00438194
		124	0.985329	1.47403e+08	0.970873	1.00036	1.00053	-0.0147432	0.00783221	2.00089	-0.000171382	0.000278707	0.0166945	7.84758e-06	1.00035	1.00052	-0.540391	-2.1417	-122.71	-2.38953	-136.91	0.247836	14.1999	0.969446	0.245307	-2.38953	-136.91	-0.730284	-0.683144	-0.0162141	0.00397629	-0.971221	0.238179	2.9011	166.221	-0.883119	0.469149	2.65327	152.021	0.000281359	0.0167737	2.50932e+06	0.0175712	0.0175712	-0.017567	-0.017567	0.00433507	0.00433507	0.00435206
2016-02-01	32	125	0.985363	1.47408e+08	0.970941	1.00036	1.00053	-0.0147095	0.00789548	2.00089	-0.000169447	0.000278707	0.0166945	7.3845e-06	1.00035	1.00052	-0.534288	-2.13446	-122.296	-2.38592	-136.703	0.251454	14.4073	0.968552	0.248813	-2.38592	-136.703	-0.727808	-0.685781	-0.0162114	0.00398728	-0.971059	0.238838	2.90042	166.182	-0.881095	0.472939	2.64897	151.775	0.000280896	0.0167599	2.50725e+06	0.0175743	0.0175743	-0.0175702	-0.0175702	0.00432414	0.00432414	0.00434113
		126	0.985399	1.47414e+08	0.971011	1.00036	1.00053	-0.0146751	0.00795875	2.00089	-0.000166433	0.000278701	0.0166943	7.46854e-06	1.00035	1.00052	-0.524786	-2.12326	-121.654	-2.38031	-136.382	0.257055	14.7282	0.967143	0.254234	-2.38031	-136.382	-0.723955	-0.689847	-0.0162163	0.00396634	-0.971367	0.237586	2.90171	166.256	-0.879048	0.476733	2.64466	151.528	0.00028098	0.0167624	2.50763e+06	0.0175681	0.0175681	-0.0175639	-0.0175639	0.00434488	0.00434488	0.00436186
		127	0.985434	1.47419e+08	0.971081	1.00036	1.00053	-0.0146408	0.00802172	2.00089	-0.00016402	0.000278701	0.0166943	7.85543e-06	1.00035	1.00052	-0.517178	-2.11435	-121.143	-2.37586	-136.127	0.261512	14.9835	0.966	0.258541	-2.37586	-136.127	-0.720874	-0.693067	-0.0162169	0.00396373	-0.971405	0.23743	2.90187	166.265	-0.876992	0.480506	2.64036	151.282	0.000281366	0.016774	2.50935e+06	0.0175673	0.0175673	-0.0175631	-0.0175631	0.00434746	0.00434746	0.00436444
		128	0.98547	1.47424e+08	0.971151	1.00036	1.00053	-0.014606	0.00808469	2.00089	-0.000162577	0.000278697	0.0166942	7.76549e-06	1.00036	1.00052	-0.512627	-2.10904	-120.839	-2.3732	-135.975	0.264166	15.1356	0.965311	0.261104	-2.3732	-135.975	-0.719031	-0.694978	-0.0162102	0.00399055	-0.97101	0.239038	2.90022	166.17	-0.874913	0.484281	2.63605	151.035	0.000281277	0.0167713	2.50895e+06	0.017575	0.017575	-0.0175708	-0.0175708	0.00432074	0.00432074	0.00433772
2016-02-02	33	129	0.985506	1.4743e+08	0.971222	1.00036	1.00052	-0.0145712	0.00814732	2.00089	-0.000160459	0.000278697	0.0166942	7.34041e-06	1.00036	1.00052	-0.505948	-2.10128	-120.394	-2.36932	-135.752	0.268047	15.3579	0.96429	0.264848	-2.36932	-135.752	-0.716329	-0.697763	-0.0162086	0.00399723	-0.970912	0.239438	2.89981	166.147	-0.872826	0.488032	2.63176	150.789	0.000280851	0.0167586	2.50705e+06	0.017577	0.017577	-0.0175728	-0.0175728	0.00431411	0.00431411	0.0043311
		130	0.985543	1.47435e+08	0.971294	1.00037	1.00052	-0.0145358	0.00820994	2.00089	-0.000157286	0.000278693	0.0166941	7.45019e-06	1.00036	1.00052	-0.495945	-2.08972	-119.732	-2.36354	-135.421	0.273826	15.6891	0.962743	0.270417	-2.36354	-135.421	-0.712285	-0.701891	-0.0162144	0.00397335	-0.971263	0.238009	2.90128	166.231	-0.870715	0.491787	2.62745	150.542	0.000280961	0.0167619	2.50754e+06	0.0175699	0.0175699	-0.0175657	-0.0175657	0.00433779	0.00433779	0.00435477
		131	0.985579	1.47441e+08	0.971366	1.00037	1.00052	-0.0145005	0.00827231	2.00089	-0.00015464	0.000278695	0.0166941	7.82553e-06	1.00036	1.00051	-0.4876	-2.08014	-119.183	-2.35875	-135.147	0.278617	15.9636	0.961437	0.275026	-2.35875	-135.147	-0.708913	-0.705296	-0.0162164	0.00396529	-0.971381	0.237526	2.90177	166.259	-0.868596	0.495522	2.62316	150.296	0.000281337	0.0167731	2.50922e+06	0.0175676	0.0175676	-0.0175634	-0.0175634	0.00434582	0.00434582	0.0043628
		132	0.985616	1.47446e+08	0.971439	1.00037	1.00052	-0.0144645	0.00833468	2.00089	-0.000153166	0.00027869	0.016694	7.62266e-06	1.00036	1.00051	-0.482952	-2.07482	-118.878	-2.35609	-134.994	0.281276	16.1159	0.960702	0.277581	-2.35609	-134.994	-0.707036	-0.707178	-0.0162097	0.00399206	-0.970987	0.239131	2.90012	166.165	-0.866451	0.499262	2.61885	150.049	0.000281134	0.016767	2.50831e+06	0.0175752	0.0175752	-0.0175711	-0.0175711	0.00431914	0.00431914	0.00433612
2016-02-03	34	133	0.985653	1.47452e+08	0.971511	1.00037	1.00052	-0.0144286	0.0083968	2.00089	-0.000151192	0.000278691	0.016694	7.17281e-06	1.00036	1.00051	-0.476729	-2.06773	-118.472	-2.35255	-134.791	0.284822	16.3191	0.959712	0.280986	-2.35255	-134.791	-0.704524	-0.70968	-0.0162067	0.00400426	-0.970807	0.239862	2.89937	166.122	-0.864297	0.502982	2.61455	149.803	0.000280684	0.0167536	2.50631e+06	0.0175788	0.0175788	-0.0175746	-0.0175746	0.00430701	0.00430701	0.004324
		134	0.985691	1.47457e+08	0.971586	1.00037	1.00052	-0.0143921	0.00845891	2.00089	-0.000148115	0.000278686	0.0166939	7.28256e-06	1.00036	1.00051	-0.467026	-2.05672	-117.841	-2.34705	-134.476	0.290324	16.6344	0.958151	0.286263	-2.34705	-134.476	-0.700608	-0.713546	-0.0162113	0.00398499	-0.971091	0.238709	2.90056	166.19	-0.862118	0.506707	2.61023	149.555	0.000280794	0.0167569	2.5068e+06	0.0175731	0.0175731	-0.0175689	-0.0175689	0.00432612	0.00432612	0.00434311
		135	0.985728	1.47463e+08	0.97166	1.00037	1.00052	-0.0143556	0.00852074	2.00089	-0.000145613	0.000278687	0.0166939	7.68263e-06	1.00036	1.00051	-0.459138	-2.04782	-117.331	-2.3426	-134.221	0.294775	16.8893	0.956868	0.290524	-2.3426	-134.221	-0.697426	-0.716657	-0.0162119	0.00398256	-0.971127	0.238563	2.90071	166.198	-0.859931	0.51041	2.60593	149.309	0.000281194	0.0167688	2.50858e+06	0.0175724	0.0175724	-0.0175682	-0.0175682	0.00432855	0.00432855	0.00434553
		136	0.985766	1.47469e+08	0.971735	1.00037	1.00052	-0.0143186	0.00858257	2.00089	-0.000144131	0.000278684	0.0166938	7.58065e-06	1.00036	1.00051	-0.454463	-2.04257	-117.03	-2.33997	-134.07	0.297402	17.0399	0.956101	0.293037	-2.33997	-134.07	-0.69554	-0.718487	-0.0162051	0.00400991	-0.970723	0.240203	2.89902	166.101	-0.85772	0.514116	2.60162	149.062	0.000281092	0.0167658	2.50813e+06	0.0175803	0.0175803	-0.0175761	-0.0175761	0.0043013	0.0043013	0.00431829
2016-02-04	35	137	0.985804	1.47474e+08	0.97181	1.00037	1.00051	-0.0142817	0.00864403	2.00089	-0.000141896	0.000278685	0.0166939	7.10553e-06	1.00037	1.00051	-0.447418	-2.03467	-116.578	-2.33602	-133.844	0.301349	17.266	0.954937	0.296808	-2.33602	-133.844	-0.692699	-0.721227	-0.0162037	0.00401559	-0.970639	0.240543	2.89867	166.081	-0.855504	0.517797	2.59732	148.815	0.000280617	0.0167516	2.50601e+06	0.0175819	0.0175819	-0.0175778	-0.0175778	0.00429566	0.00429566	0.00431265
		138	0.985843	1.4748e+08	0.971886	1.00037	1.00051	-0.0142441	0.00870548	2.00089	-0.000138632	0.000278681	0.0166937	7.15314e-06	1.00037	1.00051	-0.437124	-2.0232	-115.921	-2.33028	-133.515	0.307087	17.5948	0.953218	0.302284	-2.33028	-133.515	-0.688549	-0.72519	-0.0162093	0.00399245	-0.970981	0.239158	2.90009	166.163	-0.853263	0.521481	2.59301	148.568	0.000280664	0.016753	2.50622e+06	0.0175751	0.0175751	-0.0175709	-0.0175709	0.00431862	0.00431862	0.00433561
		139	0.985882	1.47486e+08	0.971963	1.00038	1.00051	-0.0142066	0.00876658	2.00089	-0.000136066	0.000278682	0.0166938	7.55294e-06	1.00037	1.0005	-0.429034	-2.01422	-115.406	-2.32579	-133.258	0.311575	17.8519	0.951852	0.306558	-2.32579	-133.258	-0.685287	-0.728273	-0.0162101	0.00398932	-0.971027	0.238971	2.90029	166.174	-0.851015	0.525141	2.58871	148.322	0.000281064	0.016765	2.508e+06	0.0175742	0.0175742	-0.01757	-0.01757	0.00432174	0.00432174	0.00433872
		140	0.985921	1.47492e+08	0.97204	1.00038	1.00051	-0.0141686	0.00882769	2.00089	-0.00013457	0.000278677	0.0166936	7.4254e-06	1.00037	1.0005	-0.424316	-2.009	-115.107	-2.32319	-133.109	0.314183	18.0014	0.951049	0.30904	-2.32319	-133.109	-0.683386	-0.730058	-0.0162031	0.0040169	-0.970618	0.240625	2.89858	166.077	-0.848743	0.528806	2.5844	148.075	0.000280936	0.0167612	2.50743e+06	0.0175821	0.0175821	-0.0175779	-0.0175779	0.00429424	0.00429424	0.00431123
2016-02-05	36	141	0.98596	1.47497e+08	0.972117	1.00038	1.00051	-0.0141306	0.00888848	2.00089	-0.000132447	0.000278678	0.0166936	6.98769e-06	1.00037	1.0005	-0.417624	-2.00163	-114.685	-2.3195	-132.897	0.317872	18.2127	0.949903	0.312546	-2.3195	-132.897	-0.680688	-0.732573	-0.0162007	0.00402674	-0.970472	0.241214	2.89798	166.042	-0.846463	0.532447	2.5801	147.829	0.000280499	0.0167481	2.50548e+06	0.0175849	0.0175849	-0.0175808	-0.0175808	0.00428445	0.00428445	0.00430144
		142	0.986	1.47503e+08	0.972195	1.00038	1.00051	-0.014092	0.00894927	2.00089	-0.000129294	0.000278674	0.0166935	7.07279e-06	1.00037	1.0005	-0.407682	-1.99071	-114.059	-2.31404	-132.585	0.32333	18.5254	0.948183	0.317726	-2.31404	-132.585	-0.67668	-0.736277	-0.0162052	0.00400815	-0.970748	0.240102	2.89912	166.107	-0.84416	0.536092	2.57579	147.582	0.000280584	0.0167506	2.50586e+06	0.0175794	0.0175794	-0.0175753	-0.0175753	0.00430289	0.00430289	0.00431988
		143	0.98604	1.47509e+08	0.972274	1.00038	1.00051	-0.0140534	0.00900973	2.00089	-0.00012679	0.000278674	0.0166935	7.48521e-06	1.00037	1.0005	-0.399785	-1.98208	-113.565	-2.30972	-132.337	0.327646	18.7727	0.946803	0.321815	-2.30972	-132.337	-0.673496	-0.739191	-0.0162053	0.00400784	-0.970752	0.240083	2.89914	166.109	-0.841849	0.539714	2.5715	147.336	0.000280996	0.0167629	2.5077e+06	0.0175794	0.0175794	-0.0175752	-0.0175752	0.00430322	0.00430322	0.0043202
		144	0.98608	1.47515e+08	0.972353	1.00038	1.00051	-0.0140144	0.0090702	2.00089	-0.000125278	0.000278672	0.0166935	7.4084e-06	1.00037	1.0005	-0.39502	-1.97689	-113.267	-2.30713	-132.189	0.330242	18.9215	0.945964	0.324272	-2.30713	-132.189	-0.671574	-0.740937	-0.0161983	0.00403561	-0.970339	0.241748	2.89743	166.01	-0.839514	0.543339	2.56718	147.089	0.000280919	0.0167607	2.50736e+06	0.0175873	0.0175873	-0.0175832	-0.0175832	0.00427552	0.00427552	0.00429252
2016-02-06	37	145	0.98612	1.47521e+08	0.972432	1.00038	1.00051	-0.0139753	0.00913034	2.00089	-0.000123115	0.000278673	0.0166935	7.00874e-06	1.00038	1.0005	-0.388199	-1.96947	-112.842	-2.30342	-131.976	0.333949	19.1338	0.944755	0.327776	-2.30342	-131.976	-0.668823	-0.743421	-0.016196	0.00404516	-0.970197	0.242319	2.89684	165.977	-0.837172	0.54694	2.56289	146.843	0.00028052	0.0167487	2.50557e+06	0.0175901	0.0175901	-0.017586	-0.017586	0.00426603	0.00426603	0.00428303
		146	0.986161	1.47528e+08	0.972513	1.00038	1.0005	-0.0139357	0.00919048	2.00089	-0.000119872	0.00027867	0.0166934	7.15661e-06	1.00038	1.0005	-0.377971	-1.9584	-112.208	-2.29789	-131.659	0.339485	19.4511	0.942926	0.333001	-2.29789	-131.659	-0.664697	-0.747113	-0.0162008	0.00402532	-0.970492	0.241133	2.89806	166.047	-0.834805	0.550546	2.55858	146.596	0.000280668	0.0167531	2.50623e+06	0.0175843	0.0175843	-0.0175801	-0.0175801	0.00428574	0.00428574	0.00430273
		147	0.986202	1.47534e+08	0.972594	1.00039	1.0005	-0.0138961	0.00925031	2.00089	-0.000117251	0.000278671	0.0166934	7.61934e-06	1.00038	1.0005	-0.369709	-1.94949	-111.698	-2.29343	-131.404	0.343939	19.7063	0.941434	0.337198	-2.29343	-131.404	-0.661363	-0.750066	-0.0162015	0.0040228	-0.97053	0.240981	2.89822	166.056	-0.832431	0.554128	2.55428	146.349	0.00028113	0.0167669	2.5083e+06	0.0175836	0.0175836	-0.0175794	-0.0175794	0.00428827	0.00428827	0.00430526
		148	0.986243	1.4754e+08	0.972675	1.00039	1.0005	-0.013856	0.00931013	2.00089	-0.000115674	0.000278668	0.0166934	7.56758e-06	1.00038	1.00049	-0.364736	-1.94415	-111.391	-2.29076	-131.251	0.346612	19.8594	0.940529	0.339713	-2.29076	-131.251	-0.659356	-0.751831	-0.0161948	0.00404938	-0.970133	0.242574	2.89657	165.961	-0.830032	0.557715	2.54996	146.102	0.000281079	0.0167654	2.50807e+06	0.0175912	0.0175912	-0.017587	-0.017587	0.00426175	0.00426175	0.00427875
2016-02-07	38	149	0.986284	1.47546e+08	0.972756	1.00039	1.0005	-0.0138159	0.00936955	2.00089	-0.000113268	0.000278668	0.0166933	7.10456e-06	1.00038	1.00049	-0.35715	-1.93601	-110.925	-2.28669	-131.018	0.350679	20.0924	0.93914	0.343536	-2.28669	-131.018	-0.656292	-0.754507	-0.0161938	0.00405305	-0.970078	0.242794	2.89635	165.948	-0.82763	0.561274	2.54567	145.856	0.000280616	0.0167516	2.506e+06	0.0175922	0.0175922	-0.0175881	-0.0175881	0.00425809	0.00425809	0.00427509
		150	0.986326	1.47552e+08	0.972838	1.00039	1.0005	-0.0137753	0.00942896	2.00089	-0.000109929	0.000278665	0.0166933	7.11518e-06	1.00038	1.00049	-0.346621	-1.92476	-110.281	-2.28107	-130.695	0.356303	20.4147	0.937193	0.348812	-2.28107	-130.695	-0.652039	-0.758186	-0.0161991	0.00403175	-0.970396	0.24152	2.89766	166.024	-0.825203	0.564836	2.54136	145.609	0.000280626	0.0167519	2.50605e+06	0.017586	0.017586	-0.0175818	-0.0175818	0.00427926	0.00427926	0.00429626
		151	0.986368	1.47559e+08	0.972921	1.00039	1.0005	-0.0137347	0.00948802	2.00089	-0.000107287	0.000278666	0.0166933	7.47774e-06	1.00038	1.00049	-0.338291	-1.9159	-109.773	-2.27663	-130.441	0.360737	20.6687	0.935637	0.352963	-2.27663	-130.441	-0.648671	-0.761069	-0.0161997	0.00402949	-0.97043	0.241384	2.8978	166.032	-0.82277	0.568374	2.53706	145.363	0.000280989	0.0167627	2.50767e+06	0.0175854	0.0175854	-0.0175812	-0.0175812	0.00428153	0.00428153	0.00429853
		152	0.98641	1.47565e+08	0.973004	1.00039	1.0005	-0.0136936	0.00954709	2.00089	-0.000105714	0.000278662	0.0166932	7.31319e-06	1.00038	1.00049	-0.333329	-1.91063	-109.471	-2.274	-130.291	0.363371	20.8196	0.934704	0.355427	-2.274	-130.291	-0.646664	-0.762775	-0.0161928	0.00405662	-0.970024	0.243011	2.89612	165.936	-0.820312	0.571916	2.53275	145.116	0.000280824	0.0167578	2.50693e+06	0.0175931	0.0175931	-0.0175889	-0.0175889	0.00425444	0.00425444	0.00427145
2016-02-08	39	153	0.986452	1.47571e+08	0.973087	1.00039	1.0005	-0.0136525	0.00960586	2.00089	-0.000103563	0.000278663	0.0166932	6.86351e-06	1.00039	1.00049	-0.326548	-1.90345	-109.059	-2.27041	-130.085	0.366962	21.0254	0.933421	0.358782	-2.27041	-130.085	-0.64392	-0.765093	-0.0161899	0.00406805	-0.969852	0.243695	2.89542	165.895	-0.817847	0.575435	2.52846	144.87	0.000280375	0.0167444	2.50492e+06	0.0175964	0.0175964	-0.0175923	-0.0175923	0.00424307	0.00424307	0.00426008
		154	0.986495	1.47578e+08	0.973172	1.00039	1.00049	-0.0136108	0.00966464	2.00089	-0.000100331	0.00027866	0.0166931	6.96155e-06	1.00039	1.00049	-0.316356	-1.89268	-108.443	-2.26503	-129.776	0.372344	21.3337	0.931477	0.3638	-2.26503	-129.776	-0.639793	-0.768547	-0.0161942	0.00405076	-0.970111	0.242661	2.89649	165.956	-0.815356	0.578959	2.52414	144.623	0.000280473	0.0167473	2.50536e+06	0.0175913	0.0175913	-0.0175872	-0.0175872	0.00426026	0.00426026	0.00427726
		155	0.986538	1.47584e+08	0.973257	1.0004	1.00049	-0.0135692	0.00972306	2.00089	-9.7795e-05	0.000278661	0.0166931	7.41145e-06	1.00039	1.00049	-0.308361	-1.88427	-107.96	-2.26082	-129.535	0.376552	21.5749	0.929938	0.367716	-2.26082	-129.535	-0.636554	-0.771232	-0.0161938	0.00405223	-0.970089	0.242749	2.89639	165.951	-0.81286	0.582459	2.51984	144.376	0.000280922	0.0167607	2.50737e+06	0.0175918	0.0175918	-0.0175876	-0.0175876	0.0042588	0.0042588	0.0042758
		156	0.986581	1.4759e+08	0.973342	1.0004	1.00049	-0.0135271	0.00978149	2.00089	-9.61497e-05	0.000278659	0.0166931	7.42304e-06	1.00039	1.00048	-0.303173	-1.87882	-107.648	-2.25809	-129.379	0.379277	21.731	0.928933	0.370249	-2.25809	-129.379	-0.63445	-0.772964	-0.0161873	0.00407796	-0.969702	0.24429	2.8948	165.86	-0.81034	0.58596	2.51553	144.129	0.000280934	0.0167611	2.50742e+06	0.0175991	0.0175991	-0.017595	-0.017595	0.00423313	0.00423313	0.00425014
2016-02-09	40	157	0.986624	1.47597e+08	0.973427	1.0004	1.00049	-0.013485	0.00983954	2.00089	-9.37502e-05	0.000278661	0.0166931	7.06106e-06	1.00039	1.00048	-0.295607	-1.87089	-107.194	-2.25413	-129.152	0.383242	21.9581	0.927457	0.373929	-2.25413	-129.152	-0.63138	-0.775473	-0.016186	0.00408333	-0.969621	0.244611	2.89447	165.841	-0.807815	0.589436	2.51123	143.883	0.000280572	0.0167503	2.50581e+06	0.0176007	0.0176007	-0.0175966	-0.0175966	0.0042278	0.0042278	0.00424481
		158	0.986668	1.47603e+08	0.973514	1.0004	1.00049	-0.0134424	0.00989759	2.00089	-9.03918e-05	0.00027866	0.0166931	7.18522e-06	1.00039	1.00048	-0.285017	-1.85982	-106.56	-2.2486	-128.835	0.388775	22.2751	0.925374	0.379055	-2.2486	-128.835	-0.62708	-0.778955	-0.016191	0.00406357	-0.969919	0.243428	2.89569	165.911	-0.805266	0.592914	2.50692	143.636	0.000280696	0.016754	2.50636e+06	0.017595	0.017595	-0.0175909	-0.0175909	0.00424749	0.00424749	0.00426449
		159	0.986712	1.4761e+08	0.973601	1.0004	1.00049	-0.0133998	0.00995526	2.00089	-8.77792e-05	0.000278662	0.0166932	7.68591e-06	1.00039	1.00048	-0.27678	-1.85124	-106.068	-2.2443	-128.589	0.393066	22.521	0.923739	0.383023	-2.2443	-128.589	-0.623731	-0.781639	-0.016191	0.00406364	-0.969918	0.243431	2.89569	165.911	-0.802712	0.596367	2.50262	143.39	0.000281197	0.0167689	2.5086e+06	0.0175951	0.0175951	-0.0175909	-0.0175909	0.00424745	0.00424745	0.00426446
		160	0.986756	1.47617e+08	0.973688	1.0004	1.00049	-0.0133567	0.0100129	2.00089	-8.62338e-05	0.00027866	0.0166931	7.65967e-06	1.00039	1.00048	-0.271907	-1.84617	-105.778	-2.24177	-128.444	0.3956	22.6662	0.922766	0.385362	-2.24177	-128.444	-0.621749	-0.783217	-0.0161837	0.00409244	-0.969483	0.245157	2.89391	165.809	-0.800132	0.599824	2.49831	143.143	0.000281171	0.0167681	2.50848e+06	0.0176032	0.0176032	-0.0175991	-0.0175991	0.0042187	0.0042187	0.00423571
2016-02-10	41	161	0.9868	1.47623e+08	0.973775	1.0004	1.00049	-0.0133136	0.0100702	2.00089	-8.38832e-05	0.00027866	0.0166931	7.23452e-06	1.00039	1.00048	-0.264495	-1.83848	-105.337	-2.23792	-128.224	0.399447	22.8866	0.921276	0.388909	-2.23792	-128.224	-0.618731	-0.785603	-0.0161819	0.00409968	-0.969374	0.245591	2.89346	165.783	-0.797548	0.603255	2.49402	142.897	0.000280746	0.0167555	2.50658e+06	0.0176053	0.0176053	-0.0176012	-0.0176012	0.00421147	0.00421147	0.00422849
		162	0.986846	1.4763e+08	0.973864	1.0004	1.00048	-0.0132699	0.0101275	2.00089	-8.04991e-05	0.000278657	0.016693	7.3326e-06	1.0004	1.00048	-0.253824	-1.82743	-104.704	-2.2324	-127.907	0.404971	23.2031	0.919114	0.393992	-2.2324	-127.907	-0.614382	-0.789008	-0.0161867	0.00408006	-0.96967	0.244417	2.89467	165.853	-0.794939	0.606689	2.4897	142.649	0.000280844	0.0167584	2.50702e+06	0.0175996	0.0175996	-0.0175955	-0.0175955	0.004231	0.004231	0.00424801
		163	0.986891	1.47637e+08	0.973953	1.00041	1.00048	-0.0132263	0.0101844	2.00089	-7.78604e-05	0.000278657	0.016693	7.80713e-06	1.0004	1.00048	-0.245504	-1.81884	-104.212	-2.2281	-127.661	0.409267	23.4493	0.917413	0.397937	-2.2281	-127.661	-0.610987	-0.791641	-0.0161867	0.00408005	-0.96967	0.244417	2.89467	165.853	-0.792326	0.610099	2.48541	142.403	0.000281318	0.0167725	2.50914e+06	0.0175996	0.0175996	-0.0175955	-0.0175955	0.004231	0.004231	0.00424801
		164	0.986936	1.47643e+08	0.974042	1.00041	1.00048	-0.0131822	0.0102413	2.00089	-7.61362e-05	0.000278655	0.0166929	7.83082e-06	1.0004	1.00047	-0.240068	-1.81323	-103.891	-2.2253	-127.5	0.412069	23.6098	0.916294	0.400506	-2.2253	-127.5	-0.608766	-0.79335	-0.0161805	0.00410447	-0.9693	0.245881	2.89316	165.766	-0.789687	0.61351	2.4811	142.156	0.000281342	0.0167732	2.50924e+06	0.0176065	0.0176065	-0.0176024	-0.0176024	0.0042066	0.0042066	0.00422362
2016-02-11	42	165	0.986981	1.4765e+08	0.974131	1.00041	1.00048	-0.0131381	0.0102978	2.00089	-7.36063e-05	0.000278654	0.0166929	7.4555e-06	1.0004	1.00047	-0.23209	-1.80502	-103.42	-2.2212	-127.265	0.416174	23.845	0.914642	0.404264	-2.2212	-127.265	-0.605505	-0.795842	-0.0161797	0.00410752	-0.969254	0.246063	2.89298	165.755	-0.787046	0.616894	2.4768	141.91	0.000280967	0.0167621	2.50757e+06	0.0176073	0.0176073	-0.0176033	-0.0176033	0.00420356	0.00420356	0.00422057
		166	0.987027	1.47657e+08	0.974222	1.00041	1.00048	-0.0130936	0.0103543	2.00089	-7.01412e-05	0.000278652	0.0166929	7.55416e-06	1.0004	1.00047	-0.221164	-1.7938	-102.777	-2.21559	-126.944	0.421783	24.1664	0.912361	0.409388	-2.21559	-126.944	-0.601031	-0.799225	-0.016185	0.0040865	-0.969572	0.244805	2.89427	165.83	-0.78438	0.620281	2.47249	141.663	0.000281065	0.016765	2.50801e+06	0.0176013	0.0176013	-0.0175972	-0.0175972	0.00422451	0.00422451	0.00424152
		167	0.987073	1.47664e+08	0.974313	1.00041	1.00048	-0.013049	0.0104104	2.00089	-6.73961e-05	0.000278653	0.0166929	8.0168e-06	1.0004	1.00047	-0.212509	-1.78494	-102.269	-2.21115	-126.69	0.426216	24.4204	0.910537	0.413428	-2.21115	-126.69	-0.597482	-0.801882	-0.0161856	0.00408424	-0.969607	0.244669	2.89441	165.838	-0.781709	0.623643	2.4682	141.417	0.000281528	0.0167788	2.51007e+06	0.0176007	0.0176007	-0.0175966	-0.0175966	0.00422677	0.00422677	0.00424378
		168	0.987119	1.47671e+08	0.974404	1.00041	1.00048	-0.0130039	0.0104666	2.00089	-6.57171e-05	0.00027865	0.0166928	7.95268e-06	1.0004	1.00047	-0.207215	-1.77952	-101.959	-2.20845	-126.535	0.428923	24.5755	0.909414	0.415892	-2.20845	-126.535	-0.595309	-0.803497	-0.0161789	0.00411021	-0.969212	0.246226	2.89281	165.746	-0.779012	0.627009	2.46388	141.17	0.000281464	0.0167769	2.50979e+06	0.017608	0.017608	-0.0176039	-0.0176039	0.00420081	0.00420081	0.00421783
2016-02-12	43	169	0.987165	1.47678e+08	0.974495	1.00041	1.00048	-0.0129588	0.0105223	2.00089	-6.33328e-05	0.00027865	0.0166928	7.54001e-06	1.00041	1.00047	-0.199697	-1.77184	-101.519	-2.20461	-126.315	0.432763	24.7955	0.907811	0.41938	-2.20461	-126.315	-0.59222	-0.805776	-0.016177	0.00411762	-0.9691	0.24667	2.89235	165.719	-0.77631	0.630351	2.45959	140.924	0.000281051	0.0167646	2.50794e+06	0.0176101	0.0176101	-0.017606	-0.017606	0.00419342	0.00419342	0.00421044
		170	0.987212	1.47685e+08	0.974588	1.00041	1.00047	-0.0129132	0.0105781	2.00089	-6.00128e-05	0.000278649	0.0166928	7.60141e-06	1.00041	1.00047	-0.189228	-1.76117	-100.908	-2.19927	-126.009	0.438099	25.1012	0.90556	0.424218	-2.19927	-126.009	-0.587912	-0.808925	-0.0161812	0.00410108	-0.969351	0.24568	2.89337	165.778	-0.773583	0.633695	2.45527	140.677	0.000281112	0.0167664	2.50822e+06	0.0176053	0.0176053	-0.0176013	-0.0176013	0.0042099	0.0042099	0.00422692
		171	0.987259	1.47692e+08	0.974681	1.00042	1.00047	-0.0128677	0.0106335	2.00089	-5.74618e-05	0.000278649	0.0166928	8.05146e-06	1.00041	1.00047	-0.181185	-1.75299	-100.439	-2.19518	-125.774	0.442191	25.3357	0.903816	0.427921	-2.19518	-125.774	-0.584596	-0.811324	-0.0161803	0.00410439	-0.969301	0.245878	2.89317	165.766	-0.770853	0.637013	2.45098	140.431	0.000281562	0.0167798	2.51023e+06	0.0176063	0.0176063	-0.0176022	-0.0176022	0.0042066	0.0042066	0.00422362
		172	0.987306	1.47699e+08	0.974774	1.00042	1.00047	-0.0128217	0.0106889	2.00089	-5.57992e-05	0.000278648	0.0166928	8.06349e-06	1.00041	1.00046	-0.175942	-1.74766	-100.133	-2.19251	-125.622	0.444855	25.4883	0.902673	0.430327	-2.19251	-125.622	-0.582433	-0.812879	-0.0161735	0.00413107	-0.968894	0.247477	2.89152	165.672	-0.768098	0.640332	2.44666	140.183	0.000281575	0.0167802	2.51028e+06	0.0176138	0.0176138	-0.0176098	-0.0176098	0.00417995	0.00417995	0.00419697
2016-02-13	44	173	0.987353	1.47706e+08	0.974867	1.00042	1.00047	-0.0127757	0.0107439	2.00089	-5.33044e-05	0.000278649	0.0166928	7.6637e-06	1.00041	1.00046	-0.168076	-1.73967	-99.676	-2.18852	-125.393	0.448848	25.7171	0.900948	0.433928	-2.18852	-125.393	-0.579182	-0.815198	-0.0161723	0.00413596	-0.968819	0.247769	2.89122	165.654	-0.765341	0.643625	2.44237	139.937	0.000281175	0.0167683	2.5085e+06	0.0176152	0.0176152	-0.0176112	-0.0176112	0.00417507	0.00417507	0.0041921
		174	0.987401	1.47713e+08	0.974961	1.00042	1.00047	-0.0127292	0.0107989	2.00089	-4.9824e-05	0.000278648	0.0166927	7.76276e-06	1.00041	1.00046	-0.157102	-1.72855	-99.0387	-2.18296	-125.074	0.454409	26.0357	0.89852	0.438932	-2.18296	-125.074	-0.57464	-0.818406	-0.0161774	0.00411578	-0.969127	0.246561	2.89246	165.726	-0.762557	0.646921	2.43805	139.69	0.000281274	0.0167712	2.50894e+06	0.0176095	0.0176095	-0.0176054	-0.0176054	0.00419521	0.00419521	0.00421223
		175	0.987449	1.4772e+08	0.975056	1.00042	1.00047	-0.0126827	0.0108535	2.00089	-4.71368e-05	0.000278648	0.0166928	8.26274e-06	1.00041	1.00046	-0.148629	-1.71998	-98.5475	-2.17867	-124.829	0.458696	26.2814	0.896631	0.442779	-2.17867	-124.829	-0.571126	-0.820862	-0.0161774	0.00411592	-0.969125	0.246569	2.89245	165.725	-0.759771	0.65019	2.43376	139.444	0.000281774	0.0167861	2.51117e+06	0.0176095	0.0176095	-0.0176055	-0.0176055	0.00419508	0.00419508	0.00421209
		176	0.987497	1.47728e+08	0.975151	1.00042	1.00047	-0.0126357	0.0109081	2.00089	-4.5388e-05	0.000278647	0.0166927	8.29947e-06	1.00041	1.00046	-0.143115	-1.7144	-98.2281	-2.17589	-124.669	0.461483	26.441	0.895393	0.445276	-2.17589	-124.669	-0.568837	-0.822451	-0.016171	0.00414061	-0.968747	0.248049	2.89093	165.638	-0.756959	0.653462	2.42944	139.197	0.00028181	0.0167872	2.51133e+06	0.0176164	0.0176164	-0.0176124	-0.0176124	0.00417039	0.00417039	0.00418742
2016-02-14	45	177	0.987545	1.47735e+08	0.975246	1.00042	1.00047	-0.0125887	0.0109623	2.00089	-4.28825e-05	0.000278648	0.0166927	7.9622e-06	1.00042	1.00046	-0.135214	-1.70643	-97.771	-2.1719	-124.441	0.465472	26.6696	0.89361	0.448845	-2.1719	-124.441	-0.565551	-0.824713	-0.0161698	0.00414559	-0.968671	0.248347	2.89062	165.62	-0.754145	0.656708	2.42515	138.951	0.000281473	0.0167772	2.50983e+06	0.0176179	0.0176179	-0.0176138	-0.0176138	0.00416542	0.00416542	0.00418245
		178	0.987594	1.47742e+08	0.975343	1.00043	1.00046	-0.0125413	0.0110165	2.00089	-3.94649e-05	0.000278647	0.0166927	8.08685e-06	1.00042	1.00046	-0.124438	-1.69556	-97.1483	-2.16646	-124.129	0.470906	26.9809	0.891158	0.453694	-2.16646	-124.129	-0.561061	-0.827774	-0.0161744	0.00412749	-0.968949	0.247263	2.89174	165.684	-0.751304	0.659956	2.42083	138.703	0.000281598	0.0167809	2.51038e+06	0.0176128	0.0176128	-0.0176087	-0.0176087	0.00418351	0.00418351	0.00420053
		179	0.987643	1.47749e+08	0.975439	1.00043	1.00046	-0.0124939	0.0110703	2.00089	-3.68399e-05	0.000278648	0.0166928	8.61233e-06	1.00042	1.00046	-0.116161	-1.68722	-96.6706	-2.1623	-123.89	0.475075	27.2198	0.889258	0.457405	-2.1623	-123.89	-0.557606	-0.830106	-0.0161739	0.00412957	-0.968917	0.247387	2.89161	165.677	-0.748462	0.663178	2.41654	138.457	0.000282123	0.0167965	2.51272e+06	0.0176134	0.0176134	-0.0176093	-0.0176093	0.00418145	0.00418145	0.00419847
		180	0.987692	1.47757e+08	0.975536	1.00043	1.00046	-0.012446	0.0111241	2.00089	-3.51782e-05	0.000278648	0.0166928	8.66198e-06	1.00042	1.00045	-0.110922	-1.68195	-96.3684	-2.15966	-123.739	0.477712	27.3709	0.888049	0.459748	-2.15966	-123.739	-0.555415	-0.831573	-0.0161669	0.00415672	-0.9685	0.249013	2.88993	165.581	-0.745592	0.666402	2.41222	138.21	0.000282173	0.016798	2.51295e+06	0.017621	0.017621	-0.017617	-0.017617	0.00415431	0.00415431	0.00417134
2016-02-15	46	181	0.987741	1.47764e+08	0.975633	1.00043	1.00046	-0.0123981	0.0111774	2.00089	-3.26075e-05	0.000278648	0.0166927	8.26172e-06	1.00042	1.00045	-0.102816	-1.67379	-95.9013	-2.15558	-123.506	0.481788	27.6044	0.886168	0.463364	-2.15558	-123.506	-0.552021	-0.83383	-0.016166	0.00416026	-0.968445	0.249226	2.88971	165.568	-0.742723	0.669599	2.40792	137.964	0.000281773	0.0167861	2.51116e+06	0.017622	0.017622	-0.017618	-0.017618	0.00415076	0.00415076	0.00416779
		182	0.987791	1.47771e+08	0.975731	1.00043	1.00046	-0.0123497	0.0112308	2.00089	-2.91488e-05	0.000278647	0.0166927	8.31112e-06	1.00042	1.00045	-0.0919102	-1.66284	-95.2735	-2.1501	-123.192	0.487267	27.9183	0.883616	0.468213	-2.1501	-123.192	-0.547444	-0.836842	-0.0161708	0.00414141	-0.968735	0.248097	2.89088	165.635	-0.739828	0.672796	2.40361	137.717	0.000281822	0.0167876	2.51138e+06	0.0176167	0.0176167	-0.0176126	-0.0176126	0.00416959	0.00416959	0.00418661
		183	0.987841	1.47779e+08	0.97583	1.00043	1.00046	-0.0123014	0.0112837	2.00089	-2.6507e-05	0.000278647	0.0166927	8.77362e-06	1.00042	1.00045	-0.0835802	-1.65447	-94.7944	-2.14592	-122.952	0.491448	28.1579	0.881651	0.471903	-2.14592	-122.952	-0.54394	-0.839124	-0.0161703	0.00414326	-0.968707	0.248208	2.89076	165.629	-0.736931	0.675968	2.39931	137.471	0.000282285	0.0168013	2.51344e+06	0.0176172	0.0176172	-0.0176132	-0.0176132	0.00416774	0.00416774	0.00418477
		184	0.987891	1.47786e+08	0.975928	1.00043	1.00046	-0.0122526	0.0113367	2.00089	-2.47773e-05	0.000278646	0.0166927	8.78569e-06	1.00042	1.00045	-0.0781263	-1.649	-94.4809	-2.14319	-122.796	0.494184	28.3146	0.880356	0.474313	-2.14319	-122.796	-0.541642	-0.840609	-0.0161638	0.00416877	-0.968314	0.249736	2.88918	165.538	-0.734008	0.679141	2.395	137.223	0.000282297	0.0168017	2.5135e+06	0.0176243	0.0176243	-0.0176203	-0.0176203	0.00414223	0.00414223	0.00415926
2016-02-16	47	185	0.987941	1.47794e+08	0.976027	1.00043	1.00046	-0.0122038	0.0113892	2.00089	-2.22645e-05	0.000278647	0.0166927	8.41097e-06	1.00043	1.00045	-0.070203	-1.64106	-94.0256	-2.13921	-122.568	0.498156	28.5423	0.878465	0.477807	-2.13921	-122.568	-0.538299	-0.842754	-0.0161624	0.00417401	-0.968233	0.25005	2.88886	165.52	-0.731083	0.682288	2.3907	136.977	0.000281922	0.0167905	2.51183e+06	0.0176258	0.0176258	-0.0176218	-0.0176218	0.004137	0.004137	0.00415403
		186	0.987991	1.47801e+08	0.976127	1.00044	1.00045	-0.0121545	0.0114418	2.00089	-1.87892e-05	0.000278646	0.0166927	8.52304e-06	1.00043	1.00045	-0.0592448	-1.63008	-93.3965	-2.13372	-122.253	0.503647	28.8569	0.875828	0.482623	-2.13372	-122.253	-0.533663	-0.845697	-0.0161673	0.00415502	-0.968526	0.248913	2.89004	165.587	-0.728131	0.685438	2.38639	136.73	0.000282034	0.0167939	2.51233e+06	0.0176205	0.0176205	-0.0176164	-0.0176164	0.00415598	0.00415598	0.004173
		187	0.988042	1.47809e+08	0.976227	1.00044	1.00045	-0.0121052	0.0114939	2.00089	-1.61301e-05	0.000278646	0.0166927	9.04814e-06	1.00043	1.00044	-0.0508605	-1.62168	-92.9154	-2.12952	-122.013	0.507846	29.0974	0.873794	0.486296	-2.12952	-122.013	-0.530108	-0.84793	-0.0161669	0.00415664	-0.968501	0.24901	2.88994	165.581	-0.725178	0.688561	2.38209	136.484	0.000282559	0.0168095	2.51466e+06	0.0176209	0.0176209	-0.0176169	-0.0176169	0.00415436	0.00415436	0.00417139
		188	0.988093	1.47817e+08	0.976328	1.00044	1.00045	-0.0120554	0.0115461	2.00089	-1.43827e-05	0.000278646	0.0166927	9.1229e-06	1.00043	1.00044	-0.0453505	-1.61616	-92.5993	-2.12677	-121.855	0.510604	29.2554	0.87245	0.488704	-2.12677	-121.855	-0.527767	-0.849389	-0.0161604	0.00418184	-0.968112	0.250519	2.88838	165.492	-0.722199	0.691686	2.37777	136.236	0.000282634	0.0168117	2.515e+06	0.017628	0.017628	-0.017624	-0.017624	0.00412915	0.00412915	0.00414619
2016-02-17	48	189	0.988144	1.47824e+08	0.976428	1.00044	1.00045	-0.0120057	0.0115978	2.00089	-1.16998e-05	0.000278645	0.0166927	8.73493e-06	1.00043	1.00044	-0.0368911	-1.6077	-92.1142	-2.12253	-121.612	0.514837	29.498	0.870373	0.492393	-2.12253	-121.612	-0.524167	-0.851616	-0.0161601	0.00418287	-0.968096	0.250581	2.88831	165.488	-0.71922	0.694783	2.37348	135.99	0.000282246	0.0168002	2.51327e+06	0.0176282	0.0176282	-0.0176242	-0.0176242	0.00412811	0.00412811	0.00414515
		190	0.988196	1.47832e+08	0.97653	1.00044	1.00045	-0.0119555	0.0116495	2.00089	-8.17739e-06	0.000278645	0.0166927	8.77208e-06	1.00043	1.00044	-0.0257844	-1.59658	-91.4775	-2.11698	-121.294	0.520393	29.8163	0.867624	0.497221	-2.11698	-121.294	-0.519427	-0.854515	-0.0161653	0.0041628	-0.968406	0.249379	2.88955	165.559	-0.716215	0.697879	2.36916	135.743	0.000282283	0.0168013	2.51344e+06	0.0176226	0.0176226	-0.0176186	-0.0176186	0.00414818	0.00414818	0.00416521
		191	0.988247	1.4784e+08	0.976633	1.00044	1.00045	-0.0119054	0.0117007	2.00089	-5.52017e-06	0.000278644	0.0166926	9.24688e-06	1.00043	1.00044	-0.0174058	-1.5882	-90.9973	-2.11279	-121.054	0.524583	30.0564	0.865533	0.500853	-2.11279	-121.054	-0.515842	-0.856684	-0.0161648	0.0041645	-0.96838	0.249481	2.88945	165.553	-0.713211	0.70095	2.36486	135.497	0.000282758	0.0168154	2.51555e+06	0.0176231	0.0176231	-0.0176191	-0.0176191	0.00414647	0.00414647	0.0041635
		192	0.988299	1.47847e+08	0.976735	1.00044	1.00045	-0.0118548	0.0117519	2.00089	-3.74866e-06	0.000278644	0.0166926	9.28407e-06	1.00044	1.00044	-0.01182	-1.58262	-90.6773	-2.10999	-120.894	0.527377	30.2165	0.86413	0.503268	-2.10999	-120.894	-0.513447	-0.858121	-0.0161584	0.00418909	-0.967999	0.250954	2.88793	165.466	-0.71018	0.70402	2.36055	135.25	0.000282795	0.0168165	2.51571e+06	0.0176299	0.0176299	-0.0176259	-0.0176259	0.00412186	0.00412186	0.0041389
2016-02-18	49	193	0.988351	1.47855e+08	0.976837	1.00045	1.00045	-0.0118042	0.0118028	2.00089	-1.21833e-06	0.000278644	0.0166926	8.94697e-06	1.00044	1.00044	-0.00384155	-1.57464	-90.2201	-2.106	-120.665	0.531366	30.445	0.862116	0.506712	-2.106	-120.665	-0.51002	-0.860163	-0.0161572	0.00419409	-0.967921	0.251254	2.88762	165.448	-0.707147	0.707067	2.35625	135.003	0.000282458	0.0168065	2.51421e+06	0.0176313	0.0176313	-0.0176273	-0.0176273	0.00411687	0.00411687	0.00413391
		194	0.988403	1.47863e+08	0.976941	1.00045	1.00044	-0.0117531	0.0118537	2.00089	2.20152e-06	0.000278645	0.0166927	9.05981e-06	1.00044	1.00044	0.00694168	-1.56385	-89.6023	-2.10061	-120.356	0.536758	30.754	0.859371	0.511352	-2.10061	-120.356	-0.505375	-0.8629	-0.0161617	0.00417673	-0.968191	0.250214	2.88869	165.51	-0.704088	0.710113	2.35193	134.756	0.000282571	0.0168098	2.51472e+06	0.0176265	0.0176265	-0.0176225	-0.0176225	0.00413425	0.00413425	0.00415128
		195	0.988456	1.47871e+08	0.977045	1.00045	1.00044	-0.011702	0.0119041	2.00089	4.8061e-06	0.000278646	0.0166927	9.58549e-06	1.00044	1.00043	0.0151543	-1.55564	-89.1317	-2.09651	-120.121	0.540864	30.9892	0.857264	0.514877	-2.09651	-120.121	-0.501827	-0.864968	-0.0161609	0.00417987	-0.968142	0.250401	2.8885	165.499	-0.701028	0.713134	2.34763	134.51	0.000283097	0.0168255	2.51705e+06	0.0176274	0.0176274	-0.0176234	-0.0176234	0.00413113	0.00413113	0.00414816
		196	0.988508	1.47879e+08	0.977149	1.00045	1.00044	-0.0116506	0.0119546	2.00089	6.52547e-06	0.000278648	0.0166927	9.67367e-06	1.00044	1.00043	0.0205757	-1.55022	-88.821	-2.09379	-119.966	0.543575	31.1446	0.855865	0.517199	-2.09379	-119.966	-0.49948	-0.866326	-0.0161542	0.00420586	-0.967738	0.251957	2.88689	165.407	-0.697941	0.716155	2.34331	134.262	0.000283185	0.0168281	2.51745e+06	0.0176347	0.0176347	-0.0176307	-0.0176307	0.00410513	0.00410513	0.00412217
2016-02-19	50	197	0.988561	1.47887e+08	0.977253	1.00045	1.00044	-0.0115991	0.0120045	2.00089	9.25721e-06	0.000278647	0.0166927	9.26098e-06	1.00044	1.00043	0.0291892	-1.5416	-88.3273	-2.08949	-119.719	0.547883	31.3914	0.853629	0.520882	-2.08949	-119.719	-0.495743	-0.868469	-0.0161542	0.00420569	-0.967741	0.251947	2.8869	165.407	-0.694857	0.719148	2.33902	134.016	0.000282772	0.0168158	2.51561e+06	0.0176346	0.0176346	-0.0176307	-0.0176307	0.00410529	0.00410529	0.00412234
		198	0.988614	1.47895e+08	0.977358	1.00045	1.00044	-0.0115472	0.0120545	2.00089	1.28049e-05	0.000278648	0.0166927	9.26124e-06	1.00044	1.00043	0.0403754	-1.53041	-87.686	-2.08389	-119.398	0.55348	31.7121	0.8507	0.525651	-2.08389	-119.398	-0.490875	-0.87123	-0.0161596	0.004185	-0.968063	0.250707	2.88818	165.481	-0.691747	0.72214	2.3347	133.769	0.000282772	0.0168158	2.51561e+06	0.0176289	0.0176289	-0.0176249	-0.0176249	0.00412602	0.00412602	0.00414306
		199	0.988668	1.47903e+08	0.977464	1.00045	1.00044	-0.0114953	0.012104	2.00089	1.54884e-05	0.000278648	0.0166928	9.69896e-06	1.00044	1.00043	0.0488369	-1.52194	-87.2007	-2.07965	-119.155	0.557715	31.9547	0.848467	0.529249	-2.07965	-119.155	-0.487181	-0.873301	-0.0161594	0.00418601	-0.968047	0.250768	2.88812	165.477	-0.688637	0.725106	2.3304	133.522	0.00028321	0.0168288	2.51756e+06	0.0176292	0.0176292	-0.0176252	-0.0176252	0.00412501	0.00412501	0.00414205
		200	0.988721	1.47911e+08	0.977569	1.00046	1.00044	-0.0114429	0.0121535	2.00089	1.73378e-05	0.000278649	0.0166928	9.72455e-06	1.00045	1.00043	0.0546684	-1.5161	-86.8662	-2.07674	-118.988	0.560635	32.122	0.846918	0.531724	-2.07674	-118.988	-0.484629	-0.87472	-0.0161535	0.00420857	-0.967696	0.252119	2.88672	165.397	-0.685501	0.728071	2.32609	133.275	0.000283236	0.0168296	2.51767e+06	0.0176355	0.0176355	-0.0176315	-0.0176315	0.00410244	0.00410244	0.00411948
2016-02-20	51	201	0.988775	1.47919e+08	0.977675	1.00046	1.00044	-0.0113906	0.0122026	2.00089	2.01242e-05	0.000278649	0.0166928	9.28712e-06	1.00045	1.00043	0.0634543	-1.5073	-86.3619	-2.07233	-118.736	0.565035	32.3741	0.84457	0.535446	-2.07233	-118.736	-0.480775	-0.876844	-0.016154	0.00420689	-0.967723	0.252018	2.88683	165.403	-0.682367	0.73101	2.32179	133.029	0.000282798	0.0168166	2.51573e+06	0.017635	0.017635	-0.017631	-0.017631	0.00410413	0.00410413	0.00412117
		202	0.988829	1.47927e+08	0.977782	1.00046	1.00043	-0.0113379	0.0122516	2.00089	2.37024e-05	0.000278651	0.0166928	9.25037e-06	1.00045	1.00043	0.0747367	-1.49599	-85.7139	-2.06668	-118.412	0.57069	32.6981	0.841528	0.540213	-2.06668	-118.412	-0.475809	-0.879549	-0.0161597	0.00418523	-0.96806	0.25072	2.88817	165.48	-0.679207	0.733946	2.31748	132.782	0.000282761	0.0168155	2.51556e+06	0.017629	0.017629	-0.017625	-0.017625	0.00412583	0.00412583	0.00414286
		203	0.988883	1.47935e+08	0.977889	1.00046	1.00043	-0.0112852	0.0123002	2.00089	2.63181e-05	0.00027865	0.0166928	9.70038e-06	1.00045	1.00042	0.0829844	-1.48772	-85.2399	-2.06254	-118.175	0.574827	32.9352	0.839286	0.543689	-2.06254	-118.175	-0.472166	-0.881509	-0.016159	0.00418777	-0.96802	0.250872	2.88801	165.471	-0.67605	0.736856	2.31318	132.536	0.000283211	0.0168289	2.51757e+06	0.0176297	0.0176297	-0.0176257	-0.0176257	0.00412328	0.00412328	0.00414032
		204	0.988937	1.47943e+08	0.977997	1.00046	1.00043	-0.011232	0.0123488	2.00089	2.79991e-05	0.00027865	0.0166928	9.68777e-06	1.00045	1.00042	0.088285	-1.4824	-84.935	-2.05988	-118.023	0.577487	33.0876	0.837837	0.54592	-2.05988	-118.023	-0.46982	-0.882762	-0.016152	0.0042145	-0.967604	0.252474	2.88636	165.376	-0.672864	0.739766	2.30887	132.288	0.000283199	0.0168285	2.51751e+06	0.0176371	0.0176371	-0.0176332	-0.0176332	0.00409651	0.00409651	0.00411356
2016-02-21	52	205	0.988991	1.47951e+08	0.978104	1.00046	1.00043	-0.0111788	0.0123969	2.00089	3.05164e-05	0.00027865	0.0166928	9.26268e-06	1.00045	1.00042	0.0962224	-1.47442	-84.4783	-2.0559	-117.794	0.581473	33.3159	0.835655	0.549255	-2.0559	-117.794	-0.466298	-0.884628	-0.0161507	0.00421954	-0.967525	0.252776	2.88604	165.358	-0.669678	0.742651	2.30457	132.042	0.000282774	0.0168159	2.51562e+06	0.0176385	0.0176385	-0.0176346	-0.0176346	0.00409146	0.00409146	0.0041085
		206	0.989046	1.47959e+08	0.978213	1.00046	1.00043	-0.0111252	0.0124451	2.00089	3.39249e-05	0.00027865	0.0166928	9.28781e-06	1.00045	1.00042	0.10697	-1.46362	-83.8593	-2.0505	-117.485	0.586874	33.6254	0.832676	0.553761	-2.0505	-117.485	-0.461513	-0.887134	-0.0161553	0.00420203	-0.967798	0.251727	2.88713	165.42	-0.666465	0.745536	2.30025	131.795	0.000282799	0.0168166	2.51573e+06	0.0176337	0.0176337	-0.0176297	-0.0176297	0.00410899	0.00410899	0.00412604
		207	0.989102	1.47967e+08	0.978322	1.00046	1.00043	-0.0110715	0.0124928	2.00089	3.65197e-05	0.00027865	0.0166928	9.72554e-06	1.00046	1.00042	0.115151	-1.45539	-83.3876	-2.04638	-117.249	0.590991	33.8613	0.830389	0.557184	-2.04638	-117.249	-0.457857	-0.889026	-0.0161545	0.00420502	-0.967752	0.251906	2.88694	165.41	-0.663252	0.748396	2.29595	131.548	0.000283237	0.0168296	2.51768e+06	0.0176345	0.0176345	-0.0176305	-0.0176305	0.004106	0.004106	0.00412304
		208	0.989157	1.47976e+08	0.978431	1.00047	1.00043	-0.0110175	0.0125406	2.00089	3.83573e-05	0.000278652	0.0166929	9.78924e-06	1.00046	1.00042	0.120946	-1.44955	-83.0533	-2.04346	-117.082	0.593908	34.0284	0.82876	0.559604	-2.04346	-117.082	-0.455261	-0.890358	-0.0161486	0.00422766	-0.967398	0.253262	2.88554	165.329	-0.660014	0.751253	2.29163	131.301	0.0002833	0.0168315	2.51796e+06	0.0176408	0.0176408	-0.0176369	-0.0176369	0.00408335	0.00408335	0.0041004
2016-02-22	53	209	0.989212	1.47984e+08	0.97854	1.00047	1.00043	-0.0109635	0.0125878	2.00089	4.11582e-05	0.000278652	0.0166929	9.37709e-06	1.00046	1.00042	0.129777	-1.44065	-82.5433	-2.03901	-116.827	0.598359	34.2834	0.826261	0.563287	-2.03901	-116.827	-0.451294	-0.892375	-0.0161493	0.00422522	-0.967436	0.253115	2.88569	165.338	-0.656778	0.754084	2.28733	131.055	0.000282888	0.0168193	2.51613e+06	0.0176402	0.0176402	-0.0176362	-0.0176362	0.00408581	0.00408581	0.00410286
		210	0.989268	1.47992e+08	0.97865	1.00047	1.00042	-0.0109091	0.0126351	2.00089	4.47272e-05	0.000278655	0.016693	9.35345e-06	1.00046	1.00041	0.141031	-1.42929	-81.8925	-2.03333	-116.501	0.604038	34.6088	0.823049	0.567971	-2.03333	-116.501	-0.446219	-0.894924	-0.0161551	0.00420323	-0.96778	0.251797	2.88706	165.416	-0.653517	0.756912	2.28302	130.807	0.000282864	0.0168186	2.51602e+06	0.0176342	0.0176342	-0.0176302	-0.0176302	0.00410787	0.00410787	0.00412491
		211	0.989323	1.48001e+08	0.978761	1.00047	1.00042	-0.0108547	0.0126819	2.00089	4.73102e-05	0.000278655	0.016693	9.82872e-06	1.00046	1.00041	0.149175	-1.42106	-81.4209	-2.02922	-116.266	0.608154	34.8447	0.820704	0.571353	-2.02922	-116.266	-0.442532	-0.896753	-0.0161544	0.00420617	-0.967734	0.251972	2.88687	165.406	-0.650258	0.759713	2.27872	130.561	0.00028334	0.0168327	2.51814e+06	0.017635	0.017635	-0.017631	-0.017631	0.00410493	0.00410493	0.00412198
		212	0.989379	1.48009e+08	0.978871	1.00047	1.00042	-0.0107999	0.0127286	2.00089	4.90607e-05	0.000278656	0.016693	9.89212e-06	1.00046	1.00041	0.154695	-1.41548	-81.1009	-2.02642	-116.106	0.610946	35.0046	0.819106	0.573643	-2.02642	-116.106	-0.440026	-0.897985	-0.016148	0.00423079	-0.967349	0.253447	2.88535	165.318	-0.646973	0.762513	2.2744	130.314	0.000283403	0.0168346	2.51842e+06	0.0176418	0.0176418	-0.0176379	-0.0176379	0.00408028	0.00408028	0.00409733
2016-02-23	54	213	0.989435	1.48017e+08	0.978982	1.00047	1.00042	-0.0107451	0.0127749	2.00089	5.18004e-05	0.000278656	0.016693	9.46693e-06	1.00046	1.00041	0.163334	-1.40673	-80.5996	-2.02205	-115.855	0.615321	35.2553	0.816588	0.577221	-2.02205	-115.855	-0.436093	-0.899902	-0.0161483	0.00422953	-0.967369	0.253372	2.88543	165.323	-0.643691	0.765286	2.27011	130.068	0.000282978	0.0168219	2.51653e+06	0.0176415	0.0176415	-0.0176375	-0.0176375	0.00408154	0.00408154	0.00409859
		214	0.989492	1.48026e+08	0.979094	1.00047	1.00042	-0.0106899	0.0128212	2.00089	5.53334e-05	0.000278657	0.016693	9.44268e-06	1.00046	1.00041	0.174474	-1.39543	-79.952	-2.0164	-115.531	0.620972	35.5791	0.813313	0.581826	-2.0164	-115.531	-0.431001	-0.902352	-0.0161539	0.00420796	-0.967707	0.252079	2.88676	165.399	-0.640382	0.768056	2.26579	129.82	0.000282954	0.0168212	2.51642e+06	0.0176355	0.0176355	-0.0176316	-0.0176316	0.00410316	0.00410316	0.0041202
		215	0.989549	1.48034e+08	0.979206	1.00048	1.00042	-0.0106347	0.012867	2.00089	5.7955e-05	0.000278657	0.016693	9.88023e-06	1.00047	1.00041	0.18274	-1.38702	-79.4706	-2.0122	-115.29	0.625173	35.8198	0.810862	0.585238	-2.0122	-115.29	-0.427206	-0.904154	-0.0161535	0.00420953	-0.967682	0.252173	2.88667	165.394	-0.637075	0.770802	2.26149	129.574	0.000283391	0.0168342	2.51836e+06	0.017636	0.017636	-0.017632	-0.017632	0.00410159	0.00410159	0.00411863
		216	0.989605	1.48043e+08	0.979319	1.00048	1.00042	-0.0105791	0.0129128	2.00089	5.97194e-05	0.000278657	0.016693	9.89336e-06	1.00047	1.00041	0.188303	-1.38136	-79.1462	-2.00937	-115.128	0.628004	35.982	0.809202	0.587531	-2.00937	-115.128	-0.424645	-0.90536	-0.0161473	0.00423355	-0.967306	0.253612	2.88518	165.309	-0.633741	0.773545	2.25718	129.327	0.000283404	0.0168346	2.51842e+06	0.0176426	0.0176426	-0.0176387	-0.0176387	0.00407753	0.00407753	0.00409459
2016-02-24	55	217	0.989662	1.48051e+08	0.979431	1.00048	1.00042	-0.0105234	0.0129582	2.00089	6.24228e-05	0.000278657	0.016693	9.44314e-06	1.00047	1.00041	0.196827	-1.37268	-78.6485	-2.00502	-114.879	0.632347	36.2308	0.806642	0.59104	-2.00502	-114.879	-0.420709	-0.907196	-0.0161474	0.00423284	-0.967317	0.25357	2.88522	165.311	-0.630409	0.776263	2.25288	129.08	0.000282954	0.0168212	2.51642e+06	0.0176424	0.0176424	-0.0176385	-0.0176385	0.00407823	0.00407823	0.00409529
		218	0.989719	1.4806e+08	0.979544	1.00048	1.00041	-0.0104674	0.0130035	2.00089	6.58211e-05	0.000278659	0.0166931	9.34448e-06	1.00047	1.0004	0.207543	-1.36173	-78.0216	-1.99955	-114.566	0.637818	36.5443	0.803397	0.595444	-1.99955	-114.566	-0.415739	-0.909484	-0.0161524	0.00421421	-0.967609	0.252452	2.88638	165.377	-0.627053	0.778976	2.24856	128.833	0.000282855	0.0168183	2.51598e+06	0.0176373	0.0176373	-0.0176334	-0.0176334	0.00409694	0.00409694	0.00411398
		219	0.989777	1.48068e+08	0.979658	1.00048	1.00041	-0.0104115	0.0130484	2.00089	6.82345e-05	0.000278658	0.0166931	9.74455e-06	1.00047	1.0004	0.215153	-1.35395	-77.5755	-1.99566	-114.343	0.641711	36.7673	0.801073	0.598567	-1.99566	-114.343	-0.412196	-0.911095	-0.0161507	0.00422074	-0.967507	0.252844	2.88597	165.354	-0.6237	0.781664	2.24426	128.587	0.000283256	0.0168302	2.51776e+06	0.0176391	0.0176391	-0.0176352	-0.0176352	0.00409039	0.00409039	0.00410744
		220	0.989834	1.48077e+08	0.979771	1.00048	1.00041	-0.0103551	0.0130932	2.00089	6.9867e-05	0.00027866	0.0166931	9.75819e-06	1.00047	1.0004	0.2203	-1.34867	-77.2733	-1.99302	-114.192	0.644348	36.9184	0.799492	0.600677	-1.99302	-114.192	-0.409792	-0.912179	-0.0161436	0.00424786	-0.967081	0.254468	2.8843	165.258	-0.620321	0.784348	2.23995	128.34	0.000283269	0.0168306	2.51782e+06	0.0176466	0.0176466	-0.0176427	-0.0176427	0.00406323	0.00406323	0.00408029
2016-02-25	56	221	0.989891	1.48086e+08	0.979885	1.00048	1.00041	-0.0102987	0.0131376	2.00089	7.25151e-05	0.000278659	0.0166931	9.27039e-06	1.00047	1.0004	0.22865	-1.34011	-76.7824	-1.98874	-113.946	0.648632	37.1639	0.796911	0.604097	-1.98874	-113.946	-0.40588	-0.913926	-0.0161435	0.00424805	-0.967078	0.25448	2.88428	165.257	-0.616945	0.787007	2.23565	128.093	0.000282781	0.0168161	2.51565e+06	0.0176467	0.0176467	-0.0176427	-0.0176427	0.00406302	0.00406302	0.00408007
		222	0.98995	1.48094e+08	0.98	1.00048	1.00041	-0.010242	0.0131819	2.00089	7.59328e-05	0.000278661	0.0166931	9.17135e-06	1.00047	1.0004	0.239426	-1.32902	-76.1473	-1.9832	-113.629	0.654174	37.4814	0.793551	0.608504	-1.9832	-113.629	-0.400809	-0.916162	-0.0161488	0.00422825	-0.96739	0.253293	2.88551	165.328	-0.613543	0.789661	2.23134	127.846	0.000282682	0.0168132	2.51521e+06	0.0176413	0.0176413	-0.0176373	-0.0176373	0.00408289	0.00408289	0.00409994
		223	0.990008	1.48103e+08	0.980115	1.00049	1.00041	-0.0101852	0.0132258	2.00089	7.83908e-05	0.00027866	0.0166931	9.55861e-06	1.00048	1.0004	0.247176	-1.32103	-75.6895	-1.9792	-113.4	0.658169	37.7103	0.791113	0.61167	-1.9792	-113.4	-0.397145	-0.917756	-0.0161475	0.00423312	-0.967313	0.253585	2.88521	165.31	-0.610144	0.792291	2.22704	127.6	0.00028307	0.0168247	2.51694e+06	0.0176426	0.0176426	-0.0176386	-0.0176386	0.004078	0.004078	0.00409505
		224	0.990066	1.48112e+08	0.98023	1.00049	1.00041	-0.0101281	0.0132697	2.00089	8.01189e-05	0.000278661	0.0166932	9.58478e-06	1.00048	1.0004	0.252625	-1.3154	-75.3671	-1.97639	-113.239	0.660983	37.8715	0.789389	0.613893	-1.97639	-113.239	-0.394561	-0.91887	-0.0161411	0.00425737	-0.966931	0.255037	2.88371	165.224	-0.60672	0.794916	2.22272	127.353	0.000283096	0.0168255	2.51705e+06	0.0176493	0.0176493	-0.0176454	-0.0176454	0.00405371	0.00405371	0.00407077
2016-02-26	57	225	0.990124	1.4812e+08	0.980346	1.00049	1.0004	-0.0100709	0.0133131	2.00089	8.2787e-05	0.000278661	0.0166931	9.14743e-06	1.00048	1.0004	0.261039	-1.3067	-74.8683	-1.97203	-112.989	0.665336	38.1209	0.78671	0.617323	-1.97203	-112.989	-0.390558	-0.920578	-0.0161414	0.00425648	-0.966945	0.254983	2.88376	165.227	-0.603298	0.797516	2.21843	127.106	0.000282658	0.0168124	2.51511e+06	0.017649	0.017649	-0.0176451	-0.0176451	0.0040546	0.0040546	0.00407166
		226	0.990183	1.48129e+08	0.980462	1.00049	1.0004	-0.0100135	0.0133564	2.00089	8.61759e-05	0.000278664	0.0166932	9.07418e-06	1.00048	1.00039	0.271724	-1.29561	-74.2331	-1.96649	-112.672	0.670879	38.4385	0.783276	0.621675	-1.96649	-112.672	-0.385449	-0.922729	-0.0161467	0.00423667	-0.967258	0.253796	2.88499	165.298	-0.599851	0.800112	2.21411	126.859	0.000282585	0.0168103	2.51478e+06	0.0176437	0.0176437	-0.0176397	-0.0176397	0.00407451	0.00407451	0.00409156
		227	0.990242	1.48138e+08	0.980579	1.00049	1.0004	-0.00995597	0.0133994	2.00089	8.86302e-05	0.000278665	0.0166933	9.4748e-06	1.00048	1.00039	0.279463	-1.28756	-73.7719	-1.96247	-112.441	0.674904	38.6692	0.780767	0.624822	-1.96247	-112.441	-0.381732	-0.924273	-0.0161455	0.00424108	-0.967189	0.254059	2.88472	165.282	-0.596407	0.802682	2.20981	126.613	0.000282986	0.0168222	2.51656e+06	0.0176449	0.0176449	-0.017641	-0.017641	0.0040701	0.0040701	0.00408715
		228	0.990301	1.48147e+08	0.980695	1.00049	1.0004	-0.00989806	0.0134423	2.00089	9.02288e-05	0.000278667	0.0166933	9.45129e-06	1.00048	1.00039	0.284503	-1.28231	-73.4708	-1.95984	-112.29	0.677531	38.8197	0.779123	0.626871	-1.95984	-112.29	-0.379303	-0.925273	-0.0161384	0.0042684	-0.966758	0.255695	2.88303	165.185	-0.592935	0.80525	2.2055	126.366	0.000282962	0.0168215	2.51646e+06	0.0176525	0.0176525	-0.0176486	-0.0176486	0.00404273	0.00404273	0.00405979
2016-02-27	58	229	0.990359	1.48156e+08	0.980812	1.00049	1.0004	-0.00984015	0.0134847	2.00089	9.28441e-05	0.000278666	0.0166933	8.92618e-06	1.00048	1.00039	0.29275	-1.2737	-72.9774	-1.95553	-112.044	0.681837	39.0664	0.776416	0.630221	-1.95553	-112.044	-0.375315	-0.926897	-0.0161384	0.0042683	-0.966759	0.255689	2.88303	165.186	-0.589467	0.807793	2.20119	126.119	0.000282437	0.0168059	2.51412e+06	0.0176524	0.0176524	-0.0176485	-0.0176485	0.00404282	0.00404282	0.00405988
		230	0.990419	1.48165e+08	0.98093	1.00049	1.0004	-0.00978188	0.0135272	2.00089	9.61557e-05	0.000278669	0.0166934	8.75288e-06	1.00048	1.00039	0.303192	-1.26276	-72.3506	-1.95006	-111.73	0.687307	39.3798	0.772957	0.634458	-1.95006	-111.73	-0.370239	-0.928936	-0.0161434	0.00424972	-0.967053	0.254575	2.88418	165.252	-0.585974	0.81033	2.19688	125.872	0.000282264	0.0168007	2.51335e+06	0.0176474	0.0176474	-0.0176435	-0.0176435	0.0040615	0.0040615	0.00407855
		231	0.990479	1.48173e+08	0.981048	1.0005	1.0004	-0.00972362	0.0135691	2.00089	9.84347e-05	0.000278668	0.0166934	9.1027e-06	1.00049	1.00039	0.310378	-1.25521	-71.918	-1.94629	-111.514	0.691082	39.5961	0.770557	0.637371	-1.94629	-111.514	-0.36673	-0.930327	-0.0161411	0.00425817	-0.966919	0.255082	2.88366	165.222	-0.582485	0.812842	2.19258	125.625	0.000282614	0.0168111	2.51491e+06	0.0176497	0.0176497	-0.0176458	-0.0176458	0.004053	0.004053	0.00407006
		232	0.990538	1.48182e+08	0.981166	1.0005	1.0004	-0.00966505	0.013611	2.00089	0.000100086	0.000278671	0.0166935	9.1421e-06	1.00049	1.00039	0.315584	-1.24972	-71.6039	-1.94355	-111.357	0.693823	39.7531	0.768807	0.639481	-1.94355	-111.357	-0.364179	-0.931329	-0.0161345	0.00428359	-0.966517	0.256603	2.88209	165.131	-0.578972	0.815347	2.18826	125.378	0.000282653	0.0168123	2.51508e+06	0.0176567	0.0176567	-0.0176528	-0.0176528	0.00402754	0.00402754	0.00404461
2016-02-28	59	233	0.990598	1.48191e+08	0.981284	1.0005	1.00039	-0.00960647	0.0136524	2.00089	0.000102754	0.000278671	0.0166934	8.67981e-06	1.00049	1.00039	0.323997	-1.24085	-71.0952	-1.93911	-111.103	0.698262	40.0075	0.76596	0.642888	-1.93911	-111.103	-0.36004	-0.932937	-0.0161351	0.00428128	-0.966554	0.256465	2.88223	165.14	-0.575464	0.817827	2.18397	125.132	0.000282191	0.0167985	2.51303e+06	0.0176561	0.0176561	-0.0176522	-0.0176522	0.00402986	0.00402986	0.00404692
		234	0.990658	1.482e+08	0.981403	1.0005	1.00039	-0.00954753	0.0136938	2.00089	0.000106144	0.000278674	0.0166935	8.58179e-06	1.00049	1.00038	0.334685	-1.22952	-70.4466	-1.93345	-110.778	0.703923	40.3318	0.762309	0.647213	-1.93345	-110.778	-0.354754	-0.93496	-0.0161409	0.00425959	-0.966898	0.255164	2.88358	165.217	-0.57193	0.820303	2.17965	124.885	0.000282093	0.0167956	2.51259e+06	0.0176503	0.0176503	-0.0176463	-0.0176463	0.00405167	0.00405167	0.00406873
		235	0.990718	1.48209e+08	0.981523	1.0005	1.00039	-0.0094886	0.0137347	2.00089	0.000108575	0.000278675	0.0166935	8.96981e-06	1.00049	1.00038	0.342353	-1.22138	-69.9797	-1.92937	-110.545	0.707997	40.5652	0.759666	0.650313	-1.92937	-110.545	-0.350942	-0.936397	-0.01614	0.0042632	-0.966841	0.25538	2.88335	165.204	-0.568399	0.822753	2.17535	124.639	0.000282481	0.0168072	2.51432e+06	0.0176513	0.0176513	-0.0176473	-0.0176473	0.00404805	0.00404805	0.00406511
		236	0.990779	1.48218e+08	0.981642	1.0005	1.00039	-0.00942928	0.0137756	2.00089	0.000110253	0.000278678	0.0166937	8.98436e-06	1.00049	1.00038	0.347644	-1.21574	-69.6567	-1.92655	-110.383	0.710815	40.7267	0.75783	0.652452	-1.92655	-110.383	-0.348301	-0.937383	-0.0161337	0.0042874	-0.966457	0.256828	2.88185	165.118	-0.564842	0.825199	2.17104	124.391	0.000282495	0.0168076	2.51438e+06	0.017658	0.017658	-0.0176541	-0.0176541	0.00402382	0.00402382	0.00404088
2016-03-01	60	237	0.990839	1.48227e+08	0.981762	1.0005	1.00039	-0.00936996	0.0138159	2.00089	0.00011305	0.000278676	0.0166936	8.44646e-06	1.00049	1.00038	0.356463	-1.20632	-69.1169	-1.92184	-110.114	0.715527	40.9967	0.754748	0.656015	-1.92184	-110.114	-0.343881	-0.939013	-0.0161354	0.00428072	-0.966563	0.256428	2.88227	165.142	-0.561291	0.827619	2.16674	124.145	0.000281957	0.0167916	2.51199e+06	0.0176561	0.0176561	-0.0176522	-0.0176522	0.00403051	0.00403051	0.00404757
		238	0.9909	1.48237e+08	0.981883	1.0005	1.00039	-0.00931034	0.0138563	2.00089	0.000116471	0.000278679	0.0166937	8.22337e-06	1.0005	1.00038	0.367247	-1.19475	-68.4541	-1.91606	-109.782	0.721311	41.3281	0.750941	0.660369	-1.91606	-109.782	-0.338444	-0.940986	-0.0161418	0.004257	-0.966939	0.255006	2.88374	165.226	-0.557716	0.830032	2.16243	123.898	0.000281734	0.0167849	2.51099e+06	0.0176497	0.0176497	-0.0176458	-0.0176458	0.00405435	0.00405435	0.00407141
		239	0.990961	1.48246e+08	0.982003	1.0005	1.00039	-0.00925071	0.0138961	2.00089	0.000118834	0.000278678	0.0166937	8.53555e-06	1.0005	1.00038	0.374701	-1.18672	-67.9942	-1.91205	-109.552	0.725324	41.558	0.748285	0.663378	-1.91205	-109.552	-0.334665	-0.942337	-0.0161405	0.00426154	-0.966867	0.255279	2.88346	165.21	-0.554146	0.83242	2.15813	123.652	0.000282047	0.0167942	2.51238e+06	0.0176509	0.0176509	-0.017647	-0.017647	0.00404977	0.00404977	0.00406683
		240	0.991022	1.48255e+08	0.982124	1.00051	1.00039	-0.00919075	0.013936	2.00089	0.000120521	0.000278681	0.0166937	8.5122e-06	1.0005	1.00038	0.380018	-1.18098	-67.6652	-1.90918	-109.388	0.728195	41.7225	0.746377	0.665523	-1.90918	-109.388	-0.331958	-0.943294	-0.0161345	0.00428482	-0.966498	0.256673	2.88201	165.127	-0.550551	0.834802	2.15382	123.405	0.000282023	0.0167935	2.51228e+06	0.0176573	0.0176573	-0.0176534	-0.0176534	0.00402645	0.00402645	0.00404351
2016-03-02	61	241	0.991083	1.48264e+08	0.982245	1.00051	1.00038	-0.00913078	0.0139753	2.00089	0.000123098	0.000278681	0.0166937	8.05039e-06	1.0005	1.00038	0.388146	-1.17218	-67.1608	-1.90477	-109.135	0.732596	41.9747	0.743441	0.668802	-1.90477	-109.135	-0.327803	-0.944746	-0.0161349	0.00428315	-0.966525	0.256572	2.88212	165.133	-0.546958	0.83716	2.14952	123.159	0.000281561	0.0167798	2.51022e+06	0.0176569	0.0176569	-0.017653	-0.017653	0.00402814	0.00402814	0.0040452
		242	0.991144	1.48273e+08	0.982367	1.00051	1.00038	-0.00907048	0.0140147	2.00089	0.000126349	0.000278686	0.0166939	7.92823e-06	1.0005	1.00037	0.398396	-1.16103	-66.5221	-1.8992	-108.816	0.738171	42.2941	0.739701	0.672936	-1.8992	-108.816	-0.322532	-0.946559	-0.0161405	0.00426285	-0.966848	0.255354	2.88338	165.205	-0.543341	0.839512	2.14521	122.911	0.000281439	0.0167762	2.50968e+06	0.0176515	0.0176515	-0.0176476	-0.0176476	0.00404858	0.00404858	0.00406564
		243	0.991206	1.48282e+08	0.982489	1.00051	1.00038	-0.00901018	0.0140536	2.00089	0.000128495	0.000278686	0.0166939	8.36591e-06	1.0005	1.00037	0.405162	-1.15364	-66.0987	-1.89551	-108.604	0.741865	42.5057	0.73721	0.675664	-1.89551	-108.604	-0.319033	-0.947744	-0.0161379	0.00427257	-0.966694	0.255936	2.88278	165.171	-0.539729	0.841839	2.14091	122.665	0.000281877	0.0167892	2.51163e+06	0.0176542	0.0176542	-0.0176502	-0.0176502	0.00403882	0.00403882	0.00405588
		244	0.991267	1.48292e+08	0.982611	1.00051	1.00038	-0.00894949	0.0140924	2.00089	0.000129863	0.000278689	0.016694	8.41769e-06	1.0005	1.00037	0.409475	-1.14892	-65.8282	-1.89314	-108.469	0.744226	42.641	0.735613	0.677403	-1.89314	-108.469	-0.316794	-0.948494	-0.0161296	0.00430413	-0.966192	0.257825	2.88082	165.059	-0.536091	0.84416	2.1366	122.418	0.000281929	0.0167907	2.51186e+06	0.0176628	0.0176628	-0.0176589	-0.0176589	0.00400718	0.00400718	0.00402425
2016-03-03	62	245	0.991329	1.48301e+08	0.982733	1.00051	1.00038	-0.00888879	0.0141307	2.00089	0.000132325	0.000278686	0.0166939	7.92952e-06	1.0005	1.00037	0.417239	-1.14039	-65.3396	-1.88888	-108.225	0.748489	42.8853	0.732718	0.680533	-1.88888	-108.225	-0.312747	-0.949836	-0.0161294	0.00430467	-0.966183	0.257859	2.88079	165.057	-0.532458	0.846457	2.1323	122.172	0.000281441	0.0167762	2.50968e+06	0.0176629	0.0176629	-0.017659	-0.017659	0.0040066	0.0040066	0.00402367
		246	0.991391	1.4831e+08	0.982857	1.00051	1.00038	-0.00882778	0.0141689	2.00089	0.000135437	0.000278689	0.016694	7.76871e-06	1.0005	1.00037	0.427049	-1.12957	-64.7195	-1.88347	-107.915	0.7539	43.1953	0.729025	0.684487	-1.88347	-107.915	-0.307603	-0.951515	-0.0161341	0.00428701	-0.966465	0.2568	2.88188	165.12	-0.5288	0.848746	2.12798	121.924	0.00028128	0.0167714	2.50897e+06	0.0176582	0.0176582	-0.0176543	-0.0176543	0.00402437	0.00402437	0.00404144
		247	0.991454	1.48319e+08	0.98298	1.00051	1.00038	-0.00876676	0.0142068	2.00089	0.000137591	0.000278688	0.0166939	8.0937e-06	1.00051	1.00037	0.433843	-1.12204	-64.2883	-1.87971	-107.699	0.757664	43.4109	0.726444	0.687226	-1.87971	-107.699	-0.30402	-0.952666	-0.0161318	0.00429565	-0.966327	0.257318	2.88135	165.089	-0.525146	0.851012	2.12368	121.678	0.000281605	0.0167811	2.51041e+06	0.0176605	0.0176605	-0.0176566	-0.0176566	0.00401568	0.00401568	0.00403275
		248	0.991516	1.48329e+08	0.983104	1.00051	1.00038	-0.00870546	0.0142446	2.00089	0.00013917	0.000278692	0.0166941	8.13378e-06	1.00051	1.00037	0.438822	-1.11651	-63.9713	-1.87694	-107.541	0.76043	43.5695	0.724539	0.689233	-1.87694	-107.541	-0.301383	-0.953503	-0.0161253	0.00432065	-0.965927	0.258813	2.8798	165	-0.52147	0.85327	2.11937	121.431	0.000281645	0.0167823	2.51059e+06	0.0176674	0.0176674	-0.0176635	-0.0176635	0.00399064	0.00399064	0.00400771
2016-03-04	63	249	0.991578	1.48338e+08	0.983227	1.00052	1.00037	-0.00864415	0.0142818	2.00089	0.000141895	0.000278691	0.016694	7.60848e-06	1.00051	1.00037	0.447414	-1.10692	-63.4221	-1.87215	-107.266	0.765223	43.844	0.721228	0.692698	-1.87215	-107.266	-0.296811	-0.954936	-0.0161274	0.00431264	-0.966056	0.258334	2.8803	165.029	-0.517799	0.855502	2.11507	121.185	0.000281119	0.0167666	2.50825e+06	0.0176652	0.0176652	-0.0176613	-0.0176613	0.00399866	0.00399866	0.00401573
		250	0.991641	1.48347e+08	0.983352	1.00052	1.00037	-0.00858258	0.014319	2.00089	0.00014517	0.000278695	0.0166942	7.36102e-06	1.00051	1.00036	0.45774	-1.09534	-62.7586	-1.86636	-106.934	0.771013	44.1758	0.717205	0.696862	-1.86636	-106.934	-0.291276	-0.956639	-0.0161338	0.0042888	-0.966437	0.256904	2.88177	165.114	-0.514107	0.857726	2.11076	120.938	0.000280872	0.0167592	2.50715e+06	0.0176589	0.0176589	-0.017655	-0.017655	0.00402266	0.00402266	0.00403973
		251	0.991704	1.48357e+08	0.983476	1.00052	1.00037	-0.008521	0.0143557	2.00089	0.000147316	0.000278693	0.0166941	7.68553e-06	1.00051	1.00036	0.464508	-1.08772	-62.3216	-1.86254	-106.716	0.774826	44.3943	0.714543	0.699592	-1.86254	-106.716	-0.287626	-0.957743	-0.0161317	0.00429653	-0.966313	0.257368	2.8813	165.086	-0.51042	0.859925	2.10647	120.692	0.000281197	0.0167689	2.50859e+06	0.0176609	0.0176609	-0.017657	-0.017657	0.00401488	0.00401488	0.00403195
		252	0.991766	1.48366e+08	0.983601	1.00052	1.00037	-0.00845908	0.0143923	2.00089	0.000148786	0.000278696	0.0166942	7.67476e-06	1.00051	1.00036	0.469144	-1.08248	-62.0213	-1.85992	-106.566	0.777447	44.5444	0.712707	0.701462	-1.85992	-106.566	-0.285115	-0.958493	-0.0161245	0.0043238	-0.965877	0.259	2.87961	164.989	-0.506708	0.862118	2.10216	120.445	0.000281186	0.0167686	2.50855e+06	0.0176683	0.0176683	-0.0176645	-0.0176645	0.00398752	0.00398752	0.0040046
2016-03-05	64	253	0.991829	1.48376e+08	0.983725	1.00052	1.00037	-0.00839716	0.0144285	2.00089	0.000151226	0.000278695	0.0166942	7.18727e-06	1.00051	1.00036	0.476834	-1.07375	-61.5212	-1.85556	-106.316	0.781812	44.7945	0.709638	0.704566	-1.85556	-106.316	-0.280929	-0.959729	-0.0161248	0.00432268	-0.965895	0.258934	2.87967	164.993	-0.503	0.864286	2.09786	120.199	0.000280698	0.0167541	2.50637e+06	0.017668	0.017668	-0.0176642	-0.0176642	0.00398862	0.00398862	0.0040057
		254	0.991893	1.48385e+08	0.983851	1.00052	1.00037	-0.00833492	0.0144647	2.00089	0.000154314	0.000278699	0.0166943	7.0273e-06	1.00051	1.00036	0.486573	-1.06263	-60.8844	-1.85	-105.997	0.787368	45.1129	0.705712	0.708499	-1.85	-105.997	-0.275592	-0.961275	-0.0161303	0.00430265	-0.966216	0.257732	2.88092	165.064	-0.499268	0.866448	2.09355	119.952	0.000280538	0.0167493	2.50566e+06	0.0176627	0.0176627	-0.0176588	-0.0176588	0.00400882	0.00400882	0.00402589
		255	0.991956	1.48395e+08	0.983977	1.00052	1.00037	-0.00827268	0.0145004	2.00089	0.000156349	0.000278698	0.0166942	7.40226e-06	1.00052	1.00036	0.492988	-1.05528	-60.4628	-1.84632	-105.786	0.791047	45.3237	0.703101	0.71109	-1.84632	-105.786	-0.272053	-0.962282	-0.0161276	0.0043126	-0.966057	0.258329	2.8803	165.029	-0.495541	0.868585	2.08925	119.705	0.000280913	0.0167605	2.50733e+06	0.0176654	0.0176654	-0.0176615	-0.0176615	0.0039988	0.0039988	0.00401587
		256	0.99202	1.48404e+08	0.984103	1.00052	1.00037	-0.00821011	0.014536	2.00089	0.000157733	0.000278702	0.0166944	7.45463e-06	1.00052	1.00036	0.497353	-1.05025	-60.175	-1.84381	-105.643	0.793559	45.4676	0.701313	0.712854	-1.84381	-105.643	-0.269636	-0.962962	-0.0161199	0.00434169	-0.96559	0.260069	2.8785	164.926	-0.491789	0.870714	2.08494	119.458	0.000280966	0.016762	2.50756e+06	0.0176733	0.0176733	-0.0176695	-0.0176695	0.00396962	0.00396962	0.0039867
2016-03-06	65	257	0.992083	1.48414e+08	0.984229	1.00052	1.00036	-0.00814754	0.0145711	2.00089	0.000160213	0.0002787	0.0166943	6.96681e-06	1.00052	1.00036	0.505173	-1.04121	-59.6572	-1.83929	-105.384	0.798078	45.7265	0.698084	0.716016	-1.83929	-105.384	-0.265281	-0.964171	-0.0161208	0.00433811	-0.965648	0.259855	2.87872	164.939	-0.488043	0.87282	2.08064	119.212	0.000280478	0.0167475	2.50539e+06	0.0176723	0.0176723	-0.0176685	-0.0176685	0.0039732	0.0039732	0.00399028
		258	0.992147	1.48423e+08	0.984356	1.00053	1.00036	-0.00808468	0.0146062	2.00089	0.000163269	0.000278704	0.0166944	6.76938e-06	1.00052	1.00036	0.514809	-1.03001	-59.0153	-1.83369	-105.063	0.803679	46.0474	0.694063	0.719915	-1.83369	-105.063	-0.259877	-0.965642	-0.0161265	0.00431736	-0.965982	0.258611	2.88001	165.012	-0.484274	0.874916	2.07633	118.965	0.00028028	0.0167416	2.5045e+06	0.0176669	0.0176669	-0.017663	-0.017663	0.00399411	0.00399411	0.00401119
		259	0.992211	1.48433e+08	0.984483	1.00053	1.00036	-0.00802183	0.0146408	2.00089	0.000165271	0.000278703	0.0166944	7.10682e-06	1.00052	1.00035	0.521122	-1.02263	-58.5925	-1.83	-104.851	0.807369	46.2588	0.691402	0.722471	-1.83	-104.851	-0.256312	-0.966594	-0.0161239	0.00432714	-0.965824	0.259197	2.8794	164.978	-0.48051	0.876989	2.07203	118.719	0.000280618	0.0167517	2.50601e+06	0.0176695	0.0176695	-0.0176656	-0.0176656	0.00398427	0.00398427	0.00400134
		260	0.992275	1.48442e+08	0.98461	1.00053	1.00036	-0.00795866	0.0146754	2.00089	0.000166649	0.000278707	0.0166945	7.13434e-06	1.00052	1.00035	0.525465	-1.01753	-58.3004	-1.82745	-104.705	0.809918	46.4049	0.689558	0.72423	-1.82745	-104.705	-0.253847	-0.967244	-0.0161163	0.00435563	-0.965365	0.260902	2.87764	164.876	-0.476722	0.879054	2.06772	118.472	0.000280645	0.0167525	2.50613e+06	0.0176772	0.0176772	-0.0176734	-0.0176734	0.00395568	0.00395568	0.00397276
2016-03-07	66	261	0.992339	1.48452e+08	0.984737	1.00053	1.00036	-0.00789549	0.0147094	2.00089	0.000169072	0.000278707	0.0166945	6.64697e-06	1.00052	1.00035	0.533106	-1.00853	-57.7845	-1.82295	-104.447	0.814421	46.6629	0.68629	0.727328	-1.82295	-104.447	-0.24949	-0.968377	-0.0161172	0.00435234	-0.965419	0.260705	2.87784	164.888	-0.472939	0.881095	2.06342	118.225	0.000280158	0.0167379	2.50396e+06	0.0176763	0.0176763	-0.0176725	-0.0176725	0.00395898	0.00395898	0.00397606
		262	0.992404	1.48461e+08	0.984865	1.00053	1.00036	-0.00783204	0.0147435	2.00089	0.000172047	0.000278712	0.0166947	6.43767e-06	1.00052	1.00035	0.542486	-0.997403	-57.147	-1.81739	-104.129	0.819983	46.9816	0.682233	0.731134	-1.81739	-104.129	-0.244099	-0.96975	-0.0161228	0.00433223	-0.965744	0.259498	2.87909	164.96	-0.469135	0.883127	2.05911	117.978	0.000279949	0.0167317	2.50302e+06	0.0176711	0.0176711	-0.0176672	-0.0176672	0.00397928	0.00397928	0.00399636
		263	0.992468	1.48471e+08	0.984993	1.00053	1.00036	-0.0077686	0.014777	2.00089	0.000173894	0.000278711	0.0166946	6.8001e-06	1.00052	1.00035	0.54831	-0.990454	-56.7488	-1.81391	-103.929	0.823458	47.1807	0.679689	0.733501	-1.81391	-103.929	-0.240728	-0.970593	-0.0161192	0.00434549	-0.96553	0.260292	2.87827	164.913	-0.465335	0.885135	2.05481	117.732	0.000280311	0.0167425	2.50464e+06	0.0176746	0.0176746	-0.0176708	-0.0176708	0.00396594	0.00396594	0.00398302
		264	0.992533	1.48481e+08	0.985122	1.00053	1.00036	-0.00770489	0.0148105	2.00089	0.000175218	0.000278716	0.0166948	6.9031e-06	1.00052	1.00035	0.552485	-0.985454	-56.4623	-1.81141	-103.786	0.825958	47.3239	0.677853	0.735198	-1.81141	-103.786	-0.2383	-0.971191	-0.0161114	0.00437471	-0.965057	0.262041	2.87646	164.809	-0.461515	0.887132	2.0505	117.485	0.000280414	0.0167456	2.5051e+06	0.0176826	0.0176826	-0.0176788	-0.0176788	0.0039366	0.0039366	0.00395369
2016-03-08	67	265	0.992598	1.4849e+08	0.98525	1.00053	1.00035	-0.00764118	0.0148434	2.00089	0.000177689	0.000278714	0.0166947	6.44038e-06	1.00053	1.00035	0.560278	-0.976074	-55.9249	-1.80672	-103.518	0.830648	47.5926	0.674398	0.738368	-1.80672	-103.518	-0.233743	-0.972298	-0.0161131	0.00436835	-0.96516	0.26166	2.87685	164.831	-0.4577	0.889107	2.0462	117.239	0.000279951	0.0167317	2.50303e+06	0.0176809	0.0176809	-0.017677	-0.017677	0.00394298	0.00394298	0.00396007
		266	0.992663	1.485e+08	0.985379	1.00053	1.00035	-0.00757722	0.0148763	2.00089	0.000180688	0.000278719	0.0166949	6.24339e-06	1.00053	1.00035	0.569734	-0.964614	-55.2683	-1.80099	-103.189	0.836378	47.9209	0.670156	0.742221	-1.80099	-103.189	-0.228168	-0.973622	-0.0161194	0.00434549	-0.965531	0.260289	2.87827	164.913	-0.453864	0.891071	2.04189	116.992	0.000279754	0.0167259	2.50215e+06	0.0176749	0.0176749	-0.017671	-0.017671	0.00396606	0.00396606	0.00398314
		267	0.992728	1.4851e+08	0.985508	1.00053	1.00035	-0.00751325	0.0149087	2.00089	0.00018256	0.000278718	0.0166948	6.61804e-06	1.00053	1.00035	0.575636	-0.957415	-54.8558	-1.79739	-102.983	0.839978	48.1272	0.66748	0.744628	-1.79739	-102.983	-0.224662	-0.974437	-0.0161164	0.00435666	-0.96535	0.260959	2.87758	164.873	-0.450034	0.893011	2.0376	116.746	0.000280129	0.0167371	2.50383e+06	0.0176778	0.0176778	-0.017674	-0.017674	0.00395479	0.00395479	0.00397188
		268	0.992793	1.4852e+08	0.985638	1.00054	1.00035	-0.007449	0.014941	2.00089	0.000183884	0.000278722	0.016695	6.72072e-06	1.00053	1.00034	0.579809	-0.952302	-54.5629	-1.79484	-102.837	0.842534	48.2737	0.665574	0.746332	-1.79484	-102.837	-0.22217	-0.975008	-0.0161088	0.00438493	-0.964891	0.26265	2.87583	164.773	-0.446182	0.894942	2.03329	116.499	0.000280232	0.0167401	2.50429e+06	0.0176855	0.0176855	-0.0176817	-0.0176817	0.0039264	0.0039264	0.0039435
2016-03-09	68	269	0.992858	1.48529e+08	0.985767	1.00054	1.00035	-0.00738475	0.0149728	2.00089	0.00018633	0.00027872	0.0166949	6.27031e-06	1.00053	1.00034	0.587523	-0.942802	-54.0186	-1.79009	-102.564	0.847284	48.5458	0.662021	0.749485	-1.79009	-102.564	-0.217536	-0.976052	-0.0161108	0.00437757	-0.965011	0.26221	2.87628	164.799	-0.442335	0.89685	2.029	116.253	0.000279781	0.0167267	2.50227e+06	0.0176835	0.0176835	-0.0176797	-0.0176797	0.00393379	0.00393379	0.00395088
		270	0.992924	1.48539e+08	0.985897	1.00054	1.00035	-0.00732025	0.0150046	2.00089	0.000189304	0.000278725	0.0166951	6.08567e-06	1.00053	1.00034	0.5969	-0.931164	-53.3518	-1.78427	-102.231	0.853103	48.8792	0.657649	0.753325	-1.78427	-102.231	-0.211853	-0.977301	-0.0161175	0.00435325	-0.965406	0.260751	2.87779	164.885	-0.438468	0.898747	2.02469	116.006	0.000279597	0.0167211	2.50145e+06	0.0176771	0.0176771	-0.0176733	-0.0176733	0.00395833	0.00395833	0.00397541
		271	0.992989	1.48549e+08	0.986027	1.00054	1.00035	-0.00725574	0.0150359	2.00089	0.000191176	0.000278723	0.016695	6.46029e-06	1.00053	1.00034	0.602803	-0.923787	-52.9291	-1.78058	-102.02	0.856791	49.0905	0.654866	0.755745	-1.78058	-102.02	-0.208247	-0.978076	-0.0161148	0.00436298	-0.965248	0.261335	2.87719	164.851	-0.434606	0.900621	2.0204	115.76	0.000279971	0.0167323	2.50312e+06	0.0176797	0.0176797	-0.0176759	-0.0176759	0.00394851	0.00394851	0.0039656
		272	0.993055	1.48559e+08	0.986158	1.00054	1.00035	-0.00719089	0.0150671	2.00089	0.000192374	0.000278727	0.0166951	6.50004e-06	1.00053	1.00034	0.606581	-0.919043	-52.6573	-1.77821	-101.884	0.859164	49.2264	0.653071	0.757297	-1.77821	-101.884	-0.205926	-0.978568	-0.0161064	0.00439425	-0.96474	0.263206	2.87525	164.74	-0.430718	0.902486	2.01609	115.513	0.000280011	0.0167335	2.5033e+06	0.0176881	0.0176881	-0.0176843	-0.0176843	0.00391708	0.00391708	0.00393417
2016-03-10	69	273	0.99312	1.48569e+08	0.986288	1.00054	1.00035	-0.00712604	0.0150978	2.00089	0.00019462	0.000278725	0.0166951	6.02471e-06	1.00053	1.00034	0.613661	-0.910107	-52.1453	-1.77374	-101.628	0.863631	49.4824	0.649681	0.760207	-1.77374	-101.628	-0.201552	-0.979478	-0.0161071	0.0043915	-0.964784	0.263042	2.87542	164.749	-0.426836	0.904329	2.01179	115.267	0.000279536	0.0167193	2.50117e+06	0.0176873	0.0176873	-0.0176835	-0.0176835	0.00391982	0.00391982	0.00393692
		274	0.993187	1.48579e+08	0.98642	1.00054	1.00034	-0.00706093	0.0151285	2.00089	0.000197393	0.00027873	0.0166952	5.81523e-06	1.00054	1.00034	0.622406	-0.898984	-51.508	-1.76818	-101.309	0.869193	49.8011	0.645443	0.763808	-1.76818	-101.309	-0.196101	-0.980584	-0.0161127	0.00437141	-0.965112	0.261836	2.87667	164.821	-0.422932	0.906161	2.00747	115.02	0.000279326	0.0167131	2.50024e+06	0.0176821	0.0176821	-0.0176783	-0.0176783	0.00394013	0.00394013	0.00395722
		275	0.993253	1.48588e+08	0.986551	1.00054	1.00034	-0.00699583	0.0151587	2.00089	0.00019904	0.000278728	0.0166951	6.17726e-06	1.00054	1.00034	0.6276	-0.89233	-51.1267	-1.76485	-101.118	0.87252	49.9917	0.642898	0.765951	-1.76485	-101.118	-0.192838	-0.981231	-0.0161084	0.00438704	-0.964858	0.262773	2.8757	164.765	-0.419034	0.907971	2.00318	114.774	0.000279688	0.0167239	2.50186e+06	0.0176862	0.0176862	-0.0176824	-0.0176824	0.00392436	0.00392436	0.00394146
		276	0.993319	1.48598e+08	0.986682	1.00054	1.00034	-0.00693049	0.0151889	2.00089	0.000200241	0.000278733	0.0166953	6.31782e-06	1.00054	1.00034	0.631386	-0.887458	-50.8476	-1.76241	-100.979	0.874956	50.1313	0.64103	0.767515	-1.76241	-100.979	-0.190447	-0.981697	-0.0161003	0.00441726	-0.964363	0.264581	2.87382	164.658	-0.415116	0.909768	1.99887	114.527	0.000279829	0.0167281	2.50249e+06	0.0176944	0.0176944	-0.0176906	-0.0176906	0.00389399	0.00389399	0.00391109
2016-03-11	70	277	0.993385	1.48608e+08	0.986814	1.00054	1.00034	-0.00686516	0.0152184	2.00089	0.00020259	0.000278731	0.0166952	5.89247e-06	1.00054	1.00034	0.638794	-0.877866	-50.298	-1.75762	-100.704	0.879752	50.4061	0.637342	0.770581	-1.75762	-100.704	-0.185737	-0.982599	-0.0161025	0.0044092	-0.964496	0.264099	2.87432	164.687	-0.411204	0.911543	1.99457	114.281	0.000279403	0.0167154	2.50058e+06	0.0176922	0.0176922	-0.0176884	-0.0176884	0.00390209	0.00390209	0.00391919
		278	0.993452	1.48618e+08	0.986946	1.00055	1.00034	-0.00679961	0.015248	2.00089	0.000205369	0.000278737	0.0166954	5.68337e-06	1.00054	1.00033	0.647555	-0.866424	-49.6425	-1.7519	-100.376	0.885473	50.7339	0.632924	0.774214	-1.7519	-100.376	-0.180113	-0.983646	-0.0161089	0.00438648	-0.964868	0.262735	2.87574	164.768	-0.407274	0.913306	1.99026	114.034	0.000279194	0.0167091	2.49965e+06	0.0176863	0.0176863	-0.0176825	-0.0176825	0.00392507	0.00392507	0.00394216
		279	0.993518	1.48628e+08	0.987078	1.00055	1.00034	-0.00673406	0.015277	2.00089	0.000207046	0.000278736	0.0166954	6.03339e-06	1.00054	1.00033	0.652845	-0.859462	-49.2436	-1.74842	-100.177	0.888954	50.9333	0.630225	0.776413	-1.74842	-100.177	-0.176687	-0.984267	-0.0161053	0.00439956	-0.964654	0.26352	2.87492	164.721	-0.403349	0.915046	1.98597	113.788	0.000279544	0.0167196	2.50121e+06	0.0176898	0.0176898	-0.017686	-0.017686	0.00391187	0.00391187	0.00392897
		280	0.993585	1.48638e+08	0.987211	1.00055	1.00034	-0.00666825	0.0153061	2.00089	0.000208202	0.000278742	0.0166956	6.12423e-06	1.00054	1.00033	0.656489	-0.854641	-48.9673	-1.74601	-100.039	0.891364	51.0714	0.628351	0.77793	-1.74601	-100.039	-0.174314	-0.98469	-0.0160971	0.00443016	-0.964152	0.26535	2.87303	164.612	-0.399403	0.916776	1.98166	113.541	0.000279635	0.0167223	2.50162e+06	0.017698	0.017698	-0.0176943	-0.0176943	0.00388111	0.00388111	0.00389821
2016-03-12	71	281	0.993651	1.48648e+08	0.987343	1.00055	1.00034	-0.00660244	0.0153346	2.00089	0.000210431	0.000278741	0.0166955	5.68716e-06	1.00054	1.00033	0.663517	-0.845286	-48.4313	-1.74133	-99.7707	0.896042	51.3394	0.624706	0.78086	-1.74133	-99.7707	-0.169706	-0.985495	-0.0160987	0.00442401	-0.964254	0.264981	2.87341	164.634	-0.395461	0.918483	1.97737	113.295	0.000279198	0.0167092	2.49966e+06	0.0176964	0.0176964	-0.0176926	-0.0176926	0.00388731	0.00388731	0.00390441
		282	0.993718	1.48658e+08	0.987476	1.00055	1.00034	-0.00653635	0.0153631	2.00088	0.000213214	0.000278748	0.0166957	5.52851e-06	1.00054	1.00033	0.672291	-0.833497	-47.7559	-1.73543	-99.433	0.901936	51.6771	0.620092	0.784529	-1.73543	-99.433	-0.163895	-0.986478	-0.0161059	0.00439855	-0.964672	0.263454	2.87499	164.725	-0.391498	0.920179	1.97306	113.048	0.00027904	0.0167045	2.49895e+06	0.0176899	0.0176899	-0.0176861	-0.0176861	0.00391306	0.00391306	0.00393016
		283	0.993786	1.48668e+08	0.98761	1.00055	1.00034	-0.00647027	0.015391	2.00089	0.000214797	0.000278746	0.0166957	5.97815e-06	1.00054	1.00033	0.677284	-0.826732	-47.3683	-1.73205	-99.2392	0.905319	51.871	0.617435	0.786622	-1.73205	-99.2392	-0.160557	-0.987027	-0.0161018	0.00441326	-0.964431	0.264335	2.87408	164.673	-0.387541	0.921852	1.96876	112.802	0.000279489	0.0167179	2.50097e+06	0.0176937	0.0176937	-0.0176899	-0.0176899	0.00389822	0.00389822	0.00391532
		284	0.993853	1.48678e+08	0.987743	1.00055	1.00034	-0.00640391	0.0154189	2.00089	0.000215834	0.000278751	0.0166958	6.1561e-06	1.00054	1.00033	0.680553	-0.822279	-47.1131	-1.72982	-99.1116	0.907545	51.9985	0.615682	0.787995	-1.72982	-99.1116	-0.158359	-0.987382	-0.0160927	0.00444686	-0.963878	0.266345	2.87199	164.553	-0.383563	0.923515	1.96445	112.555	0.000279667	0.0167233	2.50176e+06	0.0177027	0.0177027	-0.017699	-0.017699	0.0038644	0.0038644	0.00388151
2016-03-13	72	285	0.99392	1.48688e+08	0.987877	1.00055	1.00033	-0.00633755	0.0154462	2.00089	0.000218021	0.000278749	0.0166958	5.76802e-06	1.00055	1.00033	0.687448	-0.812828	-46.5716	-1.7251	-98.8409	0.912271	52.2693	0.611951	0.790896	-1.7251	-98.8409	-0.153691	-0.988119	-0.0160946	0.00443996	-0.963991	0.265933	2.87242	164.578	-0.37959	0.925155	1.96015	112.308	0.000279279	0.0167116	2.50003e+06	0.0177008	0.0177008	-0.0176971	-0.0176971	0.00387133	0.00387133	0.00388843
		286	0.993987	1.48698e+08	0.988011	1.00055	1.00033	-0.00627098	0.0154735	2.00088	0.000220612	0.000278754	0.0166959	5.58389e-06	1.00055	1.00033	0.695619	-0.801515	-45.9234	-1.71944	-98.5168	0.917927	52.5934	0.607468	0.794344	-1.71944	-98.5168	-0.148099	-0.988972	-0.0161007	0.00441833	-0.964349	0.264635	2.87377	164.655	-0.375599	0.926782	1.95584	112.061	0.000279095	0.0167061	2.4992e+06	0.0176953	0.0176953	-0.0176915	-0.0176915	0.00389323	0.00389323	0.00391033
		287	0.994055	1.48708e+08	0.988145	1.00055	1.00033	-0.00620442	0.0155003	2.00089	0.000222103	0.000278753	0.0166959	5.95874e-06	1.00055	1.00033	0.700321	-0.794949	-45.5472	-1.71616	-98.3287	0.92121	52.7815	0.604857	0.796334	-1.71616	-98.3287	-0.144852	-0.989453	-0.0160962	0.00443464	-0.96408	0.265613	2.87275	164.597	-0.371614	0.928387	1.95154	111.815	0.00027947	0.0167173	2.50088e+06	0.0176995	0.0176995	-0.0176958	-0.0176958	0.00387676	0.00387676	0.00389387
		288	0.994122	1.48719e+08	0.988279	1.00055	1.00033	-0.00613765	0.015527	2.00089	0.000223174	0.000278759	0.0166961	6.12488e-06	1.00055	1.00033	0.703698	-0.790207	-45.2755	-1.71379	-98.1929	0.923581	52.9173	0.602967	0.797766	-1.71379	-98.1929	-0.142506	-0.989794	-0.0160877	0.00446588	-0.963563	0.26748	2.87082	164.486	-0.36761	0.92998	1.94723	111.568	0.000279636	0.0167223	2.50162e+06	0.0177079	0.0177079	-0.0177042	-0.0177042	0.00384533	0.00384533	0.00386244
2016-03-14	73	289	0.99419	1.48729e+08	0.988414	1.00056	1.00033	-0.00607087	0.0155532	2.00089	0.000225421	0.000278758	0.016696	5.71223e-06	1.00055	1.00032	0.710781	-0.780188	-44.7015	-1.70878	-97.9058	0.928591	53.2043	0.598963	0.800777	-1.70878	-97.9058	-0.137545	-0.990495	-0.0160909	0.00445438	-0.963754	0.266793	2.87153	164.526	-0.363612	0.931551	1.94294	111.322	0.000279223	0.01671	2.49978e+06	0.0177049	0.0177049	-0.0177011	-0.0177011	0.00385691	0.00385691	0.00387402
		290	0.994258	1.48739e+08	0.988549	1.00056	1.00033	-0.00600389	0.0155794	2.00088	0.000228097	0.000278764	0.0166962	5.516e-06	1.00055	1.00032	0.71922	-0.768117	-44.0098	-1.70274	-97.56	0.934627	53.5502	0.594119	0.804377	-1.70274	-97.56	-0.131564	-0.991308	-0.0160987	0.00442662	-0.964214	0.265127	2.87326	164.626	-0.359595	0.933108	1.93863	111.075	0.000279027	0.0167041	2.4989e+06	0.0176978	0.0176978	-0.017694	-0.017694	0.00388502	0.00388502	0.00390212
		291	0.994326	1.48749e+08	0.988684	1.00056	1.00033	-0.0059369	0.015605	2.00089	0.0002296	0.000278762	0.0166962	5.91561e-06	1.00055	1.00032	0.723959	-0.761272	-43.6177	-1.69932	-97.3639	0.938049	53.7462	0.591363	0.806406	-1.69932	-97.3639	-0.128171	-0.991752	-0.0160948	0.00444065	-0.963982	0.265968	2.87238	164.575	-0.355584	0.934644	1.93434	110.829	0.000279427	0.0167161	2.50069e+06	0.0177014	0.0177014	-0.0176977	-0.0176977	0.00387083	0.00387083	0.00388794
		292	0.994394	1.48759e+08	0.988819	1.00056	1.00033	-0.00586966	0.0156306	2.00089	0.000230607	0.000278768	0.0166963	6.06883e-06	1.00055	1.00032	0.727135	-0.756657	-43.3532	-1.69701	-97.2317	0.940357	53.8785	0.5895	0.807768	-1.69701	-97.2317	-0.125882	-0.992045	-0.0160861	0.0044729	-0.963448	0.267897	2.87038	164.461	-0.351554	0.936168	1.93003	110.582	0.00027958	0.0167206	2.50137e+06	0.01771	0.01771	-0.0177063	-0.0177063	0.00383837	0.00383837	0.00385548
2016-03-15	74	293	0.994462	1.48769e+08	0.988954	1.00056	1.00033	-0.00580242	0.0156556	2.00089	0.000232689	0.000278767	0.0166963	5.69398e-06	1.00055	1.00032	0.733698	-0.747047	-42.8026	-1.69221	-96.9564	0.945161	54.1538	0.585612	0.810591	-1.69221	-96.9564	-0.121114	-0.992639	-0.0160883	0.00446473	-0.963583	0.267408	2.87089	164.49	-0.347527	0.93767	1.92573	110.336	0.000279205	0.0167094	2.49969e+06	0.0177078	0.0177078	-0.0177041	-0.0177041	0.0038466	0.0038466	0.00386371
		294	0.99453	1.4878e+08	0.98909	1.00056	1.00032	-0.00573497	0.0156807	2.00088	0.000235201	0.000278774	0.0166965	5.53563e-06	1.00055	1.00032	0.741619	-0.735315	-42.1305	-1.68634	-96.6203	0.951027	54.4898	0.580847	0.814013	-1.68634	-96.6203	-0.115289	-0.993332	-0.0160954	0.00443975	-0.963998	0.265908	2.87245	164.579	-0.343483	0.939159	1.92142	110.089	0.000279047	0.0167047	2.49899e+06	0.0177015	0.0177015	-0.0176978	-0.0176978	0.00387193	0.00387193	0.00388903
		295	0.994598	1.4879e+08	0.989226	1.00056	1.00032	-0.00566752	0.0157052	2.00089	0.000236539	0.000278773	0.0166965	5.97305e-06	1.00056	1.00032	0.74584	-0.729001	-41.7687	-1.68319	-96.4394	0.954184	54.6707	0.578274	0.815842	-1.68319	-96.4394	-0.112153	-0.993691	-0.0160903	0.00445809	-0.963694	0.267007	2.87131	164.514	-0.339444	0.940626	1.91712	109.843	0.000279484	0.0167178	2.50094e+06	0.0177063	0.0177063	-0.0177025	-0.0177025	0.0038534	0.0038534	0.00387051
		296	0.994667	1.488e+08	0.989362	1.00056	1.00032	-0.00559983	0.0157296	2.00089	0.000237408	0.000278779	0.0166967	6.17672e-06	1.00056	1.00032	0.748579	-0.724879	-41.5325	-1.68112	-96.3213	0.956245	54.7888	0.576592	0.817032	-1.68112	-96.3213	-0.110105	-0.99392	-0.0160804	0.00449433	-0.963091	0.269175	2.86906	164.385	-0.335386	0.942081	1.91281	109.596	0.000279688	0.0167239	2.50185e+06	0.0177159	0.0177159	-0.0177122	-0.0177122	0.00381689	0.00381689	0.00383401
2016-03-16	75	297	0.994735	1.4881e+08	0.989498	1.00056	1.00032	-0.00553215	0.0157535	2.00089	0.000239529	0.000278777	0.0166966	5.76341e-06	1.00056	1.00032	0.755267	-0.714734	-40.9513	-1.67605	-96.0307	0.961318	55.0795	0.57244	0.819947	-1.67605	-96.0307	-0.105062	-0.994466	-0.0160838	0.00448185	-0.963299	0.268429	2.86983	164.429	-0.331334	0.943514	1.90851	109.35	0.000279274	0.0167115	2.50001e+06	0.0177126	0.0177126	-0.0177089	-0.0177089	0.00382945	0.00382945	0.00384657
		298	0.994804	1.48821e+08	0.989635	1.00056	1.00032	-0.00546428	0.0157773	2.00088	0.000242006	0.000278782	0.0166968	5.52933e-06	1.00056	1.00032	0.763079	-0.702733	-40.2636	-1.67005	-95.6869	0.967318	55.4233	0.56751	0.823367	-1.67005	-95.6869	-0.0990924	-0.995078	-0.0160916	0.00445467	-0.963752	0.266798	2.87152	164.526	-0.327266	0.944932	1.9042	109.103	0.00027904	0.0167045	2.49896e+06	0.0177057	0.0177057	-0.0177019	-0.0177019	0.00385699	0.00385699	0.0038741
		299	0.994873	1.48831e+08	0.989772	1.00056	1.00032	-0.00539642	0.0158006	2.00089	0.000243335	0.00027878	0.0166967	5.87867e-06	1.00056	1.00032	0.767269	-0.696225	-39.8908	-1.6668	-95.5005	0.970572	55.6097	0.564827	0.825209	-1.6668	-95.5005	-0.0958538	-0.995395	-0.0160868	0.00447143	-0.963474	0.267803	2.87048	164.466	-0.323203	0.94633	1.89991	108.857	0.00027939	0.016715	2.50052e+06	0.01771	0.01771	-0.0177062	-0.0177062	0.00384003	0.00384003	0.00385715
		300	0.994941	1.48841e+08	0.989908	1.00057	1.00032	-0.00532835	0.0158239	2.00089	0.00024427	0.000278786	0.0166969	6.03204e-06	1.00056	1.00031	0.770216	-0.691617	-39.6267	-1.66449	-95.3684	0.972877	55.7417	0.562924	0.826508	-1.66449	-95.3684	-0.09356	-0.995614	-0.016078	0.0045037	-0.962935	0.269733	2.86848	164.352	-0.319123	0.947713	1.8956	108.61	0.000279543	0.0167195	2.50121e+06	0.0177185	0.0177185	-0.0177148	-0.0177148	0.00380751	0.00380751	0.00382463
2016-03-17	76	301	0.99501	1.48851e+08	0.990045	1.00057	1.00032	-0.00526029	0.0158466	2.00089	0.00024628	0.000278785	0.0166969	5.65724e-06	1.00056	1.00031	0.776552	-0.681621	-39.054	-1.6595	-95.0821	0.977875	56.0281	0.558786	0.829312	-1.6595	-95.0821	-0.0885829	-0.996069	-0.0160811	0.00449244	-0.963124	0.269059	2.86918	164.392	-0.315047	0.949076	1.8913	108.364	0.000279168	0.0167083	2.49953e+06	0.0177156	0.0177156	-0.0177119	-0.0177119	0.00381888	0.00381888	0.003836
		302	0.995079	1.48862e+08	0.990183	1.00057	1.00032	-0.00519204	0.0158693	2.00088	0.000248671	0.000278793	0.0166971	5.47417e-06	1.00056	1.00031	0.784092	-0.669565	-38.3633	-1.65347	-94.7367	0.983902	56.3735	0.553777	0.832665	-1.65347	-94.7367	-0.0825772	-0.996585	-0.0160891	0.00446485	-0.963585	0.267403	2.8709	164.49	-0.310955	0.950425	1.88699	108.117	0.000278985	0.0167028	2.49871e+06	0.0177086	0.0177086	-0.0177049	-0.0177049	0.00384687	0.00384687	0.00386398
		303	0.995148	1.48872e+08	0.99032	1.00057	1.00032	-0.00512379	0.0158915	2.00089	0.000249889	0.000278792	0.0166971	5.88676e-06	1.00056	1.00031	0.787933	-0.663352	-38.0072	-1.65036	-94.5587	0.987009	56.5515	0.551188	0.834381	-1.65036	-94.5587	-0.0794805	-0.996836	-0.0160837	0.00448399	-0.963266	0.26855	2.86971	164.422	-0.306868	0.951752	1.8827	107.871	0.000279398	0.0167152	2.50056e+06	0.0177136	0.0177136	-0.0177099	-0.0177099	0.00382752	0.00382752	0.00384464
		304	0.995217	1.48882e+08	0.990458	1.00057	1.00032	-0.00505532	0.0159136	2.00089	0.000250688	0.000278799	0.0166973	6.09086e-06	1.00056	1.00031	0.790453	-0.659248	-37.7721	-1.64831	-94.4411	0.989061	56.669	0.549474	0.835511	-1.64831	-94.4411	-0.0774348	-0.996997	-0.0160738	0.00452035	-0.962657	0.270724	2.86745	164.293	-0.302763	0.953066	1.87839	107.624	0.000279602	0.0167213	2.50147e+06	0.0177232	0.0177232	-0.0177195	-0.0177195	0.00379088	0.00379088	0.00380801
2016-03-18	77	305	0.995286	1.48893e+08	0.990595	1.00057	1.00032	-0.00498686	0.0159351	2.00089	0.000252715	0.000278798	0.0166972	5.69057e-06	1.00056	1.00031	0.796844	-0.648742	-37.1702	-1.64306	-94.1402	0.994314	56.97	0.545078	0.838385	-1.64306	-94.1402	-0.0721968	-0.99739	-0.016078	0.00450499	-0.962915	0.269805	2.8684	164.347	-0.298664	0.954358	1.87409	107.377	0.000279202	0.0167093	2.49968e+06	0.0177192	0.0177192	-0.0177155	-0.0177155	0.00380638	0.00380638	0.00382351
		306	0.995356	1.48903e+08	0.990733	1.00057	1.00031	-0.00491823	0.0159567	2.00088	0.000255074	0.000278805	0.0166974	5.45717e-06	1.00056	1.00031	0.804282	-0.63633	-36.459	-1.63685	-93.7846	1.00052	57.3256	0.539865	0.841752	-1.63685	-93.7846	-0.0660055	-0.997819	-0.0160867	0.00447452	-0.963426	0.267976	2.8703	164.456	-0.29455	0.955636	1.86978	107.131	0.000278968	0.0167023	2.49863e+06	0.0177115	0.0177115	-0.0177078	-0.0177078	0.00383728	0.00383728	0.0038544
		307	0.995425	1.48914e+08	0.990872	1.00057	1.00031	-0.0048496	0.0159776	2.00089	0.000256187	0.000278802	0.0166974	5.85627e-06	1.00056	1.00031	0.807791	-0.630402	-36.1194	-1.63389	-93.6148	1.00348	57.4954	0.537367	0.843348	-1.63389	-93.6148	-0.0630479	-0.998011	-0.0160807	0.00449593	-0.963068	0.26926	2.86897	164.38	-0.290441	0.956893	1.86548	106.884	0.000279367	0.0167143	2.50042e+06	0.017717	0.017717	-0.0177133	-0.0177133	0.00381561	0.00381561	0.00383273
		308	0.995495	1.48924e+08	0.99101	1.00057	1.00031	-0.00478079	0.0159985	2.00089	0.000256931	0.000278808	0.0166975	6.07208e-06	1.00057	1.00031	0.810137	-0.62641	-35.8906	-1.63189	-93.5004	1.00548	57.6098	0.535683	0.844419	-1.63189	-93.5004	-0.0610556	-0.998134	-0.0160704	0.00453313	-0.962443	0.271485	2.86666	164.247	-0.286317	0.958135	1.86118	106.638	0.000279583	0.0167207	2.50139e+06	0.0177267	0.0177267	-0.0177231	-0.0177231	0.00377807	0.00377807	0.0037952
2016-03-19	78	309	0.995564	1.48934e+08	0.991148	1.00057	1.00031	-0.00471197	0.0160188	2.00089	0.000258827	0.000278806	0.0166975	5.72153e-06	1.00057	1.00031	0.816116	-0.616139	-35.3022	-1.62675	-93.2062	1.01062	57.904	0.53134	0.847159	-1.62675	-93.2062	-0.0559292	-0.998435	-0.0160741	0.00451965	-0.96267	0.270679	2.86749	164.295	-0.282197	0.959357	1.85688	106.391	0.000279233	0.0167103	2.49982e+06	0.0177232	0.0177232	-0.0177195	-0.0177195	0.00379168	0.00379168	0.00380881
		310	0.995634	1.48945e+08	0.991287	1.00057	1.00031	-0.004643	0.0160392	2.00088	0.00026103	0.000278812	0.0166977	5.52547e-06	1.00057	1.00031	0.823063	-0.604014	-34.6074	-1.62069	-92.8588	1.01668	58.2514	0.526194	0.850365	-1.62069	-92.8588	-0.0498747	-0.998755	-0.0160823	0.00449146	-0.963144	0.268987	2.86925	164.396	-0.278063	0.960563	1.85257	106.145	0.000279036	0.0167044	2.49894e+06	0.0177161	0.0177161	-0.0177124	-0.0177124	0.00382028	0.00382028	0.0038374
		311	0.995704	1.48955e+08	0.991426	1.00057	1.00031	-0.00457404	0.0160589	2.00089	0.000262111	0.000278811	0.0166976	5.90036e-06	1.00057	1.00031	0.826469	-0.597989	-34.2623	-1.61768	-92.6862	1.01969	58.424	0.52363	0.851946	-1.61768	-92.6862	-0.0468661	-0.998901	-0.0160764	0.0045121	-0.962798	0.270224	2.86797	164.322	-0.273933	0.961749	1.84828	105.898	0.000279411	0.0167156	2.50062e+06	0.0177214	0.0177214	-0.0177177	-0.0177177	0.0037994	0.0037994	0.00381653
		312	0.995773	1.48966e+08	0.991565	1.00057	1.00031	-0.00450487	0.0160787	2.00089	0.000262798	0.000278819	0.0166979	6.07945e-06	1.00057	1.00031	0.828636	-0.594129	-34.0411	-1.61575	-92.5756	1.02162	58.5345	0.521985	0.852955	-1.61575	-92.5756	-0.0449382	-0.99899	-0.0160659	0.00455038	-0.962152	0.272513	2.86559	164.186	-0.269787	0.96292	1.84397	105.652	0.00027959	0.016721	2.50142e+06	0.0177315	0.0177315	-0.0177278	-0.0177278	0.00376077	0.00376077	0.00377791
2016-03-20	79	313	0.995843	1.48976e+08	0.991703	1.00057	1.00031	-0.00443571	0.0160979	2.00089	0.000264611	0.000278818	0.0166979	5.70484e-06	1.00057	1.0003	0.834355	-0.583835	-33.4513	-1.6106	-92.2807	1.02677	58.8295	0.517587	0.85563	-1.6106	-92.2807	-0.0397954	-0.999208	-0.0160697	0.00453675	-0.962383	0.271696	2.86644	164.235	-0.265645	0.964071	1.83967	105.405	0.000279216	0.0167098	2.49974e+06	0.017728	0.017728	-0.0177243	-0.0177243	0.00377457	0.00377457	0.0037917
		314	0.995913	1.48986e+08	0.991843	1.00058	1.00031	-0.00436638	0.0161171	2.00088	0.000266758	0.000278827	0.0166981	5.49722e-06	1.00057	1.0003	0.841122	-0.571441	-32.7412	-1.60441	-91.9257	1.03296	59.1845	0.512275	0.858821	-1.60441	-91.9257	-0.0336029	-0.999435	-0.0160785	0.00450646	-0.962894	0.269879	2.86833	164.343	-0.261489	0.965206	1.83536	105.158	0.000279008	0.0167035	2.49881e+06	0.0177204	0.0177204	-0.0177168	-0.0177168	0.00380533	0.00380533	0.00382246
		315	0.995983	1.48997e+08	0.991983	1.00058	1.00031	-0.00429705	0.0161357	2.00089	0.000267707	0.000278826	0.0166981	5.8974e-06	1.00057	1.0003	0.844117	-0.56588	-32.4225	-1.60162	-91.7663	1.03575	59.3438	0.509885	0.860243	-1.60162	-91.7663	-0.0308236	-0.999525	-0.0160716	0.00453086	-0.962484	0.27134	2.86681	164.256	-0.257338	0.966322	1.83106	104.912	0.000279408	0.0167155	2.50061e+06	0.0177267	0.0177267	-0.017723	-0.017723	0.00378065	0.00378065	0.00379778
		316	0.996053	1.49007e+08	0.992122	1.00058	1.00031	-0.00422754	0.0161543	2.00089	0.000268315	0.000278835	0.0166983	6.12695e-06	1.00057	1.0003	0.846032	-0.562299	-32.2174	-1.59983	-91.6638	1.03754	59.4464	0.508344	0.861154	-1.59983	-91.6638	-0.029034	-0.999578	-0.0160604	0.00457139	-0.961797	0.273763	2.86429	164.112	-0.253171	0.967421	1.82675	104.665	0.000279638	0.0167224	2.50163e+06	0.0177373	0.0177373	-0.0177337	-0.0177337	0.00373973	0.00373973	0.00375688
2016-03-21	80	317	0.996123	1.49018e+08	0.992262	1.00058	1.00031	-0.00415804	0.0161723	2.00089	0.000270201	0.000278833	0.0166983	5.72655e-06	1.00057	1.0003	0.85198	-0.551041	-31.5723	-1.59421	-91.3413	1.04316	59.7689	0.503489	0.864002	-1.59421	-91.3413	-0.0234072	-0.999726	-0.0160664	0.00455002	-0.96216	0.272484	2.86562	164.188	-0.24901	0.968501	1.82245	104.419	0.000279238	0.0167104	2.49984e+06	0.0177318	0.0177318	-0.0177282	-0.0177282	0.00376135	0.00376135	0.00377849
		318	0.996194	1.49028e+08	0.992402	1.00058	1.00031	-0.0040884	0.0161903	2.00088	0.00027237	0.00027884	0.0166985	5.46828e-06	1.00057	1.0003	0.85882	-0.537835	-30.8157	-1.5876	-90.9629	1.04977	60.1473	0.497773	0.867308	-1.5876	-90.9629	-0.0168052	-0.999859	-0.016077	0.00451318	-0.962783	0.270274	2.86791	164.319	-0.244836	0.969564	1.81815	104.172	0.000278979	0.0167027	2.49868e+06	0.0177226	0.0177226	-0.0177189	-0.0177189	0.00379874	0.00379874	0.00381587
		319	0.996264	1.49039e+08	0.992542	1.00058	1.00031	-0.00401876	0.0162076	2.00089	0.000273319	0.000278838	0.0166984	5.83007e-06	1.00057	1.0003	0.861811	-0.531967	-30.4795	-1.58467	-90.7948	1.0527	60.3154	0.495226	0.868764	-1.58467	-90.7948	-0.0138717	-0.999904	-0.0160708	0.00453509	-0.962414	0.271588	2.86655	164.241	-0.240667	0.970608	1.81385	103.926	0.000279341	0.0167135	2.5003e+06	0.0177281	0.0177281	-0.0177245	-0.0177245	0.00377654	0.00377654	0.00379368
		320	0.996334	1.49049e+08	0.992682	1.00058	1.00031	-0.00394893	0.016225	2.00089	0.0002739	0.000278845	0.0166986	6.00871e-06	1.00057	1.0003	0.863643	-0.528343	-30.2718	-1.58286	-90.691	1.05451	60.4192	0.493651	0.86966	-1.58286	-90.691	-0.0120601	-0.999927	-0.0160596	0.00457526	-0.961732	0.27399	2.86405	164.098	-0.236482	0.971636	1.80954	103.679	0.00027952	0.0167188	2.5011e+06	0.0177386	0.0177386	-0.017735	-0.017735	0.00373596	0.00373596	0.00375311
2016-03-22	81	321	0.996405	1.4906e+08	0.992822	1.00058	1.0003	-0.0038791	0.0162418	2.00088	0.000275659	0.000278842	0.0166986	5.60818e-06	1.00057	1.0003	0.86919	-0.517235	-29.6354	-1.5773	-90.3728	1.06007	60.7374	0.488813	0.872388	-1.5773	-90.3728	-0.00650627	-0.999979	-0.0160653	0.00455512	-0.962075	0.272785	2.86531	164.17	-0.232301	0.972644	1.80524	103.433	0.000279119	0.0167069	2.49931e+06	0.0177334	0.0177334	-0.0177297	-0.0177297	0.00375634	0.00375634	0.00377348
		322	0.996475	1.49071e+08	0.992963	1.00058	1.0003	-0.00380914	0.0162585	2.00088	0.000277676	0.00027885	0.0166988	5.33736e-06	1.00058	1.0003	0.87555	-0.504223	-28.8898	-1.5708	-90	1.06657	61.1102	0.483127	0.87555	-1.5708	-90	-2.15919e-15	-1	-0.0160755	0.00451985	-0.962672	0.270669	2.8675	164.296	-0.228109	0.973636	1.80093	103.186	0.000278848	0.0166988	2.4981e+06	0.0177246	0.0177246	-0.0177209	-0.0177209	0.00379214	0.00379214	0.00380927
		323	0.996546	1.49081e+08	0.993103	1.00058	1.0003	-0.00373919	0.0162747	2.00089	0.000278522	0.000278848	0.0166987	5.66197e-06	1.00058	1.0003	0.878218	-0.498673	-28.5719	-1.56802	-89.841	1.06935	61.2691	0.480696	0.876887	-1.56802	-89.841	0.00277464	-0.999996	-0.0160685	0.00454435	-0.962259	0.272137	2.86598	164.209	-0.22392	0.974607	1.79663	102.939	0.000279173	0.0167085	2.49955e+06	0.0177308	0.0177308	-0.0177272	-0.0177272	0.00376733	0.00376733	0.00378446
		324	0.996616	1.49092e+08	0.993244	1.00058	1.0003	-0.00366912	0.0162909	2.00089	0.000279152	0.000278856	0.016699	5.87878e-06	1.00058	1.0003	0.880202	-0.494508	-28.3332	-1.56594	-89.7217	1.07143	61.3885	0.478869	0.877887	-1.56594	-89.7217	0.00485726	-0.999988	-0.0160586	0.00458013	-0.961651	0.274276	2.86376	164.081	-0.219721	0.975563	1.79232	102.693	0.00027939	0.016715	2.50052e+06	0.0177402	0.0177402	-0.0177365	-0.0177365	0.0037312	0.0037312	0.00374835
2016-03-23	82	325	0.996687	1.49102e+08	0.993385	1.00058	1.0003	-0.00359905	0.0163065	2.00088	0.000280934	0.000278856	0.016699	5.52908e-06	1.00058	1.0003	0.885821	-0.482536	-27.6473	-1.55995	-89.3787	1.07742	61.7315	0.473605	0.880738	-1.55995	-89.3787	0.0108433	-0.999941	-0.0160663	0.00455303	-0.962112	0.272653	2.86544	164.178	-0.215525	0.976498	1.78803	102.446	0.00027904	0.0167045	2.49896e+06	0.0177332	0.0177332	-0.0177296	-0.0177296	0.00375865	0.00375865	0.00377579
		326	0.996758	1.49113e+08	0.993526	1.00058	1.0003	-0.00352889	0.0163221	2.00088	0.000282899	0.000278865	0.0166993	5.27175e-06	1.00058	1.0003	0.89202	-0.469003	-26.8719	-1.55319	-88.991	1.08418	62.1191	0.467634	0.883922	-1.55319	-88.991	0.0176091	-0.999845	-0.0160777	0.00451352	-0.962781	0.270283	2.86791	164.319	-0.211321	0.977417	1.78372	102.2	0.000278783	0.0166968	2.4978e+06	0.0177234	0.0177234	-0.0177197	-0.0177197	0.00379877	0.00379877	0.0038159
		327	0.996828	1.49123e+08	0.993667	1.00058	1.0003	-0.00345874	0.0163371	2.00089	0.00028362	0.000278864	0.0166992	5.64668e-06	1.00058	1.0003	0.894293	-0.463948	-26.5823	-1.55066	-88.8462	1.08671	62.2639	0.465399	0.885101	-1.55066	-88.8462	0.0201359	-0.999797	-0.0160697	0.00454194	-0.962301	0.271985	2.86614	164.218	-0.20712	0.978316	1.77943	101.954	0.000279158	0.016708	2.49948e+06	0.0177307	0.0177307	-0.017727	-0.017727	0.00377	0.00377	0.00378714
		328	0.996899	1.49134e+08	0.993808	1.00058	1.0003	-0.00338837	0.0163521	2.00089	0.000283924	0.000278872	0.0166995	5.81347e-06	1.00058	1.00029	0.895251	-0.461803	-26.4594	-1.54959	-88.7848	1.08778	62.3254	0.46445	0.8856	-1.54959	-88.7848	0.0212082	-0.999775	-0.0160551	0.00459398	-0.961416	0.275098	2.8629	164.032	-0.202903	0.979199	1.77512	101.707	0.000279324	0.016713	2.50023e+06	0.0177441	0.0177441	-0.0177405	-0.0177405	0.0037174	0.0037174	0.00373455
2016-03-24	83	329	0.99697	1.49145e+08	0.993949	1.00058	1.0003	-0.003318	0.0163664	2.00088	0.000285508	0.00027887	0.0166994	5.3502e-06	1.00058	1.00029	0.900244	-0.450467	-25.8098	-1.54392	-88.46	1.09345	62.6502	0.459422	0.888218	-1.54392	-88.46	0.0268749	-0.999639	-0.0160613	0.004572	-0.961792	0.273782	2.86427	164.111	-0.19869	0.980062	1.77082	101.46	0.000278861	0.0166991	2.49816e+06	0.0177385	0.0177385	-0.0177349	-0.0177349	0.00373965	0.00373965	0.00375679
		330	0.997041	1.49155e+08	0.994091	1.00059	1.0003	-0.00324751	0.0163808	2.00088	0.00028735	0.000278877	0.0166996	5.01672e-06	1.00058	1.00029	0.906054	-0.436934	-25.0344	-1.53715	-88.0723	1.10022	63.0379	0.453402	0.891306	-1.53715	-88.0723	0.0336382	-0.999434	-0.0160727	0.00453255	-0.962462	0.271417	2.86673	164.251	-0.194466	0.980909	1.76651	101.214	0.000278528	0.0166892	2.49666e+06	0.0177286	0.0177286	-0.017725	-0.017725	0.00377969	0.00377969	0.00379683
		331	0.997112	1.49166e+08	0.994232	1.00059	1.0003	-0.00317701	0.0163945	2.00088	0.000287997	0.000278874	0.0166995	5.29087e-06	1.00058	1.00029	0.908094	-0.432087	-24.7568	-1.53473	-87.9335	1.10264	63.1767	0.451241	0.892402	-1.53473	-87.9335	0.0360599	-0.99935	-0.0160641	0.00456271	-0.961951	0.273224	2.86485	164.144	-0.190246	0.981737	1.76221	100.967	0.000278802	0.0166974	2.49789e+06	0.0177363	0.0177363	-0.0177326	-0.0177326	0.00374913	0.00374913	0.00376627
		332	0.997183	1.49176e+08	0.994374	1.00059	1.0003	-0.00310642	0.0164083	2.00088	0.000288453	0.000278882	0.0166998	5.46984e-06	1.00058	1.00029	0.909531	-0.428642	-24.5594	-1.53301	-87.8348	1.10436	63.2754	0.449702	0.893178	-1.53301	-87.8348	0.0377815	-0.999286	-0.0160525	0.00460426	-0.961241	0.275708	2.86227	163.996	-0.186016	0.982547	1.7579	100.72	0.000278981	0.0167027	2.49869e+06	0.017747	0.017747	-0.0177434	-0.0177434	0.00370713	0.00370713	0.00372428
2016-03-25	84	333	0.997254	1.49187e+08	0.994515	1.00059	1.0003	-0.00303583	0.0164214	2.00088	0.000290088	0.00027888	0.0166997	5.06954e-06	1.00058	1.00029	0.914685	-0.41607	-23.839	-1.52672	-87.4746	1.11065	63.6356	0.444079	0.895988	-1.52672	-87.4746	0.0440623	-0.999029	-0.0160616	0.00457236	-0.961787	0.273799	2.86425	164.11	-0.181789	0.983338	1.7536	100.474	0.000278581	0.0166907	2.4969e+06	0.0177389	0.0177389	-0.0177353	-0.0177353	0.00373944	0.00373944	0.00375659
		334	0.997325	1.49198e+08	0.994657	1.00059	1.0003	-0.00296516	0.0164346	2.00088	0.000291881	0.000278889	0.0167	4.74918e-06	1.00058	1.00029	0.92034	-0.401847	-23.0242	-1.51961	-87.0672	1.11776	64.043	0.437696	0.899123	-1.51961	-87.0672	0.0511653	-0.99869	-0.0160746	0.00452733	-0.962552	0.271098	2.86706	164.27	-0.177555	0.984111	1.7493	100.227	0.00027826	0.0166811	2.49546e+06	0.0177276	0.0177276	-0.017724	-0.017724	0.00378516	0.00378516	0.00380229
		335	0.997396	1.49208e+08	0.994799	1.00059	1.0003	-0.00289449	0.0164472	2.00088	0.000292455	0.000278887	0.0166999	5.04872e-06	1.00058	1.00029	0.922149	-0.397196	-22.7577	-1.51728	-86.9339	1.12009	64.1762	0.435604	0.900138	-1.51728	-86.9339	0.0534876	-0.998569	-0.0160656	0.00455901	-0.962015	0.272996	2.86509	164.157	-0.173324	0.984865	1.745	99.9811	0.00027856	0.0166901	2.4968e+06	0.0177357	0.0177357	-0.0177321	-0.0177321	0.00375306	0.00375306	0.0037702
		336	0.997467	1.49219e+08	0.994941	1.00059	1.0003	-0.00282367	0.0164597	2.00088	0.000292737	0.000278895	0.0167001	5.20295e-06	1.00058	1.00029	0.92304	-0.394887	-22.6254	-1.51613	-86.8678	1.12124	64.2424	0.434565	0.900641	-1.51613	-86.8678	0.0546405	-0.998506	-0.0160513	0.0046097	-0.96115	0.276027	2.86193	163.977	-0.16908	0.985602	1.74069	99.7344	0.000278714	0.0166947	2.4975e+06	0.0177488	0.0177488	-0.0177452	-0.0177452	0.00370181	0.00370181	0.00371896
2016-03-26	85	337	0.997538	1.4923e+08	0.995083	1.00059	1.00029	-0.00275285	0.0164717	2.00088	0.000294224	0.000278894	0.0167001	4.76515e-06	1.00058	1.00029	0.927727	-0.382519	-21.9167	-1.50994	-86.5134	1.12743	64.5967	0.428987	0.903311	-1.50994	-86.5134	0.0608143	-0.998149	-0.01606	0.00457944	-0.961668	0.274216	2.86382	164.085	-0.16484	0.98632	1.73639	99.488	0.000278276	0.0166816	2.49553e+06	0.0177411	0.0177411	-0.0177375	-0.0177375	0.00373246	0.00373246	0.00374961
		338	0.99761	1.4924e+08	0.995225	1.00059	1.00029	-0.00268196	0.0164836	2.00088	0.00029587	0.000278902	0.0167004	4.40734e-06	1.00058	1.00029	0.932917	-0.368365	-21.1058	-1.50287	-86.108	1.1345	65.0022	0.422583	0.906324	-1.50287	-86.108	0.0678765	-0.997694	-0.0160728	0.00453498	-0.962424	0.27155	2.86659	164.243	-0.160593	0.987021	1.73209	99.2413	0.000277918	0.0166709	2.49393e+06	0.01773	0.01773	-0.0177263	-0.0177263	0.00377762	0.00377762	0.00379475
		339	0.997681	1.49251e+08	0.995368	1.00059	1.00029	-0.00261106	0.0164949	2.00088	0.000296272	0.0002789	0.0167003	4.68168e-06	1.00059	1.00029	0.934184	-0.364831	-20.9033	-1.5011	-86.0067	1.13627	65.1034	0.420981	0.907069	-1.5011	-86.0067	0.0696393	-0.997572	-0.0160612	0.00457564	-0.961734	0.273986	2.86406	164.098	-0.156348	0.987702	1.72779	98.995	0.000278193	0.0166791	2.49516e+06	0.0177403	0.0177403	-0.0177367	-0.0177367	0.00373641	0.00373641	0.00375356
		340	0.997752	1.49262e+08	0.99551	1.00059	1.00029	-0.00254004	0.0165062	2.00088	0.000296433	0.000278908	0.0167005	4.83583e-06	1.00059	1.00029	0.934691	-0.363407	-20.8217	-1.50039	-85.9659	1.13698	65.1442	0.420335	0.907369	-1.50039	-85.9659	0.0703495	-0.997522	-0.0160449	0.00463341	-0.960743	0.277441	2.86046	163.892	-0.152093	0.988366	1.72348	98.7483	0.000278347	0.0166837	2.49585e+06	0.0177551	0.0177551	-0.0177515	-0.0177515	0.00367795	0.00367795	0.00369511
2016-03-27	86	341	0.997824	1.49272e+08	0.995652	1.00059	1.00029	-0.00246902	0.016517	2.00088	0.000297823	0.000278906	0.0167005	4.38522e-06	1.00059	1.00029	0.939075	-0.350866	-20.1031	-1.49412	-85.6066	1.14325	65.5035	0.414637	0.909987	-1.49412	-85.6066	0.0766033	-0.997062	-0.016054	0.00460177	-0.961288	0.275547	2.86243	164.005	-0.147841	0.989011	1.71918	98.5018	0.000277896	0.0166702	2.49383e+06	0.0177471	0.0177471	-0.0177435	-0.0177435	0.00371001	0.00371001	0.00372717
		342	0.997895	1.49283e+08	0.995795	1.00059	1.00029	-0.00239791	0.0165277	2.00088	0.000299398	0.000278914	0.0167007	4.02709e-06	1.00059	1.00029	0.944042	-0.33612	-19.2583	-1.48674	-85.1842	1.15063	65.926	0.407917	0.913019	-1.48674	-85.1842	0.0839525	-0.99647	-0.0160682	0.00455258	-0.962128	0.272598	2.8655	164.181	-0.143581	0.989639	1.71488	98.2551	0.000277538	0.0166595	2.49222e+06	0.0177349	0.0177349	-0.0177312	-0.0177312	0.00375998	0.00375998	0.00377713
		343	0.997967	1.49294e+08	0.995937	1.00059	1.00029	-0.00232681	0.0165378	2.00088	0.000299753	0.000278912	0.0167007	4.2888e-06	1.00059	1.00029	0.945162	-0.332705	-19.0626	-1.48504	-85.0864	1.15233	66.0238	0.406357	0.913714	-1.48504	-85.0864	0.085654	-0.996325	-0.0160563	0.00459421	-0.961418	0.275091	2.86291	164.033	-0.139324	0.990247	1.71058	98.0087	0.0002778	0.0166673	2.4934e+06	0.0177454	0.0177454	-0.0177418	-0.0177418	0.00371777	0.00371777	0.00373493
		344	0.998038	1.49304e+08	0.99608	1.00059	1.00029	-0.00225561	0.0165479	2.00088	0.000299943	0.00027892	0.0167009	4.46794e-06	1.00059	1.00029	0.945761	-0.330866	-18.9572	-1.48412	-85.0337	1.15325	66.0765	0.405517	0.914088	-1.48412	-85.0337	0.08657	-0.996246	-0.0160409	0.00464861	-0.960481	0.278345	2.85952	163.839	-0.135059	0.990838	1.70627	97.762	0.000277979	0.0166727	2.4942e+06	0.0177592	0.0177592	-0.0177557	-0.0177557	0.00366268	0.00366268	0.00367984
2016-03-28	87	345	0.99811	1.49315e+08	0.996223	1.00059	1.00029	-0.00218442	0.0165574	2.00088	0.000301338	0.000278918	0.0167008	4.05501e-06	1.00059	1.00029	0.950158	-0.317054	-18.1659	-1.47721	-84.638	1.16016	66.4722	0.399195	0.916866	-1.47721	-84.638	0.0934478	-0.995624	-0.0160529	0.0046068	-0.961203	0.275842	2.86213	163.988	-0.130797	0.991409	1.70197	97.5156	0.000277566	0.0166603	2.49235e+06	0.0177487	0.0177487	-0.0177451	-0.0177451	0.0037051	0.0037051	0.00372225
		346	0.998181	1.49326e+08	0.996366	1.00059	1.00029	-0.0021132	0.0165669	2.00088	0.000302792	0.000278927	0.0167011	3.6722e-06	1.00059	1.00029	0.954743	-0.302001	-17.3034	-1.46969	-84.2068	1.16768	66.9034	0.392283	0.919845	-1.46969	-84.2068	0.100939	-0.994893	-0.0160679	0.00455508	-0.962087	0.272741	2.86535	164.173	-0.12653	0.991963	1.69767	97.2691	0.000277183	0.0166488	2.49063e+06	0.0177359	0.0177359	-0.0177322	-0.0177322	0.00375764	0.00375764	0.00377478
		347	0.998253	1.49336e+08	0.996508	1.00059	1.00029	-0.00204198	0.0165758	2.00088	0.000303051	0.000278926	0.0167011	3.89689e-06	1.00059	1.00029	0.955561	-0.299238	-17.1451	-1.4683	-84.1276	1.16907	66.9826	0.391011	0.920386	-1.4683	-84.1276	0.102313	-0.994752	-0.0160545	0.00460191	-0.961288	0.275546	2.86244	164.005	-0.122266	0.992497	1.69337	97.0229	0.000277408	0.0166556	2.49164e+06	0.0177477	0.0177477	-0.0177441	-0.0177441	0.00371017	0.00371017	0.00372732
		348	0.998324	1.49347e+08	0.996651	1.00059	1.00029	-0.00197064	0.0165847	2.00088	0.000303095	0.000278935	0.0167013	4.01399e-06	1.00059	1.00029	0.9557	-0.298768	-17.1181	-1.46807	-84.1141	1.1693	66.996	0.390795	0.920478	-1.46807	-84.1141	0.102547	-0.994728	-0.0160359	0.00466727	-0.960159	0.279455	2.85837	163.772	-0.117993	0.993014	1.68906	96.7763	0.000277525	0.0166591	2.49216e+06	0.0177643	0.0177643	-0.0177608	-0.0177608	0.00364395	0.00364395	0.00366112
2016-03-29	88	349	0.998396	1.49358e+08	0.996794	1.00059	1.00029	-0.00189931	0.0165929	2.00088	0.00030442	0.000278933	0.0167013	3.50087e-06	1.00059	1.00028	0.959877	-0.284233	-16.2854	-1.4608	-83.6978	1.17657	67.4124	0.384096	0.923293	-1.4608	-83.6978	0.109773	-0.993957	-0.0160497	0.00461965	-0.960984	0.276605	2.86133	163.942	-0.113722	0.993513	1.68477	96.5299	0.000277012	0.0166437	2.48986e+06	0.0177524	0.0177524	-0.0177488	-0.0177488	0.00369228	0.00369228	0.00370944
		350	0.998467	1.49369e+08	0.996937	1.00059	1.00029	-0.0018279	0.0166012	2.00088	0.000305905	0.000278941	0.0167015	3.06779e-06	1.00059	1.00028	0.964558	-0.267034	-15.2999	-1.4522	-83.205	1.18517	67.9051	0.376141	0.926562	-1.4522	-83.205	0.118317	-0.992976	-0.0160696	0.00455073	-0.962163	0.272474	2.86563	164.188	-0.109445	0.993993	1.68046	96.2833	0.000276579	0.0166307	2.48791e+06	0.0177352	0.0177352	-0.0177315	-0.0177315	0.00376225	0.00376225	0.00377939
		351	0.998539	1.49379e+08	0.99708	1.00059	1.00029	-0.00175649	0.0166088	2.00088	0.000306096	0.000278938	0.0167014	3.29137e-06	1.00059	1.00028	0.965162	-0.264735	-15.1682	-1.45105	-83.1392	1.18632	67.971	0.375076	0.926994	-1.45105	-83.1392	0.119458	-0.992839	-0.0160551	0.00460131	-0.9613	0.275504	2.86248	164.008	-0.10517	0.994454	1.67616	96.037	0.000276802	0.0166374	2.48892e+06	0.0177479	0.0177479	-0.0177443	-0.0177443	0.00371096	0.00371096	0.00372811
		352	0.998611	1.4939e+08	0.997223	1.00059	1.00029	-0.00168502	0.0166164	2.00088	0.000306173	0.000278945	0.0167016	3.45749e-06	1.00059	1.00028	0.965403	-0.263813	-15.1154	-1.45059	-83.1128	1.18678	67.9974	0.374649	0.927167	-1.45059	-83.1128	0.119915	-0.992784	-0.0160375	0.00466303	-0.960234	0.279196	2.85864	163.788	-0.10089	0.994898	1.67186	95.7904	0.000276969	0.0166424	2.48966e+06	0.0177636	0.0177636	-0.01776	-0.01776	0.00364842	0.00364842	0.00366558
2016-03-30	89	353	0.998682	1.49401e+08	0.997367	1.00059	1.00029	-0.00161355	0.0166235	2.00088	0.000307403	0.000278943	0.0167016	3.05692e-06	1.00059	1.00028	0.969282	-0.248504	-14.2382	-1.44294	-82.6742	1.19443	68.436	0.367541	0.930007	-1.44294	-82.6742	0.127511	-0.991837	-0.016053	0.00460918	-0.961165	0.275973	2.86199	163.98	-0.0966107	0.995322	1.66756	95.544	0.000276568	0.0166303	2.48786e+06	0.0177501	0.0177501	-0.0177465	-0.0177465	0.00370305	0.00370305	0.00372021
		354	0.998754	1.49411e+08	0.99751	1.00059	1.00029	-0.00154204	0.0166305	2.00088	0.000308718	0.000278951	0.0167018	2.69895e-06	1.00059	1.00028	0.973429	-0.231041	-13.2377	-1.43421	-82.1739	1.20316	68.9362	0.359406	0.933181	-1.43421	-82.1739	0.136167	-0.990686	-0.0160735	0.0045381	-0.962378	0.271713	2.86642	164.234	-0.0923278	0.995729	1.66326	95.2975	0.00027621	0.0166196	2.48625e+06	0.0177323	0.0177323	-0.0177286	-0.0177286	0.0037752	0.0037752	0.00379233
		355	0.998826	1.49422e+08	0.997653	1.00059	1.00029	-0.00147054	0.0166369	2.00088	0.000308789	0.000278949	0.0167018	2.97304e-06	1.00059	1.00028	0.973654	-0.230054	-13.1811	-1.43371	-82.1456	1.20366	68.9645	0.358946	0.933358	-1.43371	-82.1456	0.136655	-0.990619	-0.016056	0.00459921	-0.961338	0.275373	2.86262	164.016	-0.0880466	0.996116	1.65896	95.0512	0.000276484	0.0166278	2.48748e+06	0.0177477	0.0177477	-0.0177441	-0.0177441	0.00371326	0.00371326	0.00373041
		356	0.998898	1.49433e+08	0.997797	1.00059	1.00029	-0.0013989	0.0166433	2.00088	0.000308621	0.000278957	0.016702	3.12708e-06	1.00059	1.00028	0.973122	-0.232376	-13.3142	-1.43487	-82.2122	1.2025	68.898	0.360029	0.932941	-1.43487	-82.2122	0.135505	-0.990777	-0.0160309	0.00468699	-0.959818	0.280624	2.85715	163.703	-0.0837565	0.996486	1.65465	94.8045	0.000276638	0.0166324	2.48818e+06	0.0177699	0.0177699	-0.0177664	-0.0177664	0.00362424	0.00362424	0.00364142
2016-03-31	90	357	0.998969	1.49444e+08	0.99794	1.00059	1.00028	-0.00132727	0.0166491	2.00088	0.000309733	0.000278954	0.0167019	2.65087e-06	1.00059	1.00028	0.976629	-0.216622	-12.4115	-1.427	-81.7609	1.21037	69.3493	0.35267	0.935748	-1.427	-81.7609	0.143305	-0.989679	-0.0160474	0.00462964	-0.960814	0.277192	2.86072	163.907	-0.079468	0.996837	1.65035	94.558	0.000276162	0.0166181	2.48604e+06	0.0177555	0.0177555	-0.017752	-0.017752	0.00368246	0.00368246	0.00369962
		358	0.999041	1.49454e+08	0.998083	1.00059	1.00028	-0.00125561	0.0166549	2.00088	0.000310905	0.000278961	0.0167021	2.2048e-06	1.00059	1.00028	0.980326	-0.198691	-11.3842	-1.41803	-81.2472	1.21934	69.863	0.344266	0.938872	-1.41803	-81.2472	0.152172	-0.988354	-0.0160691	0.00455485	-0.962096	0.272711	2.86538	164.174	-0.0751766	0.99717	1.64604	94.3114	0.000275716	0.0166047	2.48403e+06	0.0177369	0.0177369	-0.0177332	-0.0177332	0.00375839	0.00375839	0.00377553
		359	0.999113	1.49465e+08	0.998227	1.00059	1.00028	-0.00118395	0.01666	2.00088	0.000310859	0.000278959	0.0167021	2.37849e-06	1.00059	1.00028	0.980179	-0.199435	-11.4268	-1.4184	-81.2685	1.21897	69.8417	0.344615	0.938744	-1.4184	-81.2685	0.151805	-0.98841	-0.0160475	0.00462987	-0.960811	0.277204	2.86071	163.907	-0.0708865	0.997484	1.64174	94.0649	0.00027589	0.0166099	2.48481e+06	0.0177557	0.0177557	-0.0177522	-0.0177522	0.00368229	0.00368229	0.00369946
		360	0.999185	1.49476e+08	0.99837	1.00059	1.00028	-0.00111227	0.0166652	2.00088	0.000310772	0.000278966	0.0167023	2.5323e-06	1.00059	1.00028	0.979906	-0.200806	-11.5053	-1.41909	-81.3078	1.21828	69.8024	0.345259	0.938508	-1.41909	-81.3078	0.151127	-0.988514	-0.0160244	0.00470993	-0.959416	0.281993	2.85572	163.621	-0.0665938	0.99778	1.63744	93.8184	0.000276043	0.0166146	2.4855e+06	0.0177758	0.0177758	-0.0177723	-0.0177723	0.00360104	0.00360104	0.00361822
2016-04-01	91	361	0.999257	1.49487e+08	0.998514	1.00059	1.00028	-0.00104058	0.0166698	2.00088	0.000311865	0.000278964	0.0167022	2.10668e-06	1.00059	1.00028	0.983352	-0.182725	-10.4693	-1.41005	-80.7898	1.22732	70.3204	0.33676	0.941591	-1.41005	-80.7898	0.160058	-0.987108	-0.0160465	0.00463391	-0.960742	0.277443	2.86046	163.892	-0.0623021	0.998057	1.63314	93.572	0.000275618	0.0166017	2.48358e+06	0.0177569	0.0177569	-0.0177533	-0.0177533	0.00367828	0.00367828	0.00369545
		362	0.999328	1.49497e+08	0.998657	1.0006	1.00028	-0.000968913	0.0166744	2.00088	0.000312943	0.000278973	0.0167025	1.67373e-06	1.00059	1.00028	0.986752	-0.162957	-9.33674	-1.40016	-80.2235	1.23721	70.8867	0.327437	0.944873	-1.40016	-80.2235	0.169806	-0.985477	-0.0160724	0.0045443	-0.962276	0.272073	2.86605	164.212	-0.0580101	0.998316	1.62884	93.3256	0.000275185	0.0165887	2.48163e+06	0.0177345	0.0177345	-0.0177309	-0.0177309	0.00376925	0.00376925	0.00378639
		363	0.9994	1.49508e+08	0.998801	1.0006	1.00028	-0.000897242	0.0166786	2.00088	0.000313368	0.000278981	0.0167027	1.57781e-06	1.00059	1.00028	0.988091	-0.154485	-8.85135	-1.39593	-79.9808	1.24144	71.1294	0.323432	0.946252	-1.39593	-79.9808	0.173979	-0.984749	-0.0160724	0.00454537	-0.962259	0.272134	2.86598	164.209	-0.0537183	0.998556	1.62454	93.0793	0.000275089	0.0165858	2.4812e+06	0.017735	0.017735	-0.0177314	-0.0177314	0.00376828	0.00376828	0.00378542
		364	0.999472	1.49519e+08	0.998944	1.0006	1.00028	-0.000825545	0.0166829	2.00088	0.000313753	0.000278999	0.0167033	1.46201e-06	1.00059	1.00028	0.989304	-0.146389	-8.38745	-1.39188	-79.7488	1.24549	71.3614	0.319598	0.947553	-1.39188	-79.7488	0.177964	-0.984037	-0.0160717	0.00454956	-0.962191	0.272376	2.86573	164.194	-0.0494242	0.998778	1.62024	92.833	0.000274973	0.0165823	2.48068e+06	0.0177366	0.0177366	-0.017733	-0.017733	0.00376431	0.00376431	0.00378145
2016-04-02	92	365	0.999544	1.4953e+08	0.999088	1.0006	1.00028	-0.000753849	0.0166865	2.00088	0.000315419	0.000279006	0.0167035	7.15933e-07	1.00059	1.00028	0.994557	-0.104381	-5.98062	-1.37088	-78.5454	1.26649	72.5648	0.299627	0.954056	-1.37088	-78.5454	0.198592	-0.980082	-0.0161457	0.00428051	-0.966607	0.256264	2.88244	165.151	-0.0451313	0.998981	1.61594	92.5867	0.000274227	0.0165598	2.47731e+06	0.0176658	0.0176658	-0.0176619	-0.0176619	0.00403564	0.00403564	0.00405272
		366	0.999616	1.4954e+08	0.999231	1.0006	1.00028	-0.000682128	0.0166901	2.00087	0.000317145	0.000279024	0.016704	-2.22045e-16	1.0006	1.00028	1	0	0	-1.31868	-75.5551	1.31868	75.5551	0.249449	0.968388	-1.31868	-75.5551	0.249449	-0.968388	-0.0163326	0.00350276	-0.977767	0.209696	2.93033	167.895	-0.0408362	0.999166	1.61164	92.3404	0.000273511	0.0165382	2.47407e+06	0.0174354	0.0174354	-0.0174308	-0.0174308	0.00480701	0.00480701	0.00482386
		367	0.999687	1.49551e+08	0.999375	1.0006	1.00028	-0.000610407	0.0166926	2.00087	0.000316644	0.000279014	0.0167037	4.07733e-07	1.0006	1.00028	0.998422	0.0561945	3.21971	-1.29059	-73.9452	1.34678	77.1649	0.222145	0.975014	-1.29059	-73.9452	0.276556	-0.960998	-0.0164111	0.00311302	-0.98248	0.186367	2.95413	169.259	-0.0365431	0.999332	1.60735	92.0942	0.000273919	0.0165505	2.47592e+06	0.0173054	0.0173054	-0.0173004	-0.0173004	0.00518621	0.00518621	0.00520294
		368	0.999759	1.49562e+08	0.999518	1.0006	1.00028	-0.000538598	0.0166951	2.00088	0.000315979	0.000279015	0.0167037	7.33041e-07	1.00059	1.00028	0.996323	0.0857803	4.91485	-1.27579	-73.0977	1.36158	78.0125	0.207698	0.978193	-1.27579	-73.0977	0.290741	-0.956802	-0.0164429	0.00294068	-0.984381	0.176049	2.96462	169.86	-0.0322441	0.99948	1.60305	91.8478	0.000274244	0.0165603	2.47739e+06	0.0172452	0.0172452	-0.01724	-0.01724	0.00535248	0.00535248	0.00536915
2016-04-03	93	369	0.999831	1.49573e+08	0.999662	1.0006	1.00028	-0.000466789	0.016697	2.00087	0.000316467	0.000279007	0.0167035	4.91615e-07	1.0006	1.00028	0.997864	0.0653765	3.7458	-1.286	-73.6822	1.35137	77.428	0.217667	0.976023	-1.286	-73.6822	0.280965	-0.959718	-0.0163982	0.00317878	-0.981725	0.190306	2.95012	169.029	-0.0279456	0.999609	1.59875	91.6014	0.000274003	0.016553	2.4763e+06	0.0173278	0.0173278	-0.0173228	-0.0173228	0.00512242	0.00512242	0.00513917
		370	0.999903	1.49583e+08	0.999806	1.0006	1.00028	-0.00039498	0.0166989	2.00087	0.000316966	0.000279009	0.0167036	2.55347e-07	1.0006	1.00028	0.999437	0.033564	1.92307	-1.3019	-74.5935	1.33547	76.5166	0.233163	0.972438	-1.3019	-74.5935	0.265665	-0.964065	-0.0163307	0.00350948	-0.977679	0.210103	2.92991	167.872	-0.0236464	0.99972	1.59444	91.355	0.000273766	0.0165459	2.47523e+06	0.0174371	0.0174371	-0.0174325	-0.0174325	0.00480021	0.00480021	0.00481706
		371	0.999975	1.49594e+08	0.999949	1.0006	1.00028	-0.000323171	0.0167002	2.00087	0.000316296	0.000279002	0.0167034	6.14216e-07	1.0006	1.00028	0.997322	0.0732044	4.1943	-1.28208	-73.4579	1.35529	77.6522	0.213845	0.976868	-1.28208	-73.4579	0.284719	-0.958611	-0.016383	0.00325556	-0.980822	0.194905	2.94543	168.761	-0.0193477	0.999813	1.59015	91.1086	0.000274125	0.0165567	2.47685e+06	0.0173536	0.0173536	-0.0173487	-0.0173487	0.00504783	0.00504783	0.0050646
		372	1.00005	1.49605e+08	1.00009	1.0006	1.00028	-0.000251312	0.0167016	2.00088	0.000315535	0.000279005	0.0167034	9.28212e-07	1.00059	1.00028	0.994924	0.100803	5.77556	-1.26828	-72.6673	1.36909	78.4429	0.200345	0.979725	-1.26828	-72.6673	0.29792	-0.954591	-0.0164133	0.00309986	-0.982629	0.185582	2.95493	169.305	-0.0150455	0.999887	1.58584	90.8621	0.000274439	0.0165662	2.47827e+06	0.0173006	0.0173006	-0.0172956	-0.0172956	0.00519881	0.00519881	0.00521553
2016-04-04	94	373	1.00012	1.49616e+08	1.00024	1.0006	1.00028	-0.000179453	0.0167023	2.00087	0.000316056	0.000278997	0.0167032	6.11932e-07	1.00059	1.00028	0.996565	0.0829034	4.75001	-1.27723	-73.1801	1.36014	77.9301	0.209105	0.977893	-1.27723	-73.1801	0.289365	-0.957219	-0.0163705	0.00331704	-0.980083	0.198587	2.94168	168.546	-0.0107436	0.999942	1.58154	90.6156	0.000274123	0.0165567	2.47684e+06	0.017374	0.017374	-0.0173692	-0.0173692	0.00498797	0.00498797	0.00500476
		374	1.00019	1.49626e+08	1.00038	1.0006	1.00028	-0.000107632	0.0167029	2.00087	0.000316512	0.000279	0.0167033	2.63305e-07	1.0006	1.00028	0.998003	0.0632047	3.62136	-1.28708	-73.7444	1.35029	77.3658	0.218726	0.975786	-1.28708	-73.7444	0.279923	-0.960023	-0.0163221	0.00354835	-0.977175	0.212434	2.92753	167.735	-0.00644376	0.999979	1.57724	90.3692	0.000273774	0.0165461	2.47527e+06	0.0174493	0.0174493	-0.0174447	-0.0174447	0.00476198	0.00476198	0.00477884
		375	1.00026	1.49637e+08	1.00052	1.0006	1.00028	-3.58107e-05	0.016703	2.00087	0.000315675	0.000278991	0.016703	5.71269e-07	1.00059	1.00028	0.995365	0.0963139	5.51838	-1.27053	-72.7959	1.36684	78.3143	0.202543	0.979273	-1.27053	-72.7959	0.295776	-0.955257	-0.016364	0.00334801	-0.979705	0.200443	2.93978	168.437	-0.00214396	0.999998	1.57294	90.1228	0.000274082	0.0165554	2.47666e+06	0.0173841	0.0173841	-0.0173793	-0.0173793	0.0049577	0.0049577	0.0049745
		376	1.00033	1.49648e+08	1.00067	1.0006	1.00028	3.59607e-05	0.016703	2.00088	0.000314949	0.000278993	0.0167031	9.34401e-07	1.00059	1.00028	0.993075	0.11775	6.74658	-1.25981	-72.1818	1.37756	78.9284	0.192036	0.981388	-1.25981	-72.1818	0.305998	-0.952032	-0.0163853	0.00324287	-0.980972	0.194148	2.9462	168.805	0.00215294	0.999998	1.56864	89.8766	0.000274445	0.0165664	2.4783e+06	0.017349	0.017349	-0.0173442	-0.0173442	0.00506002	0.00506002	0.00507678
2016-04-05	95	377	1.00041	1.49659e+08	1.00081	1.0006	1.00028	0.000107732	0.0167025	2.00088	0.000315427	0.000278985	0.0167028	7.05367e-07	1.00059	1.00028	0.994585	0.104116	5.96542	-1.26663	-72.5724	1.37074	78.5378	0.198722	0.980056	-1.26663	-72.5724	0.299501	-0.954096	-0.016348	0.00342473	-0.978754	0.205039	2.93509	168.168	0.00644993	0.999979	1.56435	89.6304	0.000274216	0.0165595	2.47726e+06	0.017409	0.017409	-0.0174043	-0.0174043	0.00488275	0.00488275	0.00489958
		378	1.00048	1.49669e+08	1.00095	1.0006	1.00028	0.000179491	0.0167019	2.00087	0.000315891	0.000278987	0.0167029	4.68977e-07	1.00059	1.00028	0.996048	0.0889366	5.09569	-1.27422	-73.0072	1.36315	78.1029	0.206154	0.97852	-1.27422	-73.0072	0.292251	-0.956342	-0.0163062	0.00361881	-0.976248	0.216657	2.9232	167.487	0.0107461	0.999942	1.56005	89.3843	0.00027398	0.0165523	2.47619e+06	0.0174712	0.0174712	-0.0174666	-0.0174666	0.0046926	0.0046926	0.00470949
		379	1.00055	1.4968e+08	1.0011	1.0006	1.00028	0.00025125	0.0167008	2.00088	0.000315161	0.000278979	0.0167027	8.40003e-07	1.00059	1.00028	0.993745	0.111906	6.41174	-1.26273	-72.3492	1.37464	78.761	0.194903	0.980823	-1.26273	-72.3492	0.303215	-0.952922	-0.0163315	0.00350146	-0.97778	0.209635	2.93039	167.899	0.0150425	0.999887	1.55575	89.1381	0.000274351	0.0165635	2.47787e+06	0.0174337	0.0174337	-0.017429	-0.017429	0.00480762	0.00480762	0.00482447
		380	1.00062	1.49691e+08	1.00124	1.0006	1.00028	0.000323059	0.0166996	2.00088	0.000314341	0.000278982	0.0167027	1.16618e-06	1.00059	1.00028	0.99116	0.133068	7.62424	-1.25215	-71.743	1.38522	79.3672	0.184514	0.98283	-1.25215	-71.743	0.31328	-0.949661	-0.0163533	0.00339882	-0.979077	0.203489	2.93667	168.259	0.0193417	0.999813	1.55145	88.8917	0.000274677	0.0165734	2.47934e+06	0.0174005	0.0174005	-0.0173957	-0.0173957	0.004908	0.004908	0.00492482
2016-04-06	96	381	1.00069	1.49701e+08	1.00138	1.0006	1.00028	0.000394867	0.0166979	2.00088	0.000314726	0.000278975	0.0167025	9.00199e-07	1.00059	1.00028	0.992373	0.123584	7.08083	-1.25689	-72.0147	1.38048	79.0955	0.189173	0.981944	-1.25689	-72.0147	0.308773	-0.951136	-0.0163217	0.00354652	-0.977197	0.212334	2.92763	167.741	0.0236412	0.999721	1.54715	88.6453	0.000274411	0.0165654	2.47814e+06	0.017448	0.017448	-0.0174433	-0.0174433	0.0047634	0.0047634	0.00478026
		382	1.00076	1.49712e+08	1.00153	1.0006	1.00028	0.000466651	0.0166961	2.00087	0.000315071	0.000278978	0.0167026	6.14356e-07	1.00059	1.00028	0.993462	0.114415	6.55552	-1.26148	-72.2773	1.37589	78.8328	0.193672	0.981066	-1.26148	-72.2773	0.30441	-0.952541	-0.0162896	0.00369138	-0.975272	0.221006	2.91875	167.232	0.0279388	0.99961	1.54285	88.399	0.000274125	0.0165567	2.47685e+06	0.0174935	0.0174935	-0.017489	-0.017489	0.00462105	0.00462105	0.00463796
		383	1.00084	1.49723e+08	1.00167	1.00059	1.00028	0.000538435	0.0166937	2.00088	0.000314148	0.00027897	0.0167024	9.72816e-07	1.00059	1.00028	0.990552	0.137572	7.88227	-1.2499	-71.6139	1.38747	79.4962	0.1823	0.983243	-1.2499	-71.6139	0.315418	-0.948953	-0.0163158	0.00357268	-0.976855	0.213902	2.92602	167.649	0.032237	0.99948	1.53855	88.1526	0.000274484	0.0165676	2.47847e+06	0.0174561	0.0174561	-0.0174515	-0.0174515	0.00473766	0.00473766	0.00475453
		384	1.00091	1.49734e+08	1.00182	1.00059	1.00028	0.000610206	0.0166913	2.00088	0.000313261	0.000278973	0.0167025	1.34893e-06	1.00059	1.00028	0.987753	0.156663	8.97613	-1.24035	-71.067	1.39702	80.0431	0.172907	0.984938	-1.24035	-71.067	0.324462	-0.945899	-0.0163344	0.00348705	-0.977964	0.208775	2.93127	167.949	0.0365339	0.999332	1.53425	87.9063	0.00027486	0.0165789	2.48017e+06	0.0174289	0.0174289	-0.0174242	-0.0174242	0.00482163	0.00482163	0.00483847
2016-04-07	97	385	1.00098	1.49744e+08	1.00196	1.00059	1.00028	0.000681978	0.0166883	2.00088	0.000313629	0.000278965	0.0167022	1.10747e-06	1.00059	1.00028	0.988914	0.149038	8.53923	-1.24417	-71.2855	1.3932	79.8247	0.17666	0.984272	-1.24417	-71.2855	0.320853	-0.947129	-0.0163054	0.00361942	-0.976238	0.216702	2.92316	167.485	0.0408315	0.999166	1.52995	87.6599	0.000274618	0.0165716	2.47908e+06	0.0174707	0.0174707	-0.0174662	-0.0174662	0.00469168	0.00469168	0.00470856
		386	1.00105	1.49755e+08	1.0021	1.00059	1.00028	0.000753699	0.0166853	2.00088	0.000313908	0.000278967	0.0167023	8.21118e-07	1.00059	1.00028	0.989792	0.143005	8.1936	-1.24718	-71.4583	1.39019	79.6519	0.179628	0.983735	-1.24718	-71.4583	0.317995	-0.948092	-0.0162785	0.00373859	-0.974627	0.223837	2.91584	167.066	0.0451254	0.998981	1.52566	87.4136	0.000274332	0.016563	2.47779e+06	0.0175077	0.0175077	-0.0175033	-0.0175033	0.00457435	0.00457435	0.00459127
		387	1.00112	1.49766e+08	1.00225	1.00059	1.00028	0.00082542	0.0166817	2.00088	0.000312942	0.000278959	0.0167021	1.16678e-06	1.00059	1.00028	0.986749	0.162974	9.33773	-1.2372	-70.8862	1.40017	80.2239	0.169798	0.985479	-1.2372	-70.8862	0.327445	-0.94487	-0.0162993	0.00364594	-0.975883	0.218293	2.92153	167.391	0.0494202	0.998778	1.52136	87.1673	0.000274678	0.0165734	2.47935e+06	0.0174788	0.0174788	-0.0174743	-0.0174743	0.00466551	0.00466551	0.0046824
		388	1.00119	1.49776e+08	1.00239	1.00059	1.00028	0.000897166	0.016678	2.00088	0.000311938	0.000278961	0.0167021	1.49261e-06	1.00059	1.00028	0.983581	0.181463	10.397	-1.22795	-70.3566	1.40942	80.7536	0.16068	0.987006	-1.22795	-70.3566	0.336166	-0.941803	-0.0163171	0.00356534	-0.97695	0.213466	2.92647	167.674	0.0537157	0.998556	1.51705	86.9208	0.000275004	0.0165832	2.48082e+06	0.0174535	0.0174535	-0.0174489	-0.0174489	0.00474473	0.00474473	0.0047616
2016-04-08	98	389	1.00127	1.49787e+08	1.00253	1.00059	1.00028	0.000968912	0.0166738	2.00088	0.000312112	0.000278954	0.0167019	1.23902e-06	1.00059	1.00028	0.984131	0.178386	10.2208	-1.22949	-70.4447	1.40788	80.6655	0.162199	0.986758	-1.22949	-70.4447	0.334716	-0.942319	-0.0162958	0.00366055	-0.975687	0.219169	2.92063	167.34	0.0580121	0.998316	1.51275	86.6743	0.00027475	0.0165756	2.47967e+06	0.0174832	0.0174832	-0.0174787	-0.0174787	0.00465106	0.00465106	0.00466796
		390	1.00134	1.49798e+08	1.00267	1.00059	1.00028	0.00104057	0.0166696	2.00088	0.000312122	0.000278957	0.016702	9.02964e-07	1.00059	1.00028	0.984162	0.178214	10.2109	-1.22958	-70.4496	1.40779	80.6605	0.162283	0.986744	-1.22958	-70.4496	0.334636	-0.942348	-0.0162797	0.00373197	-0.974717	0.223444	2.91625	167.089	0.0623022	0.998057	1.50845	86.428	0.000274414	0.0165654	2.47816e+06	0.0175054	0.0175054	-0.017501	-0.017501	0.00458073	0.00458073	0.00459765
		391	1.00141	1.49809e+08	1.00282	1.00059	1.00028	0.00111223	0.0166647	2.00088	0.000310863	0.000278949	0.0167018	1.21123e-06	1.00059	1.00028	0.980194	0.199359	11.4224	-1.21901	-69.8439	1.41836	81.2663	0.151842	0.988405	-1.21901	-69.8439	0.34458	-0.938757	-0.0163026	0.00362974	-0.976099	0.217326	2.92252	167.448	0.0665935	0.99778	1.50415	86.1816	0.000274722	0.0165747	2.47955e+06	0.0174735	0.0174735	-0.0174689	-0.0174689	0.0046813	0.0046813	0.00469819
		392	1.00148	1.49819e+08	1.00296	1.00059	1.00028	0.00118384	0.0166598	2.00088	0.000309715	0.000278951	0.0167018	1.57461e-06	1.00059	1.00028	0.976573	0.216883	12.4265	-1.21024	-69.3418	1.42713	81.7683	0.143176	0.989697	-1.21024	-69.3418	0.352792	-0.935702	-0.0163187	0.00355693	-0.97706	0.212966	2.92698	167.704	0.0708807	0.997485	1.49986	85.9354	0.000275086	0.0165857	2.48119e+06	0.0174506	0.0174506	-0.017446	-0.017446	0.00475284	0.00475284	0.00476971
2016-04-09	99	393	1.00155	1.4983e+08	1.0031	1.00059	1.00028	0.00125545	0.0166544	2.00088	0.000309772	0.000278944	0.0167016	1.34585e-06	1.00059	1.00028	0.976751	0.216055	12.379	-1.21066	-69.3656	1.42671	81.7446	0.143586	0.989638	-1.21066	-69.3656	0.352404	-0.935848	-0.0163015	0.00363377	-0.976045	0.21757	2.92227	167.434	0.0751691	0.997171	1.49556	85.6891	0.000274857	0.0165788	2.48015e+06	0.0174746	0.0174746	-0.0174701	-0.0174701	0.00467726	0.00467726	0.00469415
		394	1.00162	1.49841e+08	1.00325	1.00059	1.00028	0.00132703	0.0166489	2.00088	0.000309788	0.000278947	0.0167017	1.0972e-06	1.00059	1.00028	0.976803	0.215811	12.3651	-1.21078	-69.3725	1.42659	81.7376	0.143706	0.98962	-1.21078	-69.3725	0.35229	-0.935891	-0.0162854	0.00370581	-0.975073	0.221882	2.91785	167.18	0.0794547	0.996838	1.49126	85.4428	0.000274608	0.0165713	2.47903e+06	0.0174971	0.0174971	-0.0174926	-0.0174926	0.00460638	0.00460638	0.00462329
		395	1.00169	1.49851e+08	1.00339	1.00059	1.00028	0.00139861	0.0166428	2.00088	0.000308635	0.00027894	0.0167015	1.44373e-06	1.00059	1.00028	0.973166	0.232183	13.3031	-1.20259	-68.9035	1.43478	82.2066	0.135601	0.990764	-1.20259	-68.9035	0.359939	-0.932976	-0.0162995	0.00364248	-0.975928	0.218093	2.92173	167.403	0.0837417	0.996487	1.48696	85.1963	0.000274955	0.0165818	2.4806e+06	0.0174772	0.0174772	-0.0174727	-0.0174727	0.00466864	0.00466864	0.00468553
		396	1.00176	1.49862e+08	1.00353	1.00059	1.00028	0.00147013	0.0166368	2.00088	0.000307616	0.000278944	0.0167016	1.85783e-06	1.00059	1.00028	0.969956	0.245748	14.0803	-1.19581	-68.5149	1.44156	82.5952	0.128878	0.99166	-1.19581	-68.5149	0.366259	-0.930513	-0.0163086	0.00360199	-0.976467	0.215667	2.92422	167.545	0.0880234	0.996118	1.48266	84.9501	0.000275369	0.0165942	2.48246e+06	0.0174646	0.0174646	-0.0174601	-0.0174601	0.0047085	0.0047085	0.00472538
2016-04-10	100	397	1.00184	1.49873e+08	1.00368	1.00059	1.00028	0.00154165	0.0166301	2.00088	0.000307905	0.000278937	0.0167014	1.62898e-06	1.00059	1.00028	0.970864	0.241986	13.8648	-1.19769	-68.6227	1.43968	82.4875	0.130743	0.991416	-1.19769	-68.6227	0.364508	-0.9312	-0.0162858	0.00370269	-0.975115	0.221699	2.91804	167.191	0.0923069	0.995731	1.47836	84.7037	0.00027514	0.0165873	2.48143e+06	0.0174958	0.0174958	-0.0174913	-0.0174913	0.0046093	0.0046093	0.00462621
		398	1.00191	1.49883e+08	1.00382	1.00059	1.00028	0.00161309	0.0166234	2.00088	0.000308027	0.000278939	0.0167015	1.31763e-06	1.00059	1.00028	0.971251	0.240364	13.7718	-1.1985	-68.6692	1.43887	82.441	0.131547	0.99131	-1.1985	-68.6692	0.363752	-0.931496	-0.0162667	0.00378583	-0.97397	0.226676	2.91293	166.899	0.0965836	0.995325	1.47406	84.4575	0.000274829	0.016578	2.48003e+06	0.0175213	0.0175213	-0.0175169	-0.0175169	0.00452729	0.00452729	0.00454423
		399	1.00198	1.49894e+08	1.00396	1.00059	1.00029	0.00168452	0.016616	2.00088	0.000306808	0.000278929	0.0167012	1.68749e-06	1.00059	1.00028	0.967407	0.256013	14.6685	-1.19068	-68.2209	1.44669	82.8893	0.123787	0.992309	-1.19068	-68.2209	0.37103	-0.928621	-0.0162797	0.0037284	-0.974763	0.223242	2.91645	167.1	0.100862	0.9949	1.46976	84.2112	0.000275199	0.0165891	2.4817e+06	0.0175035	0.0175035	-0.0174991	-0.0174991	0.00458384	0.00458384	0.00460076
		400	1.00205	1.49905e+08	1.0041	1.00059	1.00029	0.00175595	0.0166086	2.00088	0.000305599	0.00027893	0.0167012	2.06251e-06	1.00059	1.00028	0.963595	0.270659	15.5076	-1.18336	-67.8013	1.45401	83.3089	0.116517	0.993189	-1.18336	-67.8013	0.37782	-0.925879	-0.0162909	0.00367918	-0.975434	0.220294	2.91948	167.274	0.105139	0.994457	1.46546	83.9648	0.000275574	0.0166004	2.48339e+06	0.0174883	0.0174883	-0.0174838	-0.0174838	0.00463237	0.00463237	0.00464927
2016-04-11	101	401	1.00212	1.49915e+08	1.00425	1.00059	1.00029	0.00182739	0.0166007	2.00088	0.000305544	0.000278922	0.016701	1.87085e-06	1.00059	1.00028	0.963421	0.27131	15.5449	-1.18303	-67.7826	1.45434	83.3276	0.116193	0.993227	-1.18303	-67.7826	0.378122	-0.925756	-0.0162759	0.00374389	-0.97455	0.224172	2.9155	167.046	0.109418	0.993996	1.46116	83.7182	0.000275382	0.0165946	2.48252e+06	0.017508	0.017508	-0.0175036	-0.0175036	0.00456845	0.00456845	0.00458537
		402	1.00219	1.49926e+08	1.00439	1.00059	1.00029	0.00189872	0.0165927	2.00088	0.000305298	0.000278924	0.016701	1.58412e-06	1.00059	1.00028	0.962646	0.274186	15.7097	-1.18159	-67.7002	1.45578	83.4099	0.114765	0.993393	-1.18159	-67.7002	0.379452	-0.925211	-0.0162652	0.00379044	-0.973904	0.226958	2.91264	166.882	0.113689	0.993516	1.45686	83.472	0.000275095	0.016586	2.48123e+06	0.0175223	0.0175223	-0.0175179	-0.0175179	0.00452252	0.00452252	0.00453945
		403	1.00226	1.49936e+08	1.00453	1.00059	1.00029	0.00197005	0.0165842	2.00088	0.000303882	0.000278917	0.0167008	1.8926e-06	1.00059	1.00028	0.958182	0.290217	16.6282	-1.17358	-67.241	1.46379	83.8692	0.106799	0.994281	-1.17358	-67.241	0.386856	-0.92214	-0.0162789	0.00372996	-0.974741	0.22334	2.91635	167.095	0.117962	0.993018	1.45256	83.2255	0.000275404	0.0165953	2.48262e+06	0.0175036	0.0175036	-0.0174992	-0.0174992	0.00458212	0.00458212	0.00459904
		404	1.00233	1.49947e+08	1.00467	1.00059	1.00029	0.00204131	0.0165757	2.00088	0.000302627	0.000278919	0.0167009	2.28111e-06	1.00059	1.00029	0.954222	0.30375	17.4036	-1.16681	-66.8533	1.47056	84.2569	0.100069	0.994981	-1.16681	-66.8533	0.393087	-0.919501	-0.0162882	0.00368977	-0.975289	0.220933	2.91882	167.236	0.122228	0.992502	1.44826	82.9793	0.000275792	0.016607	2.48437e+06	0.0174913	0.0174913	-0.0174868	-0.0174868	0.00462178	0.00462178	0.00463868
2016-04-12	102	405	1.0024	1.49958e+08	1.00482	1.00059	1.00029	0.00211257	0.0165665	2.00088	0.000302575	0.000278913	0.0167007	2.07753e-06	1.00059	1.00029	0.954059	0.304292	17.4347	-1.16654	-66.8378	1.47083	84.2724	0.0997988	0.995008	-1.16654	-66.8378	0.393336	-0.919395	-0.016273	0.00375534	-0.974391	0.224862	2.91479	167.005	0.126496	0.991967	1.44396	82.7328	0.000275589	0.0166009	2.48345e+06	0.0175113	0.0175113	-0.0175068	-0.0175068	0.00455701	0.00455701	0.00457394
		406	1.00248	1.49968e+08	1.00496	1.00059	1.00029	0.00218375	0.0165574	2.00088	0.000302383	0.000278916	0.0167008	1.80392e-06	1.00059	1.00029	0.953454	0.306305	17.55	-1.16553	-66.7801	1.47184	84.3301	0.0987974	0.995108	-1.16553	-66.7801	0.394261	-0.918998	-0.0162606	0.00380889	-0.973645	0.228067	2.9115	166.817	0.130757	0.991414	1.43966	82.4866	0.000275315	0.0165926	2.48222e+06	0.0175276	0.0175276	-0.0175233	-0.0175233	0.00450415	0.00450415	0.00452109
		407	1.00255	1.49979e+08	1.0051	1.00059	1.00029	0.00225493	0.0165476	2.00088	0.000300923	0.000278908	0.0167005	2.17471e-06	1.00059	1.00029	0.948849	0.321225	18.4048	-1.15807	-66.3527	1.4793	84.7575	0.0913712	0.995817	-1.15807	-66.3527	0.401106	-0.916032	-0.0162724	0.00375748	-0.974361	0.224991	2.91466	166.998	0.135022	0.990843	1.43536	82.2401	0.000275686	0.0166038	2.48389e+06	0.0175118	0.0175118	-0.0175074	-0.0175074	0.00455484	0.00455484	0.00457176
		408	1.00262	1.49989e+08	1.00524	1.00059	1.00029	0.00232605	0.0165378	2.00088	0.000299597	0.00027891	0.0167006	2.61303e-06	1.00059	1.00029	0.944669	0.334212	19.1489	-1.15158	-65.9806	1.48579	85.1296	0.0849031	0.996389	-1.15158	-65.9806	0.407046	-0.913408	-0.0162806	0.00372177	-0.974852	0.222852	2.91685	167.123	0.13928	0.990253	1.43106	81.9938	0.000276124	0.016617	2.48586e+06	0.0175009	0.0175009	-0.0174965	-0.0174965	0.00459011	0.00459011	0.00460702
2016-04-13	103	409	1.00269	1.5e+08	1.00538	1.00059	1.00029	0.00239717	0.0165275	2.00088	0.00029945	0.000278904	0.0167004	2.47199e-06	1.00059	1.00029	0.944206	0.33562	19.2296	-1.15087	-65.9403	1.4865	85.1699	0.0842014	0.996449	-1.15087	-65.9403	0.407689	-0.913121	-0.0162669	0.0037803	-0.974044	0.22636	2.91325	166.917	0.14354	0.989645	1.42676	81.7473	0.000275983	0.0166127	2.48523e+06	0.0175186	0.0175186	-0.0175142	-0.0175142	0.00453224	0.00453224	0.00454917
		410	1.00276	1.50011e+08	1.00553	1.00059	1.00029	0.00246819	0.0165171	2.00088	0.000299113	0.000278907	0.0167005	2.23585e-06	1.00059	1.00029	0.943142	0.338836	19.4139	-1.14927	-65.8481	1.4881	85.262	0.0825991	0.996583	-1.14927	-65.8481	0.409156	-0.912464	-0.0162568	0.00382406	-0.973431	0.228979	2.91056	166.763	0.147792	0.989019	1.42246	81.501	0.000275747	0.0166056	2.48417e+06	0.0175319	0.0175319	-0.0175276	-0.0175276	0.00448902	0.00448902	0.00450596
		411	1.00283	1.50021e+08	1.00567	1.00059	1.00029	0.00253921	0.0165061	2.00088	0.000297556	0.0002789	0.0167003	2.61953e-06	1.00059	1.00029	0.938233	0.353309	20.2431	-1.14203	-65.4335	1.49534	85.6766	0.0753851	0.997154	-1.14203	-65.4335	0.415749	-0.909479	-0.0162678	0.00377631	-0.974099	0.226122	2.9135	166.931	0.152046	0.988373	1.41816	81.2545	0.000276131	0.0166172	2.48589e+06	0.0175173	0.0175173	-0.0175129	-0.0175129	0.00453613	0.00453613	0.00455306
		412	1.0029	1.50032e+08	1.00581	1.00059	1.00029	0.00261016	0.0164952	2.00088	0.000296158	0.000278903	0.0167004	3.08321e-06	1.00058	1.00029	0.933826	0.365832	20.9606	-1.13577	-65.0748	1.5016	86.0354	0.0691401	0.997607	-1.13577	-65.0748	0.421435	-0.906858	-0.0162752	0.00374439	-0.974541	0.22421	2.91546	167.044	0.156293	0.987711	1.41386	81.0082	0.000276594	0.0166311	2.48798e+06	0.0175076	0.0175076	-0.0175032	-0.0175032	0.00456769	0.00456769	0.00458461
2016-04-14	104	413	1.00297	1.50042e+08	1.00595	1.00059	1.00029	0.0026811	0.0164836	2.00088	0.000296016	0.000278896	0.0167002	2.92944e-06	1.00058	1.00029	0.933377	0.367086	21.0325	-1.13514	-65.0389	1.50223	86.0713	0.0685148	0.99765	-1.13514	-65.0389	0.422004	-0.906594	-0.0162611	0.00380417	-0.97371	0.227792	2.91178	166.833	0.160543	0.987029	1.40956	80.7616	0.00027644	0.0166265	2.48729e+06	0.0175256	0.0175256	-0.0175212	-0.0175212	0.00450853	0.00450853	0.00452547
		414	1.00304	1.50053e+08	1.00609	1.00059	1.00029	0.0027519	0.016472	2.00088	0.000295582	0.000278899	0.0167003	2.63037e-06	1.00058	1.00029	0.93201	0.370876	21.2496	-1.13325	-64.9303	1.50412	86.1799	0.0666238	0.997778	-1.13325	-64.9303	0.423721	-0.905793	-0.016252	0.00384321	-0.97316	0.230129	2.90938	166.695	0.164782	0.98633	1.40526	80.5154	0.000276141	0.0166175	2.48594e+06	0.0175374	0.0175374	-0.0175331	-0.0175331	0.00446994	0.00446994	0.00448689
		415	1.00311	1.50063e+08	1.00623	1.00059	1.00029	0.00282269	0.0164597	2.00088	0.00029388	0.00027889	0.0167	2.97576e-06	1.00058	1.00029	0.926642	0.385416	22.0827	-1.12598	-64.5137	1.51139	86.5964	0.0593684	0.998236	-1.12598	-64.5137	0.430295	-0.902688	-0.0162631	0.0037949	-0.973839	0.227239	2.91235	166.865	0.169023	0.985612	1.40096	80.269	0.000276487	0.0166279	2.4875e+06	0.0175226	0.0175226	-0.0175183	-0.0175183	0.00451761	0.00451761	0.00453454
		416	1.00318	1.50074e+08	1.00637	1.00059	1.00029	0.0028934	0.0164475	2.00088	0.000292362	0.000278892	0.0167001	3.41358e-06	1.00058	1.00029	0.921855	0.397956	22.8012	-1.11971	-64.1545	1.51766	86.9557	0.0531084	0.998589	-1.11971	-64.1545	0.435946	-0.899973	-0.0162706	0.00376282	-0.974285	0.225318	2.91432	166.978	0.173257	0.984877	1.39666	80.0228	0.000276925	0.0166411	2.48947e+06	0.0175129	0.0175129	-0.0175085	-0.0175085	0.00454933	0.00454933	0.00456625
2016-04-15	105	417	1.00325	1.50084e+08	1.00651	1.00059	1.00029	0.00296411	0.0164347	2.00088	0.000292022	0.000278884	0.0166998	3.27209e-06	1.00058	1.00029	0.920784	0.40071	22.959	-1.11833	-64.0756	1.51904	87.0346	0.0517333	0.998661	-1.11833	-64.0756	0.437185	-0.899372	-0.0162593	0.00381036	-0.973622	0.228167	2.9114	166.811	0.177493	0.984122	1.39236	79.7762	0.000276783	0.0166368	2.48883e+06	0.0175271	0.0175271	-0.0175228	-0.0175228	0.00450224	0.00450224	0.00451918
		418	1.00332	1.50095e+08	1.00666	1.00059	1.00029	0.00303471	0.0164219	2.00088	0.000291491	0.000278887	0.0166999	3.03543e-06	1.00058	1.00029	0.919111	0.404977	23.2035	-1.1162	-63.9533	1.52117	87.1568	0.0496024	0.998769	-1.1162	-63.9533	0.439103	-0.898437	-0.0162511	0.00384554	-0.973126	0.230273	2.90923	166.687	0.18172	0.98335	1.38806	79.53	0.000276546	0.0166297	2.48777e+06	0.0175378	0.0175378	-0.0175335	-0.0175335	0.00446746	0.00446746	0.00448441
		419	1.00339	1.50105e+08	1.0068	1.00059	1.0003	0.00310532	0.0164084	2.00088	0.00028979	0.00027888	0.0166997	3.39408e-06	1.00058	1.00029	0.913747	0.418383	23.9716	-1.10949	-63.5693	1.52788	87.5409	0.0429066	0.999079	-1.10949	-63.5693	0.445115	-0.895473	-0.0162601	0.00380649	-0.973676	0.227938	2.91163	166.824	0.185951	0.982559	1.38376	79.2834	0.000276905	0.0166405	2.48938e+06	0.0175258	0.0175258	-0.0175215	-0.0175215	0.00450599	0.00450599	0.00452293
		420	1.00346	1.50116e+08	1.00694	1.00058	1.0003	0.00317584	0.016395	2.00088	0.000288273	0.000278883	0.0166998	3.84514e-06	1.00058	1.00029	0.908963	0.430006	24.6375	-1.10368	-63.2363	1.53369	87.8738	0.0370998	0.999312	-1.10368	-63.2363	0.450312	-0.892871	-0.0162659	0.0037819	-0.974019	0.226464	2.91315	166.911	0.190172	0.981751	1.37946	79.0372	0.000277356	0.016654	2.4914e+06	0.0175185	0.0175185	-0.0175141	-0.0175141	0.00453034	0.00453034	0.00454727
2016-04-16	106	421	1.00353	1.50126e+08	1.00708	1.00058	1.0003	0.00324636	0.016381	2.00088	0.000287934	0.000278877	0.0166996	3.71692e-06	1.00058	1.00029	0.907895	0.432561	24.7839	-1.1024	-63.1631	1.53497	87.947	0.0358232	0.999358	-1.1024	-63.1631	0.451452	-0.892295	-0.0162542	0.00383109	-0.973329	0.229412	2.91012	166.738	0.194397	0.980923	1.37515	78.7905	0.000277228	0.0166502	2.49083e+06	0.0175332	0.0175332	-0.0175288	-0.0175288	0.00448161	0.00448161	0.00449856
		422	1.0036	1.50137e+08	1.00722	1.00058	1.0003	0.00331672	0.016367	2.00088	0.000287304	0.000278881	0.0166997	3.44333e-06	1.00058	1.00029	0.905908	0.437278	25.0542	-1.10005	-63.028	1.53732	88.0822	0.0334663	0.99944	-1.10005	-63.028	0.453555	-0.891228	-0.0162469	0.00386261	-0.972883	0.231298	2.90818	166.626	0.19861	0.980079	1.37086	78.5443	0.000276954	0.0166419	2.4896e+06	0.0175427	0.0175427	-0.0175384	-0.0175384	0.00445046	0.00445046	0.00446742
		423	1.00367	1.50147e+08	1.00736	1.00058	1.0003	0.00338709	0.0163524	2.00088	0.000285405	0.000278873	0.0166995	3.81427e-06	1.00058	1.00029	0.899918	0.451214	25.8526	-1.09308	-62.6288	1.54429	88.4814	0.0265013	0.999649	-1.09308	-62.6288	0.459754	-0.888046	-0.0162569	0.00381926	-0.973496	0.228705	2.91085	166.779	0.202826	0.979215	1.36655	78.2977	0.000277325	0.0166531	2.49127e+06	0.0175295	0.0175295	-0.0175251	-0.0175251	0.00449326	0.00449326	0.00451021
		424	1.00374	1.50158e+08	1.0075	1.00058	1.0003	0.00345736	0.0163378	2.00088	0.000283714	0.000278876	0.0166996	4.29005e-06	1.00058	1.0003	0.894588	0.463289	26.5445	-1.08704	-62.2828	1.55033	88.8273	0.0204654	0.999791	-1.08704	-62.2828	0.465107	-0.885254	-0.0162636	0.003791	-0.973892	0.227012	2.91258	166.879	0.207033	0.978334	1.36226	78.0515	0.000277801	0.0166674	2.4934e+06	0.017521	0.017521	-0.0175167	-0.0175167	0.00452125	0.00452125	0.00453818
2016-04-17	107	425	1.00381	1.50168e+08	1.00764	1.00058	1.0003	0.00352763	0.0163225	2.00088	0.000283252	0.000278869	0.0166994	4.16118e-06	1.00058	1.0003	0.893132	0.466536	26.7305	-1.08542	-62.1898	1.55195	88.9203	0.0188425	0.999822	-1.08542	-62.1898	0.466544	-0.884498	-0.0162532	0.00383456	-0.97328	0.229623	2.9099	166.725	0.211243	0.977433	1.35795	77.8048	0.000277672	0.0166635	2.49282e+06	0.017534	0.017534	-0.0175296	-0.0175296	0.00447806	0.00447806	0.00449501
		426	1.00388	1.50179e+08	1.00778	1.00058	1.0003	0.00359777	0.0163073	2.00088	0.000282549	0.000278871	0.0166994	3.912e-06	1.00058	1.0003	0.890915	0.471441	27.0116	-1.08296	-62.0493	1.55441	89.0609	0.01639	0.999866	-1.08296	-62.0493	0.468712	-0.883351	-0.0162461	0.00386457	-0.972854	0.231419	2.90806	166.619	0.215443	0.976516	1.35365	77.5585	0.000277423	0.016656	2.49171e+06	0.017543	0.017543	-0.0175387	-0.0175387	0.00444839	0.00444839	0.00446534
		427	1.00395	1.50189e+08	1.00792	1.00058	1.0003	0.00366792	0.0162914	2.00088	0.000280601	0.000278863	0.0166992	4.29509e-06	1.00058	1.0003	0.884772	0.484792	27.7765	-1.07629	-61.6668	1.56108	89.4433	0.0097154	0.999953	-1.07629	-61.6668	0.474598	-0.880203	-0.016255	0.00382602	-0.9734	0.229114	2.91043	166.755	0.219646	0.97558	1.34934	77.3117	0.000277806	0.0166675	2.49342e+06	0.0175312	0.0175312	-0.0175269	-0.0175269	0.00448643	0.00448643	0.00450337
		428	1.00402	1.50199e+08	1.00806	1.00058	1.0003	0.00373795	0.0162755	2.00088	0.000278886	0.000278865	0.0166993	4.79546e-06	1.00058	1.0003	0.879366	0.496267	28.434	-1.07055	-61.3381	1.56682	89.7721	0.00397764	0.999992	-1.07055	-61.3381	0.479641	-0.877465	-0.0162605	0.00380266	-0.973728	0.227714	2.91186	166.837	0.223839	0.974626	1.34504	77.0654	0.000278306	0.0166825	2.49567e+06	0.0175242	0.0175242	-0.0175199	-0.0175199	0.00450957	0.00450957	0.0045265
2016-04-18	108	429	1.00409	1.5021e+08	1.0082	1.00058	1.0003	0.00380798	0.0162591	2.00088	0.00027835	0.000278858	0.016699	4.71663e-06	1.00058	1.0003	0.877674	0.499809	28.6369	-1.06878	-61.2366	1.56859	89.8735	0.002207	0.999998	-1.06878	-61.2366	0.481193	-0.876614	-0.0162506	0.00384385	-0.973147	0.230184	2.90933	166.692	0.228036	0.973653	1.34074	76.8186	0.000278228	0.0166802	2.49532e+06	0.0175364	0.0175364	-0.0175321	-0.0175321	0.00446871	0.00446871	0.00448565
		430	1.00416	1.5022e+08	1.00834	1.00058	1.0003	0.00387785	0.0162426	2.00088	0.000277496	0.00027886	0.0166991	4.47979e-06	1.00058	1.0003	0.874983	0.505396	28.9571	-1.06599	-61.0766	1.57138	90.0336	-0.000586733	1	-1.06599	-61.0766	0.483641	-0.875267	-0.0162449	0.00386831	-0.9728	0.231648	2.90782	166.606	0.232219	0.972664	1.33644	76.5723	0.000277991	0.0166731	2.49425e+06	0.0175438	0.0175438	-0.0175395	-0.0175395	0.00444451	0.00444451	0.00446147
		431	1.00423	1.5023e+08	1.00847	1.00058	1.0003	0.00394771	0.0162256	2.00088	0.000275496	0.000278854	0.0166989	4.82608e-06	1.00057	1.0003	0.868675	0.518274	29.6949	-1.05955	-60.7076	1.57782	90.4025	-0.00702571	0.999975	-1.05955	-60.7076	0.489266	-0.872134	-0.0162529	0.00383362	-0.973291	0.229573	2.90995	166.728	0.236405	0.971655	1.33213	76.3255	0.000278337	0.0166834	2.49581e+06	0.0175332	0.0175332	-0.0175289	-0.0175289	0.00447877	0.00447877	0.00449572
		432	1.0043	1.50241e+08	1.00861	1.00058	1.00031	0.00401747	0.0162085	2.00088	0.000273729	0.000278857	0.016699	5.28963e-06	1.00057	1.0003	0.863104	0.529413	30.3331	-1.05398	-60.3885	1.58339	90.7216	-0.0125947	0.999921	-1.05398	-60.3885	0.494116	-0.869396	-0.0162579	0.00381301	-0.973582	0.228337	2.91122	166.801	0.240581	0.970629	1.32783	76.0792	0.000278801	0.0166973	2.49788e+06	0.0175271	0.0175271	-0.0175228	-0.0175228	0.00449921	0.00449921	0.00451615
2016-04-19	109	433	1.00437	1.50251e+08	1.00875	1.00058	1.00031	0.00408722	0.0161909	2.00088	0.000273165	0.000278851	0.0166988	5.1613e-06	1.00057	1.0003	0.861326	0.532922	30.5342	-1.05222	-60.288	1.58515	90.8222	-0.0143494	0.999897	-1.05222	-60.288	0.495641	-0.868528	-0.0162479	0.00385447	-0.972996	0.230823	2.90867	166.654	0.244761	0.969583	1.32352	75.8323	0.000278672	0.0166935	2.49731e+06	0.0175394	0.0175394	-0.0175351	-0.0175351	0.00445809	0.00445809	0.00447504
		434	1.00444	1.50261e+08	1.00889	1.00058	1.00031	0.0041568	0.0161733	2.00088	0.000272259	0.000278854	0.0166989	4.86238e-06	1.00057	1.0003	0.858468	0.53852	30.8549	-1.04942	-60.1276	1.58795	90.9826	-0.017148	0.999853	-1.04942	-60.1276	0.49807	-0.867137	-0.0162422	0.00387885	-0.972649	0.232282	2.90717	166.569	0.248926	0.968522	1.31922	75.586	0.000278373	0.0166845	2.49597e+06	0.0175468	0.0175468	-0.0175425	-0.0175425	0.00443398	0.00443398	0.00445094
		435	1.0045	1.50272e+08	1.00903	1.00058	1.00031	0.00422638	0.016155	2.00088	0.000270083	0.000278847	0.0166987	5.20812e-06	1.00057	1.0003	0.851606	0.551754	31.6132	-1.04281	-59.7485	1.59456	91.3617	-0.0237634	0.999718	-1.04281	-59.7485	0.503797	-0.863822	-0.0162509	0.00384129	-0.973182	0.230035	2.90948	166.701	0.253096	0.967441	1.31492	75.3392	0.000278719	0.0166949	2.49752e+06	0.0175353	0.0175353	-0.017531	-0.017531	0.00447107	0.00447107	0.00448802
		436	1.00457	1.50282e+08	1.00917	1.00058	1.00031	0.00429579	0.0161367	2.00089	0.000268264	0.000278848	0.0166987	5.73333e-06	1.00057	1.0003	0.845872	0.562598	32.2345	-1.03739	-59.4378	1.59998	91.6723	-0.0291836	0.999574	-1.03739	-59.4378	0.508473	-0.861078	-0.0162552	0.00382303	-0.97344	0.228941	2.9106	166.765	0.257252	0.966344	1.31062	75.0929	0.000279244	0.0167106	2.49987e+06	0.0175299	0.0175299	-0.0175255	-0.0175255	0.00448917	0.00448917	0.00450611
2016-04-20	110	437	1.00464	1.50292e+08	1.00931	1.00058	1.00031	0.00436519	0.0161179	2.00089	0.000267674	0.00027884	0.0166985	5.654e-06	1.00057	1.0003	0.844011	0.566078	32.4339	-1.03565	-59.3381	1.60172	91.772	-0.0309229	0.999522	-1.03565	-59.3381	0.50997	-0.860192	-0.0162451	0.00386469	-0.972849	0.231439	2.90804	166.618	0.261412	0.965227	1.30631	74.8461	0.000279165	0.0167082	2.49952e+06	0.0175422	0.0175422	-0.0175378	-0.0175378	0.0044478	0.0044478	0.00446476
		438	1.00471	1.50303e+08	1.00944	1.00058	1.00031	0.00443438	0.016099	2.00088	0.000266665	0.000278841	0.0166985	5.36635e-06	1.00057	1.0003	0.840831	0.571979	32.772	-1.0327	-59.1691	1.60467	91.9411	-0.0338719	0.999426	-1.0327	-59.1691	0.512506	-0.858683	-0.0162399	0.00388654	-0.972537	0.232747	2.90669	166.541	0.265555	0.964096	1.30202	74.6	0.000278877	0.0166996	2.49823e+06	0.0175487	0.0175487	-0.0175444	-0.0175444	0.00442617	0.00442617	0.00444313
		439	1.00478	1.50313e+08	1.00958	1.00057	1.00031	0.00450357	0.0160795	2.00089	0.000264485	0.000278833	0.0166983	5.6742e-06	1.00057	1.0003	0.833957	0.584557	33.4927	-1.02641	-58.8088	1.61096	92.3014	-0.0401564	0.999193	-1.02641	-58.8088	0.517896	-0.855443	-0.0162474	0.00385424	-0.972997	0.230817	2.90868	166.655	0.269703	0.962944	1.29771	74.3534	0.000279185	0.0167088	2.49961e+06	0.0175388	0.0175388	-0.0175345	-0.0175345	0.00445804	0.00445804	0.00447499
		440	1.00485	1.50323e+08	1.00972	1.00057	1.00031	0.00457265	0.01606	2.00089	0.000262538	0.000278834	0.0166983	6.09924e-06	1.00057	1.00031	0.827816	0.595593	34.125	-1.02089	-58.4926	1.61648	92.6176	-0.0456692	0.998957	-1.02089	-58.4926	0.522609	-0.852573	-0.0162521	0.00383443	-0.973278	0.22963	2.9099	166.725	0.273839	0.961776	1.29341	74.1072	0.00027961	0.0167216	2.50151e+06	0.0175329	0.0175329	-0.0175286	-0.0175286	0.00447767	0.00447767	0.00449461
2016-04-21	111	441	1.00492	1.50333e+08	1.00986	1.00057	1.00031	0.00464173	0.01604	2.00089	0.000261767	0.000278826	0.0166981	5.94519e-06	1.00057	1.00031	0.825388	0.599908	34.3722	-1.01873	-58.369	1.61864	92.7412	-0.0478244	0.998856	-1.01873	-58.369	0.524447	-0.851443	-0.0162436	0.00386932	-0.972782	0.231722	2.90775	166.602	0.27798	0.960587	1.28911	73.8603	0.000279456	0.0167169	2.50082e+06	0.0175431	0.0175431	-0.0175388	-0.0175388	0.00444302	0.00444302	0.00445997
		442	1.00498	1.50344e+08	1.00999	1.00057	1.00031	0.00471067	0.0160199	2.00089	0.00026073	0.000278828	0.0166982	5.65813e-06	1.00057	1.00031	0.822115	0.60568	34.7029	-1.01585	-58.2036	1.62152	92.9065	-0.0507068	0.998714	-1.01585	-58.2036	0.526902	-0.849926	-0.0162382	0.00389229	-0.972453	0.233097	2.90633	166.521	0.282107	0.959383	1.28481	73.614	0.000279169	0.0167084	2.49953e+06	0.01755	0.01755	-0.0175457	-0.0175457	0.00442027	0.00442027	0.00443723
		443	1.00505	1.50354e+08	1.01013	1.00057	1.00031	0.00477961	0.0159992	2.00089	0.000258471	0.000278821	0.0166979	5.99124e-06	1.00057	1.00031	0.814992	0.618081	35.4134	-1.00964	-57.8484	1.62773	93.2618	-0.0568985	0.99838	-1.00964	-57.8484	0.532162	-0.846643	-0.0162453	0.00386154	-0.972892	0.231258	2.90822	166.629	0.28624	0.958158	1.2805	73.367	0.000279502	0.0167183	2.50103e+06	0.0175406	0.0175406	-0.0175363	-0.0175363	0.00445064	0.00445064	0.00446759
		444	1.00512	1.50364e+08	1.01027	1.00057	1.00032	0.00484837	0.0159786	2.00089	0.000256593	0.000278822	0.016698	6.51618e-06	1.00057	1.00031	0.809073	0.628224	35.9946	-1.00457	-57.5578	1.6328	93.5524	-0.0619607	0.998079	-1.00457	-57.5578	0.536448	-0.843933	-0.0162483	0.00384901	-0.973071	0.230508	2.90899	166.673	0.290357	0.956918	1.2762	73.1207	0.000280027	0.016734	2.50337e+06	0.0175369	0.0175369	-0.0175326	-0.0175326	0.00446306	0.00446306	0.00448001
2016-04-22	112	445	1.00519	1.50374e+08	1.01041	1.00057	1.00032	0.00491712	0.0159573	2.00089	0.000255893	0.000278814	0.0166977	6.46207e-06	1.00056	1.00031	0.806865	0.631971	36.2093	-1.0027	-57.4505	1.63467	93.6597	-0.0638306	0.997961	-1.0027	-57.4505	0.538029	-0.842927	-0.0162386	0.00388853	-0.972506	0.232878	2.90656	166.533	0.294478	0.955658	1.27189	72.8737	0.000279973	0.0167324	2.50313e+06	0.0175485	0.0175485	-0.0175442	-0.0175442	0.0044238	0.0044238	0.00444076
		446	1.00526	1.50384e+08	1.01054	1.00057	1.00032	0.00498565	0.0159361	2.00089	0.000254749	0.000278815	0.0166978	6.18696e-06	1.00056	1.00031	0.803258	0.638052	36.5577	-0.999659	-57.2762	1.63771	93.8339	-0.0668648	0.997762	-0.999659	-57.2762	0.540589	-0.841287	-0.0162338	0.00390893	-0.972213	0.234099	2.9053	166.461	0.298582	0.954384	1.26759	72.6275	0.000279698	0.0167242	2.5019e+06	0.0175546	0.0175546	-0.0175503	-0.0175503	0.00440358	0.00440358	0.00442054
		447	1.00532	1.50394e+08	1.01068	1.00057	1.00032	0.00505417	0.0159142	2.00089	0.000252482	0.000278808	0.0166975	6.48287e-06	1.00056	1.00031	0.796108	0.649959	37.2399	-0.993705	-56.9351	1.64366	94.175	-0.0728039	0.997346	-0.993705	-56.9351	0.545588	-0.838053	-0.01624	0.00388214	-0.972597	0.232498	2.90695	166.556	0.30269	0.953089	1.26328	72.3808	0.000279994	0.016733	2.50322e+06	0.0175464	0.0175464	-0.0175421	-0.0175421	0.00443003	0.00443003	0.00444699
		448	1.00539	1.50405e+08	1.01081	1.00057	1.00032	0.00512258	0.0158924	2.00089	0.000250472	0.00027881	0.0166976	6.90834e-06	1.00056	1.00031	0.78977	0.660362	37.8359	-0.988504	-56.6371	1.64887	94.4731	-0.0779903	0.996954	-0.988504	-56.6371	0.54994	-0.835204	-0.0162435	0.00386752	-0.972806	0.231621	2.90785	166.607	0.306785	0.951779	1.25898	72.1344	0.000280419	0.0167457	2.50513e+06	0.0175421	0.0175421	-0.0175378	-0.0175378	0.00444455	0.00444455	0.00446151
2016-04-23	113	449	1.00546	1.50415e+08	1.01095	1.00057	1.00032	0.00519098	0.01587	2.00089	0.000249613	0.000278804	0.0166974	6.76752e-06	1.00056	1.00031	0.787062	0.664764	38.0882	-0.986303	-56.511	1.65107	94.5992	-0.0801845	0.99678	-0.986303	-56.511	0.551777	-0.833992	-0.0162352	0.00390174	-0.972315	0.233673	2.90574	166.487	0.310885	0.950448	1.25467	71.8874	0.000280279	0.0167415	2.5045e+06	0.0175521	0.0175521	-0.0175478	-0.0175478	0.00441055	0.00441055	0.00442751
		450	1.00553	1.50425e+08	1.01109	1.00057	1.00032	0.00525917	0.0158476	2.00089	0.000248335	0.000278807	0.0166975	6.4182e-06	1.00056	1.00031	0.783033	0.671268	38.4608	-0.983051	-56.3247	1.65432	94.7855	-0.0834258	0.996514	-0.983051	-56.3247	0.554486	-0.832193	-0.0162311	0.00391873	-0.97207	0.23469	2.90469	166.427	0.314967	0.949102	1.25037	71.6412	0.000279929	0.0167311	2.50293e+06	0.0175572	0.0175572	-0.0175529	-0.0175529	0.00439372	0.00439372	0.00441069
		451	1.00559	1.50435e+08	1.01122	1.00057	1.00032	0.00532736	0.0158246	2.00089	0.000245835	0.0002788	0.0166973	6.68917e-06	1.00056	1.00031	0.775151	0.683842	39.1813	-0.976764	-55.9645	1.66061	95.1457	-0.0896889	0.99597	-0.976764	-55.9645	0.559707	-0.828691	-0.0162387	0.00388659	-0.972532	0.232768	2.90667	166.54	0.319055	0.947736	1.24606	71.3942	0.0002802	0.0167392	2.50415e+06	0.0175475	0.0175475	-0.0175432	-0.0175432	0.0044255	0.0044255	0.00444246
		452	1.00566	1.50445e+08	1.01136	1.00057	1.00032	0.00539536	0.0158016	2.00089	0.000243717	0.000278801	0.0166973	7.15185e-06	1.00056	1.00032	0.768472	0.694347	39.7832	-0.971511	-55.6635	1.66586	95.4467	-0.0949192	0.995485	-0.971511	-55.6635	0.564052	-0.825739	-0.0162424	0.00387112	-0.972754	0.231841	2.90762	166.595	0.323127	0.946356	1.24176	71.1479	0.000280663	0.016753	2.50621e+06	0.0175429	0.0175429	-0.0175386	-0.0175386	0.00444085	0.00444085	0.00445781
2016-04-24	114	453	1.00573	1.50455e+08	1.01149	1.00057	1.00032	0.00546336	0.015778	2.00089	0.000242749	0.000278795	0.0166972	7.0483e-06	1.00056	1.00032	0.765421	0.699101	40.0555	-0.969134	-55.5273	1.66824	95.5829	-0.0972851	0.995257	-0.969134	-55.5273	0.566013	-0.824396	-0.0162347	0.00390248	-0.972304	0.233721	2.90569	166.484	0.327203	0.944954	1.23745	70.9009	0.000280559	0.0167499	2.50575e+06	0.0175521	0.0175521	-0.0175478	-0.0175478	0.00440968	0.00440968	0.00442664
		454	1.0058	1.50465e+08	1.01163	1.00056	1.00032	0.00553115	0.0157545	2.00089	0.000241363	0.000278797	0.0166972	6.73619e-06	1.00056	1.00032	0.761048	0.705869	40.4433	-0.96575	-55.3334	1.67162	95.7767	-0.100652	0.994922	-0.96575	-55.3334	0.5688	-0.822476	-0.0162312	0.00391734	-0.97209	0.23461	2.90478	166.431	0.331262	0.943539	1.23316	70.6546	0.000280247	0.0167406	2.50436e+06	0.0175565	0.0175565	-0.0175522	-0.0175522	0.00439496	0.00439496	0.00441193
		455	1.00586	1.50475e+08	1.01176	1.00056	1.00032	0.00559894	0.0157303	2.00089	0.000238778	0.00027879	0.016697	7.03212e-06	1.00056	1.00032	0.752899	0.718341	41.1579	-0.959515	-54.9761	1.67786	96.134	-0.106855	0.994275	-0.959515	-54.9761	0.573918	-0.818913	-0.0162385	0.00388603	-0.972539	0.232738	2.9067	166.542	0.335326	0.942102	1.22885	70.4076	0.000280543	0.0167494	2.50568e+06	0.017547	0.017547	-0.0175427	-0.0175427	0.00442591	0.00442591	0.00444287
		456	1.00593	1.50485e+08	1.0119	1.00056	1.00033	0.00566653	0.0157061	2.00089	0.000236599	0.000278791	0.016697	7.53215e-06	1.00056	1.00032	0.746029	0.728717	41.7524	-0.954326	-54.6789	1.68304	96.4313	-0.112012	0.993707	-0.954326	-54.6789	0.578159	-0.815924	-0.016242	0.0038716	-0.972746	0.231873	2.90759	166.593	0.339373	0.940652	1.22455	70.1613	0.000281043	0.0167643	2.50791e+06	0.0175428	0.0175428	-0.0175385	-0.0175385	0.00444023	0.00444023	0.00445718
2016-04-25	115	457	1.006	1.50495e+08	1.01203	1.00056	1.00033	0.00573412	0.0156813	2.00089	0.000235622	0.000278784	0.0166968	7.4406e-06	1.00055	1.00032	0.742948	0.733333	42.0169	-0.952019	-54.5467	1.68535	96.5635	-0.114305	0.993446	-0.952019	-54.5467	0.58004	-0.814588	-0.016234	0.00390409	-0.972279	0.233822	2.90559	166.478	0.343426	0.93918	1.22023	69.9143	0.000280952	0.0167616	2.5075e+06	0.0175522	0.0175522	-0.0175479	-0.0175479	0.00440792	0.00440792	0.00442488
		458	1.00606	1.50505e+08	1.01216	1.00056	1.00033	0.00580147	0.0156565	2.00089	0.000234175	0.000278784	0.0166968	7.11529e-06	1.00055	1.00032	0.738385	0.740124	42.406	-0.948623	-54.3521	1.68875	96.7581	-0.117678	0.993052	-0.948623	-54.3521	0.582803	-0.812614	-0.0162305	0.00391873	-0.972068	0.234699	2.90468	166.426	0.347459	0.937695	1.21594	69.668	0.000280626	0.0167519	2.50605e+06	0.0175566	0.0175566	-0.0175523	-0.0175523	0.00439339	0.00439339	0.00441036
		459	1.00613	1.50515e+08	1.0123	1.00056	1.00033	0.00586882	0.0156312	2.00089	0.000231603	0.000278777	0.0166966	7.36117e-06	1.00055	1.00032	0.730277	0.75207	43.0904	-0.94265	-54.0099	1.69472	97.1003	-0.123607	0.992331	-0.94265	-54.0099	0.587646	-0.809118	-0.0162367	0.00389169	-0.972457	0.233083	2.90635	166.521	0.351497	0.936189	1.21163	69.4211	0.000280872	0.0167592	2.50715e+06	0.0175483	0.0175483	-0.0175441	-0.0175441	0.00442011	0.00442011	0.00443707
		460	1.0062	1.50525e+08	1.01243	1.00056	1.00033	0.00593598	0.0156058	2.00089	0.000229413	0.000278778	0.0166967	7.79866e-06	1.00055	1.00032	0.723369	0.762127	43.6667	-0.937621	-53.7217	1.69975	97.3884	-0.128595	0.991697	-0.937621	-53.7217	0.591707	-0.806153	-0.0162396	0.00387986	-0.972627	0.232373	2.90708	166.563	0.355519	0.934669	1.20733	69.1747	0.00028131	0.0167723	2.5091e+06	0.0175449	0.0175449	-0.0175406	-0.0175406	0.00443186	0.00443186	0.00444882
2016-04-26	116	461	1.00626	1.50535e+08	1.01257	1.00056	1.00033	0.00600314	0.0155799	2.00089	0.000228347	0.000278772	0.0166965	7.68272e-06	1.00055	1.00032	0.720008	0.766983	43.9449	-0.935194	-53.5827	1.70218	97.5275	-0.131002	0.991382	-0.935194	-53.5827	0.593663	-0.804714	-0.0162321	0.0039104	-0.972187	0.234205	2.90519	166.455	0.359545	0.933128	1.20302	68.9277	0.000281194	0.0167688	2.50858e+06	0.0175537	0.0175537	-0.0175495	-0.0175495	0.00440148	0.00440148	0.00441845
		462	1.00633	1.50545e+08	1.0127	1.00056	1.00033	0.00607005	0.015554	2.00089	0.000226785	0.000278774	0.0166965	7.32037e-06	1.00055	1.00032	0.715085	0.774051	44.3498	-0.93166	-53.3802	1.70571	97.73	-0.134505	0.990913	-0.93166	-53.3802	0.596503	-0.802611	-0.0162292	0.0039228	-0.972008	0.234947	2.90443	166.412	0.363552	0.931574	1.19872	68.6815	0.000280831	0.016758	2.50696e+06	0.0175574	0.0175574	-0.0175532	-0.0175532	0.0043892	0.0043892	0.00440617
		463	1.00639	1.50555e+08	1.01283	1.00056	1.00033	0.00613697	0.0155276	2.00089	0.0002241	0.000278768	0.0166963	7.52927e-06	1.00055	1.00032	0.706616	0.786092	45.0398	-0.925639	-53.0352	1.71173	98.075	-0.140469	0.990085	-0.925639	-53.0352	0.601324	-0.799005	-0.0162357	0.00389498	-0.972409	0.233283	2.90614	166.51	0.367564	0.929998	1.19441	68.4346	0.00028104	0.0167643	2.5079e+06	0.017549	0.017549	-0.0175448	-0.0175448	0.00441671	0.00441671	0.00443367
		464	1.00646	1.50564e+08	1.01296	1.00056	1.00033	0.00620368	0.0155011	2.00089	0.000221819	0.00027877	0.0166964	7.94216e-06	1.00055	1.00033	0.699424	0.796205	45.6192	-0.920583	-52.7455	1.71679	98.3647	-0.145473	0.989362	-0.920583	-52.7455	0.605357	-0.795954	-0.0162387	0.00388269	-0.972585	0.232547	2.9069	166.553	0.371558	0.92841	1.19011	68.1883	0.000281453	0.0167766	2.50974e+06	0.0175454	0.0175454	-0.0175412	-0.0175412	0.00442892	0.00442892	0.00444588
2016-04-27	117	465	1.00653	1.50574e+08	1.0131	1.00056	1.00033	0.00627039	0.015474	2.00089	0.000220739	0.000278764	0.0166962	7.76359e-06	1.00055	1.00033	0.696019	0.800959	45.8916	-0.918206	-52.6093	1.71916	98.5009	-0.147824	0.989014	-0.918206	-52.6093	0.607247	-0.794513	-0.0162309	0.00391406	-0.972133	0.234428	2.90496	166.442	0.375558	0.926799	1.1858	67.9412	0.000281275	0.0167712	2.50894e+06	0.0175546	0.0175546	-0.0175503	-0.0175503	0.00439772	0.00439772	0.00441468
		466	1.00659	1.50584e+08	1.01323	1.00055	1.00033	0.00633686	0.015447	2.00089	0.000219188	0.000278765	0.0166962	7.35113e-06	1.00055	1.00033	0.691129	0.807746	46.2805	-0.914812	-52.4149	1.72256	98.6953	-0.15118	0.988506	-0.914812	-52.4149	0.60994	-0.792448	-0.0162274	0.00392876	-0.971921	0.235308	2.90406	166.39	0.379538	0.925176	1.1815	67.6949	0.000280862	0.0167589	2.5071e+06	0.0175589	0.0175589	-0.0175547	-0.0175547	0.00438315	0.00438315	0.00440012
		467	1.00666	1.50594e+08	1.01336	1.00055	1.00034	0.00640334	0.0154193	2.00089	0.000216488	0.000278758	0.0166961	7.52229e-06	1.00055	1.00033	0.682615	0.819462	46.9517	-0.908954	-52.0792	1.72842	99.0309	-0.156968	0.987604	-0.908954	-52.0792	0.614571	-0.788861	-0.0162333	0.00390362	-0.972283	0.233805	2.9056	166.479	0.383524	0.923531	1.17719	67.4479	0.000281033	0.016764	2.50787e+06	0.0175513	0.0175513	-0.017547	-0.017547	0.004408	0.004408	0.00442496
		468	1.00672	1.50604e+08	1.01349	1.00055	1.00034	0.00646957	0.0153917	2.00089	0.000214267	0.000278759	0.0166961	7.93467e-06	1.00054	1.00033	0.675612	0.829002	47.4983	-0.904184	-51.8059	1.73319	99.3043	-0.161677	0.986844	-0.904184	-51.8059	0.618327	-0.785921	-0.0162352	0.00389598	-0.972394	0.233347	2.90607	166.506	0.387491	0.921874	1.17289	67.2016	0.000281446	0.0167763	2.50971e+06	0.0175491	0.0175491	-0.0175448	-0.0175448	0.00441559	0.00441559	0.00443255
2016-04-28	118	469	1.00679	1.50613e+08	1.01362	1.00055	1.00034	0.00653581	0.0153635	2.00089	0.000213195	0.000278753	0.0166959	7.78102e-06	1.00054	1.00033	0.672233	0.833575	47.7603	-0.901897	-51.6749	1.73547	99.4352	-0.163933	0.986471	-0.901897	-51.6749	0.620123	-0.784505	-0.016227	0.00392882	-0.971919	0.235316	2.90405	166.39	0.391462	0.920194	1.16858	66.9545	0.000281292	0.0167718	2.50902e+06	0.0175586	0.0175586	-0.0175543	-0.0175543	0.00438292	0.00438292	0.00439989
		470	1.00685	1.50623e+08	1.01375	1.00055	1.00034	0.00660178	0.0153352	2.00089	0.000211603	0.000278753	0.0166959	7.36826e-06	1.00054	1.00033	0.667211	0.840338	48.1478	-0.898516	-51.4812	1.73885	99.629	-0.167268	0.985912	-0.898516	-51.4812	0.622772	-0.782404	-0.0162235	0.00394368	-0.971703	0.236207	2.90313	166.337	0.395413	0.918503	1.16428	66.7082	0.000280879	0.0167595	2.50718e+06	0.017563	0.017563	-0.0175588	-0.0175588	0.00436816	0.00436816	0.00438514
		471	1.00692	1.50633e+08	1.01388	1.00055	1.00034	0.00666776	0.0153064	2.00089	0.00020886	0.000278746	0.0166957	7.53919e-06	1.00054	1.00033	0.658563	0.851889	48.8096	-0.89274	-51.1503	1.74463	99.9599	-0.172959	0.984929	-0.89274	-51.1503	0.62728	-0.778794	-0.016229	0.00391988	-0.972048	0.234784	2.9046	166.421	0.39937	0.91679	1.15997	66.4612	0.00028105	0.0167646	2.50794e+06	0.0175558	0.0175558	-0.0175515	-0.0175515	0.00439169	0.00439169	0.00440866
		472	1.00698	1.50643e+08	1.01402	1.00055	1.00034	0.0067335	0.0152777	2.00089	0.000206571	0.000278747	0.0166957	7.93884e-06	1.00054	1.00033	0.651346	0.861439	49.3568	-0.887966	-50.8767	1.7494	100.233	-0.17766	0.984092	-0.887966	-50.8767	0.630992	-0.77579	-0.0162309	0.00391216	-0.972159	0.234321	2.90507	166.448	0.403307	0.915065	1.15567	66.2149	0.00028145	0.0167765	2.50972e+06	0.0175535	0.0175535	-0.0175492	-0.0175492	0.00439936	0.00439936	0.00441632
2016-04-29	119	473	1.00705	1.50652e+08	1.01415	1.00055	1.00034	0.00679925	0.0152483	2.00089	0.00020533	0.000278742	0.0166956	7.82331e-06	1.00054	1.00033	0.647433	0.866584	49.6516	-0.885393	-50.7293	1.75198	100.381	-0.180191	0.983632	-0.885393	-50.7293	0.632985	-0.774164	-0.0162239	0.00394034	-0.97175	0.236012	2.90333	166.349	0.407249	0.913317	1.15136	65.9678	0.000281334	0.016773	2.50921e+06	0.0175617	0.0175617	-0.0175574	-0.0175574	0.00437131	0.00437131	0.00438828
		474	1.00711	1.50662e+08	1.01428	1.00055	1.00034	0.00686472	0.015219	2.00089	0.000203542	0.000278743	0.0166956	7.436e-06	1.00054	1.00034	0.641796	0.873959	50.0741	-0.881706	-50.518	1.75566	100.592	-0.183817	0.982961	-0.881706	-50.518	0.635836	-0.771825	-0.0162215	0.00395024	-0.971606	0.236604	2.90272	166.314	0.41117	0.911559	1.14706	65.7217	0.000280947	0.0167615	2.50748e+06	0.0175646	0.0175646	-0.0175604	-0.0175604	0.0043615	0.0043615	0.00437847
		475	1.00718	1.50672e+08	1.01441	1.00054	1.00034	0.0069302	0.0151891	2.00089	0.000200629	0.000278737	0.0166954	7.62014e-06	1.00054	1.00034	0.632608	0.88588	50.7572	-0.875745	-50.1765	1.76162	100.934	-0.189672	0.981847	-0.875745	-50.1765	0.640425	-0.768021	-0.0162279	0.00392343	-0.971995	0.235	2.90437	166.408	0.415095	0.909778	1.14275	65.4747	0.000281131	0.016767	2.5083e+06	0.0175566	0.0175566	-0.0175523	-0.0175523	0.00438803	0.00438803	0.004405
		476	1.00724	1.50681e+08	1.01453	1.00054	1.00035	0.00699543	0.0151593	2.00089	0.000198193	0.000278739	0.0166955	8.04535e-06	1.00054	1.00034	0.62493	0.895754	51.3229	-0.870808	-49.8936	1.76656	101.217	-0.194518	0.980899	-0.870808	-49.8936	0.644209	-0.76485	-0.0162304	0.00391307	-0.972145	0.234379	2.90501	166.445	0.419001	0.907986	1.13845	65.2284	0.000281556	0.0167796	2.5102e+06	0.0175535	0.0175535	-0.0175493	-0.0175493	0.00439834	0.00439834	0.00441531
2016-04-30	120	477	1.00731	1.50691e+08	1.01466	1.00054	1.00035	0.00706067	0.0151288	2.00089	0.000196983	0.000278732	0.0166953	7.86661e-06	1.00054	1.00034	0.621114	0.900633	51.6024	-0.868369	-49.7539	1.769	101.356	-0.19691	0.980422	-0.868369	-49.7539	0.646073	-0.763276	-0.0162229	0.00394343	-0.971704	0.2362	2.90314	166.338	0.422914	0.90617	1.13414	64.9813	0.000281378	0.0167743	2.5094e+06	0.0175623	0.0175623	-0.0175581	-0.0175581	0.00436811	0.00436811	0.00438508
		478	1.00737	1.507e+08	1.01479	1.00054	1.00035	0.00712564	0.0150983	2.00089	0.000195251	0.000278733	0.0166953	7.42861e-06	1.00053	1.00034	0.615652	0.907584	52.0007	-0.864893	-49.5547	1.77248	101.555	-0.200316	0.979731	-0.864893	-49.5547	0.648721	-0.761026	-0.0162196	0.00395678	-0.97151	0.237	2.90232	166.29	0.426805	0.904344	1.12984	64.735	0.00028094	0.0167613	2.50745e+06	0.0175662	0.0175662	-0.017562	-0.017562	0.00435484	0.00435484	0.00437182
		479	1.00743	1.5071e+08	1.01492	1.00054	1.00035	0.00719061	0.0150672	2.00089	0.000192417	0.000278726	0.0166951	7.54983e-06	1.00053	1.00034	0.606716	0.918874	52.6476	-0.859248	-49.2313	1.77812	101.879	-0.205843	0.978585	-0.859248	-49.2313	0.653007	-0.757352	-0.0162247	0.00393513	-0.971824	0.235706	2.90365	166.367	0.430702	0.902494	1.12553	64.4879	0.000281061	0.0167649	2.50799e+06	0.0175597	0.0175597	-0.0175554	-0.0175554	0.00437625	0.00437625	0.00439322
		480	1.0075	1.50719e+08	1.01505	1.00054	1.00035	0.00725532	0.0150362	2.00089	0.000190111	0.000278726	0.0166951	7.9369e-06	1.00053	1.00034	0.599444	0.927989	53.1699	-0.85469	-48.9701	1.78268	102.14	-0.210302	0.977637	-0.85469	-48.9701	0.656452	-0.754368	-0.0162257	0.00393093	-0.971885	0.235454	2.90391	166.382	0.434578	0.900634	1.12123	64.2416	0.000281448	0.0167764	2.50972e+06	0.0175584	0.0175584	-0.0175542	-0.0175542	0.00438042	0.00438042	0.00439739
2016-05-01	121	481	1.00756	1.50729e+08	1.01518	1.00054	1.00035	0.00732003	0.0150046	2.00089	0.000188826	0.000278722	0.016695	7.82158e-06	1.00053	1.00034	0.595394	0.93304	53.4593	-0.852165	-48.8254	1.78521	102.285	-0.21277	0.977102	-0.852165	-48.8254	0.658355	-0.752707	-0.0162185	0.00395988	-0.971463	0.23719	2.90212	166.279	0.438457	0.898752	1.11691	63.9945	0.000281333	0.016773	2.5092e+06	0.0175668	0.0175668	-0.0175626	-0.0175626	0.0043516	0.0043516	0.00436858
		482	1.00762	1.50738e+08	1.01531	1.00054	1.00035	0.00738446	0.0149731	2.00089	0.000186994	0.000278723	0.016695	7.43435e-06	1.00053	1.00034	0.589616	0.940213	53.8702	-0.848579	-48.62	1.78879	102.49	-0.216273	0.976333	-0.848579	-48.62	0.66105	-0.750342	-0.0162158	0.00397143	-0.971294	0.237881	2.90141	166.238	0.442315	0.89686	1.11262	63.7483	0.000280945	0.0167614	2.50747e+06	0.0175702	0.0175702	-0.017566	-0.017566	0.00434015	0.00434015	0.00435713
		483	1.00769	1.50748e+08	1.01543	1.00054	1.00035	0.00744889	0.014941	2.00089	0.000184035	0.000278718	0.0166949	7.61872e-06	1.00053	1.00034	0.580286	0.951717	54.5293	-0.842827	-48.2904	1.79454	102.82	-0.221885	0.975073	-0.842827	-48.2904	0.665355	-0.746527	-0.0162213	0.00394804	-0.971636	0.236483	2.90285	166.321	0.446179	0.894944	1.10831	63.5012	0.00028113	0.0167669	2.5083e+06	0.0175632	0.0175632	-0.017559	-0.017559	0.00436331	0.00436331	0.00438028
		484	1.00775	1.50757e+08	1.01556	1.00054	1.00035	0.00751309	0.0149088	2.00089	0.000181554	0.00027872	0.0166949	8.04405e-06	1.00053	1.00035	0.572462	0.96129	55.0779	-0.83804	-48.0161	1.79933	103.094	-0.22655	0.974	-0.83804	-48.0161	0.668921	-0.743333	-0.0162233	0.00394015	-0.971751	0.236009	2.90334	166.349	0.450023	0.893017	1.10401	63.2549	0.000281555	0.0167796	2.51019e+06	0.017561	0.017561	-0.0175567	-0.0175567	0.00437117	0.00437117	0.00438815
2016-05-02	122	485	1.00781	1.50767e+08	1.01569	1.00053	1.00035	0.00757728	0.0148762	2.00089	0.000180195	0.000278715	0.0166948	7.91631e-06	1.00053	1.00035	0.568178	0.966506	55.3767	-0.835432	-47.8667	1.80194	103.243	-0.229089	0.973406	-0.835432	-47.8667	0.670857	-0.741586	-0.0162164	0.00396781	-0.971346	0.237668	2.90163	166.251	0.453872	0.891067	1.09969	63.0076	0.000281427	0.0167758	2.50962e+06	0.0175689	0.0175689	-0.0175647	-0.0175647	0.00434363	0.00434363	0.00436061
		486	1.00788	1.50776e+08	1.01582	1.00053	1.00036	0.00764116	0.0148435	2.00089	0.000178212	0.000278716	0.0166948	7.4788e-06	1.00053	1.00035	0.561928	0.974082	55.8108	-0.831644	-47.6497	1.80573	103.46	-0.232775	0.972531	-0.831644	-47.6497	0.673662	-0.73904	-0.0162144	0.00397608	-0.971225	0.238163	2.90112	166.222	0.457697	0.889108	1.09539	62.7614	0.00028099	0.0167628	2.50767e+06	0.0175714	0.0175714	-0.0175672	-0.0175672	0.00433542	0.00433542	0.0043524
		487	1.00794	1.50786e+08	1.01594	1.00053	1.00036	0.00770505	0.0148103	2.00089	0.000175152	0.000278711	0.0166947	7.58834e-06	1.00052	1.00035	0.552278	0.985702	56.4765	-0.825834	-47.3168	1.81154	103.793	-0.238421	0.971162	-0.825834	-47.3168	0.677944	-0.735114	-0.0162202	0.00395177	-0.971581	0.236709	2.90262	166.308	0.461528	0.887126	1.09108	62.5143	0.000281099	0.016766	2.50816e+06	0.0175641	0.0175641	-0.0175599	-0.0175599	0.00435951	0.00435951	0.00437648
		488	1.008	1.50795e+08	1.01607	1.00053	1.00036	0.00776863	0.014777	2.00089	0.000172694	0.000278712	0.0166947	8.0008e-06	1.00052	1.00035	0.544526	0.994973	57.0077	-0.821199	-47.0512	1.81617	104.059	-0.24292	0.970046	-0.821199	-47.0512	0.681344	-0.731963	-0.0162216	0.00394629	-0.971661	0.23638	2.90295	166.327	0.465336	0.885134	1.08678	62.2681	0.000281512	0.0167783	2.51e+06	0.0175625	0.0175625	-0.0175583	-0.0175583	0.00436497	0.00436497	0.00438194
2016-05-03	123	489	1.00806	1.50804e+08	1.01619	1.00053	1.00036	0.00783221	0.0147432	2.00089	0.000171382	0.000278707	0.0166945	7.84758e-06	1.00052	1.00035	0.540391	0.999894	57.2897	-0.818738	-46.9102	1.81863	104.2	-0.245307	0.969446	-0.818738	-46.9102	0.683144	-0.730284	-0.0162141	0.00397629	-0.971221	0.238179	2.9011	166.221	0.469149	0.883119	1.08247	62.0209	0.000281359	0.0167737	2.50932e+06	0.0175712	0.0175712	-0.017567	-0.017567	0.00433507	0.00433507	0.00435206
		490	1.00813	1.50814e+08	1.01632	1.00053	1.00036	0.00789548	0.0147095	2.00089	0.000169447	0.000278707	0.0166945	7.3845e-06	1.00052	1.00035	0.534288	1.00713	57.7043	-0.81512	-46.7029	1.82225	104.407	-0.248813	0.968552	-0.81512	-46.7029	0.685781	-0.727808	-0.0162114	0.00398728	-0.971059	0.238838	2.90042	166.182	0.472939	0.881095	1.07817	61.7748	0.000280896	0.0167599	2.50725e+06	0.0175743	0.0175743	-0.0175702	-0.0175702	0.00432414	0.00432414	0.00434113
		491	1.00819	1.50823e+08	1.01645	1.00053	1.00036	0.00795875	0.0146751	2.00089	0.000166433	0.000278701	0.0166943	7.46854e-06	1.00052	1.00035	0.524786	1.01833	58.3462	-0.809518	-46.382	1.82785	104.728	-0.254234	0.967143	-0.809518	-46.382	0.689847	-0.723955	-0.0162163	0.00396634	-0.971367	0.237586	2.90171	166.256	0.476733	0.879048	1.07386	61.5277	0.00028098	0.0167624	2.50763e+06	0.0175681	0.0175681	-0.0175639	-0.0175639	0.00434488	0.00434488	0.00436186
		492	1.00825	1.50832e+08	1.01657	1.00053	1.00036	0.00802172	0.0146408	2.00089	0.00016402	0.000278701	0.0166943	7.85543e-06	1.00052	1.00035	0.517178	1.02725	58.8569	-0.805062	-46.1267	1.83231	104.984	-0.258541	0.966	-0.805062	-46.1267	0.693067	-0.720874	-0.0162169	0.00396373	-0.971405	0.23743	2.90187	166.265	0.480506	0.876992	1.06957	61.2816	0.000281366	0.016774	2.50935e+06	0.0175673	0.0175673	-0.0175631	-0.0175631	0.00434746	0.00434746	0.00436444
2016-05-04	124	493	1.00831	1.50841e+08	1.0167	1.00053	1.00036	0.00808469	0.014606	2.00089	0.000162577	0.000278697	0.0166942	7.76549e-06	1.00052	1.00036	0.512627	1.03255	59.161	-0.802408	-45.9746	1.83496	105.136	-0.261104	0.965311	-0.802408	-45.9746	0.694978	-0.719031	-0.0162102	0.00399055	-0.97101	0.239038	2.90022	166.17	0.484281	0.874913	1.06526	61.0346	0.000281277	0.0167713	2.50895e+06	0.017575	0.017575	-0.0175708	-0.0175708	0.00432074	0.00432074	0.00433772
		494	1.00837	1.50851e+08	1.01682	1.00052	1.00036	0.00814732	0.0145712	2.00089	0.000160459	0.000278697	0.0166942	7.34041e-06	1.00052	1.00036	0.505948	1.04032	59.6057	-0.798527	-45.7522	1.83884	105.358	-0.264848	0.96429	-0.798527	-45.7522	0.697763	-0.716329	-0.0162086	0.00399723	-0.970912	0.239438	2.89981	166.147	0.488032	0.872826	1.06096	60.7887	0.000280851	0.0167586	2.50705e+06	0.017577	0.017577	-0.0175728	-0.0175728	0.00431411	0.00431411	0.0043311
		495	1.00844	1.5086e+08	1.01694	1.00052	1.00037	0.00820994	0.0145358	2.00089	0.000157286	0.000278693	0.0166941	7.45019e-06	1.00052	1.00036	0.495945	1.05187	60.2679	-0.792748	-45.4211	1.84462	105.689	-0.270417	0.962743	-0.792748	-45.4211	0.701891	-0.712285	-0.0162144	0.00397335	-0.971263	0.238009	2.90128	166.231	0.491787	0.870715	1.05666	60.5419	0.000280961	0.0167619	2.50754e+06	0.0175699	0.0175699	-0.0175657	-0.0175657	0.00433779	0.00433779	0.00435477
		496	1.0085	1.50869e+08	1.01707	1.00052	1.00037	0.00827231	0.0145005	2.00089	0.00015464	0.000278695	0.0166941	7.82553e-06	1.00051	1.00036	0.4876	1.06146	60.817	-0.787956	-45.1466	1.84941	105.964	-0.275026	0.961437	-0.787956	-45.1466	0.705296	-0.708913	-0.0162164	0.00396529	-0.971381	0.237526	2.90177	166.259	0.495522	0.868596	1.05236	60.2958	0.000281337	0.0167731	2.50922e+06	0.0175676	0.0175676	-0.0175634	-0.0175634	0.00434582	0.00434582	0.0043628
2016-05-05	125	497	1.00856	1.50878e+08	1.01719	1.00052	1.00037	0.00833468	0.0144645	2.00089	0.000153166	0.00027869	0.016694	7.62266e-06	1.00051	1.00036	0.482952	1.06677	61.1216	-0.785298	-44.9943	1.85207	106.116	-0.277581	0.960702	-0.785298	-44.9943	0.707178	-0.707036	-0.0162097	0.00399206	-0.970987	0.239131	2.90012	166.165	0.499262	0.866451	1.04805	60.0488	0.000281134	0.016767	2.50831e+06	0.0175752	0.0175752	-0.0175711	-0.0175711	0.00431914	0.00431914	0.00433612
		498	1.00862	1.50887e+08	1.01731	1.00052	1.00037	0.0083968	0.0144286	2.00089	0.000151192	0.000278691	0.016694	7.17281e-06	1.00051	1.00036	0.476729	1.07387	61.528	-0.781752	-44.7911	1.85562	106.319	-0.280986	0.959712	-0.781752	-44.7911	0.70968	-0.704524	-0.0162067	0.00400426	-0.970807	0.239862	2.89937	166.122	0.502982	0.864297	1.04375	59.8025	0.000280684	0.0167536	2.50631e+06	0.0175788	0.0175788	-0.0175746	-0.0175746	0.00430701	0.00430701	0.004324
		499	1.00868	1.50896e+08	1.01744	1.00052	1.00037	0.00845891	0.0143921	2.00089	0.000148115	0.000278686	0.0166939	7.28256e-06	1.00051	1.00036	0.467026	1.08487	62.1585	-0.776249	-44.4758	1.86112	106.634	-0.286263	0.958151	-0.776249	-44.4758	0.713546	-0.700608	-0.0162113	0.00398499	-0.971091	0.238709	2.90056	166.19	0.506707	0.862118	1.03944	59.5553	0.000280794	0.0167569	2.5068e+06	0.0175731	0.0175731	-0.0175689	-0.0175689	0.00432612	0.00432612	0.00434311
		500	1.00874	1.50906e+08	1.01756	1.00052	1.00037	0.00852074	0.0143556	2.00089	0.000145613	0.000278687	0.0166939	7.68263e-06	1.00051	1.00036	0.459138	1.09377	62.6685	-0.771799	-44.2208	1.86557	106.889	-0.290524	0.956868	-0.771799	-44.2208	0.716657	-0.697426	-0.0162119	0.00398256	-0.971127	0.238563	2.90071	166.198	0.51041	0.859931	1.03514	59.3089	0.000281194	0.0167688	2.50858e+06	0.0175724	0.0175724	-0.0175682	-0.0175682	0.00432855	0.00432855	0.00434553
2016-05-06	126	501	1.0088	1.50915e+08	1.01768	1.00052	1.00037	0.00858257	0.0143186	2.00089	0.000144131	0.000278684	0.0166938	7.58065e-06	1.00051	1.00036	0.454463	1.09903	62.9696	-0.769171	-44.0703	1.8682	107.04	-0.293037	0.956101	-0.769171	-44.0703	0.718487	-0.69554	-0.0162051	0.00400991	-0.970723	0.240203	2.89902	166.101	0.514116	0.85772	1.03082	59.0616	0.000281092	0.0167658	2.50813e+06	0.0175803	0.0175803	-0.0175761	-0.0175761	0.0043013	0.0043013	0.00431829
		502	1.00886	1.50924e+08	1.0178	1.00051	1.00037	0.00864403	0.0142817	2.00089	0.000141896	0.000278685	0.0166939	7.10553e-06	1.00051	1.00037	0.447418	1.10692	63.4218	-0.765225	-43.8442	1.87215	107.266	-0.296808	0.954937	-0.765225	-43.8442	0.721227	-0.692699	-0.0162037	0.00401559	-0.970639	0.240543	2.89867	166.081	0.517797	0.855504	1.02652	58.8154	0.000280617	0.0167516	2.50601e+06	0.0175819	0.0175819	-0.0175778	-0.0175778	0.00429566	0.00429566	0.00431265
		503	1.00892	1.50933e+08	1.01792	1.00051	1.00037	0.00870548	0.0142441	2.00089	0.000138632	0.000278681	0.0166937	7.15314e-06	1.00051	1.00037	0.437124	1.1184	64.0794	-0.759486	-43.5154	1.87788	107.595	-0.302284	0.953218	-0.759486	-43.5154	0.72519	-0.688549	-0.0162093	0.00399245	-0.970981	0.239158	2.90009	166.163	0.521481	0.853263	1.02221	58.5683	0.000280664	0.016753	2.50622e+06	0.0175751	0.0175751	-0.0175709	-0.0175709	0.00431862	0.00431862	0.00433561
		504	1.00898	1.50942e+08	1.01805	1.00051	1.00038	0.00876658	0.0142066	2.00089	0.000136066	0.000278682	0.0166938	7.55294e-06	1.0005	1.00037	0.429034	1.12737	64.5937	-0.754998	-43.2582	1.88237	107.852	-0.306558	0.951852	-0.754998	-43.2582	0.728273	-0.685287	-0.0162101	0.00398932	-0.971027	0.238971	2.90029	166.174	0.525141	0.851015	1.01792	58.3222	0.000281064	0.016765	2.508e+06	0.0175742	0.0175742	-0.01757	-0.01757	0.00432174	0.00432174	0.00433872
2016-05-07	127	505	1.00904	1.50951e+08	1.01817	1.00051	1.00038	0.00882769	0.0141686	2.00089	0.00013457	0.000278677	0.0166936	7.4254e-06	1.0005	1.00037	0.424316	1.13259	64.8926	-0.75239	-43.1088	1.88498	108.001	-0.30904	0.951049	-0.75239	-43.1088	0.730058	-0.683386	-0.0162031	0.0040169	-0.970618	0.240625	2.89858	166.077	0.528806	0.848743	1.0136	58.0752	0.000280936	0.0167612	2.50743e+06	0.0175821	0.0175821	-0.0175779	-0.0175779	0.00429424	0.00429424	0.00431123
		506	1.0091	1.5096e+08	1.01829	1.00051	1.00038	0.00888848	0.0141306	2.00089	0.000132447	0.000278678	0.0166936	6.98769e-06	1.0005	1.00037	0.417624	1.13997	65.3153	-0.748701	-42.8974	1.88867	108.213	-0.312546	0.949903	-0.748701	-42.8974	0.732573	-0.680688	-0.0162007	0.00402674	-0.970472	0.241214	2.89798	166.042	0.532447	0.846463	1.00931	57.8291	0.000280499	0.0167481	2.50548e+06	0.0175849	0.0175849	-0.0175808	-0.0175808	0.00428445	0.00428445	0.00430144
		507	1.00916	1.50968e+08	1.01841	1.00051	1.00038	0.00894927	0.014092	2.00089	0.000129294	0.000278674	0.0166935	7.07279e-06	1.0005	1.00037	0.407682	1.15088	65.9407	-0.743244	-42.5847	1.89413	108.525	-0.317726	0.948183	-0.743244	-42.5847	0.736277	-0.67668	-0.0162052	0.00400815	-0.970748	0.240102	2.89912	166.107	0.536092	0.84416	1.005	57.582	0.000280584	0.0167506	2.50586e+06	0.0175794	0.0175794	-0.0175753	-0.0175753	0.00430289	0.00430289	0.00431988
		508	1.00922	1.50977e+08	1.01853	1.00051	1.00038	0.00900973	0.0140534	2.00089	0.00012679	0.000278674	0.0166935	7.48521e-06	1.0005	1.00037	0.399785	1.15951	66.4352	-0.738928	-42.3375	1.89844	108.773	-0.321815	0.946803	-0.738928	-42.3375	0.739191	-0.673496	-0.0162053	0.00400784	-0.970752	0.240083	2.89914	166.109	0.539714	0.841849	1.0007	57.3359	0.000280996	0.0167629	2.5077e+06	0.0175794	0.0175794	-0.0175752	-0.0175752	0.00430322	0.00430322	0.0043202
2016-05-08	128	509	1.00928	1.50986e+08	1.01865	1.00051	1.00038	0.0090702	0.0140144	2.00089	0.000125278	0.000278672	0.0166935	7.4084e-06	1.0005	1.00037	0.39502	1.16471	66.7328	-0.736331	-42.1887	1.90104	108.921	-0.324272	0.945964	-0.736331	-42.1887	0.740937	-0.671574	-0.0161983	0.00403561	-0.970339	0.241748	2.89743	166.01	0.543339	0.839514	0.996387	57.0888	0.000280919	0.0167607	2.50736e+06	0.0175873	0.0175873	-0.0175832	-0.0175832	0.00427552	0.00427552	0.00429252
		510	1.00934	1.50995e+08	1.01877	1.00051	1.00038	0.00913034	0.0139753	2.00089	0.000123115	0.000278673	0.0166935	7.00874e-06	1.0005	1.00038	0.388199	1.17212	67.1575	-0.732625	-41.9763	1.90474	109.134	-0.327776	0.944755	-0.732625	-41.9763	0.743421	-0.668823	-0.016196	0.00404516	-0.970197	0.242319	2.89684	165.977	0.54694	0.837172	0.992092	56.8427	0.00028052	0.0167487	2.50557e+06	0.0175901	0.0175901	-0.017586	-0.017586	0.00426603	0.00426603	0.00428303
		511	1.0094	1.51004e+08	1.01888	1.0005	1.00038	0.00919048	0.0139357	2.00089	0.000119872	0.00027867	0.0166934	7.15661e-06	1.0005	1.00038	0.377971	1.18319	67.7919	-0.727089	-41.6591	1.91028	109.451	-0.333001	0.942926	-0.727089	-41.6591	0.747113	-0.664697	-0.0162008	0.00402532	-0.970492	0.241133	2.89806	166.047	0.550546	0.834805	0.987779	56.5956	0.000280668	0.0167531	2.50623e+06	0.0175843	0.0175843	-0.0175801	-0.0175801	0.00428574	0.00428574	0.00430273
		512	1.00946	1.51013e+08	1.019	1.0005	1.00039	0.00925031	0.0138961	2.00089	0.000117251	0.000278671	0.0166934	7.61934e-06	1.0005	1.00038	0.369709	1.1921	68.3023	-0.722635	-41.4039	1.91474	109.706	-0.337198	0.941434	-0.722635	-41.4039	0.750066	-0.661363	-0.0162015	0.0040228	-0.97053	0.240981	2.89822	166.056	0.554128	0.832431	0.983481	56.3493	0.00028113	0.0167669	2.5083e+06	0.0175836	0.0175836	-0.0175794	-0.0175794	0.00428827	0.00428827	0.00430526
2016-05-09	129	513	1.00952	1.51021e+08	1.01912	1.0005	1.00039	0.00931013	0.013856	2.00089	0.000115674	0.000278668	0.0166934	7.56758e-06	1.00049	1.00038	0.364736	1.19745	68.6086	-0.719962	-41.2508	1.91741	109.859	-0.339713	0.940529	-0.719962	-41.2508	0.751831	-0.659356	-0.0161948	0.00404938	-0.970133	0.242574	2.89657	165.961	0.557715	0.830032	0.979166	56.1021	0.000281079	0.0167654	2.50807e+06	0.0175912	0.0175912	-0.017587	-0.017587	0.00426175	0.00426175	0.00427875
		514	1.00957	1.5103e+08	1.01924	1.0005	1.00039	0.00936955	0.0138159	2.00089	0.000113268	0.000278668	0.0166933	7.10456e-06	1.00049	1.00038	0.35715	1.20558	69.0747	-0.715894	-41.0177	1.92148	110.092	-0.343536	0.93914	-0.715894	-41.0177	0.754507	-0.656292	-0.0161938	0.00405305	-0.970078	0.242794	2.89635	165.948	0.561274	0.82763	0.974871	55.856	0.000280616	0.0167516	2.506e+06	0.0175922	0.0175922	-0.0175881	-0.0175881	0.00425809	0.00425809	0.00427509
		515	1.00963	1.51039e+08	1.01936	1.0005	1.00039	0.00942896	0.0137753	2.00089	0.000109929	0.000278665	0.0166933	7.11518e-06	1.00049	1.00038	0.346621	1.21683	69.7192	-0.71027	-40.6955	1.9271	110.415	-0.348812	0.937193	-0.71027	-40.6955	0.758186	-0.652039	-0.0161991	0.00403175	-0.970396	0.24152	2.89766	166.024	0.564836	0.825203	0.970561	55.6091	0.000280626	0.0167519	2.50605e+06	0.017586	0.017586	-0.0175818	-0.0175818	0.00427926	0.00427926	0.00429626
		516	1.00969	1.51047e+08	1.01947	1.0005	1.00039	0.00948802	0.0137347	2.00089	0.000107287	0.000278666	0.0166933	7.47774e-06	1.00049	1.00038	0.338291	1.2257	70.2272	-0.705837	-40.4415	1.93153	110.669	-0.352963	0.935637	-0.705837	-40.4415	0.761069	-0.648671	-0.0161997	0.00402949	-0.97043	0.241384	2.8978	166.032	0.568374	0.82277	0.966268	55.3631	0.000280989	0.0167627	2.50767e+06	0.0175854	0.0175854	-0.0175812	-0.0175812	0.00428153	0.00428153	0.00429853
2016-05-10	130	517	1.00975	1.51056e+08	1.01959	1.0005	1.00039	0.00954709	0.0136936	2.00089	0.000105714	0.000278662	0.0166932	7.31319e-06	1.00049	1.00038	0.333329	1.23096	70.529	-0.703203	-40.2906	1.93417	110.82	-0.355427	0.934704	-0.703203	-40.2906	0.762775	-0.646664	-0.0161928	0.00405662	-0.970024	0.243011	2.89612	165.936	0.571916	0.820312	0.961957	55.1161	0.000280824	0.0167578	2.50693e+06	0.0175931	0.0175931	-0.0175889	-0.0175889	0.00425444	0.00425444	0.00427145
		518	1.00981	1.51065e+08	1.01971	1.0005	1.00039	0.00960586	0.0136525	2.00089	0.000103563	0.000278663	0.0166932	6.86351e-06	1.00049	1.00039	0.326548	1.23815	70.9406	-0.699611	-40.0848	1.93776	111.025	-0.358782	0.933421	-0.699611	-40.0848	0.765093	-0.64392	-0.0161899	0.00406805	-0.969852	0.243695	2.89542	165.895	0.575435	0.817847	0.95766	54.8699	0.000280375	0.0167444	2.50492e+06	0.0175964	0.0175964	-0.0175923	-0.0175923	0.00424307	0.00424307	0.00426008
		519	1.00986	1.51073e+08	1.01982	1.00049	1.00039	0.00966464	0.0136108	2.00089	0.000100331	0.00027866	0.0166931	6.96155e-06	1.00049	1.00039	0.316356	1.24891	71.5573	-0.69423	-39.7764	1.94314	111.334	-0.3638	0.931477	-0.69423	-39.7764	0.768547	-0.639793	-0.0161942	0.00405076	-0.970111	0.242661	2.89649	165.956	0.578959	0.815356	0.953345	54.6226	0.000280473	0.0167473	2.50536e+06	0.0175913	0.0175913	-0.0175872	-0.0175872	0.00426026	0.00426026	0.00427726
		520	1.00992	1.51082e+08	1.01994	1.00049	1.0004	0.00972306	0.0135692	2.00089	9.7795e-05	0.000278661	0.0166931	7.41145e-06	1.00049	1.00039	0.308361	1.25733	72.0395	-0.690021	-39.5353	1.94735	111.575	-0.367716	0.929938	-0.690021	-39.5353	0.771232	-0.636554	-0.0161938	0.00405223	-0.970089	0.242749	2.89639	165.951	0.582459	0.81286	0.949046	54.3763	0.000280922	0.0167607	2.50737e+06	0.0175918	0.0175918	-0.0175876	-0.0175876	0.0042588	0.0042588	0.0042758
2016-05-11	131	521	1.00998	1.51091e+08	1.02006	1.00049	1.0004	0.00978149	0.0135271	2.00089	9.61497e-05	0.000278659	0.0166931	7.42304e-06	1.00048	1.00039	0.303173	1.26278	72.3517	-0.687297	-39.3792	1.95007	111.731	-0.370249	0.928933	-0.687297	-39.3792	0.772964	-0.63445	-0.0161873	0.00407796	-0.969702	0.24429	2.8948	165.86	0.58596	0.81034	0.944732	54.1291	0.000280934	0.0167611	2.50742e+06	0.0175991	0.0175991	-0.017595	-0.017595	0.00423313	0.00423313	0.00425014
		522	1.01003	1.51099e+08	1.02017	1.00049	1.0004	0.00983954	0.013485	2.00089	9.37502e-05	0.000278661	0.0166931	7.06106e-06	1.00048	1.00039	0.295607	1.27071	72.8061	-0.683332	-39.152	1.95404	111.958	-0.373929	0.927457	-0.683332	-39.152	0.775473	-0.63138	-0.016186	0.00408333	-0.969621	0.244611	2.89447	165.841	0.589436	0.807815	0.940436	53.883	0.000280572	0.0167503	2.50581e+06	0.0176007	0.0176007	-0.0175966	-0.0175966	0.0042278	0.0042278	0.00424481
		523	1.01009	1.51108e+08	1.02028	1.00049	1.0004	0.00989759	0.0134424	2.00089	9.03918e-05	0.00027866	0.0166931	7.18522e-06	1.00048	1.00039	0.285017	1.28177	73.4401	-0.677799	-38.835	1.95957	112.275	-0.379055	0.925374	-0.677799	-38.835	0.778955	-0.62708	-0.016191	0.00406357	-0.969919	0.243428	2.89569	165.911	0.592914	0.805266	0.936123	53.6359	0.000280696	0.016754	2.50636e+06	0.017595	0.017595	-0.0175909	-0.0175909	0.00424749	0.00424749	0.00426449
		524	1.01015	1.51116e+08	1.0204	1.00049	1.0004	0.00995526	0.0133998	2.00089	8.77792e-05	0.000278662	0.0166932	7.68591e-06	1.00048	1.00039	0.27678	1.29036	73.9319	-0.673507	-38.5891	1.96386	112.521	-0.383023	0.923739	-0.673507	-38.5891	0.781639	-0.623731	-0.016191	0.00406364	-0.969918	0.243431	2.89569	165.911	0.596367	0.802712	0.931828	53.3898	0.000281197	0.0167689	2.5086e+06	0.0175951	0.0175951	-0.0175909	-0.0175909	0.00424745	0.00424745	0.00426446
2016-05-12	132	525	1.0102	1.51124e+08	1.02051	1.00049	1.0004	0.0100129	0.0133567	2.00089	8.62338e-05	0.00027866	0.0166931	7.65967e-06	1.00048	1.00039	0.271907	1.29542	74.2222	-0.670974	-38.444	1.9664	112.666	-0.385362	0.922766	-0.670974	-38.444	0.783217	-0.621749	-0.0161837	0.00409244	-0.969483	0.245157	2.89391	165.809	0.599824	0.800132	0.927515	53.1427	0.000281171	0.0167681	2.50848e+06	0.0176032	0.0176032	-0.0175991	-0.0175991	0.0042187	0.0042187	0.00423571
		526	1.01026	1.51133e+08	1.02063	1.00049	1.0004	0.0100702	0.0133136	2.00089	8.38832e-05	0.00027866	0.0166931	7.23452e-06	1.00048	1.00039	0.264495	1.30312	74.6631	-0.667127	-38.2236	1.97024	112.887	-0.388909	0.921276	-0.667127	-38.2236	0.785603	-0.618731	-0.0161819	0.00409968	-0.969374	0.245591	2.89346	165.783	0.603255	0.797548	0.92322	52.8966	0.000280746	0.0167555	2.50658e+06	0.0176053	0.0176053	-0.0176012	-0.0176012	0.00421147	0.00421147	0.00422849
		527	1.01032	1.51141e+08	1.02074	1.00048	1.0004	0.0101275	0.0132699	2.00089	8.04991e-05	0.000278657	0.016693	7.3326e-06	1.00048	1.0004	0.253824	1.31416	75.2961	-0.661603	-37.9071	1.97577	113.203	-0.393992	0.919114	-0.661603	-37.9071	0.789008	-0.614382	-0.0161867	0.00408006	-0.96967	0.244417	2.89467	165.853	0.606689	0.794939	0.918907	52.6495	0.000280844	0.0167584	2.50702e+06	0.0175996	0.0175996	-0.0175955	-0.0175955	0.004231	0.004231	0.00424801
		528	1.01037	1.5115e+08	1.02085	1.00048	1.00041	0.0101844	0.0132263	2.00089	7.78604e-05	0.000278657	0.016693	7.80713e-06	1.00048	1.0004	0.245504	1.32276	75.7884	-0.657307	-37.6609	1.98006	113.449	-0.397937	0.917413	-0.657307	-37.6609	0.791641	-0.610987	-0.0161867	0.00408005	-0.96967	0.244417	2.89467	165.853	0.610099	0.792326	0.914611	52.4034	0.000281318	0.0167725	2.50914e+06	0.0175996	0.0175996	-0.0175955	-0.0175955	0.004231	0.004231	0.00424801
2016-05-13	133	529	1.01043	1.51158e+08	1.02097	1.00048	1.00041	0.0102413	0.0131822	2.00089	7.61362e-05	0.000278655	0.0166929	7.83082e-06	1.00047	1.0004	0.240068	1.32836	76.1095	-0.654505	-37.5004	1.98287	113.61	-0.400506	0.916294	-0.654505	-37.5004	0.79335	-0.608766	-0.0161805	0.00410447	-0.9693	0.245881	2.89316	165.766	0.61351	0.789687	0.910299	52.1563	0.000281342	0.0167732	2.50924e+06	0.0176065	0.0176065	-0.0176024	-0.0176024	0.0042066	0.0042066	0.00422362
		530	1.01048	1.51166e+08	1.02108	1.00048	1.00041	0.0102978	0.0131381	2.00089	7.36063e-05	0.000278654	0.0166929	7.4555e-06	1.00047	1.0004	0.23209	1.33657	76.5798	-0.6504	-37.2652	1.98697	113.845	-0.404264	0.914642	-0.6504	-37.2652	0.795842	-0.605505	-0.0161797	0.00410752	-0.969254	0.246063	2.89298	165.755	0.616894	0.787046	0.906006	51.9103	0.000280967	0.0167621	2.50757e+06	0.0176073	0.0176073	-0.0176033	-0.0176033	0.00420356	0.00420356	0.00422057
		531	1.01054	1.51174e+08	1.02119	1.00048	1.00041	0.0103543	0.0130936	2.00089	7.01412e-05	0.000278652	0.0166929	7.55416e-06	1.00047	1.0004	0.221164	1.34779	77.2226	-0.644791	-36.9438	1.99258	114.166	-0.409388	0.912361	-0.644791	-36.9438	0.799225	-0.601031	-0.016185	0.0040865	-0.969572	0.244805	2.89427	165.83	0.620281	0.78438	0.901695	51.6633	0.000281065	0.016765	2.50801e+06	0.0176013	0.0176013	-0.0175972	-0.0175972	0.00422451	0.00422451	0.00424152
		532	1.01059	1.51183e+08	1.0213	1.00048	1.00041	0.0104104	0.013049	2.00089	6.73961e-05	0.000278653	0.0166929	8.0168e-06	1.00047	1.0004	0.212509	1.35665	77.7306	-0.640358	-36.6898	1.99701	114.42	-0.413428	0.910537	-0.640358	-36.6898	0.801882	-0.597482	-0.0161856	0.00408424	-0.969607	0.244669	2.89441	165.838	0.623643	0.781709	0.897402	51.4173	0.000281528	0.0167788	2.51007e+06	0.0176007	0.0176007	-0.0175966	-0.0175966	0.00422677	0.00422677	0.00424378
2016-05-14	134	533	1.01065	1.51191e+08	1.02141	1.00048	1.00041	0.0104666	0.0130039	2.00089	6.57171e-05	0.00027865	0.0166928	7.95268e-06	1.00047	1.0004	0.207215	1.36207	78.0408	-0.63765	-36.5347	1.99972	114.575	-0.415892	0.909414	-0.63765	-36.5347	0.803497	-0.595309	-0.0161789	0.00411021	-0.969212	0.246226	2.89281	165.746	0.627009	0.779012	0.893088	51.1702	0.000281464	0.0167769	2.50979e+06	0.017608	0.017608	-0.0176039	-0.0176039	0.00420081	0.00420081	0.00421783
		534	1.0107	1.51199e+08	1.02152	1.00048	1.00041	0.0105223	0.0129588	2.00089	6.33328e-05	0.00027865	0.0166928	7.54001e-06	1.00047	1.00041	0.199697	1.36975	78.4808	-0.633811	-36.3147	2.00356	114.795	-0.41938	0.907811	-0.633811	-36.3147	0.805776	-0.59222	-0.016177	0.00411762	-0.9691	0.24667	2.89235	165.719	0.630351	0.77631	0.888791	50.924	0.000281051	0.0167646	2.50794e+06	0.0176101	0.0176101	-0.017606	-0.017606	0.00419342	0.00419342	0.00421044
		535	1.01076	1.51207e+08	1.02163	1.00047	1.00041	0.0105781	0.0129132	2.00089	6.00128e-05	0.000278649	0.0166928	7.60141e-06	1.00047	1.00041	0.189228	1.38042	79.0922	-0.628475	-36.009	2.00889	115.101	-0.424218	0.90556	-0.628475	-36.009	0.808925	-0.587912	-0.0161812	0.00410108	-0.969351	0.24568	2.89337	165.778	0.633695	0.773583	0.884477	50.6768	0.000281112	0.0167664	2.50822e+06	0.0176053	0.0176053	-0.0176013	-0.0176013	0.0042099	0.0042099	0.00422692
		536	1.01081	1.51215e+08	1.02174	1.00047	1.00042	0.0106335	0.0128677	2.00089	5.74618e-05	0.000278649	0.0166928	8.05146e-06	1.00047	1.00041	0.181185	1.38861	79.5612	-0.624382	-35.7745	2.01299	115.336	-0.427921	0.903816	-0.624382	-35.7745	0.811324	-0.584596	-0.0161803	0.00410439	-0.969301	0.245878	2.89317	165.766	0.637013	0.770853	0.88018	50.4306	0.000281562	0.0167798	2.51023e+06	0.0176063	0.0176063	-0.0176022	-0.0176022	0.0042066	0.0042066	0.00422362
2016-05-15	135	537	1.01087	1.51223e+08	1.02185	1.00047	1.00042	0.0106889	0.0128217	2.00089	5.57992e-05	0.000278648	0.0166928	8.06349e-06	1.00046	1.00041	0.175942	1.39393	79.8665	-0.621718	-35.6218	2.01565	115.488	-0.430327	0.902673	-0.621718	-35.6218	0.812879	-0.582433	-0.0161735	0.00413107	-0.968894	0.247477	2.89152	165.672	0.640332	0.768098	0.875866	50.1834	0.000281575	0.0167802	2.51028e+06	0.0176138	0.0176138	-0.0176098	-0.0176098	0.00417995	0.00417995	0.00419697
		538	1.01092	1.51231e+08	1.02196	1.00047	1.00042	0.0107439	0.0127757	2.00089	5.33044e-05	0.000278649	0.0166928	7.6637e-06	1.00046	1.00041	0.168076	1.40192	80.324	-0.617725	-35.3931	2.01964	115.717	-0.433928	0.900948	-0.617725	-35.3931	0.815198	-0.579182	-0.0161723	0.00413596	-0.968819	0.247769	2.89122	165.654	0.643625	0.765341	0.871571	49.9373	0.000281175	0.0167683	2.5085e+06	0.0176152	0.0176152	-0.0176112	-0.0176112	0.00417507	0.00417507	0.0041921
		539	1.01097	1.51239e+08	1.02207	1.00047	1.00042	0.0107989	0.0127292	2.00089	4.9824e-05	0.000278648	0.0166927	7.76276e-06	1.00046	1.00041	0.157102	1.41304	80.9613	-0.612164	-35.0744	2.02521	116.036	-0.438932	0.89852	-0.612164	-35.0744	0.818406	-0.57464	-0.0161774	0.00411578	-0.969127	0.246561	2.89246	165.726	0.646921	0.762557	0.867257	49.6902	0.000281274	0.0167712	2.50894e+06	0.0176095	0.0176095	-0.0176054	-0.0176054	0.00419521	0.00419521	0.00421223
		540	1.01103	1.51247e+08	1.02218	1.00047	1.00042	0.0108535	0.0126827	2.00089	4.71368e-05	0.000278648	0.0166928	8.26274e-06	1.00046	1.00041	0.148629	1.42161	81.4525	-0.607877	-34.8288	2.02949	116.281	-0.442779	0.896631	-0.607877	-34.8288	0.820862	-0.571126	-0.0161774	0.00411592	-0.969125	0.246569	2.89245	165.725	0.65019	0.759771	0.862962	49.4441	0.000281774	0.0167861	2.51117e+06	0.0176095	0.0176095	-0.0176055	-0.0176055	0.00419508	0.00419508	0.00421209
2016-05-16	136	541	1.01108	1.51256e+08	1.02228	1.00047	1.00042	0.0109081	0.0126357	2.00089	4.5388e-05	0.000278647	0.0166927	8.29947e-06	1.00046	1.00041	0.143115	1.42719	81.7719	-0.605091	-34.6691	2.03228	116.441	-0.445276	0.895393	-0.605091	-34.6691	0.822451	-0.568837	-0.016171	0.00414061	-0.968747	0.248049	2.89093	165.638	0.653462	0.756959	0.858648	49.1969	0.00028181	0.0167872	2.51133e+06	0.0176164	0.0176164	-0.0176124	-0.0176124	0.00417039	0.00417039	0.00418742
		542	1.01113	1.51263e+08	1.02239	1.00047	1.00042	0.0109623	0.0125887	2.00089	4.28825e-05	0.000278648	0.0166927	7.9622e-06	1.00046	1.00042	0.135214	1.43517	82.229	-0.601102	-34.4406	2.03627	116.67	-0.448845	0.89361	-0.601102	-34.4406	0.824713	-0.565551	-0.0161698	0.00414559	-0.968671	0.248347	2.89062	165.62	0.656708	0.754145	0.854351	48.9507	0.000281473	0.0167772	2.50983e+06	0.0176179	0.0176179	-0.0176138	-0.0176138	0.00416542	0.00416542	0.00418245
		543	1.01119	1.51271e+08	1.0225	1.00046	1.00043	0.0110165	0.0125413	2.00089	3.94649e-05	0.000278647	0.0166927	8.08685e-06	1.00046	1.00042	0.124438	1.44603	82.8517	-0.595668	-34.1292	2.0417	116.981	-0.453694	0.891158	-0.595668	-34.1292	0.827774	-0.561061	-0.0161744	0.00412749	-0.968949	0.247263	2.89174	165.684	0.659956	0.751304	0.850036	48.7035	0.000281598	0.0167809	2.51038e+06	0.0176128	0.0176128	-0.0176087	-0.0176087	0.00418351	0.00418351	0.00420053
		544	1.01124	1.51279e+08	1.0226	1.00046	1.00043	0.0110703	0.0124939	2.00089	3.68399e-05	0.000278648	0.0166928	8.61233e-06	1.00046	1.00042	0.116161	1.45437	83.3294	-0.591499	-33.8904	2.04587	117.22	-0.457405	0.889258	-0.591499	-33.8904	0.830106	-0.557606	-0.0161739	0.00412957	-0.968917	0.247387	2.89161	165.677	0.663178	0.748462	0.845739	48.4573	0.000282123	0.0167965	2.51272e+06	0.0176134	0.0176134	-0.0176093	-0.0176093	0.00418145	0.00418145	0.00419847
2016-05-17	137	545	1.01129	1.51287e+08	1.02271	1.00046	1.00043	0.0111241	0.012446	2.00089	3.51782e-05	0.000278648	0.0166928	8.66198e-06	1.00045	1.00042	0.110922	1.45965	83.6316	-0.588862	-33.7393	2.04851	117.371	-0.459748	0.888049	-0.588862	-33.7393	0.831573	-0.555415	-0.0161669	0.00415672	-0.9685	0.249013	2.88993	165.581	0.666402	0.745592	0.841423	48.21	0.000282173	0.016798	2.51295e+06	0.017621	0.017621	-0.017617	-0.017617	0.00415431	0.00415431	0.00417134
		546	1.01134	1.51295e+08	1.02282	1.00046	1.00043	0.0111774	0.0123981	2.00089	3.26075e-05	0.000278648	0.0166927	8.26172e-06	1.00045	1.00042	0.102816	1.4678	84.0987	-0.584786	-33.5058	2.05258	117.604	-0.463364	0.886168	-0.584786	-33.5058	0.83383	-0.552021	-0.016166	0.00416026	-0.968445	0.249226	2.88971	165.568	0.669599	0.742723	0.837128	47.9639	0.000281773	0.0167861	2.51116e+06	0.017622	0.017622	-0.017618	-0.017618	0.00415076	0.00415076	0.00416779
		547	1.0114	1.51303e+08	1.02292	1.00046	1.00043	0.0112308	0.0123497	2.00089	2.91488e-05	0.000278647	0.0166927	8.31112e-06	1.00045	1.00042	0.0919102	1.47876	84.7265	-0.579307	-33.1918	2.05806	117.918	-0.468213	0.883616	-0.579307	-33.1918	0.836842	-0.547444	-0.0161708	0.00414141	-0.968735	0.248097	2.89088	165.635	0.672796	0.739828	0.832814	47.7167	0.000281822	0.0167876	2.51138e+06	0.0176167	0.0176167	-0.0176126	-0.0176126	0.00416959	0.00416959	0.00418661
		548	1.01145	1.5131e+08	1.02303	1.00046	1.00043	0.0112837	0.0123014	2.00089	2.6507e-05	0.000278647	0.0166927	8.77362e-06	1.00045	1.00042	0.0835802	1.48712	85.2056	-0.575126	-32.9523	2.06224	118.158	-0.471903	0.881651	-0.575126	-32.9523	0.839124	-0.54394	-0.0161703	0.00414326	-0.968707	0.248208	2.89076	165.629	0.675968	0.736931	0.828519	47.4706	0.000282285	0.0168013	2.51344e+06	0.0176172	0.0176172	-0.0176132	-0.0176132	0.00416774	0.00416774	0.00418477
2016-05-18	138	549	1.0115	1.51318e+08	1.02313	1.00046	1.00043	0.0113367	0.0122526	2.00089	2.47773e-05	0.000278646	0.0166927	8.78569e-06	1.00045	1.00042	0.0781263	1.49259	85.5191	-0.57239	-32.7955	2.06498	118.315	-0.474313	0.880356	-0.57239	-32.7955	0.840609	-0.541642	-0.0161638	0.00416877	-0.968314	0.249736	2.88918	165.538	0.679141	0.734008	0.824205	47.2235	0.000282297	0.0168017	2.5135e+06	0.0176243	0.0176243	-0.0176203	-0.0176203	0.00414223	0.00414223	0.00415926
		550	1.01155	1.51326e+08	1.02323	1.00046	1.00043	0.0113892	0.0122038	2.00089	2.22645e-05	0.000278647	0.0166927	8.41097e-06	1.00045	1.00043	0.070203	1.50054	85.9744	-0.568417	-32.5679	2.06895	118.542	-0.477807	0.878465	-0.568417	-32.5679	0.842754	-0.538299	-0.0161624	0.00417401	-0.968233	0.25005	2.88886	165.52	0.682288	0.731083	0.819908	46.9773	0.000281922	0.0167905	2.51183e+06	0.0176258	0.0176258	-0.0176218	-0.0176218	0.004137	0.004137	0.00415403
		551	1.0116	1.51333e+08	1.02334	1.00045	1.00044	0.0114418	0.0121545	2.00089	1.87892e-05	0.000278646	0.0166927	8.52304e-06	1.00045	1.00043	0.0592448	1.51152	86.6035	-0.562927	-32.2533	2.07444	118.857	-0.482623	0.875828	-0.562927	-32.2533	0.845697	-0.533663	-0.0161673	0.00415502	-0.968526	0.248913	2.89004	165.587	0.685438	0.728131	0.815592	46.73	0.000282034	0.0167939	2.51233e+06	0.0176205	0.0176205	-0.0176164	-0.0176164	0.00415598	0.00415598	0.004173
		552	1.01165	1.51341e+08	1.02344	1.00045	1.00044	0.0114939	0.0121052	2.00089	1.61301e-05	0.000278646	0.0166927	9.04814e-06	1.00044	1.00043	0.0508605	1.51991	87.0846	-0.558728	-32.0128	2.07864	119.097	-0.486296	0.873794	-0.558728	-32.0128	0.84793	-0.530108	-0.0161669	0.00415664	-0.968501	0.24901	2.88994	165.581	0.688561	0.725178	0.811293	46.4837	0.000282559	0.0168095	2.51466e+06	0.0176209	0.0176209	-0.0176169	-0.0176169	0.00415436	0.00415436	0.00417139
2016-05-19	139	553	1.0117	1.51349e+08	1.02355	1.00045	1.00044	0.0115461	0.0120554	2.00089	1.43827e-05	0.000278646	0.0166927	9.1229e-06	1.00044	1.00043	0.0453505	1.52543	87.4007	-0.55597	-31.8547	2.0814	119.255	-0.488704	0.87245	-0.55597	-31.8547	0.849389	-0.527767	-0.0161604	0.00418184	-0.968112	0.250519	2.88838	165.492	0.691686	0.722199	0.806976	46.2363	0.000282634	0.0168117	2.515e+06	0.017628	0.017628	-0.017624	-0.017624	0.00412915	0.00412915	0.00414619
		554	1.01175	1.51356e+08	1.02365	1.00045	1.00044	0.0115978	0.0120057	2.00089	1.16998e-05	0.000278645	0.0166927	8.73493e-06	1.00044	1.00043	0.0368911	1.5339	87.8858	-0.551737	-31.6122	2.08563	119.498	-0.492393	0.870373	-0.551737	-31.6122	0.851616	-0.524167	-0.0161601	0.00418287	-0.968096	0.250581	2.88831	165.488	0.694783	0.71922	0.802679	45.9901	0.000282246	0.0168002	2.51327e+06	0.0176282	0.0176282	-0.0176242	-0.0176242	0.00412811	0.00412811	0.00414515
		555	1.0118	1.51364e+08	1.02375	1.00045	1.00044	0.0116495	0.0119555	2.00089	8.17739e-06	0.000278645	0.0166927	8.77208e-06	1.00044	1.00043	0.0257844	1.54501	88.5225	-0.54618	-31.2938	2.09119	119.816	-0.497221	0.867624	-0.54618	-31.2938	0.854515	-0.519427	-0.0161653	0.0041628	-0.968406	0.249379	2.88955	165.559	0.697879	0.716215	0.798364	45.7429	0.000282283	0.0168013	2.51344e+06	0.0176226	0.0176226	-0.0176186	-0.0176186	0.00414818	0.00414818	0.00416521
		556	1.01185	1.51371e+08	1.02385	1.00045	1.00044	0.0117007	0.0119054	2.00089	5.52017e-06	0.000278644	0.0166926	9.24688e-06	1.00044	1.00043	0.0174058	1.55339	89.0027	-0.54199	-31.0537	2.09538	120.056	-0.500853	0.865533	-0.54199	-31.0537	0.856684	-0.515842	-0.0161648	0.0041645	-0.96838	0.249481	2.88945	165.553	0.70095	0.713211	0.794068	45.4968	0.000282758	0.0168154	2.51555e+06	0.0176231	0.0176231	-0.0176191	-0.0176191	0.00414647	0.00414647	0.0041635
2016-05-20	140	557	1.01191	1.51379e+08	1.02395	1.00045	1.00044	0.0117519	0.0118548	2.00089	3.74866e-06	0.000278644	0.0166926	9.28407e-06	1.00044	1.00044	0.01182	1.55898	89.3227	-0.539197	-30.8937	2.09817	120.216	-0.503268	0.86413	-0.539197	-30.8937	0.858121	-0.513447	-0.0161584	0.00418909	-0.967999	0.250954	2.88793	165.466	0.70402	0.71018	0.789754	45.2495	0.000282795	0.0168165	2.51571e+06	0.0176299	0.0176299	-0.0176259	-0.0176259	0.00412186	0.00412186	0.0041389
		558	1.01195	1.51386e+08	1.02405	1.00045	1.00045	0.0118028	0.0118042	2.00089	1.21833e-06	0.000278644	0.0166926	8.94697e-06	1.00044	1.00044	0.00384155	1.56695	89.7799	-0.535208	-30.6651	2.10216	120.445	-0.506712	0.862116	-0.535208	-30.6651	0.860163	-0.51002	-0.0161572	0.00419409	-0.967921	0.251254	2.88762	165.448	0.707067	0.707147	0.785455	45.0033	0.000282458	0.0168065	2.51421e+06	0.0176313	0.0176313	-0.0176273	-0.0176273	0.00411687	0.00411687	0.00413391
		559	1.012	1.51394e+08	1.02415	1.00044	1.00045	0.0118537	0.0117531	2.00089	-2.20152e-06	0.000278645	0.0166927	9.05981e-06	1.00044	1.00044	-0.00694168	1.57774	90.3977	-0.529816	-30.3562	2.10755	120.754	-0.511352	0.859371	-0.529816	-30.3562	0.8629	-0.505375	-0.0161617	0.00417673	-0.968191	0.250214	2.88869	165.51	0.710113	0.704088	0.781138	44.7559	0.000282571	0.0168098	2.51472e+06	0.0176265	0.0176265	-0.0176225	-0.0176225	0.00413425	0.00413425	0.00415128
		560	1.01205	1.51401e+08	1.02425	1.00044	1.00045	0.0119041	0.011702	2.00089	-4.8061e-06	0.000278646	0.0166927	9.58549e-06	1.00043	1.00044	-0.0151543	1.58595	90.8683	-0.525709	-30.1209	2.11166	120.989	-0.514877	0.857264	-0.525709	-30.1209	0.864968	-0.501827	-0.0161609	0.00417987	-0.968142	0.250401	2.8885	165.499	0.713134	0.701028	0.776838	44.5095	0.000283097	0.0168255	2.51705e+06	0.0176274	0.0176274	-0.0176234	-0.0176234	0.00413113	0.00413113	0.00414816
2016-05-21	141	561	1.0121	1.51408e+08	1.02435	1.00044	1.00045	0.0119546	0.0116506	2.00089	-6.52547e-06	0.000278648	0.0166927	9.67367e-06	1.00043	1.00044	-0.0205757	1.59137	91.179	-0.522998	-29.9656	2.11437	121.145	-0.517199	0.855865	-0.522998	-29.9656	0.866326	-0.49948	-0.0161542	0.00420586	-0.967738	0.251957	2.88689	165.407	0.716155	0.697941	0.772519	44.2621	0.000283185	0.0168281	2.51745e+06	0.0176347	0.0176347	-0.0176307	-0.0176307	0.00410513	0.00410513	0.00412217
		562	1.01215	1.51416e+08	1.02445	1.00044	1.00045	0.0120045	0.0115991	2.00089	-9.25721e-06	0.000278647	0.0166927	9.26098e-06	1.00043	1.00044	-0.0291892	1.59999	91.6727	-0.51869	-29.7188	2.11868	121.391	-0.520882	0.853629	-0.51869	-29.7188	0.868469	-0.495743	-0.0161542	0.00420569	-0.967741	0.251947	2.8869	165.407	0.719148	0.694857	0.768221	44.0158	0.000282772	0.0168158	2.51561e+06	0.0176346	0.0176346	-0.0176307	-0.0176307	0.00410529	0.00410529	0.00412234
		563	1.0122	1.51423e+08	1.02455	1.00044	1.00045	0.0120545	0.0115472	2.00089	-1.28049e-05	0.000278648	0.0166927	9.26124e-06	1.00043	1.00044	-0.0403754	1.61118	92.314	-0.513094	-29.3981	2.12428	121.712	-0.525651	0.8507	-0.513094	-29.3981	0.87123	-0.490875	-0.0161596	0.004185	-0.968063	0.250707	2.88818	165.481	0.72214	0.691747	0.763905	43.7686	0.000282772	0.0168158	2.51561e+06	0.0176289	0.0176289	-0.0176249	-0.0176249	0.00412602	0.00412602	0.00414306
		564	1.01225	1.5143e+08	1.02465	1.00044	1.00045	0.012104	0.0114953	2.00089	-1.54884e-05	0.000278648	0.0166928	9.69896e-06	1.00043	1.00044	-0.0488369	1.61965	92.7993	-0.508859	-29.1555	2.12851	121.955	-0.529249	0.848467	-0.508859	-29.1555	0.873301	-0.487181	-0.0161594	0.00418601	-0.968047	0.250768	2.88812	165.477	0.725106	0.688637	0.759608	43.5223	0.00028321	0.0168288	2.51756e+06	0.0176292	0.0176292	-0.0176252	-0.0176252	0.00412501	0.00412501	0.00414205
2016-05-22	142	565	1.0123	1.51437e+08	1.02475	1.00044	1.00046	0.0121535	0.0114429	2.00089	-1.73378e-05	0.000278649	0.0166928	9.72455e-06	1.00043	1.00045	-0.0546684	1.62549	93.1338	-0.505939	-28.9882	2.13143	122.122	-0.531724	0.846918	-0.505939	-28.9882	0.87472	-0.484629	-0.0161535	0.00420857	-0.967696	0.252119	2.88672	165.397	0.728071	0.685501	0.755292	43.2751	0.000283236	0.0168296	2.51767e+06	0.0176355	0.0176355	-0.0176315	-0.0176315	0.00410244	0.00410244	0.00411948
		566	1.01234	1.51445e+08	1.02484	1.00044	1.00046	0.0122026	0.0113906	2.00089	-2.01242e-05	0.000278649	0.0166928	9.28712e-06	1.00043	1.00045	-0.0634543	1.63429	93.6381	-0.501538	-28.736	2.13583	122.374	-0.535446	0.84457	-0.501538	-28.736	0.876844	-0.480775	-0.016154	0.00420689	-0.967723	0.252018	2.88683	165.403	0.73101	0.682367	0.750996	43.0289	0.000282798	0.0168166	2.51573e+06	0.017635	0.017635	-0.017631	-0.017631	0.00410413	0.00410413	0.00412117
		567	1.01239	1.51452e+08	1.02494	1.00043	1.00046	0.0122516	0.0113379	2.00089	-2.37024e-05	0.000278651	0.0166928	9.25037e-06	1.00043	1.00045	-0.0747367	1.6456	94.2861	-0.495884	-28.412	2.14149	122.698	-0.540213	0.841528	-0.495884	-28.412	0.879549	-0.475809	-0.0161597	0.00418523	-0.96806	0.25072	2.88817	165.48	0.733946	0.679207	0.746682	42.7817	0.000282761	0.0168155	2.51556e+06	0.017629	0.017629	-0.017625	-0.017625	0.00412583	0.00412583	0.00414286
		568	1.01244	1.51459e+08	1.02503	1.00043	1.00046	0.0123002	0.0112852	2.00089	-2.63181e-05	0.00027865	0.0166928	9.70038e-06	1.00042	1.00045	-0.0829844	1.65388	94.7601	-0.491747	-28.175	2.14562	122.935	-0.543689	0.839286	-0.491747	-28.175	0.881509	-0.472166	-0.016159	0.00418777	-0.96802	0.250872	2.88801	165.471	0.736856	0.67605	0.742388	42.5357	0.000283211	0.0168289	2.51757e+06	0.0176297	0.0176297	-0.0176257	-0.0176257	0.00412328	0.00412328	0.00414032
2016-05-23	143	569	1.01249	1.51466e+08	1.02513	1.00043	1.00046	0.0123488	0.011232	2.00089	-2.79991e-05	0.00027865	0.0166928	9.68777e-06	1.00042	1.00045	-0.088285	1.6592	95.065	-0.489087	-28.0226	2.14828	123.088	-0.54592	0.837837	-0.489087	-28.0226	0.882762	-0.46982	-0.016152	0.0042145	-0.967604	0.252474	2.88636	165.376	0.739766	0.672864	0.738073	42.2885	0.000283199	0.0168285	2.51751e+06	0.0176371	0.0176371	-0.0176332	-0.0176332	0.00409651	0.00409651	0.00411356
		570	1.01253	1.51473e+08	1.02522	1.00043	1.00046	0.0123969	0.0111788	2.00089	-3.05164e-05	0.00027865	0.0166928	9.26268e-06	1.00042	1.00045	-0.0962224	1.66717	95.5217	-0.485101	-27.7942	2.15227	123.316	-0.549255	0.835655	-0.485101	-27.7942	0.884628	-0.466298	-0.0161507	0.00421954	-0.967525	0.252776	2.88604	165.358	0.742651	0.669678	0.733775	42.0422	0.000282774	0.0168159	2.51562e+06	0.0176385	0.0176385	-0.0176346	-0.0176346	0.00409146	0.00409146	0.0041085
		571	1.01258	1.5148e+08	1.02532	1.00043	1.00046	0.0124451	0.0111252	2.00089	-3.39249e-05	0.00027865	0.0166928	9.28781e-06	1.00042	1.00045	-0.10697	1.67797	96.1407	-0.479699	-27.4848	2.15767	123.625	-0.553761	0.832676	-0.479699	-27.4848	0.887134	-0.461513	-0.0161553	0.00420203	-0.967798	0.251727	2.88713	165.42	0.745536	0.666465	0.729458	41.7949	0.000282799	0.0168166	2.51573e+06	0.0176337	0.0176337	-0.0176297	-0.0176297	0.00410899	0.00410899	0.00412604
		572	1.01263	1.51487e+08	1.02541	1.00043	1.00046	0.0124928	0.0110715	2.00089	-3.65197e-05	0.00027865	0.0166928	9.72554e-06	1.00042	1.00046	-0.115151	1.6862	96.6124	-0.475583	-27.2489	2.16179	123.861	-0.557184	0.830389	-0.475583	-27.2489	0.889026	-0.457857	-0.0161545	0.00420502	-0.967752	0.251906	2.88694	165.41	0.748396	0.663252	0.725156	41.5484	0.000283237	0.0168296	2.51768e+06	0.0176345	0.0176345	-0.0176305	-0.0176305	0.004106	0.004106	0.00412304
2016-05-24	144	573	1.01267	1.51494e+08	1.02551	1.00043	1.00047	0.0125406	0.0110175	2.00089	-3.83573e-05	0.000278652	0.0166929	9.78924e-06	1.00042	1.00046	-0.120946	1.69204	96.9467	-0.472666	-27.0817	2.1647	124.028	-0.559604	0.82876	-0.472666	-27.0817	0.890358	-0.455261	-0.0161486	0.00422766	-0.967398	0.253262	2.88554	165.329	0.751253	0.660014	0.720838	41.301	0.0002833	0.0168315	2.51796e+06	0.0176408	0.0176408	-0.0176369	-0.0176369	0.00408335	0.00408335	0.0041004
		574	1.01272	1.51501e+08	1.0256	1.00043	1.00047	0.0125878	0.0109635	2.00089	-4.11582e-05	0.000278652	0.0166929	9.37709e-06	1.00042	1.00046	-0.129777	1.70094	97.4567	-0.468215	-26.8267	2.16916	124.283	-0.563287	0.826261	-0.468215	-26.8267	0.892375	-0.451294	-0.0161493	0.00422522	-0.967436	0.253115	2.88569	165.338	0.754084	0.656778	0.716538	41.0546	0.000282888	0.0168193	2.51613e+06	0.0176402	0.0176402	-0.0176362	-0.0176362	0.00408581	0.00408581	0.00410286
		575	1.01277	1.51508e+08	1.02569	1.00042	1.00047	0.0126351	0.0109091	2.00089	-4.47272e-05	0.000278655	0.016693	9.35345e-06	1.00041	1.00046	-0.141031	1.7123	98.1075	-0.462536	-26.5013	2.17483	124.609	-0.567971	0.823049	-0.462536	-26.5013	0.894924	-0.446219	-0.0161551	0.00420323	-0.96778	0.251797	2.88706	165.416	0.756912	0.653517	0.712222	40.8073	0.000282864	0.0168186	2.51602e+06	0.0176342	0.0176342	-0.0176302	-0.0176302	0.00410787	0.00410787	0.00412491
		576	1.01281	1.51514e+08	1.02579	1.00042	1.00047	0.0126819	0.0108547	2.00089	-4.73102e-05	0.000278655	0.016693	9.82872e-06	1.00041	1.00046	-0.149175	1.72053	98.5791	-0.45842	-26.2655	2.17895	124.845	-0.571353	0.820704	-0.45842	-26.2655	0.896753	-0.442532	-0.0161544	0.00420617	-0.967734	0.251972	2.88687	165.406	0.759713	0.650258	0.707924	40.5611	0.00028334	0.0168327	2.51814e+06	0.017635	0.017635	-0.017631	-0.017631	0.00410493	0.00410493	0.00412198
2016-05-25	145	577	1.01286	1.51521e+08	1.02588	1.00042	1.00047	0.0127286	0.0107999	2.00089	-4.90607e-05	0.000278656	0.016693	9.89212e-06	1.00041	1.00046	-0.154695	1.72611	98.8991	-0.455628	-26.1055	2.18174	125.005	-0.573643	0.819106	-0.455628	-26.1055	0.897985	-0.440026	-0.016148	0.00423079	-0.967349	0.253447	2.88535	165.318	0.762513	0.646973	0.703608	40.3138	0.000283403	0.0168346	2.51842e+06	0.0176418	0.0176418	-0.0176379	-0.0176379	0.00408028	0.00408028	0.00409733
		578	1.0129	1.51528e+08	1.02597	1.00042	1.00047	0.0127749	0.0107451	2.00089	-5.18004e-05	0.000278656	0.016693	9.46693e-06	1.00041	1.00046	-0.163334	1.73486	99.4004	-0.451253	-25.8549	2.18612	125.255	-0.577221	0.816588	-0.451253	-25.8549	0.899902	-0.436093	-0.0161483	0.00422953	-0.967369	0.253372	2.88543	165.323	0.765286	0.643691	0.699311	40.0676	0.000282978	0.0168219	2.51653e+06	0.0176415	0.0176415	-0.0176375	-0.0176375	0.00408154	0.00408154	0.00409859
		579	1.01295	1.51535e+08	1.02606	1.00042	1.00047	0.0128212	0.0106899	2.00089	-5.53334e-05	0.000278657	0.016693	9.44268e-06	1.00041	1.00046	-0.174474	1.74617	100.048	-0.445601	-25.5311	2.19177	125.579	-0.581826	0.813313	-0.445601	-25.5311	0.902352	-0.431001	-0.0161539	0.00420796	-0.967707	0.252079	2.88676	165.399	0.768056	0.640382	0.694996	39.8203	0.000282954	0.0168212	2.51642e+06	0.0176355	0.0176355	-0.0176316	-0.0176316	0.00410316	0.00410316	0.0041202
		580	1.01299	1.51541e+08	1.02615	1.00042	1.00048	0.012867	0.0106347	2.00089	-5.7955e-05	0.000278657	0.016693	9.88023e-06	1.00041	1.00047	-0.18274	1.75457	100.529	-0.441401	-25.2904	2.19597	125.82	-0.585238	0.810862	-0.441401	-25.2904	0.904154	-0.427206	-0.0161535	0.00420953	-0.967682	0.252173	2.88667	165.394	0.770802	0.637075	0.690698	39.5741	0.000283391	0.0168342	2.51836e+06	0.017636	0.017636	-0.017632	-0.017632	0.00410159	0.00410159	0.00411863
2016-05-26	146	581	1.01304	1.51548e+08	1.02624	1.00042	1.00048	0.0129128	0.0105791	2.00089	-5.97194e-05	0.000278657	0.016693	9.89336e-06	1.00041	1.00047	-0.188303	1.76023	100.854	-0.43857	-25.1282	2.1988	125.982	-0.587531	0.809202	-0.43857	-25.1282	0.90536	-0.424645	-0.0161473	0.00423355	-0.967306	0.253612	2.88518	165.309	0.773545	0.633741	0.68638	39.3267	0.000283404	0.0168346	2.51842e+06	0.0176426	0.0176426	-0.0176387	-0.0176387	0.00407753	0.00407753	0.00409459
		582	1.01308	1.51555e+08	1.02633	1.00042	1.00048	0.0129582	0.0105234	2.00089	-6.24228e-05	0.000278657	0.016693	9.44314e-06	1.00041	1.00047	-0.196827	1.76892	101.351	-0.434226	-24.8793	2.20314	126.231	-0.59104	0.806642	-0.434226	-24.8793	0.907196	-0.420709	-0.0161474	0.00423284	-0.967317	0.25357	2.88522	165.311	0.776263	0.630409	0.68208	39.0803	0.000282954	0.0168212	2.51642e+06	0.0176424	0.0176424	-0.0176385	-0.0176385	0.00407823	0.00407823	0.00409529
		583	1.01312	1.51561e+08	1.02642	1.00041	1.00048	0.0130035	0.0104674	2.00089	-6.58211e-05	0.000278659	0.0166931	9.34448e-06	1.0004	1.00047	-0.207543	1.77986	101.978	-0.428756	-24.5659	2.20861	126.544	-0.595444	0.803397	-0.428756	-24.5659	0.909484	-0.415739	-0.0161524	0.00421421	-0.967609	0.252452	2.88638	165.377	0.778976	0.627053	0.677764	38.833	0.000282855	0.0168183	2.51598e+06	0.0176373	0.0176373	-0.0176334	-0.0176334	0.00409694	0.00409694	0.00411398
		584	1.01317	1.51568e+08	1.02651	1.00041	1.00048	0.0130484	0.0104115	2.00089	-6.82345e-05	0.000278658	0.0166931	9.74455e-06	1.0004	1.00047	-0.215153	1.78764	102.424	-0.424863	-24.3428	2.21251	126.767	-0.598567	0.801073	-0.424863	-24.3428	0.911095	-0.412196	-0.0161507	0.00422074	-0.967507	0.252844	2.88597	165.354	0.781664	0.6237	0.673467	38.5868	0.000283256	0.0168302	2.51776e+06	0.0176391	0.0176391	-0.0176352	-0.0176352	0.00409039	0.00409039	0.00410744
2016-05-27	147	585	1.01321	1.51574e+08	1.0266	1.00041	1.00048	0.0130932	0.0103551	2.00089	-6.9867e-05	0.00027866	0.0166931	9.75819e-06	1.0004	1.00047	-0.2203	1.79292	102.727	-0.422226	-24.1918	2.21514	126.918	-0.600677	0.799492	-0.422226	-24.1918	0.912179	-0.409792	-0.0161436	0.00424786	-0.967081	0.254468	2.8843	165.258	0.784348	0.620321	0.669151	38.3396	0.000283269	0.0168306	2.51782e+06	0.0176466	0.0176466	-0.0176427	-0.0176427	0.00406323	0.00406323	0.00408029
		586	1.01325	1.51581e+08	1.02669	1.00041	1.00048	0.0131376	0.0102987	2.00089	-7.25151e-05	0.000278659	0.0166931	9.27039e-06	1.0004	1.00047	-0.22865	1.80149	103.218	-0.417942	-23.9463	2.21943	127.164	-0.604097	0.796911	-0.417942	-23.9463	0.913926	-0.40588	-0.0161435	0.00424805	-0.967078	0.25448	2.88428	165.257	0.787007	0.616945	0.664855	38.0934	0.000282781	0.0168161	2.51565e+06	0.0176467	0.0176467	-0.0176427	-0.0176427	0.00406302	0.00406302	0.00408007
		587	1.0133	1.51587e+08	1.02677	1.00041	1.00048	0.0131819	0.010242	2.00089	-7.59328e-05	0.000278661	0.0166931	9.17135e-06	1.0004	1.00047	-0.239426	1.81257	103.853	-0.412399	-23.6287	2.22497	127.481	-0.608504	0.793551	-0.412399	-23.6287	0.916162	-0.400809	-0.0161488	0.00422825	-0.96739	0.253293	2.88551	165.328	0.789661	0.613543	0.66054	37.8461	0.000282682	0.0168132	2.51521e+06	0.0176413	0.0176413	-0.0176373	-0.0176373	0.00408289	0.00408289	0.00409994
		588	1.01334	1.51594e+08	1.02686	1.00041	1.00049	0.0132258	0.0101852	2.00089	-7.83908e-05	0.00027866	0.0166931	9.55861e-06	1.0004	1.00048	-0.247176	1.82056	104.31	-0.408404	-23.3998	2.22897	127.71	-0.61167	0.791113	-0.408404	-23.3998	0.917756	-0.397145	-0.0161475	0.00423312	-0.967313	0.253585	2.88521	165.31	0.792291	0.610144	0.656242	37.5999	0.00028307	0.0168247	2.51694e+06	0.0176426	0.0176426	-0.0176386	-0.0176386	0.004078	0.004078	0.00409505
2016-05-28	148	589	1.01338	1.516e+08	1.02695	1.00041	1.00049	0.0132697	0.0101281	2.00089	-8.01189e-05	0.000278661	0.0166932	9.58478e-06	1.0004	1.00048	-0.252625	1.82619	104.633	-0.40559	-23.2386	2.23178	127.872	-0.613893	0.789389	-0.40559	-23.2386	0.91887	-0.394561	-0.0161411	0.00425737	-0.966931	0.255037	2.88371	165.224	0.794916	0.60672	0.651928	37.3527	0.000283096	0.0168255	2.51705e+06	0.0176493	0.0176493	-0.0176454	-0.0176454	0.00405371	0.00405371	0.00407077
		590	1.01343	1.51606e+08	1.02703	1.0004	1.00049	0.0133131	0.0100709	2.00089	-8.2787e-05	0.000278661	0.0166931	9.14743e-06	1.0004	1.00048	-0.261039	1.83489	105.132	-0.401238	-22.9892	2.23613	128.121	-0.617323	0.78671	-0.401238	-22.9892	0.920578	-0.390558	-0.0161414	0.00425648	-0.966945	0.254983	2.88376	165.227	0.797516	0.603298	0.64763	37.1065	0.000282658	0.0168124	2.51511e+06	0.017649	0.017649	-0.0176451	-0.0176451	0.0040546	0.0040546	0.00407166
		591	1.01347	1.51613e+08	1.02712	1.0004	1.00049	0.0133564	0.0100135	2.00089	-8.61759e-05	0.000278664	0.0166932	9.07418e-06	1.00039	1.00048	-0.271724	1.84598	105.767	-0.395695	-22.6716	2.24168	128.439	-0.621675	0.783276	-0.395695	-22.6716	0.922729	-0.385449	-0.0161467	0.00423667	-0.967258	0.253796	2.88499	165.298	0.800112	0.599851	0.643315	36.8592	0.000282585	0.0168103	2.51478e+06	0.0176437	0.0176437	-0.0176397	-0.0176397	0.00407451	0.00407451	0.00409156
		592	1.01351	1.51619e+08	1.0272	1.0004	1.00049	0.0133994	0.00995597	2.00089	-8.86302e-05	0.000278665	0.0166933	9.4748e-06	1.00039	1.00048	-0.279463	1.85403	106.228	-0.39167	-22.441	2.2457	128.669	-0.624822	0.780767	-0.39167	-22.441	0.924273	-0.381732	-0.0161455	0.00424108	-0.967189	0.254059	2.88472	165.282	0.802682	0.596407	0.639017	36.613	0.000282986	0.0168222	2.51656e+06	0.0176449	0.0176449	-0.017641	-0.017641	0.0040701	0.0040701	0.00408715
2016-05-29	149	593	1.01355	1.51625e+08	1.02729	1.0004	1.00049	0.0134423	0.00989806	2.00089	-9.02288e-05	0.000278667	0.0166933	9.45129e-06	1.00039	1.00048	-0.284503	1.85928	106.529	-0.389043	-22.2905	2.24833	128.82	-0.626871	0.779123	-0.389043	-22.2905	0.925273	-0.379303	-0.0161384	0.0042684	-0.966758	0.255695	2.88303	165.185	0.80525	0.592935	0.634699	36.3656	0.000282962	0.0168215	2.51646e+06	0.0176525	0.0176525	-0.0176486	-0.0176486	0.00404273	0.00404273	0.00405979
		594	1.01359	1.51631e+08	1.02737	1.0004	1.00049	0.0134847	0.00984015	2.00089	-9.28441e-05	0.000278666	0.0166933	8.92618e-06	1.00039	1.00048	-0.29275	1.8679	107.023	-0.384736	-22.0438	2.25263	129.066	-0.630221	0.776416	-0.384736	-22.0438	0.926897	-0.375315	-0.0161384	0.0042683	-0.966759	0.255689	2.88303	165.186	0.807793	0.589467	0.630398	36.1192	0.000282437	0.0168059	2.51412e+06	0.0176524	0.0176524	-0.0176485	-0.0176485	0.00404282	0.00404282	0.00405988
		595	1.01363	1.51637e+08	1.02745	1.0004	1.00049	0.0135272	0.00978188	2.00089	-9.61557e-05	0.000278669	0.0166934	8.75288e-06	1.00039	1.00048	-0.303192	1.87884	107.649	-0.379267	-21.7304	2.2581	129.38	-0.634458	0.772957	-0.379267	-21.7304	0.928936	-0.370239	-0.0161434	0.00424972	-0.967053	0.254575	2.88418	165.252	0.81033	0.585974	0.626081	35.8718	0.000282264	0.0168007	2.51335e+06	0.0176474	0.0176474	-0.0176435	-0.0176435	0.0040615	0.0040615	0.00407855
		596	1.01367	1.51643e+08	1.02753	1.0004	1.0005	0.0135691	0.00972362	2.00089	-9.84347e-05	0.000278668	0.0166934	9.1027e-06	1.00039	1.00049	-0.310378	1.88639	108.082	-0.375492	-21.5141	2.26188	129.596	-0.637371	0.770557	-0.375492	-21.5141	0.930327	-0.36673	-0.0161411	0.00425817	-0.966919	0.255082	2.88366	165.222	0.812842	0.582485	0.621782	35.6255	0.000282614	0.0168111	2.51491e+06	0.0176497	0.0176497	-0.0176458	-0.0176458	0.004053	0.004053	0.00407006
2016-05-30	150	597	1.01371	1.5165e+08	1.02762	1.0004	1.0005	0.013611	0.00966505	2.00089	-0.000100086	0.000278671	0.0166935	9.1421e-06	1.00039	1.00049	-0.315584	1.89187	108.396	-0.372751	-21.3571	2.26462	129.753	-0.639481	0.768807	-0.372751	-21.3571	0.931329	-0.364179	-0.0161345	0.00428359	-0.966517	0.256603	2.88209	165.131	0.815347	0.578972	0.617468	35.3783	0.000282653	0.0168123	2.51508e+06	0.0176567	0.0176567	-0.0176528	-0.0176528	0.00402754	0.00402754	0.00404461
		598	1.01375	1.51656e+08	1.0277	1.00039	1.0005	0.0136524	0.00960647	2.00089	-0.000102754	0.000278671	0.0166934	8.67981e-06	1.00039	1.00049	-0.323997	1.90075	108.905	-0.368311	-21.1027	2.26906	130.007	-0.642888	0.76596	-0.368311	-21.1027	0.932937	-0.36004	-0.0161351	0.00428128	-0.966554	0.256465	2.88223	165.14	0.817827	0.575464	0.613171	35.1321	0.000282191	0.0167985	2.51303e+06	0.0176561	0.0176561	-0.0176522	-0.0176522	0.00402986	0.00402986	0.00404692
		599	1.01379	1.51662e+08	1.02778	1.00039	1.0005	0.0136938	0.00954753	2.00089	-0.000106144	0.000278674	0.0166935	8.58179e-06	1.00038	1.00049	-0.334685	1.91207	109.553	-0.362651	-20.7784	2.27472	130.332	-0.647213	0.762309	-0.362651	-20.7784	0.93496	-0.354754	-0.0161409	0.00425959	-0.966898	0.255164	2.88358	165.217	0.820303	0.57193	0.608856	34.8849	0.000282093	0.0167956	2.51259e+06	0.0176503	0.0176503	-0.0176463	-0.0176463	0.00405167	0.00405167	0.00406873
		600	1.01383	1.51668e+08	1.02786	1.00039	1.0005	0.0137347	0.0094886	2.00089	-0.000108575	0.000278675	0.0166935	8.96981e-06	1.00038	1.00049	-0.342353	1.92022	110.02	-0.358577	-20.5449	2.27879	130.565	-0.650313	0.759666	-0.358577	-20.5449	0.936397	-0.350942	-0.01614	0.0042632	-0.966841	0.25538	2.88335	165.204	0.822753	0.568399	0.604559	34.6387	0.000282481	0.0168072	2.51432e+06	0.0176513	0.0176513	-0.0176473	-0.0176473	0.00404805	0.00404805	0.00406511
2016-05-31	151	601	1.01387	1.51673e+08	1.02794	1.00039	1.0005	0.0137756	0.00942928	2.00089	-0.000110253	0.000278678	0.0166937	8.98436e-06	1.00038	1.00049	-0.347644	1.92585	110.343	-0.355758	-20.3835	2.28161	130.727	-0.652452	0.75783	-0.355758	-20.3835	0.937383	-0.348301	-0.0161337	0.0042874	-0.966457	0.256828	2.88185	165.118	0.825199	0.564842	0.600242	34.3913	0.000282495	0.0168076	2.51438e+06	0.017658	0.017658	-0.0176541	-0.0176541	0.00402382	0.00402382	0.00404088
		602	1.01391	1.51679e+08	1.02802	1.00039	1.0005	0.0138159	0.00936996	2.00089	-0.00011305	0.000278676	0.0166936	8.44646e-06	1.00038	1.00049	-0.356463	1.93528	110.883	-0.351047	-20.1135	2.28632	130.997	-0.656015	0.754748	-0.351047	-20.1135	0.939013	-0.343881	-0.0161354	0.00428072	-0.966563	0.256428	2.88227	165.142	0.827619	0.561291	0.595944	34.1451	0.000281957	0.0167916	2.51199e+06	0.0176561	0.0176561	-0.0176522	-0.0176522	0.00403051	0.00403051	0.00404757
		603	1.01395	1.51685e+08	1.0281	1.00039	1.0005	0.0138563	0.00931034	2.00089	-0.000116471	0.000278679	0.0166937	8.22337e-06	1.00038	1.0005	-0.367247	1.94684	111.546	-0.345263	-19.7821	2.29211	131.328	-0.660369	0.750941	-0.345263	-19.7821	0.940986	-0.338444	-0.0161418	0.004257	-0.966939	0.255006	2.88374	165.226	0.830032	0.557716	0.591631	33.898	0.000281734	0.0167849	2.51099e+06	0.0176497	0.0176497	-0.0176458	-0.0176458	0.00405435	0.00405435	0.00407141
		604	1.01399	1.51691e+08	1.02818	1.00039	1.0005	0.0138961	0.00925071	2.00089	-0.000118834	0.000278678	0.0166937	8.53555e-06	1.00038	1.0005	-0.374701	1.95487	112.006	-0.34125	-19.5522	2.29612	131.558	-0.663378	0.748285	-0.34125	-19.5522	0.942337	-0.334665	-0.0161405	0.00426154	-0.966867	0.255279	2.88346	165.21	0.83242	0.554146	0.587336	33.6519	0.000282047	0.0167942	2.51238e+06	0.0176509	0.0176509	-0.017647	-0.017647	0.00404977	0.00404977	0.00406683
2016-06-01	152	605	1.01403	1.51697e+08	1.02826	1.00039	1.00051	0.013936	0.00919075	2.00089	-0.000120521	0.000278681	0.0166937	8.5122e-06	1.00038	1.0005	-0.380018	1.96061	112.335	-0.338379	-19.3877	2.29899	131.722	-0.665523	0.746377	-0.338379	-19.3877	0.943294	-0.331958	-0.0161345	0.00428482	-0.966498	0.256673	2.88201	165.127	0.834802	0.550551	0.583024	33.4048	0.000282023	0.0167935	2.51228e+06	0.0176573	0.0176573	-0.0176534	-0.0176534	0.00402645	0.00402645	0.00404351
		606	1.01407	1.51702e+08	1.02833	1.00038	1.00051	0.0139753	0.00913078	2.00089	-0.000123098	0.000278681	0.0166937	8.05039e-06	1.00038	1.0005	-0.388146	1.96942	112.839	-0.333977	-19.1355	2.30339	131.975	-0.668802	0.743441	-0.333977	-19.1355	0.944746	-0.327803	-0.0161349	0.00428315	-0.966525	0.256572	2.88212	165.133	0.83716	0.546958	0.578726	33.1586	0.000281561	0.0167798	2.51022e+06	0.0176569	0.0176569	-0.017653	-0.017653	0.00402814	0.00402814	0.0040452
		607	1.01411	1.51708e+08	1.02841	1.00038	1.00051	0.0140147	0.00907048	2.00089	-0.000126349	0.000278686	0.0166939	7.92823e-06	1.00037	1.0005	-0.398396	1.98056	113.478	-0.328403	-18.8161	2.30897	132.294	-0.672936	0.739701	-0.328403	-18.8161	0.946559	-0.322532	-0.0161405	0.00426285	-0.966848	0.255354	2.88338	165.205	0.839512	0.543341	0.574412	32.9114	0.000281439	0.0167762	2.50968e+06	0.0176515	0.0176515	-0.0176476	-0.0176476	0.00404858	0.00404858	0.00406564
		608	1.01414	1.51714e+08	1.02849	1.00038	1.00051	0.0140536	0.00901018	2.00089	-0.000128495	0.000278686	0.0166939	8.36591e-06	1.00037	1.0005	-0.405162	1.98795	113.901	-0.324709	-18.6045	2.31266	132.506	-0.675664	0.73721	-0.324709	-18.6045	0.947744	-0.319033	-0.0161379	0.00427257	-0.966694	0.255936	2.88278	165.171	0.841839	0.539729	0.570116	32.6652	0.000281877	0.0167892	2.51163e+06	0.0176542	0.0176542	-0.0176502	-0.0176502	0.00403882	0.00403882	0.00405588
2016-06-02	153	609	1.01418	1.51719e+08	1.02857	1.00038	1.00051	0.0140924	0.00894949	2.00089	-0.000129863	0.000278689	0.016694	8.41769e-06	1.00037	1.0005	-0.409475	1.99267	114.172	-0.322348	-18.4692	2.31502	132.641	-0.677403	0.735613	-0.322348	-18.4692	0.948494	-0.316794	-0.0161296	0.00430413	-0.966192	0.257825	2.88082	165.059	0.84416	0.536091	0.5658	32.4179	0.000281929	0.0167907	2.51186e+06	0.0176628	0.0176628	-0.0176589	-0.0176589	0.00400718	0.00400718	0.00402425
		610	1.01422	1.51725e+08	1.02864	1.00038	1.00051	0.0141307	0.00888879	2.00089	-0.000132325	0.000278686	0.0166939	7.92952e-06	1.00037	1.0005	-0.417239	2.0012	114.66	-0.318084	-18.2249	2.31929	132.885	-0.680533	0.732718	-0.318084	-18.2249	0.949836	-0.312747	-0.0161294	0.00430467	-0.966183	0.257859	2.88079	165.057	0.846457	0.532458	0.561501	32.1717	0.000281441	0.0167762	2.50968e+06	0.0176629	0.0176629	-0.017659	-0.017659	0.0040066	0.0040066	0.00402367
		611	1.01426	1.51731e+08	1.02871	1.00038	1.00051	0.0141689	0.00882778	2.00089	-0.000135437	0.000278689	0.016694	7.76871e-06	1.00037	1.0005	-0.427049	2.01202	115.28	-0.312673	-17.9149	2.3247	133.195	-0.684487	0.729025	-0.312673	-17.9149	0.951515	-0.307603	-0.0161341	0.00428701	-0.966465	0.2568	2.88188	165.12	0.848746	0.5288	0.557187	31.9244	0.00028128	0.0167714	2.50897e+06	0.0176582	0.0176582	-0.0176543	-0.0176543	0.00402437	0.00402437	0.00404144
		612	1.01429	1.51736e+08	1.02879	1.00038	1.00051	0.0142068	0.00876676	2.00089	-0.000137591	0.000278688	0.0166939	8.0937e-06	1.00037	1.00051	-0.433843	2.01955	115.712	-0.30891	-17.6992	2.32846	133.411	-0.687226	0.726444	-0.30891	-17.6992	0.952666	-0.30402	-0.0161318	0.00429565	-0.966327	0.257318	2.88135	165.089	0.851012	0.525146	0.552887	31.6781	0.000281605	0.0167811	2.51041e+06	0.0176605	0.0176605	-0.0176566	-0.0176566	0.00401568	0.00401568	0.00403275
2016-06-03	154	613	1.01433	1.51742e+08	1.02886	1.00038	1.00051	0.0142446	0.00870546	2.00089	-0.00013917	0.000278692	0.0166941	8.13378e-06	1.00037	1.00051	-0.438822	2.02508	116.029	-0.306143	-17.5407	2.33123	133.569	-0.689233	0.724539	-0.306143	-17.5407	0.953503	-0.301383	-0.0161253	0.00432065	-0.965927	0.258813	2.8798	165	0.85327	0.52147	0.548573	31.4309	0.000281645	0.0167823	2.51059e+06	0.0176674	0.0176674	-0.0176635	-0.0176635	0.00399064	0.00399064	0.00400771
		614	1.01437	1.51747e+08	1.02894	1.00037	1.00052	0.0142818	0.00864415	2.00089	-0.000141895	0.000278691	0.016694	7.60848e-06	1.00037	1.00051	-0.447414	2.03467	116.578	-0.301351	-17.2661	2.33602	133.844	-0.692698	0.721228	-0.301351	-17.2661	0.954936	-0.296811	-0.0161274	0.00431264	-0.966056	0.258334	2.8803	165.029	0.855502	0.517799	0.544276	31.1847	0.000281119	0.0167666	2.50825e+06	0.0176652	0.0176652	-0.0176613	-0.0176613	0.00399866	0.00399866	0.00401573
		615	1.0144	1.51752e+08	1.02901	1.00037	1.00052	0.014319	0.00858258	2.00089	-0.00014517	0.000278695	0.0166942	7.36102e-06	1.00036	1.00051	-0.45774	2.04625	117.241	-0.295561	-16.9344	2.34181	134.176	-0.696862	0.717205	-0.295561	-16.9344	0.956639	-0.291276	-0.0161338	0.0042888	-0.966437	0.256904	2.88177	165.114	0.857726	0.514107	0.539966	30.9378	0.000280872	0.0167592	2.50715e+06	0.0176589	0.0176589	-0.017655	-0.017655	0.00402266	0.00402266	0.00403973
		616	1.01444	1.51758e+08	1.02908	1.00037	1.00052	0.0143557	0.008521	2.00089	-0.000147316	0.000278693	0.0166941	7.68553e-06	1.00036	1.00051	-0.464508	2.05387	117.678	-0.291748	-16.7159	2.34562	134.394	-0.699592	0.714543	-0.291748	-16.7159	0.957743	-0.287626	-0.0161317	0.00429653	-0.966313	0.257368	2.8813	165.086	0.859925	0.51042	0.535673	30.6918	0.000281197	0.0167689	2.50859e+06	0.0176609	0.0176609	-0.017657	-0.017657	0.00401488	0.00401488	0.00403195
2016-06-04	155	617	1.01447	1.51763e+08	1.02915	1.00037	1.00052	0.0143923	0.00845908	2.00089	-0.000148786	0.000278696	0.0166942	7.67476e-06	1.00036	1.00051	-0.469144	2.05912	117.979	-0.289126	-16.5657	2.34824	134.544	-0.701462	0.712707	-0.289126	-16.5657	0.958493	-0.285115	-0.0161245	0.0043238	-0.965877	0.259	2.87961	164.989	0.862118	0.506708	0.531362	30.4448	0.000281186	0.0167686	2.50855e+06	0.0176683	0.0176683	-0.0176645	-0.0176645	0.00398752	0.00398752	0.0040046
		618	1.01451	1.51768e+08	1.02923	1.00037	1.00052	0.0144285	0.00839716	2.00089	-0.000151226	0.000278695	0.0166942	7.18727e-06	1.00036	1.00051	-0.476834	2.06785	118.479	-0.284762	-16.3157	2.35261	134.795	-0.704566	0.709638	-0.284762	-16.3157	0.959729	-0.280929	-0.0161248	0.00432268	-0.965895	0.258934	2.87967	164.993	0.864286	0.503	0.527066	30.1987	0.000280698	0.0167541	2.50637e+06	0.017668	0.017668	-0.0176642	-0.0176642	0.00398862	0.00398862	0.0040057
		619	1.01454	1.51773e+08	1.0293	1.00037	1.00052	0.0144647	0.00833492	2.00089	-0.000154314	0.000278699	0.0166943	7.0273e-06	1.00036	1.00051	-0.486573	2.07896	119.116	-0.279205	-15.9973	2.35816	135.113	-0.708499	0.705712	-0.279205	-15.9973	0.961275	-0.275592	-0.0161303	0.00430265	-0.966216	0.257732	2.88092	165.064	0.866448	0.499268	0.522754	29.9516	0.000280538	0.0167493	2.50566e+06	0.0176627	0.0176627	-0.0176588	-0.0176588	0.00400882	0.00400882	0.00402589
		620	1.01458	1.51779e+08	1.02937	1.00037	1.00052	0.0145004	0.00827268	2.00089	-0.000156349	0.000278698	0.0166942	7.40226e-06	1.00036	1.00052	-0.492988	2.08632	119.537	-0.275526	-15.7865	2.36184	135.324	-0.71109	0.703101	-0.275526	-15.7865	0.962282	-0.272053	-0.0161276	0.0043126	-0.966057	0.258329	2.8803	165.029	0.868585	0.495541	0.518457	29.7054	0.000280913	0.0167605	2.50733e+06	0.0176654	0.0176654	-0.0176615	-0.0176615	0.0039988	0.0039988	0.00401587
2016-06-05	156	621	1.01461	1.51784e+08	1.02944	1.00037	1.00052	0.014536	0.00821011	2.00089	-0.000157733	0.000278702	0.0166944	7.45463e-06	1.00036	1.00052	-0.497353	2.09134	119.825	-0.273015	-15.6426	2.36436	135.468	-0.712854	0.701313	-0.273015	-15.6426	0.962962	-0.269636	-0.0161199	0.00434169	-0.96559	0.260069	2.8785	164.926	0.870714	0.491789	0.514143	29.4583	0.000280966	0.016762	2.50756e+06	0.0176733	0.0176733	-0.0176695	-0.0176695	0.00396962	0.00396962	0.0039867
		622	1.01465	1.51789e+08	1.02951	1.00036	1.00052	0.0145711	0.00814754	2.00089	-0.000160213	0.0002787	0.0166943	6.96681e-06	1.00036	1.00052	-0.505173	2.10038	120.343	-0.268496	-15.3837	2.36887	135.726	-0.716016	0.698084	-0.268496	-15.3837	0.964171	-0.265281	-0.0161208	0.00433811	-0.965648	0.259855	2.87872	164.939	0.87282	0.488043	0.509846	29.212	0.000280478	0.0167475	2.50539e+06	0.0176723	0.0176723	-0.0176685	-0.0176685	0.0039732	0.0039732	0.00399028
[truncated: 838 more rows]
[truncated: 97 more columns]
